# Supplementary material
Source: publisher figshare collection journal article supplement (https://plos.figshare.com/articles/dataset/_/3973737)

|                     |                      |                    |                    |                    |                    |         |
|---------------------|----------------------|--------------------|--------------------|--------------------|--------------------|---------|
| 0 (0%) (1.0e+00)    | 195 (43%) (1.3e−159) | 17 (6%) (6.7e−01)  | 0 (0%) (1.0e+00)   | 1 (2%) (1.0e+00)   | 0 (0%) (1.0e+00)   | C_all4  |
| 97 (31%) (2.4e−53)  | 0 (0%) ( 1.0e+00)    | 0 (0%) (1.0e+00)   | 0 (0%) (1.0e+00)   | 4 (6%) (4.5e−01)   | 0 (0%) (1.0e+00)   | C_all14 |
| 100 (29%) (4.9e−53) | 0 (0%) ( 1.0e+00)    | 0 (0%) (1.0e+00)   | 0 (0%) (1.0e+00)   | 1 (2%) (1.0e+00)   | 3 (6%) (9.4e−01)   | C_all11 |
| 0 (0%) (1.0e+00)    | 53 (19%) ( 6.9e−23)  | 71 (26%) (1.4e−51) | 0 (0%) (1.0e+00)   | 0 (0%) (1.0e+00)   | 0 (0%) (1.0e+00)   | C_all20 |
| 0 (0%) (1.0e+00)    | 63 (21%) ( 3.8e−30)  | 70 (24%) (1.0e−48) | 0 (0%) (1.0e+00)   | 2 (3%) (1.0e+00)   | 4 (8%) (2.3e−01)   | C_all17 |
| 0 (0%) (1.0e+00)    | 6 (3%) ( 1.0e+00)    | 44 (24%) (2.5e−30) | 0 (0%) (1.0e+00)   | 0 (0%) (1.0e+00)   | 0 (0%) (1.0e+00)   | C_all29 |
| 71 (20%) (2.9e−26)  | 0 (0%) ( 1.0e+00)    | 0 (0%) (1.0e+00)   | 0 (0%) (1.0e+00)   | 1 (2%) (1.0e+00)   | 5 (10%) (1.2e−01)  | C_all10 |
| 5 (1%) (1.0e+00)    | 0 (0%) ( 1.0e+00)    | 2 (1%) (1.0e+00)   | 80 (27%) (4.1e−26) | 0 (0%) (1.0e+00)   | 2 (4%) (1.0e+00)   | C_all2  |
| 55 (25%) (1.1e−24)  | 0 (0%) ( 1.0e+00)    | 0 (0%) (1.0e+00)   | 0 (0%) (1.0e+00)   | 2 (3%) (1.0e+00)   | 0 (0%) (1.0e+00)   | C_all26 |
| 3 (1%) (1.0e+00)    | 0 (0%) ( 1.0e+00)    | 0 (0%) (1.0e+00)   | 39 (13%) (1.1e−16) | 0 (0%) (1.0e+00)   | 0 (0%) (1.0e+00)   | C_all15 |
| 35 (15%) (6.1e−09)  | 0 (0%) ( 1.0e+00)    | 0 (0%) (1.0e+00)   | 34 (14%) (3.1e−16) | 0 (0%) (1.0e+00)   | 0 (0%) (1.0e+00)   | C_all23 |
| 0 (0%) (1.0e+00)    | 9 (6%) ( 8.2e−01)    | 27 (18%) (6.2e−15) | 0 (0%) (1.0e+00)   | 0 (0%) (1.0e+00)   | 0 (0%) (1.0e+00)   | C_all31 |
| 0 (0%) (1.0e+00)    | 0 (0%) ( 1.0e+00)    | 0 (0%) (1.0e+00)   | 0 (0%) (1.0e+00)   | 13 (20%) (2.1e−14) | 0 (0%) (1.0e+00)   | C_all44 |
| 0 (0%) (1.0e+00)    | 91 (20%) ( 3.6e−13)  | 2 (1%) (1.0e+00)   | 0 (0%) (1.0e+00)   | 0 (0%) (1.0e+00)   | 0 (0%) (1.0e+00)   | C_all1  |
| 2 (1%) (1.0e+00)    | 0 (0%) ( 1.0e+00)    | 0 (0%) (1.0e+00)   | 36 (12%) (2.9e−12) | 0 (0%) (1.0e+00)   | 0 (0%) (1.0e+00)   | C_all8  |
| 36 (10%) (3.0e−05)  | 1 (0%) ( 1.0e+00)    | 0 (0%) (1.0e+00)   | 34 (12%) (2.1e−11) | 0 (0%) (1.0e+00)   | 0 (0%) (1.0e+00)   | C_all9  |
| 0 (0%) (1.0e+00)    | 0 (0%) ( 1.0e+00)    | 26 (12%) (3.3e−10) | 0 (0%) (1.0e+00)   | 1 (2%) (1.0e+00)   | 0 (0%) (1.0e+00)   | C_all27 |
| 50 (12%) (3.3e−09)  | 0 (0%) ( 1.0e+00)    | 0 (0%) (1.0e+00)   | 34 (12%) (2.2e−09) | 1 (2%) (1.0e+00)   | 11 (22%) (1.5e−05) | C_all7  |
| 51 (12%) (3.0e−09)  | 0 (0%) ( 1.0e+00)    | 0 (0%) (1.0e+00)   | 0 (0%) (1.0e+00)   | 0 (0%) (1.0e+00)   | 8 (16%) (4.5e−03)  | C_all6  |
| 0 (0%) (1.0e+00)    | 0 (0%) ( 1.0e+00)    | 0 (0%) (1.0e+00)   | 0 (0%) (1.0e+00)   | 3 (5%) (1.1e−01)   | 7 (14%) (6.0e−06)  | C_all39 |
| 0 (0%) (1.0e+00)    | 1 (2%) ( 1.0e+00)    | 0 (0%) (1.0e+00)   | 0 (0%) (1.0e+00)   | 6 (9%) (2.6e−05)   | 0 (0%) (1.0e+00)   | C_all47 |
| 0 (0%) (1.0e+00)    | 0 (0%) ( 1.0e+00)    | 0 (0%) (1.0e+00)   | 0 (0%) (1.0e+00)   | 6 (9%) (8.5e−05)   | 0 (0%) (1.0e+00)   | C_all45 |
| 1 (1%) (1.0e+00)    | 0 (0%) ( 1.0e+00)    | 0 (0%) (1.0e+00)   | 1 (1%) (1.0e+00)   | 5 (8%) (5.0e−04)   | 1 (2%) (1.0e+00)   | C_all46 |
| 27 (9%) (1.6e−03)   | 0 (0%) ( 1.0e+00)    | 0 (0%) (1.0e+00)   | 6 (2%) (1.0e+00)   | 0 (0%) (1.0e+00)   | 0 (0%) (1.0e+00)   | C_all18 |
| 16 (12%) (1.6e−03)  | 0 (0%) ( 1.0e+00)    | 0 (0%) (1.0e+00)   | 2 (2%) (1.0e+00)   | 0 (0%) (1.0e+00)   | 1 (2%) (1.0e+00)   | C_all33 |
| 0 (0%) (1.0e+00)    | 0 (0%) ( 1.0e+00)    | 6 (3%) (1.0e+00)   | 0 (0%) (1.0e+00)   | 6 (9%) (1.4e−02)   | 3 (6%) (4.7e−01)   | C_all24 |
| 0 (0%) (1.0e+00)    | 6 (2%) ( 1.0e+00)    | 2 (1%) (1.0e+00)   | 0 (0%) (1.0e+00)   | 7 (11%) (1.5e−02)  | 0 (0%) (1.0e+00)   | C_all12 |
| 0 (0%) (1.0e+00)    | 0 (0%) ( 1.0e+00)    | 1 (0%) (1.0e+00)   | 0 (0%) (1.0e+00)   | 0 (0%) (1.0e+00)   | 5 (10%) (2.3e−02)  | C_all25 |
| 0 (0%) (1.0e+00)    | 0 (0%) ( 1.0e+00)    | 8 (8%) (2.7e−02)   | 0 (0%) (1.0e+00)   | 0 (0%) (1.0e+00)   | 0 (0%) (1.0e+00)   | C_all38 |
| 0 (0%) (1.0e+00)    | 18 (6%) ( 1.2e−01)   | 5 (2%) (1.0e+00)   | 0 (0%) (1.0e+00)   | 0 (0%) (1.0e+00)   | 0 (0%) (1.0e+00)   | C_all19 |
| 1 (1%) (1.0e+00)    | 0 (0%) ( 1.0e+00)    | 6 (7%) (1.4e−01)   | 1 (1%) (1.0e+00)   | 0 (0%) (1.0e+00)   | 0 (0%) (1.0e+00)   | C_all41 |
| 0 (0%) (1.0e+00)    | 1 (1%) ( 1.0e+00)    | 0 (0%) (1.0e+00)   | 0 (0%) (1.0e+00)   | 3 (5%) (4.5e−01)   | 0 (0%) (1.0e+00)   | C_all28 |
| 6 (5%) (1.0e+00)    | 0 (0%) ( 1.0e+00)    | 0 (0%) (1.0e+00)   | 6 (5%) (4.7e−01)   | 0 (0%) (1.0e+00)   | 0 (0%) (1.0e+00)   | C_all34 |
| 0 (0%) (1.0e+00)    | 1 (0%) ( 1.0e+00)    | 3 (1%) (1.0e+00)   | 6 (2%) (1.0e+00)   | 0 (0%) (1.0e+00)   | 0 (0%) (1.0e+00)   | C_all3  |
| 1 (0%) (1.0e+00)    | 2 (0%) ( 1.0e+00)    | 1 (0%) (1.0e+00)   | 6 (2%) (1.0e+00)   | 0 (0%) (1.0e+00)   | 0 (0%) (1.0e+00)   | C_all5  |
| 0 (0%) (1.0e+00)    | 0 (0%) ( 1.0e+00)    | 0 (0%) (1.0e+00)   | 2 (1%) (1.0e+00)   | 0 (0%) (1.0e+00)   | 0 (0%) (1.0e+00)   | C_all13 |
| 4 (1%) (1.0e+00)    | 0 (0%) ( 1.0e+00)    | 6 (2%) (1.0e+00)   | 0 (0%) (1.0e+00)   | 3 (5%) (1.0e+00)   | 0 (0%) (1.0e+00)   | C_all16 |
| 0 (0%) (1.0e+00)    | 0 (0%) ( 1.0e+00)    | 2 (1%) (1.0e+00)   | 2 (1%) (1.0e+00)   | 0 (0%) (1.0e+00)   | 0 (0%) (1.0e+00)   | C_all21 |
| 1 (0%) (1.0e+00)    | 2 (1%) ( 1.0e+00)    | 0 (0%) (1.0e+00)   | 0 (0%) (1.0e+00)   | 0 (0%) (1.0e+00)   | 0 (0%) (1.0e+00)   | C_all22 |
| 0 (0%) (1.0e+00)    | 0 (0%) ( 1.0e+00)    | 1 (1%) (1.0e+00)   | 1 (1%) (1.0e+00)   | 1 (2%) (1.0e+00)   | 0 (0%) (1.0e+00)   | C_all30 |
| 0 (0%) (1.0e+00)    | 1 (1%) ( 1.0e+00)    | 1 (1%) (1.0e+00)   | 3 (2%) (1.0e+00)   | 0 (0%) (1.0e+00)   | 0 (0%) (1.0e+00)   | C_all32 |
| 2 (2%) (1.0e+00)    | 0 (0%) ( 1.0e+00)    | 0 (0%) (1.0e+00)   | 0 (0%) (1.0e+00)   | 0 (0%) (1.0e+00)   | 0 (0%) (1.0e+00)   | C_all35 |
| 3 (3%) (1.0e+00)    | 0 (0%) ( 1.0e+00)    | 2 (2%) (1.0e+00)   | 0 (0%) (1.0e+00)   | 0 (0%) (1.0e+00)   | 0 (0%) (1.0e+00)   | C_all36 |
| 0 (0%) (1.0e+00)    | 0 (0%) ( 1.0e+00)    | 2 (2%) (1.0e+00)   | 0 (0%) (1.0e+00)   | 0 (0%) (1.0e+00)   | 0 (0%) (1.0e+00)   | C_all37 |
| 0 (0%) (1.0e+00)    | 1 (1%) ( 1.0e+00)    | 3 (3%) (1.0e+00)   | 0 (0%) (1.0e+00)   | 0 (0%) (1.0e+00)   | 0 (0%) (1.0e+00)   | C_all40 |
| 2 (2%) (1.0e+00)    | 0 (0%) ( 1.0e+00)    | 0 (0%) (1.0e+00)   | 0 (0%) (1.0e+00)   | 0 (0%) (1.0e+00)   | 0 (0%) (1.0e+00)   | C_all42 |
| 0 (0%) (1.0e+00)    | 2 (2%) ( 1.0e+00)    | 0 (0%) (1.0e+00)   | 0 (0%) (1.0e+00)   | 0 (0%) (1.0e+00)   | 0 (0%) (1.0e+00)   | C_all43 |
| 0 (0%) (1.0e+00)    | 1 (2%) ( 1.0e+00)    | 0 (0%) (1.0e+00)   | 0 (0%) (1.0e+00)   | 0 (0%) (1.0e+00)   | 0 (0%) (1.0e+00)   | C_all48 |
| ϕ                   | ϕ                    | ϕ                  | ϕ                  | ϕ                  | ϕ                  |         |

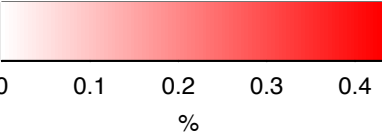

Supplement: Supplementary file 1 [file 1 › S5 Fig.PDF]
