# Supplementary material
Source: publisher figshare collection journal article supplement (https://plos.figshare.com/articles/dataset/_/3973737)
Supplement: Supplementary file 1 [file 1]

Archive with 32 entries (32 files):
- S1 Data.TXT
- S2 Data.XLSX
- S3 Data.TXT
- S4 Data.XLSX
- S5 Data.TXT
- S1 Fig.PDF
- S2 Fig.PDF
- S3 Fig.PDF
- S4 Fig.PDF
- S5 Fig.PDF
- S6 Fig.PDF
- S7 Fig.PDF
- S8 Fig.PDF
- S9 Fig.PDF
- S10 Fig.PDF
- S11 Fig.PDF
- S12 Fig.PDF
- S13 Fig.PDF
- S14 Fig.PDF
- S15 Fig.PDF
- S16 Fig.PDF
- S17 Fig.PDF
- S18 Fig.PDF
- S19 Fig.PDF
- S20 Fig.PDF
- S1 Table.PDF
- S2 Table.PDF
- S3 Table.PDF
- S4 Table.PDF
- S5 Table.PDF
- S6 Table.PDF
- S1 Text.PDF
