# Supplementary material
Source: publisher figshare collection journal article supplement (https://plos.figshare.com/articles/dataset/_/3973737)
Supplement: Supplementary file 1 [file 1 › S1 Data.TXT]

h_2days	h_5days	h_16days	h_20days	h_35days	h_96days	h_107days	h_212days	h_443days	h_488days	h_787days	h_1016days	h_1460days	h_1718days	h_1734days	h_2827days	h_2922days	h_3134days	h_3912days	h_4309days	h_5105days	h_5594days	h_6205days	h_6935days	h_7363days	h_7521days	h_8352days	h_8760days	h_9897days	h_10220days	h_10948days	h_13140days	h_14235days	h_15206days	h_18250days	h_19457days	h_20440days	h_22452days	a_730days	a_1625days	a_1825days	a_1825days	a_2045days	a_2610days	a_2920days	a_3224days	a_3650days	a_3650days	a_4015days	a_5236days
ENSG00000004059	278.27	449.7	349.56	480.38	568.45	707.16	576.14	653.54	397.41	533.72	548.1	497.16	434.85	901.71	479.75	617.6	535.04	294.17	541.18	422.52	583.51	425.33	429.05	445.57	610.59	666.23	737.98	695.85	712.5	655.32	570.28	655.53	700.84	493.37	568.14	448.68	536.24	617	348.12	569.16	329.2	481.67	515.53	331.3	507.47	420.74	484.89	486.22	463.83
ENSG00000003056	50.36	90.97	97.15	88.06	73.3	62.64	65.09	85.82	70.39	97.74	75.08	104.72	72.39	79.74	89.21	101.45	101.79	83.6	101.2	95.24	101.58	116.64	103.49	60.25	149.42	82.13	91.22	78.11	85.43	111.62	114.84	101.86	103.29	114.29	102.14	105.21	85.02	102.11	125.63	87.82	77.86	100.02	103.36	56.32	118.44	109.37	92.25	95.67	50.63
ENSG00000173153	26.67	23.43	30.71	33.68	17.8	42.94	34.23	31.6	32.74	48.06	39.38	38.92	45.2	54.14	53.99	34.62	36.53	26.25	40.11	35.07	25.29	24.56	28.8	42.58	41	51.69	54.67	58.62	38.09	42.66	35.69	41.95	78.08	41.53	40.75	54.58	46.08	43.75	24.68	34.34	53.83	63.79	34.27	44.84	27.23	39.49	36.29	36.62	29.4
ENSG00000004478	318.18	112.63	233.3	651.37	129.49	149.95	107.34	107.58	135.9	173.73	180.29	190.84	187.24	189.94	215.48	163.55	162.19	168.46	161.09	149.49	201.45	194.1	167.4	173.64	215.67	169.19	324.81	229.42	254.44	244.96	169.46	157.01	283.28	245.37	194.39	216.73	197.48	160.31	120.98	161.57	206.88	186.82	157.17	125.26	226.82	192.67	337.32	157.85	180.16
ENSG00000003137	4.92	10.31	18.35	7.2	27.57	12.65	9.9	41.48	47.73	41.36	49.24	47.47	15.86	71.07	24.83	46.65	12.66	16.05	21.57	27.1	15.51	53.87	45.44	5.46	27.57	45.35	43.42	22.1	24.29	29.88	20.73	22.79	28.81	49.38	17.15	14.31	12.59	10.21	19.67	39.96	23.1	51.34	14.54	38.3	34.56	10.56	3.12	36.21	31.22
ENSG00000003509	21.18	20.63	14.28	28.24	3.83	22.6	26.31	21.89	22.5	11.49	25.6	20.77	20.67	7.58	11.14	20.82	14.56	15.37	26.64	21.85	27.22	21.08	24.62	24.29	18.19	22.6	12.57	20.59	8.68	17.17	14.59	19.35	22.75	7.77	19.83	20.8	20	15.32	15.62	19.41	18.51	30.08	31.08	14.19	25.35	19.57	22.56	19.71	13.27
ENSG00000001036	14.96	13.51	28.86	29.32	11.83	23.26	37.86	31.37	14.65	18.71	19.33	26.37	27.64	15.79	18.34	19.06	17.57	20.86	22.88	18.67	16.8	13.24	19.3	21.85	15.31	15.61	17.78	17.33	25.98	19.48	19.4	22.11	18.76	34.35	17.66	23.35	18.18	32	24.33	18.54	20.61	14.28	27.56	14.34	17.34	16.95	21.55	9.18	21.48
ENSG00000002587	42.83	27.37	10.44	31.31	17.15	37.26	36.11	38.14	29.32	37.25	40.66	40.51	24.11	49.51	39.64	31.77	21.11	13.95	19.09	17.79	23.21	21.83	26.61	12.71	20.68	31.87	40.53	29.73	13.57	20.53	17.69	19.45	30.88	14.91	14.63	26.09	29.67	14.51	17.48	37.72	25.97	96.2	25.44	32.68	18.75	7.15	20.54	28.96	28.73
ENSG00000001617	29.89	14.09	15.91	13.64	8.92	2.91	7.06	2.7	1.79	2.42	1.16	1.97	6.73	2.1	9.7	2.12	3.58	1.83	4.21	5.76	3.82	1.59	1.79	13.09	3.2	5.8	2.91	2.8	2.8	0.79	3.24	5.34	5.14	7.17	3.62	1.29	3.16	13.45	3.91	1.18	6.92	4.47	9.17	5.98	7.93	3.24	2.97	1.33	2.15
ENSG00000001630	46.56	51.4	40.64	68.26	39.89	47.39	50.99	48.43	35.6	39.83	27	44.62	45.68	25.8	30.46	51.05	49.6	43.3	34.91	28.05	38.84	47.64	45.62	20.74	50.91	50.62	25.48	33.07	24.01	47.28	28.52	25.76	36.9	23.77	48.97	43.83	34.59	32.71	32.41	41.09	40.69	36.72	34.39	39.68	25.6	33.22	25.78	42.86	20.51
ENSG00000048028	23.22	15.17	18.23	15.81	3.78	14.38	13.33	12.27	12.48	4.53	18.2	14.69	12.07	2.44	6.66	11.02	4.08	11.92	13.63	16.43	12.99	12.39	9.89	18.76	5.27	6.86	2.88	12.42	3.87	5.99	8.5	13.02	10.63	3.52	12.52	11.83	14.2	5.2	15.65	11.26	13.45	13.55	15.98	3.25	21.92	11.31	16.73	13.45	10.52
ENSG00000003989	1.25	0.94	4.75	3.17	0.78	1.84	5.86	1.14	0.52	0	0.81	0.83	7.82	0.73	2.96	1.34	3.27	3.03	5.54	8.31	1.67	2.05	1.3	23.99	1.44	1.42	1.23	4.06	5.31	1.6	7.05	1.41	0.28	5.95	1.17	1	3.92	15.97	13.62	0.91	2.92	1.18	7.36	10.43	2.18	3.77	6.64	0.51	0.62
ENSG00000004799	1.31	26.31	1.56	12.6	0	3.36	5.95	0.45	0	1.47	6.33	5.86	14.54	0.76	5.56	2.44	2.32	34.13	4.08	9.5	8.24	1.28	1.62	12.14	0.32	3.32	1.44	10.16	2.77	2.5	6.24	10.57	3.11	6.5	3.28	5.46	8.8	7.6	9.34	1.78	5.71	2.58	9.51	5.43	11.36	6.42	32.37	4.41	6.83
ENSG00000006611	0	0	0	0.52	0.52	0.28	1.05	0.51	0.23	3.36	0.97	0.75	0.33	0	0.8	0.8	3.72	3.53	1.75	1.81	0.75	0.92	1.86	1.21	1.11	0.95	0.55	1.82	3.17	0.82	2.95	1.26	1.27	2.66	1.46	0.67	1.1	0	1.28	0.2	1.31	3.17	0.91	0	1.3	2.76	0.95	0.92	0.56
ENSG00000006451	107.95	98.17	36.5	82.42	44.97	34.42	32.78	49.65	54.14	30.63	32.77	47.31	43.98	17.47	20.28	42.4	25.86	33.96	37.53	30.24	49.22	49.03	39.59	34.68	33.34	24.27	13.4	29.07	11.01	41.92	22.66	23.68	22.97	10.17	35.56	23.29	23.6	21.6	32.7	42.63	37.51	28.63	42.59	16.21	36.18	44.7	43.77	38.31	19.43
ENSG00000006116	64.83	107.72	16.59	123.78	189.56	142.97	150.44	212.15	272.75	240.97	236.96	257.54	171.44	347.26	295.35	307.92	371	200.22	216.69	132.82	297.61	251.22	267.01	130.22	306.82	210.51	369.44	158.42	376.52	230.72	309.22	142.38	120.81	268.66	215.02	159.23	136.6	63.05	164.09	364.32	108.47	178.77	150.54	261.65	170.72	245.59	141.17	258.03	124.52
ENSG00000006118	189.37	263.76	266.01	284.96	377.26	388.63	290.54	304.21	194.18	238.57	348.54	198.81	252.66	399.11	264.67	261.82	250.33	181.38	195.4	191.12	207.85	191.09	162.37	198.43	231.76	205.37	233.31	220.02	294.36	174.47	200.62	185.24	170.23	220.53	153.91	123.23	214.28	213.48	211.65	280.96	188	210.2	159.45	145.12	237.19	219.68	275.05	340.07	230.7
ENSG00000004975	46.39	26.76	73.51	44.04	20.14	32.76	49.36	37.85	25.64	30.31	43.66	31.13	38.03	18.99	26.66	24.21	23.61	25.17	46.43	46.9	27.16	26.11	23.6	54.01	16.93	21.68	19.89	38.69	28.1	16.76	20.12	32.76	43.43	29.61	32.01	23.33	43.4	38.52	34.65	29.93	35.12	35.67	39.88	12.14	42.77	26.9	46.4	41.47	36.56
ENSG00000005175	6.87	5.88	2.17	9.75	3.59	5.35	8.49	8.82	10.8	1.81	5.75	11.08	6.83	1.89	2.58	13.61	1.44	8.21	9.77	10.18	9.12	13.85	15.32	6.21	3.99	6.51	0.89	11	4.28	8.39	4.77	8.99	9.61	1.72	10.6	7.48	8.28	6.04	8.78	8.39	9.19	8.67	11.28	13.43	8.2	7.28	7.96	8.43	6.04
ENSG00000006652	75.05	53.95	50.15	181.76	21.43	61.73	90.91	58.06	56.62	27.38	43.1	60.25	48.23	10.78	34.19	63.35	49.07	38.45	60.85	40.98	67.22	45.78	40.34	56.31	28.77	67.69	23.67	64.83	21.02	42.62	49.88	43.77	43.7	23.29	52.85	49.77	54.03	55.38	57.87	65.73	54.14	39.33	68.63	49.49	58	66.29	122.93	39.11	58.72
ENSG00000006210	34.61	199.99	213.59	127.17	388.16	212.02	274.65	550.59	401.41	582.24	320.53	546.2	349.09	626.64	220.76	579.69	573.6	209.24	197.95	262.72	520.87	429.32	430.1	102.55	511.89	362.04	339.65	134.55	407.14	233.21	427.99	171.15	172.44	533.18	206.04	192.84	182.32	105.37	349.48	605.13	110.92	507.91	321.87	191.73	214	358.81	139.22	354	86.18
ENSG00000006282	52.97	84.36	38.64	64.2	68.61	84.77	81.21	77.25	73.94	81.21	76.24	49.28	117.85	59.72	101.45	77.95	62.15	91.93	81.83	112.07	71.23	60.24	75.82	98.61	78.5	79.04	61.44	130.65	107.19	78.02	78.58	130.43	93.61	90.1	95.79	68.44	132.84	158.94	77.41	76.93	100.5	75.69	104.31	71.03	101.05	74.9	101.13	58.63	180.8
ENSG00000007520	99.61	143.61	174.37	147.33	191.66	230.43	169.57	205.06	193.55	231.08	220.2	170.82	173.81	296	256.75	184.26	199.75	144.52	175.93	161.34	173.11	133.88	115.28	149.14	159.83	207.88	220.65	243.91	203.33	171.25	160.83	220.59	189.09	161.08	144.43	175.47	157.75	198.65	141.76	224.09	213.38	126.77	196.04	97.37	204.92	191.81	168.07	151.02	287.39
ENSG00000006025	20.58	10.66	9.1	19.95	3.92	10.37	14.94	12.21	9.71	8.55	18.47	13.86	14.92	4.23	7.83	8.56	5.14	12.72	9.51	15.88	10.63	9.33	9	15.09	3.76	7.43	2.52	11.11	3.77	3.33	6.86	10.54	12.69	7.32	10	9.1	16.06	10.44	10.67	10.2	10.99	16.56	15.95	0	16.57	8.73	19.61	17.07	9.68
ENSG00000004779	132.04	124.64	161.79	183.09	78.52	296.2	135.66	216.26	171.52	295.17	241.51	192.26	163.27	381.54	312.29	258.46	252.09	115.68	230	211.84	234.51	171.27	134.24	203.67	192.73	571.51	233.46	381.61	296.5	234.18	286.24	332.98	321.52	137.76	253.59	350.06	237.85	240.59	98	264.18	169.35	213.88	222.55	170.97	154.06	234.35	163.34	226.23	279.2
ENSG00000005884	26.27	33.76	18.57	39.72	38.37	15.09	23.04	18.52	20.82	18.96	14.82	15.05	16.39	22.57	18.4	19.69	19.3	19.05	22.84	23.55	23.85	20.7	22.51	20	21.88	15.36	22	15.84	24.93	18.97	23.59	18.32	18.05	41.64	21.9	17.12	19.61	19.05	27.09	20.45	24.54	19.43	27.47	10.03	19.6	21	13.23	24.27	18.49
ENSG00000010626	9.34	9.29	28.52	17.88	7.28	15.26	15.99	12.03	16.12	12.22	30.18	10.35	25.87	12.12	17.66	13.32	13.27	25.6	24.29	15.09	21.37	14.74	7.09	37.75	18.42	20.25	32.85	38.34	24.91	26.09	15.75	12.6	47.96	19.19	20.28	27.88	27.95	24.13	15.43	20.98	19.96	18.16	18.89	8.63	28.28	19.54	24.39	17.84	40.32
ENSG00000008405	46.78	21.28	48.48	70.77	6.43	23.94	26.97	15.63	17.67	8.49	12.15	22.17	16.73	8.84	11.7	18.39	10.1	16.97	18.24	12.44	16.14	17.74	12.54	18.9	14.47	15.17	3.71	14.71	8.42	16.03	16.24	14.53	12.15	4.89	9.98	14.51	16.64	20.18	23.07	18.04	32.47	26.92	23.09	11.43	9.57	14.26	16.02	15.48	21.92
ENSG00000008735	164.51	215.3	133.83	121.13	383.79	226.07	158.99	272.25	248.85	399.04	343.5	229.6	243.99	403.44	376.35	270.48	279.39	327.32	244.03	298.88	231.89	257.39	279.96	285.6	287.66	366.48	421.99	291.94	357.99	279.05	275.71	424.79	354.72	299.17	276.75	296.02	386.17	276.13	190.76	282.65	193.78	249.27	182.19	190.67	309.9	198.04	240.36	369.04	381.98
ENSG00000010270	49.26	65.98	53.36	71.81	27.3	61.47	65.77	63.26	46.26	39.18	28.13	47.95	27.53	28.77	33.28	49.6	43.12	42.38	36.63	29.42	40.31	30.85	27.76	33.32	32.19	35.95	38.78	40.08	33.96	46.94	48.29	35.53	24.9	21.99	39	40.35	31.51	23.78	34.04	43.18	35.04	29.74	47.94	23.8	37.85	34.69	53.11	37.96	34.23
ENSG00000008118	9.63	9.43	3.84	8.3	9.75	5.31	16.3	4.38	29.43	12.6	28.01	16.8	6.43	25.32	21.62	20.6	14.25	17.47	25.67	16.72	23.98	21.62	32.92	23.35	27.7	26.55	30.13	27.31	35.7	31.58	36.1	24.36	13.64	34.25	23.3	27.79	33.36	20.66	7.8	20.61	16.14	21.3	19.96	33.35	23.73	21.02	18.86	32.51	16.79
ENSG00000019582	13.66	4.36	256.29	29.56	5.01	20.08	17.76	25.27	21.82	38.83	13.23	26.25	122.39	43.29	89.17	21.9	190.51	111.8	79.87	41.59	112.68	48.71	46.66	32.31	92.8	54.6	71.78	62.56	406.85	49.56	185.85	164.42	69.58	692.78	62.6	122.27	49.1	484.27	463.24	73.01	118.5	105.7	709.27	24.31	76.33	26.34	233.53	31.72	94.71
ENSG00000009780	5.51	4.4	5.17	3.25	1.84	4.05	7.72	7.51	5.87	7.06	7.12	5.88	2.8	3.68	5.02	7.99	6.15	9.14	7.37	9.15	9.41	3.08	8.31	5.72	5.04	5.34	1.74	5.35	5	3.01	6.19	1.59	5.88	3.92	7.03	5.64	4.61	5.23	9	7.74	9.63	9.77	8.59	6.54	10.04	1.93	4	5.8	8.23
ENSG00000008282	33.13	46.9	45.14	44.22	10.64	57.84	74.67	37.41	12.22	24.38	32.78	39.73	45.15	19.35	27.15	27.12	48.54	43.57	37.14	31.6	20.62	14.19	10.29	44.34	19.91	27.22	7.62	35.22	17.54	20.36	30.26	26.53	20.4	27.24	22.54	55.01	33.33	53.3	45.57	14.71	64.25	26.3	67.82	8.6	25.81	36.44	40.11	18.43	54.14
ENSG00000010017	81.31	70.85	33.96	93.13	35.9	75.54	75.09	81.28	92.05	60.7	87.02	99.93	78.13	46.03	53.73	98.92	68.38	98.79	95.31	103.68	112.27	102.09	117.78	101.17	104.27	105.77	70.86	102.78	42.95	109.82	73.46	104.61	108.11	46.81	121.66	108.39	92.55	87.39	92.09	86.67	56.24	101.92	85.62	134.71	98.89	89	114.05	109.89	81.97
ENSG00000010610	0.59	4.59	9.81	5.66	9.59	3.45	9.03	4.4	8.75	10.19	3.41	1.46	15.14	2.74	10.81	1.88	18.75	4.25	6.4	1.14	6.23	7.47	2.92	3.79	4.63	0.5	6.04	1.14	7.45	3.84	5.6	3.95	4.38	51.29	3.27	4.9	2.06	15.1	33.52	8.01	8.2	4.3	18.14	7.31	5.44	5.28	25.7	3.96	11.39
ENSG00000011105	16.27	4.14	11.48	12.23	6.91	7.61	6.21	6.05	11.03	12.44	12.42	11.79	13.16	18.14	13.63	8.7	18.91	6.44	11.54	7.17	11.78	7.24	11.03	8.37	10.21	12.54	10.89	8.63	9.4	4.85	10.81	15.96	12.06	21.03	7.43	10.6	4.33	8.6	9.3	10.51	18.1	16.7	16.15	12.29	8.57	9.68	4.7	11.8	8.84
ENSG00000011478	19.38	22.28	25.72	17.8	21.13	30.08	19.6	23.49	17.39	25.96	32	19.32	17.25	30.82	18.31	20.72	21.41	9.37	26.87	18.78	22.16	17.4	24.75	18.27	19.64	26.48	34.87	21.98	25.08	17.65	22.39	24.69	33.65	26.8	20.43	17.36	23.95	18.77	20.31	21.18	16.94	16.41	21.55	8.95	29.34	8.81	25.3	17.18	17.69
ENSG00000011485	125.99	181.24	130.22	107.56	231.21	169	152.67	182.43	139.49	197.44	184.37	178.42	133.68	236.77	136.98	160.87	167.11	121.47	139.82	133.3	159.79	147.89	146.52	123.99	213.14	156.17	212.39	136.05	169.86	168.83	141.32	147.03	163.51	162.31	152.64	148.49	125.73	130.98	108.62	186.2	115.29	164.4	128	109.61	139.5	102.23	113.86	161.89	117.43
ENSG00000012963	25.91	26.15	35.1	35.7	21.56	22.76	22.12	37.48	49.86	44.29	29.81	70.23	20.25	26.2	30.9	48.98	57.45	25.67	41.89	42.86	44.05	56	41.62	32.68	50.78	31.08	25.11	28.25	25.87	35.9	50.79	28.12	32.2	22.46	34.21	46.78	28.48	26.23	45.87	52.13	66.28	43.51	30.66	42.01	40.66	37.24	20.87	42.27	22.66
ENSG00000012983	46.41	34.66	14.24	41.82	7.87	20.79	37.83	32.5	33.57	8.55	27.72	41.66	31.68	4.27	15.77	24.46	7.9	33.43	38.92	41.42	17.09	26.3	28.63	28.51	8.77	18.87	5.38	31.82	4.94	13.2	9.65	30.65	21.81	3.84	41.51	29.98	32.37	25.07	42.14	17.71	31.39	32.65	32.58	22.45	38.69	23.41	31.49	26.72	29.44
ENSG00000013583	62.34	68.14	72.77	88.82	57.6	79.15	68.45	87.9	58.98	66.74	71.4	65.66	79.44	74.47	71.29	80.28	90.57	102.79	90.61	89.24	78.08	54.11	56.34	85.87	84.52	103.34	93.85	75.73	84	78.18	86.8	117.51	84.71	92.68	79.86	71.89	77.12	118.81	89.08	83.6	58.2	56.78	94.52	52.98	107.59	71.89	91.78	54.78	71.96
ENSG00000013563	10.39	20.33	18.61	10.73	14.56	19.09	20	14.16	20.97	23.3	28.52	20.71	34.66	28.82	31.29	27.76	38.73	35.79	46.58	37.74	43.1	26.7	27.43	41.97	40.97	33.04	34.4	27.76	42.15	22.7	40.87	42.02	37.05	64.62	27.54	34.1	44.08	49.59	20.78	14.19	15.89	26.38	55.12	0	34.62	12.75	28.04	25.5	38.79
ENSG00000014919	20.98	22.62	22.37	10.84	12.6	13.22	9.97	19.92	18.15	16.8	17.43	17.55	14.67	12.69	17.52	17.22	21.82	21.74	19.86	23.23	18.4	20.91	25.14	15.74	21.79	14.61	20.4	13.83	14.28	21.69	16.42	15.15	12.22	18.64	18.4	20.57	19.73	11.2	23.98	14.74	18.99	18.18	18.63	24.9	20.84	14.72	21.89	22.53	17.91
ENSG00000015532	9.78	11.31	24.37	15.1	9.61	19.33	20.07	17.93	13.2	17.02	15.9	14.45	20.41	20.09	19.83	19.29	18.92	18.84	17.09	23.85	18.81	14.03	15.71	20.71	16.62	21.45	20.1	20.65	21.42	21	16.49	20.92	21.99	22.54	20.32	11.88	23.29	20.72	17.73	16.58	17.09	21.7	17.18	19.61	17.4	15.18	14.56	17.18	13.1
ENSG00000068438	68.18	55.72	78.3	39.74	34.31	23.13	51.4	21.45	39.1	29.41	37.27	52.27	28	30.63	22.3	33.64	52.15	34.24	32.72	22.87	38.3	28.24	39.1	25.43	33.61	40.03	61.75	30.58	33.31	31.51	23.58	35.36	39.19	41.01	35.12	34.44	27.62	13.06	29.97	42.98	22.92	20.72	38.17	0	39.52	21.46	39.97	41.84	23.5
ENSG00000017797	24.62	25.7	48.77	17.53	17.64	21.42	27.87	33.57	43.6	30.6	44.01	43.56	46.38	23.25	35.77	48.04	44.59	61.33	51.85	57.26	49.59	55.86	55.58	60.68	50.17	50.47	33.22	50.25	30.12	49.99	45.44	54.23	43.21	31.22	61.38	59.04	53.8	32.03	45.97	46.19	42.32	42.39	40.57	75.02	60.42	44.67	46.65	42.56	43.53
ENSG00000059915	349.14	593.31	175.21	328.16	855.66	474.88	426.79	449.03	487.39	693.23	441.17	312.85	452	647.72	717.15	376.97	497.17	608.77	457.34	378.55	461.72	348.06	375.03	554.58	437.54	529.75	468.74	482.72	739.22	452.88	510.08	590.17	379.36	595.63	362.69	376.64	458.94	458.66	386.04	359.08	541.34	302.69	241.29	288.35	439.28	639.45	350.39	445.48	719.48
ENSG00000019505	141.86	151.59	64.38	63.41	183.83	36.61	32.22	43.41	112.03	114.54	64.36	99.28	34.22	68.48	69.25	96.04	132.09	63.57	85.55	65.98	87.48	120.7	133.18	37.7	127.43	74.86	104.86	56.98	71.19	102.29	119.06	83.75	45.83	96.37	82.69	84.3	76.01	27.74	66.3	99.55	51.24	101.06	54.3	133.58	58.84	66.04	27.23	100.98	33.91
ENSG00000021488	4.41	1.23	2.96	11.02	0.26	2.03	5.79	1.88	2.06	1.86	5.7	1.65	1.47	0.32	1.56	1.18	0	1.2	1.72	3.47	1.47	0.81	0	0.89	0.54	0	0	1.07	0	1.21	0.93	1.49	3.37	0.39	1.23	0.33	1.94	0	0	0.6	2.41	3.11	3.35	0	3.52	2.26	7.71	1.02	2.47
ENSG00000022355	35.35	36.89	2.46	29.22	42.11	51.96	69.29	108.43	193.97	65.73	146.91	194.63	95.93	63.65	83.91	208.76	108.36	145.72	128.63	187.51	211.58	360.24	353.19	99.01	183.82	124.9	94.08	143.7	53.63	287.38	112.57	177.94	188.5	71.62	236.05	209.58	172.39	46.46	155.2	174.11	162.18	364.39	147.19	357.31	150.58	164.88	77.07	214.72	78.32
ENSG00000022277	39.46	55.41	64.41	78.53	49.99	55.43	60.17	61.58	51.21	76.7	53.26	70.79	67.11	91.67	76.44	71.24	76.6	77.61	67.7	72.22	65.21	69.12	61.57	75.11	86.46	84.78	92.93	74.99	100.88	99.16	78.86	78.64	91.15	84.17	99.83	91.6	73.91	83.73	55.63	74.74	83.54	68.3	68.61	80.15	68.11	65.31	74.62	60.81	94.32
ENSG00000023287	63.63	41.62	6.05	37.09	22.95	25.56	41.36	52.82	60.09	16.09	45.58	59.55	71.8	12.72	37.56	68.65	11.75	83.75	71.34	83.08	53	98.26	108.22	78.01	26.71	34.35	9.44	64.79	13.46	46.84	22.67	72.95	61.12	11.4	75.83	69.92	72.21	30.83	54.79	51.64	60.92	70.11	48.93	84.85	77.09	61.33	49.74	70.84	167.17
ENSG00000023516	35.7	37.98	4.16	12	44.82	14.19	20.42	23.75	77.72	12.53	24.47	33.48	17.56	18.73	20.26	37.85	24.22	46.85	40.18	40.5	35.55	82.92	79.71	19.94	43.43	21.17	16.77	15.37	18.03	47.17	29.61	35.81	19.72	24.56	41.71	37.68	27.95	9.88	59.39	28.78	27.14	38.91	20.68	98.28	25.99	31.71	11.61	39.45	8.89
ENSG00000023734	63.45	53.69	48.64	94.5	33.25	47.9	36.62	53.77	72.97	71.15	53.18	62.8	61.04	31.54	41.31	64.62	61.5	64.06	68.2	61.06	58.06	63.81	72.98	47.8	73.96	84.34	55.53	59.16	38.12	86.18	76.14	67.06	71.06	48.76	78.95	67.56	57.2	46.27	53.41	66.98	51.7	68.71	53.04	53.43	55.66	48.41	51.73	64.71	49.95
ENSG00000027847	31.94	35.08	40.19	28.29	37.84	78.82	42.33	48.22	24.8	47.33	39.06	46.04	37.56	74.61	46.89	37.8	50.23	37.24	42.7	43.66	47.71	36.3	48.19	38.71	52.86	46.44	59.61	56.54	60.38	46.74	54.5	34.61	50.37	42.98	58.57	39.49	72.77	59.67	35.86	48.61	42.87	41.2	42.2	33.17	50.91	38.28	39.84	41.3	44.31
ENSG00000031003	36.74	42.89	12.11	42.72	31.86	23.55	29.63	33.26	57.15	14.01	32.66	40.57	18.57	8.58	18.74	30.79	21.29	36.24	39.88	32.18	33.76	48.06	39.81	12.11	21.59	22.18	9.08	34.56	7.26	35.96	20.32	24.57	34.94	11.49	36.41	39.12	25.11	11.96	41.15	27.94	27.74	61.04	31.01	37.85	37.48	37.76	12.51	25.43	21.51
ENSG00000033100	35.18	27.85	40.97	40.79	57.77	59.9	49.01	55.32	43.49	58.19	61.65	50.85	42.77	70.98	42.7	48.21	47.49	26.53	38.84	47.08	40.46	43.14	48.69	39.96	49.1	47.55	56.39	55.85	54.08	43.19	48.74	46.96	56.08	50.51	42.76	36.38	42.6	44.53	32.24	51.56	41.4	40.49	40.55	27.49	52.08	36.77	51.31	50.44	33.82
ENSG00000033122	56.36	34.94	6.69	23.03	29.77	19.81	23.9	28.76	30.88	11.39	19.11	20.76	13.55	11.35	9.92	19.83	16.04	18.92	18.56	11.02	15.92	22.8	20.77	7.92	11.91	9.35	4.25	10.72	6.79	9.85	10.82	8.73	6.9	6.97	12.02	11.81	9.22	5.52	17.21	19.99	11.32	13.34	15.07	30.54	15.62	15.76	14.45	19.12	6.8
ENSG00000034713	499.65	537.07	457.77	650.65	255.85	593.66	512.74	592.59	574.05	615.31	515.9	578.68	619.23	628.88	628.92	662.16	687.02	595.81	752.6	508.45	628.59	501.54	474.86	613.87	592.71	721.7	663.22	866.92	708.48	762.76	728.34	646.08	624.63	553.11	659.53	819.84	640.93	715.99	498.08	570.87	630.09	535.65	701.5	644.53	569.96	651.63	583.9	481.59	777.05
ENSG00000052841	24.76	16.04	11.13	24.83	10.43	15.86	20.26	17.22	12.49	6.6	15.05	13.44	16.58	4.73	9.9	12.19	10.62	15.3	13.77	15.2	14	12.96	13.56	20.21	9.07	8.32	5.05	12.15	5.19	9.51	8.96	12.23	12.66	7.67	15.19	10.83	11.91	10.79	23.4	10.72	14.36	18.13	21.41	9.17	13.93	12.64	16.97	11.13	12.45
ENSG00000037757	45.5	58.52	52.31	21.94	17.54	40.13	50.97	38	43.11	41.46	40.42	27.78	38.47	22.59	37.89	20.67	33.93	32.18	43.47	39.13	30.21	29.52	30.39	34.01	12.9	23.15	23.44	24.32	29.7	26.1	24.3	27.61	26.28	32.35	29.2	19.01	24.63	29.28	33.81	22.37	22.87	39.16	46.91	9.45	44.18	28.86	34.68	39.09	27.19
ENSG00000038219	24.74	19.91	3.3	21.1	20.28	13.59	23.85	17.61	33.44	7.37	18.44	24.74	18.14	7.94	10.72	25.19	9.01	24.32	29.82	23.62	22.56	34.12	32.32	14.28	15.32	12.6	7.07	20.78	6.97	18.22	9.27	18.21	17.98	9.28	22.35	18.5	20.79	11.96	25.43	21.68	21.22	34.52	17.7	30.87	23.74	20.69	15.13	23.52	14.62
ENSG00000059588	24.07	31.37	3.96	24.01	2.71	23.18	40.44	31.23	26.91	6.89	22.63	22.25	18.02	0.58	8.7	24.13	8.02	19.63	49.96	28.95	24.46	23.4	23.61	17.3	4.09	16.19	2.81	29.84	3.05	6.62	11.38	36.15	29.66	2.83	33.53	20.81	31.18	31	23.52	23.3	19.73	20.98	32.01	15.86	22.13	26.22	15.92	31.06	27.27
ENSG00000041357	138.72	108.02	127.63	172.71	25.45	154.84	177.69	167.42	123.21	83.54	129.45	143.88	109.73	63.61	84.47	152.68	93.41	65.59	139.43	114.5	139.85	116.21	107.89	102.95	94.22	165.57	48.4	160.77	58.74	154.37	112.04	195.38	210.12	40.91	178.91	164.38	111.86	146.73	78.1	134.17	124.83	144.98	149.56	85.38	126.27	128.66	101.8	122.32	162.7
ENSG00000043462	1.51	4.79	9.93	27.44	1.41	4.82	11.65	8.94	6.58	6.5	8.14	7.03	21.09	2.36	18.93	6.47	12.17	10.97	11.01	11.72	10.04	9.38	13.16	11	12.67	10.26	8.9	17.64	8.9	11.02	12.47	14.96	13.02	14.7	13.5	8.43	7.38	24.7	27.95	11.29	14.98	5.69	17.43	16.76	11.4	17.33	15.37	6.5	22.59
ENSG00000011465	36.64	95.75	40.19	119.51	51.72	85.75	307.33	63.22	80.38	63.32	51.21	56.64	65.22	38.43	145.73	60.76	144.99	77.57	271.18	80.79	157.88	60.05	62.26	103.93	70.41	73.57	29.17	75.58	368.39	60.05	255.97	110.93	36.07	526.34	72.62	64.28	53.83	156.46	100.43	67.41	166.66	29.12	536.97	52.82	41.18	89.96	117.78	32.58	195.49
ENSG00000048544	17.33	9.69	7.16	19.28	8.72	18.61	15.86	29.98	22.36	19.43	13.78	19.26	15.42	14.01	21.72	23.51	18.93	17.4	21.83	17.43	24.77	24.14	19.87	25.84	29.56	15.82	14.71	36.27	9.41	25.48	22.47	21.57	28.97	10.42	30.49	20.68	18.72	16.6	17.52	23.3	13.98	24.82	21.82	33.22	18.54	15.27	18.62	15.54	27.87
ENSG00000030582	21.41	36.61	88.79	53.53	53.18	74.21	71.97	47.55	36.87	76.85	59.69	51.83	69.15	77.9	63.74	55.27	59.1	45.72	46.76	58.4	66.62	49.13	44.86	59.82	52.78	46.18	71.15	66	81.18	52.48	55.37	91.17	56.95	152.25	56.68	59.9	56.94	96.01	108.05	70.2	55.61	68.03	126.16	25.42	81.92	48.07	113.46	51.06	57.58
ENSG00000041988	45.99	33.24	47.56	34.77	30.4	35.45	29.06	36.71	23	28.93	42.76	40.25	40.93	47.82	38.16	29.38	33.46	21.97	26.24	32.06	26.81	18.12	20.91	44.41	29.31	32.34	30.54	42.51	37.21	40.44	33.41	54.46	54.11	31.1	41.32	34.82	33.48	54.02	26.28	26.96	32.35	31.65	31.29	18.64	34.46	29.38	37.04	30.97	45.24
ENSG00000049245	21.32	23.85	14.33	29.38	7.47	5.88	29.86	21.81	16.56	28.4	32.72	34.53	30.84	9.34	24.56	18.52	9.47	29	31.18	25.83	23.01	11.75	26.5	23.69	21.02	11.3	15.69	31.08	11.29	20.39	25.47	16.17	25.35	24.64	37.19	35	23.4	30.98	41.13	17.47	23.3	34.6	37.18	33.22	37.08	17.45	52.48	24.53	43.8
ENSG00000049541	18.2	17.39	21.74	18.28	17.01	17.28	18.58	11.89	17.43	13.61	14.21	13.23	11.47	18.6	19.88	16.62	12.93	15.4	13.6	6.98	12.59	11.88	10.37	14.71	13.46	15.44	15.63	16.21	12.31	19.47	12.79	14.83	15.46	16.17	16.08	15.39	12.87	15.74	15.6	15.74	7.29	13.27	13.8	9.45	19.78	11.17	11.08	9.31	11.33
ENSG00000050344	23.24	24.26	6.94	37.09	11.58	13.67	20.07	23.24	12.51	1.3	7.01	9.07	9.31	1.13	4.94	7.25	5.78	3.65	9.97	5.44	7.97	4.55	7.7	6.26	3.82	5.26	1.43	4.14	1.64	1.48	3.05	6.53	8.16	0.83	6.05	3.93	4.31	6.75	9.52	9.31	5.76	5.47	8.46	4.83	4.04	5.39	4.92	3.8	8.68
ENSG00000051620	43.13	41.65	60.09	89.13	12.21	24.98	26.53	7.13	4.06	13.19	9.29	3.26	29.07	22.9	27.78	13.97	8.35	22.75	13.25	24.06	11.28	5.76	8.12	29.57	7.09	12.19	9.62	16.51	31.36	17.85	22.04	43.18	24.86	25.09	15.32	13.26	32.89	49.91	25.39	10.71	28.55	14.01	28.53	21.72	26.51	21.39	26.56	4.81	41
ENSG00000053438	1283.7	787.54	1317.5	977.02	1006.35	504.37	271.23	302.15	361.03	780.52	207.87	273.22	128.55	423.73	342	266.73	263.48	226.25	245.79	112.93	209.25	178.42	169.3	68.97	221.73	264.51	219.87	258.44	303.54	222.4	293.4	137.25	122.67	427.14	161.23	233.21	192.15	76.32	101.32	319.27	163.55	240.88	368.35	163.67	110.37	263.31	271.05	276	181.46
ENSG00000054803	6.66	6.71	7.96	10.1	7.47	6.86	13.06	43.61	34.78	16.44	55.11	43.17	18.98	49.81	82.17	66.96	106.01	34.8	67.56	54.24	128.3	69.82	88.6	34.46	79.5	79.12	91.22	94.55	57.38	90.28	110.86	95.25	47.99	63.48	71.4	50.12	46.02	40.94	29.71	86.65	103.67	42.12	46.88	88.59	37.08	78.53	32.16	68.7	47.78
ENSG00000013297	5.18	8.68	27.05	15.16	2.42	9.51	25.37	5.29	4.82	196.67	102.02	377.31	19.58	22.68	9.17	11.07	13.79	152.1	37.35	115.38	12.03	27.88	10.45	25.1	37.01	132.82	46.67	26.41	12.79	42.42	58.2	48	79.14	80.06	73.68	234.87	77.27	111.76	8.88	9.19	26.02	70.86	65.94	10.75	27.76	6.36	10.69	41.3	44.47
ENSG00000054965	89.01	107.52	108.93	37.09	167.9	64.62	55.39	74.16	134.49	96.12	43.31	86.52	71.38	93.05	113.69	76.94	114.72	113.19	60.84	94.76	53.98	118.9	119.47	60.38	93.71	47.53	84.1	42.71	83.76	55.83	83.99	40.01	50.76	73.43	60.1	66.25	68.81	33.75	104.87	54.03	66.26	90.54	49.98	150.65	73.88	79.14	40.47	84.28	44.32
ENSG00000054967	3.84	6.87	28.45	20.65	6.1	2.26	10.22	11.53	7.64	6.89	3.48	13.79	8.21	14.81	10.35	7.39	6	7.25	8.39	8.19	8.16	6.4	11.94	11.18	11.36	11.73	9.61	14.19	18.44	7.56	12.53	17.1	22.97	11.47	9.43	14.22	14.84	15.95	15.37	8.82	12.76	17.78	17.71	15.96	7.13	7.55	12.2	9.9	5.74
ENSG00000004897	15.73	10.52	5.72	8.48	9.59	9.05	8.62	10.72	12.11	5.75	9.28	12.1	8.22	4.59	3.63	12.79	6.56	10.91	13.33	12.42	10.9	15.07	18.69	7.74	12.81	7.83	4.28	12.96	5.31	14.01	7.69	14.99	11.61	5.35	15.27	12.86	8.61	7.38	13.87	9.34	6.87	13.7	17.21	29.83	11.3	9.79	6.3	12.38	4.6
ENSG00000057294	0.45	2.99	0.8	0.61	1.46	0.66	9.05	1.82	2.77	1.25	1.73	1.11	1.98	0.78	5.37	2.14	2.85	6.14	2.78	1.08	1.48	1.75	2.22	1.08	1.76	0.76	1.31	2.6	2.52	0.97	4.26	1.2	1.51	5.39	1.99	1.06	2.09	0.37	1.78	0.97	7.01	1.51	10.27	5.56	0	4.38	0.57	1.91	2
ENSG00000133597	64.41	78.51	60.26	48.8	87.07	66.28	51.71	74.06	52.55	104	89.05	69.32	38.97	118.1	56.59	63.8	76.54	49.84	57.59	57.83	60.72	52.35	53.09	48.57	83.82	84.11	92.59	67.18	89.39	61.69	70.71	72.09	65.05	65.33	51.52	73.3	60.56	49.91	54.23	78.82	46.16	67.85	32.29	53.51	61.97	40.76	73.35	60.34	51.31
ENSG00000059804	49.83	45.73	77.31	54.11	79.98	45.79	57.65	46.53	67.64	99.92	52.14	81.52	74.72	70.23	49.9	66.01	61.55	44.01	59.14	60.62	84.15	92.03	91.2	39.83	102.54	116.68	93.28	50.01	106.28	106.23	156.49	69.03	44.9	158.28	53.81	70.81	51.04	55.77	84.82	63.33	41.66	83.46	57.16	92.27	59.97	43.44	61.92	75.45	32.37
ENSG00000060140	0	27.41	0.48	6.09	6.76	7.68	10.13	15.34	25.46	11.26	28.56	30.43	19.31	16.9	8.54	35.22	31.96	11.08	32.59	24.14	28.28	25.97	34.95	14.93	30.11	23.85	18.93	16.4	9.07	24.15	28	24.38	10.92	16	26.01	20.63	14.11	6.67	35.36	35.12	5.62	14.51	22.42	13.35	28.88	17.1	13.27	28.6	9.6
ENSG00000088256	102.31	113.31	132.18	73.86	188.46	73.76	85.4	116.02	145.46	167.13	81.99	107.85	99.8	156.84	182.64	103.06	135.54	134.87	95.89	114.38	98.62	102.11	98.4	103.33	106.69	99.28	147.69	56.4	145.1	83.83	114.45	92.2	65.49	154.56	77.41	91.6	96.73	69.42	111.88	95.66	143.58	120.48	72.19	57.22	93.51	149.74	79.97	118.92	119.03
ENSG00000060642	11.22	20.07	21.44	10.82	15.72	34.63	32.98	27.53	15.33	21.38	14.49	19.01	23.96	35.37	36.57	31.18	19.12	21.16	27.99	30.43	20.85	23.07	9.76	45.32	26.54	24.73	23.11	23.98	41.17	31.86	27.74	15.13	22.86	17.54	36.31	20.09	24.95	18.63	21.8	24.51	29.41	22.79	28.57	27.96	29.91	20.2	35.62	15.14	30.16
ENSG00000061794	20.71	18.66	18.55	15.85	5.91	18.6	11.28	22.75	22.87	18.06	14.12	21.79	11.26	10.08	12.23	19.06	21.24	18.36	20.64	13.93	20.62	19.72	20.73	18.59	19.28	15.61	17.78	25.72	9.74	18.85	17.46	19.39	21.88	8.18	17.34	21.98	19.53	18.15	14.47	21.37	15.08	30.52	14.65	28.68	13.34	18.83	13.15	21.18	15.47
ENSG00000062725	13.78	10.79	6.86	12.98	4.94	7.77	9.01	7.2	11.99	6.7	7.72	12.59	10.63	3.49	7.49	13.26	5.22	10.33	5.02	10.24	16.17	18.89	18.55	6.68	8.83	8.57	4.4	14.29	3.57	10.54	7.75	8.67	8.43	3.59	9.49	13.71	9.68	8.39	10.24	10.29	15.26	15.3	10.03	17.18	8.79	9.78	11.67	6.2	6.18
ENSG00000063177	1333.82	963.3	2163.16	2009.12	930.57	1514.83	1196.26	757.91	598.43	897.77	756.65	576.56	905	1022.62	999.33	604.06	680.08	727.48	680.57	549.58	559.67	380.19	392.82	958.88	496.45	927.24	758.85	945.71	1136.01	682.28	721.05	1059.55	933.05	900	540.71	644.21	732.62	1328.15	650.73	618.2	943.2	575.56	909.28	428.97	780.5	847.33	1101.26	539.86	1757.94
ENSG00000063180	193.12	293.29	76.23	328.06	357.88	915.45	725.29	1226.14	1041.15	1188.33	1245.01	911.76	1430.15	1839.81	1943.73	1288.06	1419.76	1779.61	1407.08	976.42	1426.05	1078.11	1061.02	1636.42	1347.3	1505.89	1426.63	1819.48	2010.89	1475.6	1367.32	1396.98	1367.54	1314.77	1147.58	1048.21	1149.39	1249.35	833.82	1205.69	1241.51	966.6	872.92	1043.65	1338.48	1765.24	1397.88	1299.99	2568.18
ENSG00000063241	26.58	46.23	63.48	70.18	55.88	96.59	80.63	61.4	74.3	76.16	79.18	64.01	106.43	150.9	134.97	73.39	70.26	76.05	82.9	85.84	107.83	48.43	44.03	84.7	80.79	110.19	114.09	87.53	109.42	94.37	111.2	79.64	112.35	98.67	78.28	76.68	93.33	93.16	91.98	86.31	98.07	80.83	66.26	98.15	98.42	93.04	76.89	65.23	152.19
ENSG00000012124	0	0	0.38	0	0	2.1	0.89	0.87	0	13.88	18.46	57.9	3.11	1.48	1.8	2.04	0.9	19.35	2.72	14.92	3.16	8.08	3.55	8.72	3.13	23.15	1.64	8.33	0.9	3.82	3.03	5.57	17.04	0	27.11	34.87	19.88	8.43	0.73	3.3	1.94	9.5	3.27	3.96	7.18	3.64	5.24	5.65	20.39
ENSG00000053918	1.76	1.97	4.21	0.81	3.02	1.29	3.7	1.6	4.01	3.95	2.28	1.17	4.7	0.69	2.08	0	5	2.55	0.92	0.57	2.34	2.01	0.36	0	2.6	1.49	0.43	1.14	3.73	1.28	1.32	1.19	1.2	7.51	0.33	2.45	1.72	3.41	3.35	1.6	3.08	1.99	5.7	2.44	1.36	2.88	6.71	3.24	1.75
ENSG00000071575	82.67	126.83	70.26	141.64	115.89	140.24	175.13	156.07	153.43	92.71	93.81	101.41	75.46	95.32	118.67	130.3	93.34	76.12	85.96	39.54	87.25	103.27	77.05	65.09	89.87	54.83	63.18	64.89	53.11	58.48	74.46	43.59	43.2	37.68	26.62	52.51	52.11	24.64	52.7	115.81	120.42	120.83	100.92	66.05	33.79	104.96	41.73	91.7	87.08
ENSG00000068308	62.5	72.28	77.51	71.38	95.59	71.85	64.32	87.76	101.22	126.99	91.45	86.51	79.38	129.77	126.43	89.93	97.12	104.62	97.89	94.97	91.85	83.69	79.65	89.77	105.33	119.59	126.19	105.38	139.48	107.09	111.38	119.57	104.15	109.75	91.81	107.45	104.1	96.68	91.58	102.72	99.44	109.73	71.92	71.01	104.96	105.79	96.34	109.48	126.07
ENSG00000068394	41.66	50.46	70.48	49.42	45.42	52.73	55.09	80.46	61.82	84.34	67.28	81.88	39.13	86.49	72.16	59.37	80.53	70.51	50.53	56.06	66.06	47.59	60.39	48.62	60.46	74.58	81.75	80.96	80.03	78.38	65.03	84.26	67.6	100.36	63.28	66.31	59.59	121.04	89.93	78.39	93.04	60.08	94.03	48.07	83.16	64.39	52.91	53.96	100.25
ENSG00000021776	13.94	7.59	9.33	15.5	9.12	8.47	15.23	8.87	8.66	5.53	8.17	8.25	10.75	4.02	7.25	7.65	7.79	12.81	11.02	12.16	8.52	10.01	13.17	13.07	6.97	5.99	3.97	8.13	5.77	8.63	7	8.65	9.35	5.55	8.4	7.88	9.14	10.5	16.58	7.31	14.46	10.7	11.61	10.81	9.48	12.78	12.16	7.3	6.11
ENSG00000070526	0.49	3.53	0	1.34	1.81	7.14	6.46	2.98	7.24	7.89	2.2	3.14	5.18	8.22	12.73	5.97	9.31	3.52	12.49	5.64	9.99	3.09	3.32	5.49	3.59	5.76	1.43	7.08	3.77	3.71	4.36	6.87	3.63	9.32	6.23	1.45	6.25	0.81	6.93	5.3	10.18	4.11	16.78	2.02	3.09	7.15	2.16	2.98	15.23
ENSG00000071655	92.2	104.13	149.75	85.74	171.46	168.07	151.69	157.13	189.02	242.45	196.57	139.67	192.81	267.6	324.06	163.11	197.09	230.74	132.29	148.29	137.11	119.62	119.72	235.41	133.62	151.69	197.45	123.65	207.57	133.47	153.9	169.71	152.2	191.4	102.9	124.93	202.89	153.09	132.25	161.18	238.51	119.68	114.62	68.95	139.48	247.48	135.25	145.96	312.64
ENSG00000071282	0.76	4.28	2.74	13.7	7.5	11.24	11.24	6.78	12.35	9.01	2.96	5.34	6.13	5.81	5.96	5.31	9.78	8.32	10.74	5.56	20.31	3.74	7.13	2.47	8.29	3.89	4.5	8.92	24.83	5.85	12.04	13.41	4.16	19.03	5.12	6.39	9.4	12.7	4.37	7.52	12.03	4.75	38.96	3.18	4.43	2.5	6.8	6.57	15.99
ENSG00000013275	111.16	93.77	174.96	192.09	120.09	178.05	157	152.43	128.14	177.25	124.12	155.29	145.23	198.5	136.59	152.48	142.37	122.58	126.27	145.99	156.98	134.64	127.74	135.5	155.52	182	202.38	154.85	174.13	161.81	168.28	176.32	212.58	175.87	155.98	166.84	154.18	236.31	140.27	162.52	142.63	151.21	190.16	117.45	162.75	114.1	143.22	139.18	171.8
ENSG00000072818	5.24	5.37	3.91	1.2	1.43	1.6	0.92	2.08	1.08	1.71	0.28	1.74	3.11	1.02	2.16	2.1	1.24	0.95	3.74	2.11	1.45	1.07	1.36	2.12	0.43	0.37	0.96	0.85	0.92	0	2.45	1.47	1.48	2.79	0.73	1.3	1.79	2.9	5.24	0.48	3.81	0.99	7.41	1.81	1.77	3.21	2.22	0.27	1.96
ENSG00000072849	15.7	24.46	31.48	26.27	13.1	30.51	29.06	13.76	12.54	18.24	19.57	15.65	30.94	21.62	23.05	14.99	23.9	11.39	24.49	16.3	20.11	9.34	6.27	19.94	18.25	18.07	17.34	17.44	26.13	18.38	21.44	14.37	12.96	16.75	10.02	18.75	16.41	18.63	23.08	12.26	20.59	12.66	27.21	4.66	22.11	21.11	47.02	10.32	28.49
ENSG00000076662	3.92	7.52	8.37	10.42	13.62	23.89	12.56	24.45	12.19	15.4	19.55	13.41	14.46	19.31	17.08	21.87	17.91	11.79	15.3	17.65	18.6	14.54	10.79	18.57	12.99	11.88	19.39	17.97	21.76	18.68	17.96	20.78	17.52	25.1	13.45	10.37	19.68	22.34	9.61	22.05	17.14	14.55	16.66	4.66	18.19	12.84	13.17	13.41	18.42
ENSG00000077063	50.96	23.88	12.17	24.41	15.2	24.26	26.73	27.68	21.71	15.42	21.32	28.22	20.73	7.28	14.45	19.72	13.79	24.53	20.44	20.69	21.16	22.65	19.1	13.86	17.79	15.09	10.6	19.18	4.68	12.11	9.55	15.27	21.76	6.1	21.94	21.54	20.07	11.82	25.06	16	19.51	45.2	17.56	27.56	18.76	21.85	17.57	15.98	19.33
ENSG00000077080	226.97	212.58	128.76	147.67	220.95	189.55	153.17	159.89	120.25	144.59	173.12	106.19	97.06	185.2	110.8	136.14	144.18	103.36	133.74	123.4	133.53	108.66	115.56	121.25	104.74	168.96	194.41	165.43	169.09	151.89	116.58	169.62	216.3	132.68	137.57	127.58	178.23	152.32	89.72	156.72	106.35	169.02	117	107.39	152.76	124.87	121.32	147.4	98.89
ENSG00000079432	131.28	123.4	107.14	80.6	162.69	60.55	81.39	62.65	101.89	111.37	55.93	62.86	74.33	83.11	92.62	56.74	80.4	75.63	54.75	68.03	59.37	51.98	51.66	75.94	52.43	63.9	57.97	36.42	80.57	38.77	66.08	73.38	55.71	80.62	42.36	51.9	61.13	95.09	95.47	64.24	93.62	78.17	64.27	33.99	64.73	74.43	50.5	70.4	75.6
ENSG00000079616	39.21	39.78	58.42	37.31	46.09	37.14	51.51	37.75	30.64	38.76	36.3	28.8	29.5	40.6	30.65	30.68	29.57	24.92	34.05	33.29	25.49	23.16	20.85	32.99	25.31	30.85	24.39	32.61	37.37	31.36	34.08	34.07	31.31	30.75	30	26.78	33.83	36.92	32.8	29.59	30.38	33.99	34.57	18.47	35.38	25.47	29.78	29.77	34.42
ENSG00000047188	26.99	17.91	4.69	23.03	8.19	10.66	17.49	17.85	23.52	6.66	15.74	15.46	11.29	3.65	7.71	18.52	7.44	15.49	18.53	16.1	19.79	23.67	24.78	13.18	12.11	7.52	4.45	14.48	5.4	14.85	10.3	14.26	10.54	5.58	16.75	14.67	13.32	8.7	20.26	17.17	17.43	20.69	20.03	31.8	16.81	20.11	10.49	19.53	10.23
ENSG00000064545	28.6	31.99	53.25	36.7	29.35	53.18	53.4	45.5	37.28	40.25	79.72	37.45	55.9	43.89	44.51	38.67	39.43	34.58	35.43	34.24	46.54	29.66	29.97	44.87	34.01	44.71	37.15	55.6	36.81	29.11	45.08	39.33	52.58	46.25	40.69	32.14	51.54	48.43	39.11	44.74	37.25	44.32	52.04	23.3	48.76	32.13	76.94	40.96	44.4
ENSG00000065970	23.79	27.25	26.33	25.98	40.12	16.63	11.78	12.26	30.64	27.65	13.49	21.68	16.01	24.74	15.21	16.75	20.19	21.04	14.93	13.49	16.56	22.73	16.94	9.85	16.02	16.73	15.8	14.66	17.2	14.26	18.26	9.78	9.85	24.34	11.33	11.43	9.17	7.23	19.9	15.53	10.65	19.65	16.19	12.05	14.12	18.52	12.53	20.29	6.93
ENSG00000066455	30.89	25.71	11.64	49.91	14.95	23.79	24.72	36.61	30.62	15.47	24.47	28.96	35.35	13.1	14.07	26.93	19.07	25.35	38.72	32.43	26.61	29.53	32.22	27.64	23.03	24.02	10.83	27.88	5.45	30.74	17.98	36.95	29.23	10.98	34.48	37.54	27.34	37.86	30.06	30.94	30.54	30.72	33.68	50.42	27.29	28.59	26.63	21.44	30.77
ENSG00000068971	85.97	107.94	66.65	114.8	154.69	116.4	87.11	102.82	89.02	131.92	129.6	98.45	102	117.59	99.4	79	64.27	76.04	83.51	100.1	80.1	90.09	85.74	102.37	96.65	101.69	116.54	99.67	107.51	99.28	70.78	97.12	123.47	80.42	91.74	95.88	94.01	59.48	78.44	83.22	92.27	96.61	73.63	46.99	126.32	73.44	76.62	103.19	103.64
ENSG00000068976	3.19	4.64	2.86	4.62	7.61	29.34	35.1	26.78	7.14	5.73	20.63	3.66	43.2	41.59	29.87	21.34	19.73	25.71	15.19	22.9	8.06	4.07	3.37	25.8	11.65	8.94	29.61	25.45	30.65	13.43	14.54	5.81	18.01	15.44	8.38	4.77	24.48	7.69	11.86	10.82	56.66	12.26	21.89	18.57	14.81	29.53	19.06	18.81	52
ENSG00000069399	11.05	4.25	37.13	9.99	3.55	12.7	6.77	4.24	2.58	3.1	7.14	3.1	9.84	2.02	6.36	2.22	5.4	3.01	3.23	8.37	5.96	3.72	2.58	21.21	3.41	12.89	4.58	3.36	27.79	2.64	18.64	15.37	7.04	14.24	2.7	4.54	5.66	34.99	13.03	2.26	4.23	3.9	17.6	20.09	6.81	5.65	13.6	3.39	5.16
ENSG00000069943	14.55	16.82	4.35	21.39	3.4	33.16	34.3	27.45	15.67	7.89	23.5	19.34	21.58	5.38	10.66	19.96	8.61	12.67	20.81	20.21	18.68	15.44	14.16	23.91	7.89	12.34	5	30.17	8.9	15.63	13.63	30.74	30.65	5.52	23.55	17.95	19.87	20.94	18.3	15.11	14.84	19.71	26.18	6.05	22.49	21.04	22.49	17.56	28.26
ENSG00000070404	4.82	3.59	44.11	8.85	3	15.34	4.5	7.66	7.98	6.3	25.93	8	12.86	6.56	6.83	6.87	4.56	6.99	7.51	21.78	4.26	2.36	2	10.38	0	10.89	2.36	12.48	10.2	1.75	3.61	15.16	6.54	7.99	2.69	13.42	18.79	26.66	3.67	8.77	5.61	9.06	14.61	0	4.65	1.31	4.08	15.76	2.4
ENSG00000070886	1.9	6.19	4.54	13.08	8.28	5.58	3.55	1.94	3.93	2.31	2.86	3	2.53	3.33	2.92	3.04	3.15	2.75	2.22	2.3	1.26	1.7	1.77	1.02	4.21	2.95	2.33	2.15	3.57	2.77	2.85	4.69	1.29	2.7	2.65	2.27	3.52	2.89	4.7	3.46	3.32	0.71	2.3	2.63	4.22	2.33	3.42	4.27	1.42
ENSG00000071246	136.08	118.86	167.35	39.52	153.98	44.34	50.47	39.11	60.32	59.39	41.82	40.69	28.8	42.96	42.22	33.81	40.75	32.02	39.58	30.65	37.6	38.17	36.1	14.86	22.48	24.33	21.11	30.02	33.22	13.66	32.66	16.86	21.99	37.65	23.81	35.56	31	8.55	26.06	30.54	41.14	37.78	41.49	45.84	22.17	43.34	19.62	38.82	26.37
ENSG00000073350	3.22	2.83	2.2	3.48	2.15	5.41	3.54	3.45	2.57	4.9	4.16	6.18	4.5	1.88	5.54	4.42	3.92	3	3.23	5.34	2.14	1.58	3.43	6.69	2.49	3.12	2.03	4.02	3.89	1.76	4.65	4.96	4.68	4.25	3.59	4.94	4.57	3.43	3.15	2.26	4.02	2.59	9.48	1.91	3.46	4.14	3.21	1.97	4.12
ENSG00000072506	62.68	67.22	142.97	94.85	78.26	86.86	71.94	70.75	54.9	72.02	60.41	56.32	73.15	90.01	75.73	52.18	45.25	67.09	56.09	52.77	34.79	36.73	36.39	68.91	57.24	52.29	56.72	78.89	83.4	53.33	70.46	63.05	68.41	85.47	57.34	53.98	63.15	125.41	55.2	50.52	96.99	48.71	85.37	21.34	52.41	68.11	67.21	39.72	107.45
ENSG00000073849	60.85	45.12	45.03	15.95	52.23	22.85	23.62	20.29	48.9	51.55	19.66	28.35	30.61	22.79	32.81	21.57	50.74	33.59	18.57	16.98	37.33	48.9	43.56	21.38	34.89	22.44	25.31	25.07	33.61	26.02	26.02	19.62	16.18	62.07	23.99	24.87	20.52	27.46	48.39	35.05	18.5	24.27	40.52	38.47	25.69	15.16	27.3	27.6	13.83
ENSG00000075336	43.25	30.83	23.89	72.24	14.15	79.47	75.7	60.44	41.65	47.89	60.77	47.41	59.65	26.52	46.74	61.26	46.07	55.69	64.92	48.71	57.42	46.58	54.41	53.29	29.85	49.51	38.19	91.41	30.52	68.51	46.79	53.95	72.72	23.83	51.29	64.54	43.66	44.88	27.19	49.62	62.36	63.46	61.64	31.44	75.2	71.67	96.13	61.04	92.06
ENSG00000079313	24.79	36.3	33.73	30.81	49.56	49.03	46.7	68.82	63.2	78.39	69.19	49.93	57.54	82.39	103.42	53.14	68.61	55.81	41.26	54.36	50.9	41.54	47.48	60.92	53.8	63.72	53.42	36.26	76.3	47.19	51.57	58.07	36.29	51.42	39.37	48.21	51.16	45.2	37.54	56.27	69.69	49.04	35.81	35.04	48	69.02	40.9	66.18	73.69
ENSG00000075975	18.72	22.38	33.93	33.35	18.4	28.47	27.12	29.49	28.88	36.2	37.54	38.61	30.45	30.92	28.82	38.65	44.48	29.97	31.72	44.73	38.15	40.46	24.47	33.91	38.83	41.06	31.36	30.74	28.25	34.21	37.01	36.13	32.46	21.11	33.87	38.92	26.83	25.73	53.13	29.98	31.6	35.34	36.8	32.19	49.77	31.7	34.85	32.88	28.93
ENSG00000076650	16.66	11.64	10.71	14.12	5.69	10.83	12.11	12.67	8.56	7.72	8.9	9.26	11.69	7.11	6.81	11.47	7.28	12.55	9.74	12.57	8.29	9.72	9.16	6.73	9.48	11.14	6.84	9.34	7.24	7.88	9.9	12.96	10.88	7.74	8.58	12.05	9.94	12.24	5.49	7.88	8.96	10.85	10.3	7.99	12.07	8.65	10.38	9.04	13.4
ENSG00000079999	56.08	46.69	99.01	56.69	82.31	62.28	56.33	63.99	59.08	85.44	68.52	71.38	76.48	90.06	97.62	59.62	71.86	70.75	50.86	80.03	61.51	51.33	51.88	53.19	73.02	83.74	83.44	61.01	84.32	70.26	68.86	72.33	67.5	79.74	61.57	80.05	80.27	60.73	61.66	60.27	74.58	75	51.01	50.65	64.3	58.86	37.16	70.32	76.49
ENSG00000079308	2.36	5.28	17.41	9.98	8.43	10.16	16.52	9.42	15.81	16.07	10.67	15.71	18.3	6.2	22.33	7.39	18.43	18.09	20.77	16.25	14.99	7.59	10.68	17.43	10.05	7.29	4.96	6.06	21.77	5.16	20.65	9.09	9.39	58.83	7.99	13.58	16.57	11.75	22.15	6.17	12.67	10.65	34.14	15.4	6.94	12.97	14.13	11.79	14.1
ENSG00000065320	0.49	4.07	13.04	4.68	11.11	5.35	5.09	4.3	5.42	5.98	2.19	2.42	4.32	3.12	9.28	2.33	6.55	6.33	2.27	2.35	2.9	0.95	1.21	1.18	3.11	1.23	0.71	0.47	2.74	0.79	1.91	1.64	0.33	7.93	1.08	1.74	2.56	2.01	3.05	2.65	6.78	3.01	6.77	4.03	1.12	0.4	2.16	4.17	4.35
ENSG00000066583	30.61	30.71	17.21	30.39	15.99	27.14	24.58	20.87	20.7	27.77	18.61	24.23	16.02	12.09	12.76	15.4	17.27	24.17	20.36	18.76	13.15	11.02	7.83	13.1	10.65	11.45	8.61	18.38	16.52	12.3	17.71	15.18	5.51	8.32	14.07	26.87	16.34	12.71	13.38	10.82	18.89	7.62	18.02	3.74	15.13	19.16	16.01	19.34	17.49
ENSG00000070444	38.79	32.02	29.78	14.95	44.66	18.67	20.69	21.72	53.07	36.77	19.69	26.92	23.42	36.68	24.87	29.86	32.14	29.48	28.45	41.16	29.43	31.65	30.7	31.72	32.55	30.15	27.53	17.5	38.13	28	39.71	24.91	19.76	38.74	22.68	27.56	31.35	23	39.85	33.05	23	34.66	23.8	36.45	26.23	34.39	29.03	39.39	22.07
ENSG00000068697	194.43	183.34	458.25	249.65	119.34	274	280.31	191.37	119.37	163.85	136.02	146.77	273.36	183.42	256.82	159.88	204.27	171.93	204.56	173.9	177.97	112.09	122.95	322.57	209.28	146.35	153.25	204.61	261.45	217.46	243.78	193.93	146.94	303.46	170.14	166.19	195.27	348.64	261.03	116.28	277.52	121.42	363.52	253.32	174.72	266.46	309.06	135.55	252.64
ENSG00000072135	11.1	15.35	14.65	8.05	4.37	15.88	19.22	17.12	14.15	9.17	17.36	9.31	15.07	4.77	19.04	13.73	12.03	9.74	17.31	15.56	11.24	7.72	7.98	18.4	3.17	7.43	5.16	17.03	4.12	3.19	7.22	16.14	14.68	11.21	11.08	7.67	15.04	8.73	18.69	12.44	13.27	12.19	12.75	14.56	16.25	12.9	19.66	10.75	13.09
ENSG00000072786	5.64	6.63	17.18	12.26	7.21	10.03	11.42	9.71	9.21	9.31	4.98	6.06	8.71	6.41	11.35	4.76	11.16	9.68	5.55	3.88	6.7	5.81	5.16	3.36	3.66	2.26	2.18	3.46	5.44	2.59	5.67	4	3.83	13.28	5.3	3.54	3.12	8.86	15.59	7.13	12.96	6.86	14.03	3.7	3.61	4.37	8.1	4.91	5.32
ENSG00000073331	5.19	1.45	4.65	2.38	1.01	1.91	2.42	1.18	0.67	1.33	1.82	0.97	2.69	0.51	1.84	0.69	0.77	1.57	3.88	2.72	1.44	2.65	1.21	3.14	1.07	0.73	0.16	1.47	0.76	0.47	2.31	3.21	1.47	1.08	1.45	1.94	1.39	5.74	7.41	1.42	2.65	1.83	6.69	0.9	1.88	1.77	6.87	1.33	2.26
ENSG00000074071	81	83.92	141.56	160.83	106.87	148.85	98.41	112.88	96.95	136.26	140.07	108.63	104.94	212.18	119.02	96.78	129.44	92.46	117.05	125.81	106.76	88.07	73.27	93.36	92.19	133.35	139.39	174.81	116.86	135.35	99.09	169.47	140	126.19	102.38	137.95	133.86	121.65	85.1	128.21	113.48	97.48	119.2	74.23	119.45	108.21	93.05	113.3	117.44
ENSG00000137764	34.78	31.51	18.62	21.89	25.21	38.34	18.89	29.02	32.78	36.64	32.54	32.87	27.75	37.47	29.74	37.5	28.96	31.75	33.2	33.41	32.64	32.59	36.51	27.61	38.13	43.22	53.83	41.37	33.01	37.01	37.07	38.81	41.55	34.53	46.85	44.38	31.58	28.87	27.07	39.31	25.15	35.87	31.64	34.87	43.09	31.89	36.55	35.69	34.04
ENSG00000078237	8.94	8.89	10.68	28.06	7.89	16.79	21.56	18.29	19.13	22.84	19.25	32.18	15.03	16.24	15.49	37.17	18.34	9.37	21.69	12.99	23.08	18.97	25.92	14.45	26.93	32.86	9.5	31.86	9.11	22.25	22.33	24.11	24.97	12.71	32.71	26.09	15.12	12.37	17.03	27.14	26.05	26.35	19.88	16.51	24.76	24.39	10.09	20.12	25.23
ENSG00000003987	27.18	22.8	5.76	12.69	14.55	13.54	19.95	17.04	29.69	15.49	21.25	28.19	12.88	14.85	12.43	31.4	25.53	22.58	33.17	28.89	25.33	41.86	49.03	14.17	23.13	23.43	11.94	20.03	9.59	33.77	25.38	34.29	22.34	12.47	33.03	27.74	29.77	14.2	28.07	27.55	24.52	25.24	21.54	45.54	18.81	24.76	17.82	30.67	10.48
ENSG00000065809	46.48	32.85	28.28	24.16	10.65	5.8	11.67	4.78	8.72	8.85	16.43	48.07	7.8	5.12	6.21	4.22	5.61	28.63	5.47	21.24	7.57	7.73	4.36	10.63	5.19	14.87	3.87	5.11	3.71	10.06	5.91	8.28	20.26	3.74	15.17	52.35	22.07	17.47	8.02	3.83	11.5	11.38	15.95	0	6.61	2.87	5.57	4.84	10.48
ENSG00000065883	39.31	24.97	17.39	27.75	12.13	24.62	35.68	24.49	22.46	11.43	25.56	24.31	23.97	10.35	16.68	28.28	18.27	22.01	28.96	25.51	23.2	21.86	19.75	23.33	20.82	15.64	14.65	23.11	11.13	16.17	18.55	19.64	27.86	11.21	23.29	24.19	25.57	19.54	24.83	19.09	24.18	26.3	23.84	15.12	26.87	20.46	30.67	23.53	15.59
ENSG00000080200	1.32	4.12	1.57	7.25	2.09	5.61	9.4	4.49	3.6	1.48	9.52	8.26	8.2	1.08	3.36	6.19	2.8	9.16	9.24	10.84	6.46	5.28	3.92	9.78	4.41	3.35	1.94	4.86	2.04	3.16	4.73	7.81	4.83	3.74	8.52	5.66	8.16	8.3	12.63	5.03	4.6	6.24	7.66	4.37	5.03	4.95	8.19	4.68	9.04
ENSG00000065308	5.81	6.09	7.8	13.5	3.73	5.87	13.21	11.87	9.02	9.76	12.66	8.32	4.52	5.09	5.66	9.31	5.15	2.63	8.49	6.33	12.53	7.11	11.27	8.21	7.51	3.69	5.34	10.58	7.17	6.74	8.16	11.25	7.89	4.64	4.05	6.06	8.07	6.02	5.39	15.06	6.98	8.19	9.68	6.03	7.99	4.16	2.76	13.36	9.76
ENSG00000065518	300.28	159.8	264.65	416.55	75.48	366.85	301.57	381.18	252.17	312.35	268.93	317.84	359.36	442.64	390.36	388.52	344.16	274.91	363.37	316.04	358.84	247.4	263.76	403.26	394.05	648.05	498.36	559.48	628.46	420.84	429.49	411.91	512.11	341.57	382.54	479.63	432.69	426.39	222.5	310	441.61	300.37	396.87	326.93	381.71	469.45	378.76	330.4	612.52
ENSG00000068912	41.72	54.74	27.9	32.95	25.47	51.52	52.18	78.87	72.91	47.72	66.12	109.21	62.86	38.66	43.36	116.54	79.8	67.79	104.97	106.71	121.86	123.09	117.84	71.91	97.62	89.63	56.08	97.84	40.43	155.27	93.16	113.26	102.78	51.01	143.1	129.82	94.08	82.66	82.01	100.28	74.86	111.44	90.41	131.72	101.24	71.92	63.58	112.29	47.36
ENSG00000075568	34.38	30.99	15.56	26.71	33.83	28.83	29.69	33.86	25.97	18.51	28.77	23.47	24.26	16.54	17.39	26.79	21.73	21.75	23.97	25.97	24.43	27.66	27.38	18.84	21.72	17.47	14.27	19.13	10.26	18.95	19.58	20.32	23.25	18.41	23.92	24.23	22.87	20.75	27.26	29.21	19.32	25.56	25.72	22.02	24.14	19.33	24.43	26.58	16.06
ENSG00000072954	20.82	43.65	33.56	27.24	84.13	76.5	57.57	132.68	138.37	151.73	154.66	161.81	102.81	218.2	146.03	162.99	175.18	59.65	148.53	75.63	185.87	161.53	148.08	59.71	153.92	169.47	199.15	126.43	157.93	149.53	138.05	75.79	127.98	136.89	124.3	113.07	87.72	40.61	86.25	189.35	72.77	199.71	71.33	147.01	110.4	128.61	59.49	179.46	83.96
ENSG00000075089	63.07	43.6	22.27	65.87	13.94	55.33	51.75	53.16	34.55	31.56	33.3	48.32	48.28	24.55	23.07	55.46	30.82	33.45	41.78	46.32	52.22	54.12	39.6	42.74	30.09	60.38	15.97	70.51	16.75	64.83	41.16	64.47	64.96	10.12	61.31	56.67	51.99	29.84	50.77	44.83	52.15	50.14	55.11	59.16	56.6	46.06	53.4	44.94	42.55
ENSG00000078098	0.35	0.79	0.21	0.73	0.33	0.78	1.24	2.17	1.98	2.38	2.51	3.53	1.26	0	1.75	0.57	2.26	0.77	0.55	2.06	1.41	2.94	2.64	0.57	0.35	1.2	0	2.41	0.5	2.9	0.8	5.01	2.88	0.25	4.15	3.38	2.07	1.76	1.42	0.19	0.62	4.39	1.72	0	4.1	1.16	3.82	2.82	6.34
ENSG00000065060	4.3	5.12	10.38	4.5	3.14	3.3	4.84	4.33	7.78	5.87	4.22	4.93	2.66	1.85	6.22	4.79	6.37	7.32	5.24	5.97	4.47	5.95	8.36	4.53	6.82	3.8	2.61	3.09	3.3	4.08	5.25	4.66	3.43	5.58	5.21	7.25	4.59	3.1	6.51	2.65	5.06	7.49	5.21	6.21	4.98	11.01	4.63	5.04	2.51
ENSG00000081087	13.66	9.44	6.72	15.5	8.26	13.59	13.5	11.5	21.97	8.56	18.69	18.42	17.16	7.04	13.1	21.05	13.7	13.41	16.92	14.02	16.01	18.49	17.97	11.69	9.11	11.59	3.55	12.5	4.54	21.07	8.58	24.38	12.56	6.86	15.7	15.35	14.58	14.68	17.45	21.07	25.28	19.05	14.62	20.03	14.44	7.23	18.37	18.74	10.8
ENSG00000081818	11.5	10.78	11.11	2.8	7.43	7.46	7.34	5.3	7.35	4.93	7.87	9.94	12.04	9.48	12.7	10.12	14.41	10.8	8.18	10.49	8.08	14.08	6.09	21.86	9.17	11.76	12.69	10.52	11.93	10.9	11.79	9.12	4.37	10.34	7.74	10.09	4.16	14.04	11.79	9.61	10.94	6.3	8.61	22.48	10.78	8.03	6.01	8.72	5.05
ENSG00000112852	13.14	7.91	13.08	2.79	7.56	3.96	2.12	7.81	8.37	4.91	3.48	5.2	5.7	3.54	4.54	3.24	8.85	2.44	3.68	8.33	7.61	3.79	3.35	3.81	7.47	3.43	5.21	5.57	5.23	5.52	4.55	7.04	2.52	4.79	3.38	3.22	2.56	1.4	5.58	4.42	2.94	6.85	3.27	2.8	2.93	3.86	1.5	5.38	1.51
ENSG00000081870	48.27	33.22	34.37	76.74	9.54	72.33	57.2	45.57	39.22	47.89	43.18	38.86	47.91	46.62	43.42	52.6	38.24	35.02	65.16	43.18	67.79	40	34.61	63.01	36.61	39.36	24.6	63.15	48.48	50.71	60.52	86.38	56.76	38.28	67.35	46.55	61.94	77.07	62.6	56.8	50.3	29.34	94.58	46.28	60.27	54.7	75.46	52.41	52.7
ENSG00000082146	36.62	23.71	15.35	34.52	14.11	32.12	39.14	26.28	19.96	12.61	14.94	18.57	25.73	9.01	19.12	14.08	12.78	18.18	18.54	17.12	13.65	14.16	11.58	17.65	11.09	9.26	9.46	16.86	9.07	10.88	14.08	14.3	14.4	10.51	16.49	18.79	15.79	17.07	20.56	14.39	25.27	17.04	15.2	13.35	21.6	17.88	16.73	14.59	17.28
ENSG00000082438	1.96	5.61	3.91	6.61	4.08	12.67	23.52	16.81	18.43	4.4	6.2	10.65	8.54	3.69	10.05	7.58	6.82	13.14	20.42	10.57	15.64	11	10.57	14.63	4.52	2.59	5.14	11.24	2	6.44	4.29	16.47	9.63	9.15	12.91	5.86	8.3	10.87	12.72	8.82	15.83	12.68	39.3	5.44	7.97	11.78	8.59	8.43	32.26
ENSG00000082458	78.26	95.77	37.39	42.51	122.87	40.76	50.41	50.61	84.18	83	61.54	74.88	34.22	57.98	60.53	67.64	88.93	49.63	57.89	40.08	75.11	85.61	76.13	26.38	91.27	43.24	70.43	37.38	51.76	55.21	71.13	33.77	38.89	51.19	46.92	45.38	39	10.77	58.02	75.01	40.26	68.15	43.12	57.59	46.14	60.02	27.26	59.55	33.4
ENSG00000083720	16.02	43.63	3.7	23.85	28.73	22.41	17.37	39.1	46.87	25.79	28.04	37.34	25.29	12.37	19.41	40.32	24.96	34.86	22.57	31.29	24.36	46.8	38.2	15.45	33.88	16.21	13.31	20.09	11.67	31.05	28.75	31.01	20.01	12.86	34.89	31.15	28.13	12.01	28.94	28.51	20.32	28.58	27.89	36.49	30.55	20.3	23.63	29.49	8.49
ENSG00000083817	8.14	8.35	5.94	7.79	5.29	7.65	7.6	7.71	4.78	7.36	6.72	7.67	6.04	4.49	5.77	7.5	6.43	8.53	6.7	7.01	6.31	5.54	6.47	4.75	7.81	3.45	8.32	7.48	5.11	6.67	5.34	4.58	4.61	5.47	6.57	3.24	5.3	3.38	8.53	4.45	6.72	8.17	6.04	9.4	5.77	3.33	7.47	6.94	2.7
ENSG00000083845	1285.67	765.14	1899.39	1443.81	1000.22	953.72	671.19	503.14	445.47	733.4	421.68	475.76	573.8	832.89	653.3	456.25	560.54	552.54	484.41	377.29	475.16	305.41	322.29	645.16	429.21	770.69	588.58	626.63	962.05	488.55	577.2	744.67	695.89	783.33	411.15	637.31	537.25	864.61	423.29	483.57	719.63	423.95	645.91	354.63	542.73	615.82	604.64	363.44	1094.65
ENSG00000084444	35.09	55.8	22.26	16.62	63.03	31.03	18.43	30.65	49.73	67.33	49.59	50.27	24.4	53.47	40.41	49.53	63.47	38.98	34.63	40.91	58.97	85.9	84.14	26.14	75.68	47.43	94.02	33.57	65.4	62.6	80.74	35.12	31.29	67.44	51.41	51.06	33.37	15.93	42.62	49.43	25.4	57.25	18.95	63.78	41	36.79	17.76	46.43	11.47
ENSG00000085514	10.63	13.86	15.87	26.84	2.07	20.83	11.78	7.24	11	13.9	10.3	7.94	11.82	1.03	20.71	4.73	16.35	16.7	9.67	27.89	27.04	22.11	4.4	9.3	6.11	8.26	2.61	28.4	20.63	9.19	16.43	19.11	20.46	23.92	13.84	19.03	15.03	70.58	34.42	21.29	12.38	11.5	30.61	3.68	30.29	35.51	30.93	15.22	37.04
ENSG00000085721	19.41	12.01	6.41	16.5	6.75	6.68	8.96	5.35	3.59	5.09	5.07	5.14	8.45	2.17	3.51	5.74	9.68	6.59	9.34	8.4	6.58	6.87	5.64	5.67	5.7	2.1	2.13	6.82	1.46	6.09	3.95	4.45	5.33	3.82	5.76	7.15	6.52	6.51	9.2	4.29	5.05	6.06	7.51	6.86	14.36	5.41	4.72	5.57	8.02
ENSG00000085872	91.67	72.28	95.01	66.36	81.89	67.84	55.48	65.46	52.9	67.95	60.83	47.23	47.01	66.97	46.46	60.29	59.15	46.21	55.01	66.24	55.91	48.84	51.36	63.02	45.34	51.13	55.12	39.56	52.64	38.54	57.11	45.89	48.35	57.22	44.22	43.22	61.65	48.25	60.03	60.44	50.52	55.07	43.91	33.57	63.4	46.03	70.45	63.5	38.53
ENSG00000086189	39.67	19.54	14.1	45.55	15.89	31.25	26.45	23.83	13.5	10.06	15.87	25.89	19.33	8.27	11.38	22.72	13.42	19.87	16.94	18.76	12.54	10.17	9.39	23.66	7.45	8.81	6.95	22.95	6	16.51	10.62	22.29	17.97	6.72	17.4	13.53	18.8	11.76	19.97	18.58	20.64	16.53	18.33	11.77	19.71	23.96	22.2	13.91	25.4
ENSG00000086232	36.69	34.11	37.45	32.92	30.5	30.42	34.95	41.88	39.23	38.51	37.49	39.33	36.83	24.92	33.26	39	41.21	40.85	42.92	45.89	38.81	39.48	45.33	36.89	40.17	44.14	54.01	46.44	33.12	54.54	51.56	54.37	43.77	38.52	51.43	57.3	48.44	45.34	36.57	36.36	41.39	41.9	40.11	44.31	44.27	38.76	27.37	39.53	40.79
ENSG00000086504	94.1	110.34	143.6	255.67	252.2	325.65	197.63	268.17	182.68	263.8	265.96	232.49	217.47	434.26	293.57	269.63	301.65	202.88	289.44	177.91	310.61	191.31	230.59	183.74	294.42	278.19	305.85	372.12	390.15	303.42	299.68	241.44	244.16	211.84	220.26	218.43	250.88	261.49	121.74	331.28	231.86	216.85	218.75	233.46	224.98	248.13	209.97	282.28	232.31
ENSG00000086589	62.67	57.57	73.7	91.62	57.67	54.99	57.75	51	51.65	53.07	55.36	57.68	51.21	55.27	45.32	47.51	39.06	46.39	43.39	51.12	51.79	48.53	46.88	37.72	50.75	45.01	55.53	41.02	37.91	51.7	55.71	51.74	42.57	48.19	39.61	45.81	38.17	37.69	55.55	51.01	50.3	53.41	55.07	53.13	54.86	36.11	40.2	44.73	43.94
ENSG00000086827	14.5	9.65	5.77	10.46	6.29	9.64	7.25	6.59	8.36	7.16	8.03	10.66	9.52	4.23	4.4	10.7	4.41	12.27	9.15	11.2	13.75	9.13	9.01	5.02	8.85	10.24	5.33	8.39	5.36	10.94	6.21	11.17	11.26	6.13	10.59	8.65	11.31	9.74	10.45	9.62	9.65	12.66	11.09	5.74	8.4	9.32	8.11	7.41	7.73
ENSG00000087074	137.6	119.09	186.25	390.14	108.84	133.68	90.75	92.45	77.06	71.56	65.97	62.21	68.5	96.43	70.09	68	60.33	52.66	60.03	52.17	65.4	53.9	51.29	70.9	68.81	120.75	98.33	91.86	231.66	79.09	123.29	77.72	90.23	87.9	74.79	64.52	70.96	111.59	55.16	69.07	46.01	61	131.34	139.18	56.64	43.08	57.24	96.67	97.71
ENSG00000087077	9.59	18.62	92.01	42.38	14.24	24.48	56.51	23.09	17.53	23.73	25.89	19.41	42.19	35.27	43.19	20.21	26.05	34.39	36.53	38.55	26.98	9.95	8.77	53.36	15.02	21.54	21.6	49.91	61.74	18.81	40.6	27.4	21.86	81.05	21.73	22.24	49.55	90.44	66.77	25.59	56.72	16.25	74.62	23.45	37.29	33.26	38.71	20.43	67.45
ENSG00000073670	19.37	18.33	3.11	16.42	20.54	18.07	16.43	27.68	26.85	31.33	31.77	33.23	18.9	26.76	18.48	29.07	29.63	16.21	30.79	35.74	31.16	41.77	33.33	21.67	30.67	29.07	26.05	18.83	22.08	20.96	23.24	23.86	32.9	22.78	31.6	22.24	37.06	12.68	19.37	37.24	21.16	39.11	24.17	17.02	38	20.43	25.55	42.29	17.81
ENSG00000197208	3.07	4.57	3.97	7.39	1.91	2.63	5.01	3.14	5.4	3.44	2.64	6.37	5.46	3.88	7.24	5.46	2.54	4.08	3.59	5.7	4.41	3.5	4.45	4.13	3.28	5.2	2.26	5.96	6.85	4.19	6.9	2.41	4.51	4	4.28	3.66	6.58	6.79	4.67	4.75	7.15	4.9	4.65	4.25	3.85	6.27	4.54	4.71	3.82
ENSG00000088356	24.11	37.07	21.6	62.28	17.84	39.87	25.32	23.28	22.47	34.92	20.77	21.02	25.03	36.37	32.75	23.62	19.98	23.32	21.93	27.25	18.67	11.8	12.48	19.48	16.84	23.85	28.09	9.76	25.52	20.85	28.23	40.64	23.2	24.28	24.67	28.78	15.29	20.02	16.07	25.24	29.85	24.95	14.62	8.35	34.94	26.31	28.07	22.19	21.01
ENSG00000088808	40.96	55.6	17.24	53.2	52.92	30.47	41.46	32.64	48.44	40.4	42.73	40.95	36.89	41.21	48.79	47.09	41.36	46.9	44.07	39.81	48.33	42.16	42.47	40.48	41.36	36.83	41.4	35.73	34.13	37.21	42.44	30.95	39.23	39.82	38.97	34.03	47.8	26.63	46.82	42.33	51.11	66.43	45.49	28.7	45.63	51.9	47.33	46.94	40.18
ENSG00000188559	16.09	9.72	14.58	11.48	7.05	3.91	12.07	6.86	5.44	4.27	5.57	7.23	6.65	2.18	5.6	3.76	5.61	4.69	5.83	4.25	3.53	4.99	4.64	6.73	5.03	2.19	2.22	3.07	2.03	2.12	3.39	1.84	3.71	2.86	3.37	2.92	3.95	4.77	12.32	3.3	7.03	6.16	6.97	8.36	2.66	5.29	5.75	4.14	1.72
ENSG00000089009	403.36	244.29	368.82	399.14	55.28	269.78	213.27	178.45	144.68	147.82	134.81	139.26	184.86	76.71	124.76	135.43	106.52	187.18	151.1	105.61	165.13	217.1	122.12	168.6	115.26	180.12	85.69	205.5	134.78	152.67	155.5	211.04	212.01	83.45	153.36	169.04	130.85	192.58	156.52	161.84	175.85	140.37	190.95	131.58	194.92	195.16	237.82	112.61	345.1
ENSG00000089048	15.88	10.91	2.37	16.63	5.1	8.75	22.92	18.04	12.94	2.97	11.75	14.67	18.54	3.09	4.92	13.43	3.05	16.55	13.93	16.66	14.27	16.52	14.18	12.03	5.38	7.85	2.43	20.57	1.63	12.65	5.02	12.49	15.73	4	15.69	12.63	14.52	17.3	19.47	12.47	17.34	16.24	18.45	8.24	19.17	17.05	20.37	13.19	14.33
ENSG00000089195	18.92	11.79	6.78	22.72	4.04	14.31	16.65	20.64	20.15	10.61	16.07	19.93	10.58	5.05	7.28	20.8	9.98	14.51	13.07	22	21.18	21.97	18.14	13.1	14.12	18.8	9.15	18.39	5.72	17.13	13.37	25.51	18.73	6.53	20.51	15.81	18.35	21.99	20.08	15.06	17.95	21.05	15.74	13.48	25.69	15.04	10.99	21.56	12.92
ENSG00000249115	19.64	16.07	24.32	12.21	5.82	10.92	16.43	15.02	15.48	9.67	14.55	13.13	14.49	4.48	7.47	6.66	5.78	8.69	12.33	16.01	6.36	5.39	6.55	13.55	3.07	5.28	4.58	5.59	4.06	4.19	4.85	6.14	17.57	5.11	9.89	7.43	10.65	9.15	12.32	6.28	18	16.76	19.46	3.98	18.05	8.23	22.51	10.29	17.89
ENSG00000010256	60.37	64.56	73.5	59.75	104.89	93.49	92.33	85.91	80.47	114.69	80.65	94.63	98.05	175.25	112.14	110.9	119.05	92.69	110.15	110.17	121.01	98.71	95.41	113.66	141	143.65	176.42	124.74	161.74	143.44	125.18	137.52	176.79	137.51	128.87	119.65	117.31	113.86	65.99	116.55	96.81	119.74	109.12	94.96	102.6	85.86	60.67	117.96	130.45
ENSG00000089639	50.74	37.36	51.16	25.59	28.89	13.04	11.26	9.26	15.85	18.81	11.28	7.18	8.14	9.23	13.36	6.52	11.81	10.66	7.78	8.19	5.52	7.06	6.03	5.38	8.47	7.99	7.35	6.2	6.46	4.54	4.67	9.91	5.27	10.45	5.88	7.61	7.46	11.05	21.23	11.21	12.12	5.48	11.6	2.3	9	8.85	14.61	7.83	6.21
ENSG00000089693	376.25	424.39	408.05	790.22	670.4	666.78	570.75	663.36	574.98	755.96	644.04	617.43	482.99	1029.83	648.95	666.89	767.1	419.61	652.6	620.71	681.19	562.7	621.36	616.77	782.95	766.54	975.51	881.55	888.96	792.63	726.17	763.26	730.11	800.18	634.15	612.47	719.47	694.77	414.61	653.29	488.52	641.93	547.51	588.42	737.61	532.66	531.44	675.39	670.26
ENSG00000089723	12.6	6.41	6.16	3.95	24.09	7.58	3.21	7.81	11.39	7.07	11.1	8.56	5.1	17.39	11.37	9.8	18.71	3.32	12.51	5.55	13.69	5.61	8.54	0.93	10.73	3.89	12.65	6.68	14.55	7.51	10.95	3.09	2.33	14.66	5.75	4.79	0.67	0.95	5.24	8.76	3	9.05	13.2	9.52	5.31	6.56	3.64	11.95	3.42
ENSG00000090006	55.91	95.79	116.29	85.22	60.63	88.99	104.6	77.64	74.4	65.66	64.92	48.85	39.33	43.46	54.88	49.77	56.07	43.43	86.02	32.3	57.06	34.68	35.56	30.68	24.21	31.56	20.57	31.2	76.12	18.68	62.53	51.58	17.58	132.81	28.04	24.24	35.48	37.48	52.14	63.77	58.44	26.01	152.46	16.48	35.36	49.62	43.54	49.84	47.68
ENSG00000090487	61.86	39.95	83.76	47.41	24.43	50.59	55.51	38.61	28.69	50.81	49.53	44.72	44.97	46.81	58.04	47.5	48.26	50.56	61.15	56.98	52.64	35.4	52.51	60.54	53.69	52.46	60.91	54.19	66.41	73.3	63.17	73.43	69.84	78.67	69.04	74.89	60.17	74.5	45.81	39.03	57.11	54.09	59.71	43.43	53.03	54.19	59.2	44.37	52.06
ENSG00000090539	7.75	40.79	14.41	42.93	20.4	36.95	38.41	37.4	36.4	21.26	49.73	22.04	39.36	22.81	39.08	25.94	25.09	19.38	49.95	41.61	35.85	28.55	34.8	30.63	19.96	40.92	15.64	39.91	18.24	19.14	25.83	34.47	53.27	21.64	44.08	27.26	40.51	45.07	31.19	32.17	41.67	55.76	48.42	14.32	36.96	31.97	26.63	39.65	37.33
ENSG00000090554	1.35	2.27	29.08	10.25	1.9	5.97	5.68	7.38	0.84	6.07	8.74	2.7	3.61	8.69	4.79	2.17	7.69	7.85	8.44	8.52	4.49	0	3.36	8.74	0.67	0	5.97	2.63	1.91	0.74	3.8	7.3	5.51	11.54	3.02	2.42	8.71	10.11	9.28	2.96	13.01	0.76	19.69	0	3.14	11.07	6.87	3.32	4.04
ENSG00000090776	61.38	16.26	50.16	22.25	26.42	19	28.27	6.61	13.05	14.49	4.17	8.05	20.12	20.75	9.16	8.63	10.32	2.34	8.82	7.83	8.58	7.91	7.03	19.58	13.54	4.11	13.08	9.42	23.94	6.18	13.62	3.27	2.19	22.97	7.21	2.89	3.78	13.41	12.92	11.47	7.06	6.38	10.78	0	11.24	14.54	16.41	11.89	0
ENSG00000090863	48.03	70.39	95.55	59.38	84.93	52.21	63.36	58.76	57.17	72.71	53.57	73.31	60.74	71.6	58.22	58.1	76.12	65.65	56.77	78.87	69.81	78.59	75.7	63.32	75.27	62.81	78.32	39.55	59.23	70.15	74.31	52.67	44.65	101.72	67.57	76.95	56.22	56.45	75.7	72.92	52.36	69.76	61.02	72.46	59.78	55.03	46.88	65.15	30.96
ENSG00000090932	16.09	15.08	63.89	14.38	14.43	17.58	3.65	10.38	10	20.73	14.33	6.94	8.13	9.14	9.25	6.04	11.74	9.46	5.43	7.59	4.33	4.05	2.43	5.27	2.36	10.33	4.48	8.88	8.29	4.51	7.09	12.02	3.55	4.95	4.37	7.27	5.6	4.33	5.72	9.98	6.84	1.72	6.07	5.42	5.8	5.34	7.46	8.01	7.8
ENSG00000090971	20.6	34.55	64.13	34.46	39.18	160.04	29.87	108.31	38.39	90.73	170.13	65.98	35.35	128.01	83.4	59.76	50.15	30.95	68.83	71.27	31.25	20.17	24.68	21.4	22.48	82.34	60.63	68.62	30.11	13.66	36.38	88.28	24.99	29.28	23.81	46.54	54.24	45.19	11.77	106.09	18	39.02	39.26	85.56	27.29	21.67	39.24	112.84	17.58
ENSG00000157426	9.23	7.15	3.73	4.3	1.81	6.56	7.5	5.48	4.62	1.84	5.96	4.3	7.41	1.39	2.53	5.09	2.96	6.69	8.59	7.35	6.12	6.12	5.73	6.97	1.61	4.04	2.19	5.49	2.1	2.76	3.18	5.62	3.64	1.9	5.65	5.33	6.79	4.94	7.65	4.71	7.02	4.2	9.02	9.89	6.9	5.6	8.69	6.39	3.56
ENSG00000091140	48.56	38.96	17.02	69.09	20.23	60.53	74.65	64.06	63.62	28.12	61.73	71.29	85.96	28.36	36.29	86.62	40.49	70.46	72.04	76.98	68.34	80.64	92.81	80.19	55.17	66.26	39.24	82.08	21.98	98.33	62.01	86.13	105.07	25.52	109.88	84.76	83.42	81.08	70.89	73.83	77.51	89.38	89.64	78.95	80.78	76.9	64.36	67.7	71.76
ENSG00000091317	8.78	10.64	25.34	15.12	2.05	12.91	10.24	10.97	11.82	8.2	5.67	10.21	14.32	3.42	9.33	10.95	17.67	6.37	11.41	14.89	9.71	6.45	9.09	16.55	4.33	6.2	6.46	5.69	3.1	10.39	8.22	12.82	6.96	8.32	10.61	9.61	8.56	13.36	15.89	3.2	15.34	7.43	20.41	0	6.78	21.55	12.08	5.39	2.19
ENSG00000091536	3.77	1.6	0.85	0.54	0.55	0.76	1.27	1.15	0.89	0.87	1.85	0.45	0.81	0.53	1.11	1.04	0.74	1.6	1.52	2.27	2.33	1.97	1.45	2.1	1.03	1.32	1.34	1.52	1.19	0.92	1.39	2.37	4.15	0.46	1.81	0.85	3.2	0.86	1.34	0.57	0.57	1.98	1.66	1.62	1.43	0.85	2.39	2.23	1.36
ENSG00000091640	100.75	122.83	112.44	119.46	93.38	211.24	145.7	195.92	132.37	200.96	139.79	148.15	129.34	238.24	133.43	170.38	152.49	113.82	133.95	137.63	153.51	119.68	152.9	101.42	167.72	151.27	155.58	171.74	151.53	169.62	164.31	170.38	223.29	136.21	142.87	181.4	203.96	168.66	115.16	155.2	125.58	138.89	158.26	96.06	137.86	159.5	109.08	160.13	128.3
ENSG00000091947	31.3	28.01	38.01	23	29.74	46.79	29.95	36.28	16.21	35.1	42.47	33.8	31.57	54.23	49.54	37.93	41.5	30.28	29.29	26.29	31.87	17.88	28.53	32.04	42.69	38.94	43.77	49.69	44.92	42.75	41.05	28.85	39.7	50.45	34.36	32.39	32.98	37.25	26.24	36.48	28.27	31.21	37.34	8.67	34.48	29.03	28.49	30.09	46.76
ENSG00000091986	4.81	14.4	69.82	62.01	19.44	31.21	48.56	17.56	5.45	8.25	8.6	4.37	38.04	8.6	6.82	6.35	12.67	8.42	15.23	6.86	6.95	3.47	2.81	10.75	3.35	4.8	3.54	4.13	9.59	3.09	5.89	3.82	2.31	28.78	3.48	1.86	5.3	6.11	36.4	7.11	26.23	4.79	18.54	11.76	10.17	17.14	17.98	4	13.11
ENSG00000092094	99.35	103.49	78.95	68.99	13.1	82.45	79.66	61.18	64.71	45.37	63.15	35.14	47.77	32.75	42.02	54.82	34.71	60.45	80.6	56.67	39.9	32.56	53.27	38.2	30.41	40.09	18.28	87.21	35.06	31.51	40.08	86.98	81.65	27.34	58.13	47.35	64.71	79.83	61.82	47.71	88.23	52.91	76.78	36.62	78.49	61.64	42.23	43.27	75.4
ENSG00000092096	461.51	481.2	472.75	513.69	848.35	870.12	586.78	784.52	725.81	1039.01	1012.61	827.57	729.83	1248.14	916.72	880.46	946.77	858.35	860.42	969.37	946.71	778.38	829.18	944.77	903.63	1316.5	1582.44	1260.09	1402.27	1037.93	1008.37	1410.73	1186.27	1192.06	990.36	1049.76	1263.42	1225.79	618.85	1043.74	774.39	949.69	759.7	736.64	976.22	696.52	835.49	1157.92	760.29
ENSG00000092295	4.61	4.23	1.97	4.76	0.92	1.69	4.15	3.37	3.68	3.51	6.8	2.79	2.34	0	3.03	3.69	1.4	3.82	3.85	3.67	2.84	3.54	4.91	2.13	0.97	1.12	0.48	3.52	0.46	0.9	1.85	1.55	8.05	1.87	2.02	2.95	3.27	3.28	2.26	3.06	5.47	5.2	2.99	0	3.62	5.66	3.76	2.63	8.85
ENSG00000092850	58.72	27.94	26.48	27.97	6.42	15.61	18.8	15.76	5.82	5.6	12.11	6.23	8.34	3.65	5.31	5.68	4.44	3.62	9.26	10.29	3.73	2.14	6.21	6.06	2.16	3.18	0.92	4.86	2.65	1.71	2.81	1.68	3.82	3.55	4.18	2.61	6.58	3.63	7.85	8.53	6	2.82	8.71	0	9.41	7.16	7.54	6.13	4.67
ENSG00000094804	1.44	1.61	3.44	10.91	1.12	3.88	5.04	3.93	6.56	1.61	5.58	4.78	3.42	2.24	4.08	5.39	4.43	2.09	9.36	3.25	9.24	6.34	4.47	2.33	5.2	3.26	2.83	6.06	2.37	5.51	4.85	3.56	3.26	3.41	2.95	1.72	2.81	1.2	4.39	5.77	2.1	2.71	3.49	3.99	8.9	7.46	5.49	2.94	3.58
ENSG00000094914	27.64	18.8	43.72	30.88	12.22	27.46	36.62	25.98	19.96	14.24	34.27	18.99	32.58	13.53	22.77	11.18	12.2	19.51	17.48	31.49	18.35	15.36	15.78	24.15	8.84	19.01	10.45	23.96	15.29	9.39	12.6	26.2	40.1	18.06	24.6	20.51	35.42	24.19	19.64	20.41	37.22	20.66	28.09	6.21	28.15	20.79	33.69	16.05	34.6
ENSG00000094916	35.05	32.14	48.56	11.59	30.14	29.89	42.21	18.16	36.59	21.23	9.96	18.17	26.2	9.01	19.87	23.23	30.87	48.82	17.5	14.94	22.34	27.46	22.65	16.99	21.43	8.32	22.7	19.08	15.83	23.75	13.4	12.29	22.86	14.95	18.78	17.58	18.05	18.63	27.25	18.38	28.19	28.49	19.56	69.9	26.01	21.8	24.04	14.63	25.13
ENSG00000095059	211.73	179.01	309.37	196.98	205.01	215.54	185.43	212.3	167.26	198.68	194.62	192.89	174.82	297.87	178.92	200.29	211.35	153.07	178.17	192.12	182.11	162.8	156.87	214.59	224.89	254.85	277.38	208.6	295.27	213.45	201.2	211.45	320.31	212.61	205.06	211.95	230.81	244.05	149.7	213.07	171.06	213.95	189.75	136.03	210.87	157.2	181.6	201.36	193.47
ENSG00000167964	15.42	13.33	9.21	34.77	7.21	49.47	18.65	42.06	32.23	58.18	86.97	39.13	44.92	32.75	27.82	30.73	17.92	30.51	45.93	47.55	42.82	50.11	53.14	35.12	32.49	52.32	22.7	51.78	24.74	25.28	34.68	67.12	85.73	24.92	49.3	50.22	69.75	46.56	30.45	31.41	37.99	46.69	39.12	11.65	60.96	37.87	24.04	104.97	108.92
ENSG00000095261	14.37	10.93	11.33	9.9	5.37	10.56	14.09	9.01	11.43	9.67	10.03	12.03	10.74	4.03	9.37	16.59	10.61	10.42	13.9	11.14	9.16	12.1	11.07	11.15	11.9	8.77	5.08	7.26	7.71	9.11	9.69	7.75	10.54	5.72	11.55	12.35	10.77	4.3	13.14	11.31	9.04	12	10.81	14.33	12.66	8.94	9.13	11.99	8.59
ENSG00000095380	33.18	32.71	39.63	84.81	39.98	62.25	45.85	39.29	34.17	36.72	36.1	37.42	39.63	49.97	37.12	31.73	35.35	37.37	32.68	35.53	34.78	32.92	29.29	28.22	43.47	74.79	53.33	39.03	51.15	46.74	46.13	36.5	75.33	43.45	51.16	44.3	50.08	58.72	37.92	39.12	30.52	48.79	39.71	29.02	45.04	27.87	31.61	43.4	63.91
ENSG00000096092	191.14	135.48	70.74	185.45	33.96	257.25	156.44	201.88	132.13	178.12	156.54	186.47	148.53	102.19	110.65	202.89	124.28	83.98	109.17	123.91	157.28	159.49	165.59	115.29	140.68	171.23	132.74	162.21	85.5	211.78	152.82	136.14	223.13	78.47	148.74	199.27	110.29	125.17	110.78	180.91	80	151.94	202.45	123.03	209.1	123.38	143.61	165.2	96.52
ENSG00000204314	17.54	36.77	5.24	16.31	57.78	37.39	30.08	53.21	46.85	44.74	55.52	33.65	29.65	61.45	38.53	44.53	64.15	34.35	35.56	39.94	51.23	29.62	32.14	41.1	33.72	58.75	47.11	46.02	47.04	28.26	47.32	54.4	26.21	48.01	24.96	31.41	29.77	49.51	31.07	51.26	19.93	46.03	32.97	32.79	38.12	25.12	40.1	51.66	28.82
ENSG00000035403	8.66	11.98	19.6	16.01	7.24	8.38	22.98	8.39	11.04	8.94	10.01	10.67	12.17	5.32	9.37	11.94	9.39	11.57	21.68	16.78	17.55	13.61	9.63	14.36	4.27	9.28	6.04	10.63	15.44	2.99	19.73	11.99	7.74	41.48	8.14	10.34	9.87	13.62	19.02	10.96	13.94	13.12	34.28	18.94	7.66	8.21	12.74	10.35	14.3
ENSG00000096717	23.69	12.79	8.78	13.51	4.58	6.61	12.01	9.47	7.87	2.52	8.45	8.75	6.91	2.15	4.92	10.26	6.38	10.67	10.51	11.08	8.68	9.4	6.35	9.24	3.83	5.2	2.1	8.34	2.02	7.14	6.2	5.51	5.55	2.03	7.75	6.83	5.74	7.8	11.21	6.25	8.93	8.99	11.15	15.27	7.81	9.7	11.67	7.27	12.21
ENSG00000099326	49.75	39.71	46.24	51.96	30.75	91.72	58.99	77.41	43.37	60.07	103.69	52.98	56.05	52.95	65.68	44.61	47.3	47.44	59.45	67.25	40.75	29.47	32.16	59.33	22.55	58.18	29.53	62	38.51	28.49	40.82	67.36	52.33	34.8	37.39	49.57	77.25	54.63	35.31	58.31	45.58	51.85	56.94	23.34	52.33	48.27	65.23	66.23	63.53
ENSG00000099330	24.38	26.13	20.02	22.39	26.58	32.86	29.87	60.25	37.24	50.13	56.45	29.87	31.64	61.11	74.87	31.49	38.24	24.32	36.44	47.74	35.75	28.35	27.77	40.22	42.07	67.2	61.31	56.27	50.19	36.63	36.54	54.11	64.19	38.28	65.2	41.84	45.78	45.55	26.13	43.85	46.17	38.99	46.82	54.87	47.7	32.42	31.61	29.3	33.39
ENSG00000099341	297.21	397.4	495.8	480.69	490.6	629.28	454.62	605.65	477.68	594.14	532.23	542.52	549.1	854.65	549.44	611.27	589.66	393.71	481.19	413.19	609.12	514.05	445.59	438.54	710.28	747.95	668.08	759.77	686.28	686.51	568.32	566.34	700.12	689.03	598.56	605.52	518.07	638.35	395.1	633.62	451.75	475.88	566.22	442.9	554.27	584.29	496.49	461.89	497.07
ENSG00000099365	70.44	90.64	40.91	29.25	118.13	53.2	48.64	86.83	134.88	160.15	73.56	108.67	56.67	158.91	140.86	116.56	169.95	173.59	107.61	108.92	121.72	152.6	180.45	92	214.53	153.84	279.79	73.14	194.09	158.66	157.28	94.99	138.97	204.43	131.93	152.64	115.77	71.3	90.44	124.94	101.2	179.71	73.73	172.38	109.06	123.98	44.12	145.66	105.22
ENSG00000099624	208.68	287.7	364.34	429.06	361.75	717.78	426.04	567.97	371.13	507.33	831.58	351.66	433.78	801.92	696.51	394.22	449.15	395.21	383.86	363.5	394.48	238.66	219.72	395.15	314.9	599.82	600.24	679.62	453.08	352.44	424.39	641.22	470.77	403.18	384.94	428.85	536.09	453.64	179.35	530.01	403.74	369.51	465.66	317.66	301.01	327.22	299.45	416.42	671.06
ENSG00000099625	77.32	62.03	64.74	68.89	135.48	114.9	115.33	115.16	149.33	109.32	97.73	113.49	77.03	153.62	119.11	131.62	122.96	76.21	95.03	45.6	137.26	89.7	105.47	82.17	102.33	87.67	97.1	59.62	151.84	70.7	121.4	55.53	59.38	117.71	57.69	59.2	69.35	35.59	45.15	161.62	95.49	90.12	74.41	66.34	44.82	114.86	65.65	151.1	95.41
ENSG00000070388	0	4.53	3.23	1.86	2.52	17.87	7.56	7.37	3.36	12.12	27.92	6.73	4.81	11.04	17.23	11.55	1.92	3.92	6.32	15.7	3.59	3.97	3.36	8.73	6.66	18.33	0	13.13	1.91	4.43	4.55	38.25	5.51	1.92	9.04	12.9	9.49	22.43	1.54	11.81	4.72	4.57	6.55	11.22	0	4.42	8.58	9.95	4.04
ENSG00000099795	148.26	121.08	140.96	287.59	236.09	367.1	278.63	268.65	230.28	332.53	247.03	266.36	229.16	486.47	358.05	297.17	329.75	172.65	225.16	215.49	261.62	175.75	179.38	236.44	259.66	588.98	325.9	400.03	439.2	279.22	305.91	386.71	383.02	284.32	228.63	246.87	319.69	366.04	132.67	321.87	306.89	227.91	291.05	137.78	220.5	340.06	183.36	275.33	518.72
ENSG00000099800	78.52	117.6	165.79	185.45	184.76	206.13	174.74	151.03	149.83	232.71	211.98	148.13	89.84	255.48	184.82	136.4	143.4	132.23	164.02	116.84	111.71	87.87	108.02	131.42	132.71	166.48	146.53	190.77	148.44	122.56	124.52	130.47	152.41	117.63	120.51	127.22	114.89	169.96	121.8	168.53	181.37	147.19	125.85	93.2	112.16	156.06	110.42	101.53	188.51
ENSG00000099804	95.72	60.21	85.74	65.94	89.45	118.73	104.71	122.35	141.24	107.34	154.61	119.25	63.89	181.68	101.75	118.31	114.72	104.16	116.64	63.76	111.21	90.8	100.36	101.51	150.41	71.03	145.29	127.91	168.89	104.58	67.25	80.68	81.29	140.36	103.5	128.56	105.04	64.57	75.22	81.71	109.8	84.41	97.96	124.27	128.3	102.82	94.98	88.11	98.31
ENSG00000099817	131.44	120.43	140.91	186.54	243.45	217.68	172.96	202.96	195.79	237.97	174.96	169.67	173.34	267.27	227.81	168.44	202.45	204.48	192.66	175.69	198.71	178.33	174.15	199.61	210	253.83	237.75	206.23	225.77	195.51	179.79	179.38	231.31	240.94	192.66	186.22	208.54	191.96	148.43	182.55	185.46	153.73	159.43	171.06	201.02	168.48	124.71	219.62	229.47
ENSG00000099821	15.42	16.27	31.4	17.14	15.23	20.1	13.99	22.46	16.55	26.14	34.88	19.91	17.47	28.05	24.1	16.68	17.92	19.58	22.96	32.44	20.01	13.56	14.37	23.23	16.07	31.51	19.35	21.12	21.03	18	19.11	38.76	27.15	23.43	18.39	24.9	24.41	25.9	17.63	23.56	22.06	25.13	19.35	11.65	18.08	14.34	16.7	24.31	20.42
ENSG00000099860	25.08	65.45	365.47	547.14	7.81	90.95	106.53	29.64	16.62	21.56	58.34	22.5	220.23	39.06	63.99	25.03	57	47.31	61.29	75.34	74.38	26.2	21.82	518.83	42.86	480.73	114.45	73.13	665.59	59.38	436.08	213.09	54.53	430.35	39.19	43.92	57.74	380.39	220.75	30.15	42.38	38.69	295.1	222.3	63	26	111.5	58.49	52.46
ENSG00000188130	75.15	47.87	71.01	58.98	24.45	72.02	87.91	57.07	39.6	37.34	93.42	38.87	61.8	79.44	49.21	53.9	46.62	42.79	63.06	70.97	94.73	40.52	62.06	121.45	51.58	45.99	35.7	54.54	62.44	46.77	46.52	62.86	54.93	50.72	54.68	67.01	59.57	92.41	48.39	68.08	54.04	54.76	49.62	35.57	62.86	83.3	38.66	93.98	82.42
ENSG00000099940	11.43	13.37	26.69	21.48	10.69	25.98	16.74	21.97	14.21	36.13	22.83	22.79	23.12	19.42	27.99	28.89	23.62	16.59	31.61	26.69	20.01	17.81	23.89	19.32	18.45	43.19	23.71	28.28	22.01	21.01	24.54	29.44	21.18	23.65	31.32	26.06	27.98	20.71	22.57	26.12	27.25	18.77	28.37	25.91	21.09	22.97	38.95	31.25	6.21
ENSG00000099949	33.58	28.95	46.16	18.31	25.82	22.63	33.55	27.66	28.25	30.2	41.35	24.4	28.64	20.22	30.74	25.24	21.61	20.55	21.28	31.52	22.29	20.72	21.51	23.18	22.42	19.28	14.16	19.04	23.7	13.38	17.1	22.64	15.68	19.89	22.06	21.3	24.77	18	22.19	28.28	29.65	27.05	35.43	18.89	31.02	25.19	37.32	23.18	17.77
ENSG00000184436	24.32	30.59	41.49	46.66	38.14	101.5	49.86	68.08	47.48	72.07	67.33	52.8	52.55	100.93	67.7	55.7	58.59	51.66	62.31	65.63	55.93	37.84	46.4	64.56	56.94	86.91	86.92	94.52	82.13	76.85	54.18	94.27	100.3	67.92	60.1	60.13	62.01	95.17	40.2	59.31	66.79	57.35	54.25	46.9	60.91	76.76	39.16	53.29	86.92
ENSG00000099995	84.16	90.61	115.5	75.52	136.26	77.06	88.9	76.75	91.73	84.65	77.74	71	85.08	101.1	86.32	74.78	99.1	99.34	67.36	73.68	78.42	82.59	76.6	67.41	93.35	72	124.96	73.9	110.46	81.06	90.87	51.52	77.49	152.73	70.66	69.19	77.34	79.07	81.85	89.74	89.36	100	85.74	73.61	65.47	75.22	57.2	76.11	62.31
ENSG00000184979	1.58	4.86	19.82	18.51	5.17	5.81	6.64	7.54	3.44	5.32	1.02	1.97	1.41	4.15	10.64	2.11	5.61	5.73	3.7	6.51	6.3	1.93	2.45	2.55	5.06	4.02	1.74	6.14	5.58	3.89	4.89	2.66	1.07	6.18	3.09	0.47	6.01	2.62	4.52	4.32	35.22	1.34	5.75	0	2.29	21.34	3.51	2.91	7.08
ENSG00000099999	51.2	58.69	42.8	58.19	37.68	79.03	71.69	77.66	45.33	61.72	74.42	43.37	61.51	75.5	63.49	64.31	64.54	49.21	59.89	62.63	54.38	51.39	31.01	51.71	47.32	49.93	64.05	69.66	58.72	48.94	56.11	50.05	41.74	46.41	44.29	49.66	68.17	64.82	54.86	69.93	62.64	43.34	69.09	42.54	51.93	45.04	65.84	62.05	59.27
ENSG00000100028	12.72	15.41	20.25	24.82	7.92	26.49	38.59	26.01	14.49	16.64	16.43	20.07	11.32	11.14	16.52	20.39	21.08	23.07	29.76	14.38	14.07	15.57	15.8	8.56	16.72	17.98	12.48	20.6	16.46	19.69	20.25	20.01	14.4	25.62	21.29	18.98	9.93	15.84	25.44	13.9	20.38	11.96	25.71	26.42	23.35	32.96	14.81	20.81	22.17
ENSG00000100030	94.71	157.2	83.28	81.68	172.14	91.54	84.06	112.86	212.2	197.78	131.53	160.54	114.81	90.15	125.25	159.84	238.34	155.8	165.16	135.12	176.75	245	223.79	94	214.69	111.31	121.84	85.52	108.95	162.96	221.73	109.62	70.42	152.69	157.32	144.67	95.58	60.68	179.43	133.23	92.55	158.67	90	303.62	140.48	135.49	103.24	155.13	51.24
ENSG00000185339	8.18	21.1	32.68	17.77	31.15	41.15	40.07	20.15	19.93	20.1	11.38	14.1	25.19	27.18	37.89	19.16	32.61	30.12	44.64	26.82	30.9	10.47	13.29	36.59	15.81	22.94	14.81	19.56	55.49	18.9	29.7	48.35	8.97	101.51	18.96	15.02	25.77	90.34	24.8	19.59	64.87	13.84	103	13.07	28.07	25.22	21.17	18.14	45.1
ENSG00000100075	44.01	67.55	130.88	87.38	86.28	79.92	58.6	39.41	34.31	55.64	41.81	33.97	58.36	54.93	47.08	21.68	35.54	40.06	37.01	35.53	20.05	17.74	13.4	56.47	21.69	38.05	36.83	41.09	36.54	24.98	34.43	37.82	35.76	77.3	33.23	41.72	54.04	66.62	37.97	27.81	37.71	26.78	44.48	17.92	34.51	41.66	72.88	28.06	48.98
ENSG00000241360	104.24	175.37	90.94	116.77	307.07	219.21	178.96	285.49	319.31	453.36	372.46	285.47	288.78	544.71	556.92	298.45	430.04	307.74	328.7	250.32	263.58	248.97	260.19	344.97	288.21	313.64	379.58	305.67	399.83	275.32	325.55	364.87	217.38	340.91	208.41	236.99	273.21	170.83	217.58	305.05	300.25	263.98	190.76	271.14	257.45	312.31	155.42	310.37	349.35
ENSG00000128203	32.01	50.86	26.94	64.66	80.92	33.69	30.06	51.09	42.04	90.98	69.1	62.36	36.26	67.99	44.34	62.61	82.68	32.2	59.01	30.67	61.83	55.93	51.53	21.16	62.77	54.92	68.54	41.72	62.14	59.62	67.07	32.38	29.16	46.56	35.33	31.71	31.09	12.69	46.57	63.2	37.52	50.51	24.27	63.48	44.28	53	25.41	54.47	20.65
ENSG00000100097	91.11	112.9	1552.76	627.6	459.07	485.07	520.63	214.87	243.23	437.66	302.26	332.52	565.33	985.02	525.22	579.09	328.77	303.66	334.12	489.1	575.43	434	480.37	539.18	753.79	1054.55	853.51	990.68	915.83	840.71	599.25	916.45	945.14	884.05	883.58	632.02	824.32	738	346.18	301.33	466.98	283.5	952.74	368.27	421.04	362.72	780.3	382.27	904.85
ENSG00000100100	23.45	56.45	38.36	45.66	44.79	47.97	42.84	32.67	33.58	49.74	54.68	43.19	82.58	84.57	58.53	43.6	62.28	73.97	37.38	81.52	25.73	34.95	31.68	93.93	57.31	41.51	51.03	42.61	64.77	61.84	45.85	38.5	45.03	64.52	44.39	75.48	76.99	127	105.49	33.98	67.73	42.01	45.15	63.55	54.97	44.23	80.95	55.07	36.56
ENSG00000100104	24.9	41.76	28.55	43.9	43.74	43.92	46.02	57.71	58.16	58.07	50.83	61.04	45.2	55.83	52.93	44.18	61.53	37.57	54.36	33.29	65.45	46.81	32.17	32.99	40.26	41.38	38.11	37.74	51.31	54.4	53.73	35.59	39.24	39.65	37.24	36.86	38.47	28.94	39.27	50.6	26.98	33.16	38.05	33.1	45.6	54.6	47.43	37.28	46.12
ENSG00000100122	0	2.34	0.83	5.77	1.96	9.23	13.67	18.07	11.27	11.73	18.93	16.68	22.34	31.77	28.67	24.6	13.87	4.05	20.67	6.08	27.78	16.39	11.27	6.76	8.94	21.29	19.5	14.91	14.77	19.81	9.41	12.23	14.21	14.88	11.68	5	9.8	15.06	15.94	15.24	13.41	10.23	16.92	17.39	21.02	13.7	5.32	11.98	27.09
ENSG00000100124	35.85	24.27	25.92	61.1	25.57	52.71	50.2	48.88	51.58	32.8	49.99	33.85	33.58	52.9	58.84	39.34	37.53	34.22	41.2	35.65	42.59	39.73	36.34	38.12	40	35.21	41.66	47.68	54.6	39.17	38.18	27.99	42.31	52.32	47.39	34.92	39.76	50.13	31.27	49.48	29.69	26.62	40.05	31.36	39.38	24.71	37.15	57.9	50.74
ENSG00000100139	39.97	25.78	45.11	17.55	35.09	10.98	15.99	6.29	11.73	21.42	9.36	16.85	7.43	6.41	14.94	3.99	7.49	13.7	6.16	10	5.54	6.45	4.37	4.97	6.49	8.94	4.85	7.68	7.44	5.28	3.95	5.33	6.27	13.43	6.86	13.37	10.02	9.48	10.29	4.8	13.05	6.44	12.78	3.65	7.13	9.34	5.86	4.85	9.84
ENSG00000100209	6.84	15.95	25.89	17.29	10.13	19.29	16.77	13.22	14.88	21.11	14	13.07	32.48	15.32	24.25	19.51	12.15	18.21	18.68	11.05	18.18	8.38	13.47	16.59	19.68	25.15	12.59	24.39	20.93	19.32	15.39	16.15	17.82	20.28	17.19	19.75	12.69	18.94	20.86	17.45	19.94	18.67	18.68	9.48	23.14	24.27	25.36	11.9	40.9
ENSG00000100216	99.78	87.37	159.64	101.16	80.05	117.63	64.59	116.79	108.77	131.95	86.36	107.89	98.84	168.21	145.42	126.79	117.66	92.87	117.45	103.98	144.99	76.5	108.78	103.44	129	151.68	152.4	177.47	174.06	151.18	159.78	133.28	199.52	140.54	108.22	131.48	91.45	121.92	89.3	132.68	106.95	129.63	141.58	70.39	145.13	130.96	89.67	99.35	165.93
ENSG00000100218	1.54	0.86	3.69	2.66	2.16	2.27	4.32	4.21	2.4	4.76	2.99	3.46	4.12	6.31	8.2	3.3	6.03	8.39	4.21	4.11	2.05	4.53	2.88	5.61	6.46	2.62	4.54	3	3.81	4.64	4.34	2.6	5.24	4.94	4.3	2.3	7.67	5.12	2.2	2.95	4.05	4.79	3.74	6.41	4.92	5.68	1.47	3.31	6.91
ENSG00000100220	61.19	69.61	86.42	66.7	89.75	61.01	61.46	58.76	52.89	90.09	67.72	80.6	76.23	103.47	62.21	87.3	104.67	72.56	82.57	93.57	79.12	82.84	89.25	85.12	127.99	107.39	117.47	96.17	105.14	120.62	102.57	105.83	116.39	98.35	120.85	117.51	87.19	109.55	73.89	83.71	73.93	90.98	87.44	88.41	106.7	69.67	82.78	83.58	67.56
ENSG00000100221	94.16	126.06	110.08	106.89	96.67	73.11	82.64	85.89	121.94	91.46	89.96	96.49	79.07	86.74	93.98	106.33	79.12	78.89	82.74	80.31	93.33	94.15	109.59	73.94	115.06	70.86	100.53	73.46	106.7	108.67	129.7	67.96	61.27	99	74.75	88.66	59.77	49.55	74.28	92.74	49.84	106.28	92.49	66.11	99.93	86.83	69.06	83.82	87.17
ENSG00000100226	87.6	77.51	140.37	66.98	120.72	48.14	54.29	48.21	60.16	44.61	41.54	45.05	38.62	61.48	64.64	42.52	62.21	54.22	44.5	46.14	37.88	41.9	44.69	45.13	44.96	41.91	56.48	28.51	64.94	46.75	52.62	35.76	47.5	73.13	39.24	44.85	42.33	43.37	63.15	43.68	56.54	47.17	39.23	41.73	40.06	43.74	31.13	43.4	30.01
ENSG00000100239	114.88	106.4	94.45	94.26	109.44	106.9	131.89	118.67	104.98	140.24	128.08	112.43	92.88	148.11	105.99	113.28	113	102.26	104.48	119.94	114.08	101.27	101.82	107.48	114.99	113.89	126.7	128.34	117.46	106.74	94.26	123.16	141.82	111.76	105.31	104.09	121.62	107.53	91.84	126.74	119.59	121.23	116.18	76.68	120.45	99.74	109.53	113.65	103.63
ENSG00000100246	27.94	32.66	43.98	43.74	45.1	67.21	94.24	107.35	96.25	85.44	82.04	113.9	61.02	140.91	106.19	114.03	101.01	105.02	91.11	44.3	89.37	77.1	91.52	57.46	97.66	53.85	100.93	106.13	143.4	108.22	98.49	73.64	69.02	155.28	77.96	89.45	80.27	67.48	59.51	126.27	73.25	74.54	81.63	84.41	67.72	85.22	70.97	113.77	102.44
ENSG00000100263	44.7	57.54	61.45	112.42	43.23	124.54	72.05	65.9	36.81	61.78	79.91	39.37	59.2	54.03	56.72	55.56	43.56	41.47	60.79	52.88	43.48	30.03	31.64	49.55	30.74	42.31	34.42	79.8	40.35	34.07	45.57	69.38	77.68	38.43	56.27	36.61	51.1	78.53	44.55	51.68	67.22	47.52	59.26	8.64	48.2	46.79	55.45	42.1	80.74
ENSG00000100276	19.8	32.47	69.35	50	24.05	150.36	22.17	98.96	50.01	167.23	242.14	74.97	34.06	182.65	125.31	68.42	75.92	22.98	91.59	78.64	32.42	29.08	27.06	20.26	29.93	108.56	18.45	61.56	41.91	27.39	45.24	105.89	26.9	32.84	25.78	90.59	61.79	31.77	25.64	134.1	17.3	57.35	43.22	54.83	28.3	30.24	27.66	207.31	25.63
ENSG00000100281	21.02	20	14.15	10.47	8.15	6.9	15.03	6.71	11.67	6.77	6.36	8.47	6.37	3.13	4.44	6.45	10.8	10.38	10.46	10.83	8.02	10.73	10	8.67	8.38	2.65	5.92	6.52	2.21	7.82	7.79	9.95	6.08	7.95	6.24	9.34	6.54	8.91	10.99	7.09	9.77	11.11	8.41	14.86	8.81	6.59	4.83	7.13	4.68
ENSG00000100292	0.93	4.17	177.45	134.12	4.35	18.49	8.48	2.54	5.79	10.97	7.82	4.18	56.37	6.53	15.18	6.47	9.26	13.52	11.62	11.73	4.95	5.47	4.05	27.1	7.81	5.53	8.91	19.92	43.39	5.09	8.9	14.45	5.06	32.45	5.2	7.78	7.63	32.48	83.58	8.14	14.65	7.36	26.55	19.35	32.94	12.2	84.6	2.29	13.92
ENSG00000184117	90.96	125.61	80.66	79.75	141.04	76.99	58.86	88.32	89.05	115.92	78.36	89.97	58.87	119.12	106.46	100.92	106.69	93.98	92.43	77.46	102.48	85.7	88.2	51.23	125.69	111.04	121.72	111.17	109.92	114.44	97.6	79.92	89.89	97.99	116.14	92.96	74.21	74.38	75.62	83.58	75.89	82.45	79.41	74.44	94.27	81.21	52.52	88.8	90.59
ENSG00000100297	3.98	7.79	37.34	7.96	8.93	10.83	9.76	6.79	3.96	8.04	4.12	9.53	13.47	7.67	7.06	3.19	7.92	12.13	5.59	6.75	5.82	3.51	3.22	9.98	5.1	6.08	4.1	3.1	10.12	5.66	4.48	9.67	5.95	12.17	6.89	7.61	6.53	13.23	15.48	6.31	10.44	6.29	14.73	4.96	7.85	4.89	13.4	4.4	13.68
ENSG00000100302	13.71	41.75	37.31	67.18	84.73	67.21	61.88	87.26	105.09	57.25	72.85	69.86	82.72	135.27	124.19	73.3	86.58	79.59	84.37	68.66	85.99	75.35	103.2	67.72	99.91	105.97	118.88	56.27	102.17	79.08	105.35	68.84	166.68	119.17	87.59	86.41	85.62	36.69	121.92	77.42	138.51	237.37	73.93	82.3	98.04	139.67	47.42	74.81	88.78
ENSG00000100304	67.07	87.08	71.06	38.93	104.33	35.46	31.84	43.85	72.5	57.96	70.34	59.52	61.32	72.71	84.32	60.65	60.04	62.32	53.74	82.35	61.31	55.56	69.07	80.92	67.04	67.4	63.22	50.45	66.79	62.74	60.68	87.97	76.78	75.12	58.46	60.06	71.52	49.97	60.39	55.22	48.98	64.3	46.81	61.08	82.02	55.27	54.56	66.53	65.2
ENSG00000100307	18.16	6.57	12.12	11.77	14.48	21.2	12.72	53.89	80.97	83.86	75.23	58.56	81.76	104.81	133.24	81.65	122.91	119.35	86.64	127.32	94.33	99.38	118.15	143.29	127.45	115.06	132.08	93.44	162.86	135.4	129.7	132.54	95.8	136.71	91.81	126.9	143.81	85.15	98.3	56.03	108.31	112.15	56.37	142.02	104.65	117.15	60.38	90.47	110.11
ENSG00000100324	46.32	52.11	57.28	33.79	71.05	46.87	42.73	44.58	46.05	47.36	36.62	37.75	40.25	54.74	52.52	41.65	49.93	43.09	34.42	58.35	40.16	30.68	34.54	40.51	38.69	38.36	49.73	32.31	48.08	32.75	47.78	42.26	42.58	53.08	44.1	34.48	50.71	34.84	49.52	34.24	48.1	47.67	46.27	27.17	45.8	39.25	26.65	46.15	48.03
ENSG00000100344	16.2	8.74	1.67	6.54	25.32	3.69	5.47	4.57	5.21	6.58	1.08	3.62	3.48	4.24	3.56	3.88	7.54	3.24	3.48	4.06	4.45	4.65	4.16	1.35	6.88	2.84	1.64	2.17	5.12	2.14	4.08	2.26	0.76	4.37	3.43	1.33	0.98	5.56	1.28	4.27	3.91	0.95	3.05	6.96	1.29	2.74	0.71	2.06	0.83
ENSG00000100345	30.41	49.46	153.61	61.53	45.04	46.73	88.42	37.92	57.85	43.4	55.03	57.08	73.33	55.59	60.48	62.14	72.27	49	74.64	65.45	91.76	56.08	58.28	102.74	69.07	49.08	63.57	44.16	102.78	49.55	79.91	53.23	41.78	186.69	43	43.41	54.4	89.64	99.32	69.47	63.87	55.48	149.61	57.42	58.58	59.66	68.46	64.35	55.48
ENSG00000100348	99.18	178.26	152.3	151.29	188.69	249.96	138.88	236.66	158.45	242.31	164.78	211.82	226.96	409.6	185.76	196.91	166.04	92.51	198.9	223.1	178.73	131.81	176.07	194.63	261.93	222.3	276.33	316.71	225	201.25	262.8	191.07	231.03	256.88	193.73	173.39	232.2	329.39	218.64	178.04	210.52	183.93	244.9	58.87	238.17	220.32	170.97	226.06	317.49
ENSG00000100353	136.32	114.34	242.47	136.13	90.97	132.65	105.06	95.94	74.03	101.46	104.87	102.39	121.75	109.68	101.82	92.26	95.43	112.05	107.08	96.69	96.04	80.67	71.9	89.55	103.95	106.05	114.04	97.22	110.4	104.47	89.3	121.34	111.94	134.22	90.86	110.94	90.4	160.41	117.42	105.02	96.86	88.29	135.61	71.3	123.93	89.89	118.03	97.79	123.8
ENSG00000100376	15.04	13.03	18.86	11.91	3.16	20.45	8.95	8.2	26.63	16.87	14.58	13.49	16.06	7.47	15.45	9.65	16.56	10.91	15.83	31.7	14.48	10.31	13.08	12.15	14.46	10.2	13.28	28.5	15.39	14.79	10.57	14.2	11.75	12.83	11.75	21.55	9.68	8.74	27.51	9.45	15.77	19.52	26.45	12.5	30.51	33.23	22.92	9.69	17.97
ENSG00000100380	92.41	88.69	116.45	114.78	40.12	65.78	75.9	69.94	70.07	58.34	52.65	81.94	91.94	42.07	71.67	57.17	65.63	108.2	73.2	64.51	59.42	130.03	73.69	75.25	60.62	77.13	62.12	94.75	34.92	99.37	74.02	91.25	83.54	50.18	94.2	98.59	88.15	82.76	89.82	65.19	88.39	79.67	85.16	108.82	87.3	74.43	134.46	61.61	117.39
ENSG00000100387	24.7	20.72	7.37	37.43	6.92	43.57	48.42	37.04	16.88	18	17.55	18.46	19.78	24.52	14	26.4	22.8	23.29	11.56	11.97	22.96	13.3	16.88	33.93	26.79	39.8	12.72	26.4	15.69	17.54	19.43	39.97	25.17	17.56	19.3	28.01	14.46	28.71	24	17.54	17.27	20.91	23.97	20.52	22.91	22.23	15.69	18.19	18.45
ENSG00000100395	28.6	41.36	30.74	29.68	77.51	51.01	40.31	52.77	42.64	54.74	56.17	52.64	47.85	60.13	48.1	54.83	57.96	49.51	49.96	51.17	52.66	57.13	59.47	44.98	60.15	65.65	69.32	50.03	68.9	61.66	61.08	52.71	70.46	64.52	57.03	60.55	57.8	51.6	48.38	57.92	51.99	66.07	43.71	44.36	71.61	38.7	43.59	57.56	41.01
ENSG00000100399	7.58	14.84	6.79	2.61	10.63	27.87	10.62	12.92	7.07	25.51	24.5	37.79	20.25	15.5	10.75	8.11	5.39	38.51	2.96	31.23	2.52	9.28	2.36	18.38	11.22	32.16	16.74	7.37	16.06	12.43	4.26	17.9	30.91	16.17	12.7	36.21	26.63	31.48	17.34	8.29	13.26	21.4	9.2	31.51	17.58	3.1	7.22	4.65	33.99
ENSG00000100417	75.83	80.09	96.32	72.14	104.61	110.59	70.79	93.54	88.24	109.33	160.19	96.57	122.11	165.19	136.47	128.03	140.19	96.05	109.82	86.89	118.27	87.22	96.47	114.76	120.45	118.41	133.76	147.39	174.14	120.99	108.92	103.07	131.65	126.65	138.37	100.59	123.28	82.94	83.23	133.49	77.84	95.1	135.04	110.01	135.35	96.53	148.29	107.83	104.29
ENSG00000100422	33.53	33.02	124.61	36.19	29.23	20.6	27.68	21.49	59.07	55.27	46.23	41.64	31.17	51.43	75.89	48.41	54.37	58.08	45.66	46.3	44.52	49.73	57.52	44.88	75.24	39.04	54.13	38.9	55.8	53.03	49.78	48.25	61.19	59.06	44.68	56.75	44.52	30.33	50.05	39.91	70.85	66.37	40.97	49.89	47.57	47.5	50.53	33.16	35.88
ENSG00000100426	33.77	16.7	33.2	17.41	16.31	9.79	11.1	10.96	10.56	9.92	6.38	8.24	7.77	5.23	8.46	7.86	7.99	7.67	6.99	7.46	7.63	7.2	6.42	7.98	5.89	3.7	2.87	6.47	5.19	5.52	5.29	4.8	5.15	4.41	4.74	6.72	5.24	4.39	9.45	6.53	7.63	10.63	7.66	5.73	7.59	9.4	12.25	8.03	5.15
ENSG00000100429	114.12	83.8	71.02	99.65	40.55	86.54	93.68	64.1	74.89	58.13	100.21	43.25	74.73	42.24	63.78	46.82	32.25	60.63	65.49	68.91	57.35	33.25	54.17	71.43	25.95	44.3	28.39	63.65	39.7	26.34	37.26	52.83	64.7	31.42	49.56	34.78	60.44	62.38	63.38	54	84.28	50.57	71.89	13.35	80.58	77.61	101.81	70.27	78.03
ENSG00000129465	1.04	0.58	1.86	2.86	0.24	2.67	1.09	1.77	3.87	1.45	1.01	0.52	1.85	0.61	2.57	1.39	2.95	3.01	3.64	2.26	2.76	0.76	0.97	1.68	0.51	0.44	0.38	3.02	2.2	0.85	0.29	4.9	1.06	3.69	1.16	1.86	1.52	3.45	5.04	2.27	4.53	1.46	9.44	0	1.8	0.85	3.62	0.64	0.77
ENSG00000090060	104.29	43.59	42.24	73.34	18.38	54.38	67.71	49.94	51.12	20.64	42.9	53.77	70.01	15.17	31.97	54.78	32.55	51.57	61.35	46.33	47.92	56.01	56.95	66.48	35.58	31.22	17.79	52.96	18.85	43.57	32.05	35.77	42.66	18.22	54.78	47.39	44.14	37.45	56.72	46.33	68.13	49.9	61.72	67.47	52.71	71.18	94.42	41.41	53.37
ENSG00000087303	2.75	2.63	5.27	5.95	4.12	5.62	15.52	5.35	5.85	4.18	2.28	4.5	3.49	0.92	2.5	2.52	2.65	2.7	4.9	4.18	3.91	3.36	3.66	1.74	0.97	2.33	0.72	2.86	1.11	1.82	2.98	2.65	3.2	14.37	2.63	3.16	2.41	1.79	4.04	2.47	5.31	1.77	9.52	3.26	2.05	2.57	1.87	3.25	2.93
ENSG00000023608	6.57	7.34	10.02	11.56	1.02	8.58	9.19	6.47	4.53	4.91	6.6	5.45	10.39	1.28	3.1	5.07	1.55	4.76	6.83	8.48	8.23	5.36	5.89	5.9	5.39	3.09	3.22	7.09	3.09	7.57	3.69	8.36	1.98	1.56	7.74	6.53	5.98	7.87	4.59	5.98	13.39	4.94	9.73	0	8.88	11.34	13.44	5.82	5.45
ENSG00000092201	59.81	48.39	27.74	42.88	25.25	16.96	32.52	22.98	35.84	15.83	27.66	35.86	25.4	15.43	17.43	31.48	15.31	31.72	31.97	36.04	35.68	42.22	42.44	24.29	36.22	26.78	17.65	33.93	13.93	37.65	23.38	29.28	31.35	18.56	43.55	38.97	32.87	23.19	39.39	31.35	36.88	43.01	27.44	26.49	29.21	30.56	21.6	30.18	24.04
ENSG00000100442	259.64	189.34	87.17	266.23	68.77	287.6	219.48	315.67	220.78	167.05	248.92	235.51	238.51	104.81	154.32	276.28	147.86	178.8	259.4	246.94	256.58	223.78	230.45	267.8	125.04	295.28	100.38	351.16	113.16	251.65	197.71	341.26	346.28	60.4	311.83	295.69	261.9	238.41	179.84	271.28	218.55	255.26	265.58	208.78	285.04	285.93	284.19	221	316.36
ENSG00000100473	57.17	51.63	10.21	22.21	33.79	29.81	26.68	18.32	22.46	21.37	10.1	12.9	13.04	5.99	12.81	9.92	12.84	21.97	18.29	4.73	10.06	9.57	6.98	1.97	6.5	9.94	3.24	10.45	7.24	9.61	16.48	8.89	3.32	11.12	11.18	8.46	7.72	5.27	17.03	11.48	17.93	6.62	14.22	6.09	7.93	13.99	9.93	8.1	10.95
ENSG00000100478	25.55	19.78	10.56	23.01	5.51	23.11	17.89	22.77	12.21	18.73	19.04	25.46	17.49	8.03	18.1	26.26	22.33	18.53	35.25	20.94	36.53	31.75	17.09	7.94	24.22	21.66	18.8	15.28	15.26	35.43	27.61	19.87	17.36	12.57	15.35	25.81	26.45	14.68	19.09	27.91	18.89	22.18	26.22	32.66	30.75	27.34	21.21	26.53	14.68
ENSG00000100485	38.66	20.13	10.39	19.8	12.42	14.74	25.71	21.41	13.81	7.72	12.49	18.54	24.51	5.64	8.39	14.08	7.55	23.13	18.46	19.08	11.07	13.72	9.16	17.57	9.77	8.61	4.8	12.21	3.07	9.11	8.69	10.59	12.97	5.32	13.75	17.16	14.42	18.45	17.81	11.48	19.43	15.82	18.46	19.07	17.22	13.84	16.88	11.86	17.68
ENSG00000100504	3.49	6.21	37.54	39.15	3.86	12.6	15.34	6.06	12.23	6.76	13.33	7.59	30.79	3.89	11.25	6.28	11.05	11.28	9.41	9.38	12.01	7.15	5.13	17.96	5.16	5.12	3.5	9.26	7.39	3.64	8.03	7.92	2.37	12.41	4.78	7.2	8.36	42.17	50.8	8.33	11.93	3.4	21.76	5.28	10.49	7.79	33.06	5.26	8.54
ENSG00000100522	26.19	12.21	10.43	14.03	4.76	3.21	11.21	1.98	12.66	7.34	8.46	11.6	9.06	4.25	10.31	12.44	8.27	14.78	14.75	19.74	11.59	20.66	16.27	4.7	6.46	6.17	4.28	8.49	5.14	12.72	9.81	11.77	8.9	5.17	10.56	18.24	13.63	0	14.97	10.34	10.17	12.32	9.71	12.09	15.18	14.29	11.09	7.14	8.7
ENSG00000100532	23.61	13.2	18.8	48.11	4.6	36.15	39.95	28.84	20.17	17.65	28.6	19.12	28.01	24.7	20.22	36.28	24.45	24.26	23.78	30.03	24.16	21.67	25.67	38.95	19.88	35.04	21	36.33	20.13	40.84	40.91	39.13	42.77	13.99	31.84	41.1	31.67	43.29	27.55	26.87	66.2	27.76	37.59	40.87	35.92	63.6	38.73	19.92	44.09
ENSG00000100564	24.22	11.95	34.02	42.19	14.64	32.46	21.94	31.07	36.28	23.16	23.01	34.78	30.42	34.11	45.42	38.83	40.47	28.93	31.1	41.41	41.61	33.48	32.74	31.08	43.54	35.03	26.21	56.76	28.15	45.91	60.84	51.86	36.77	27.34	44.52	60.37	33.35	48.49	28.49	39.69	36.1	29.74	45.78	47.34	18.99	37.3	26.23	19.23	31.92
ENSG00000100567	68.36	42.93	54.64	80.41	11.79	68.02	69.95	57.35	40.51	29.48	46.2	54.5	53.34	27.64	36.52	70.26	29.13	32.8	59.05	59.61	57.95	48.91	39.86	65.43	30.07	53.51	9.29	55.19	20.04	50.55	54.97	60.27	73.59	15.7	68.66	70.31	54.78	77.71	52.29	58.03	78.12	40.36	68.24	43.69	52.42	64.55	50.76	45.17	70.69
ENSG00000100580	13.6	12.87	3.75	1.44	9.78	5.38	8.79	5.71	13.65	7.04	8.11	9.91	10.24	2.44	14.83	5.59	14.86	13.66	4.9	14.19	5.56	14.34	14.95	6.76	7.22	2.66	6.16	6.1	3.69	8.57	11.76	7.05	2.13	5.21	7.59	6.24	13.47	3.47	10.16	5.14	6.4	7.68	10.15	13.04	8.49	7.71	5.98	4.49	4.69
ENSG00000100583	3.19	2.45	1.19	2.75	2.61	4.1	2.23	2.99	4.96	4.03	1.03	3.97	3.55	1.86	3.39	2.77	3.97	2.89	4.35	2.51	2.65	3.71	3.72	1.61	3.15	1.01	0.88	1.55	0.56	3.7	3.14	3.5	1.35	2.84	2.67	2.62	3.27	1.99	1.14	4.14	3.83	3.15	2.18	9.94	3.24	3.59	4.31	2.45	4.77
ENSG00000100591	293.04	212.7	257.04	584.26	205.95	407.45	258.54	305.88	232.87	302.35	282.7	311.44	385.15	341.34	346.66	340.42	286.52	249.45	254.54	275.09	349.55	288.89	278.28	358.7	375.04	330.68	462.88	345.75	354.78	407.8	341.45	309.49	465.06	291.9	351.89	348.89	318.38	246.59	259.61	310.64	245	294.47	269.71	257.34	429.47	277.51	753.47	288.49	289.46
ENSG00000100596	12.87	10.65	13.53	12.41	11.06	6.05	10.45	5.97	14.39	11.26	11.64	24.88	13.74	8.42	6.57	9.63	12.43	13.82	10.44	16.21	11.96	12.6	11.19	5.41	14.21	9.17	6.44	6	5.09	11.53	10.99	10.41	7.69	8.05	14.94	23.35	9.64	17.52	22.36	8.16	11.25	11.91	14.67	27.8	8.65	8.43	14.06	10.42	4.61
ENSG00000100601	12.18	7.66	10.91	15.73	4.98	8.39	12.79	6.75	8.51	8.54	8.85	8.35	8.81	11.11	10.79	10.99	8.11	9.94	10.09	8.48	13.64	11.93	6.62	9.84	9.01	7.75	17.37	6.66	12.36	10.81	11.12	9.75	16.03	5.95	7.65	10.45	10.69	10.74	11.31	9.56	6.65	10.74	8.31	12.65	7.94	13.08	8.22	8.41	4.55
ENSG00000100604	171.05	360.55	93.72	421.92	467.2	571.19	311.12	444	351.67	405.72	665.35	431.17	338.96	572.58	317.41	467.5	318.11	214.06	314.46	550.47	472.98	468.53	471.84	632.16	450.59	889.82	1035.62	699.77	375.02	680.75	349.87	941.68	1598.93	403.27	619.33	673.32	844.92	655.41	258	461.15	202.92	796.19	312.64	525.03	614.64	218.4	413.23	532.75	318.74
ENSG00000100664	212.17	127.73	99.25	221.18	59.48	115.93	104.47	143.19	168.72	100.32	147.13	201.23	154.19	49.97	99.73	212.82	125.57	204.19	225.02	167.55	215.98	239.96	232.44	141.72	161.42	179.93	107.74	208.94	65.88	241.46	141.9	200.28	221.49	79.44	254.17	234.72	162.25	159.12	202.49	193.19	167.5	212.74	175.85	211.54	206.19	214.73	266.33	165.78	171.15
ENSG00000100711	80.63	99.63	70.67	108.4	43.75	170.16	212.16	129.45	111.5	126.16	155.45	119.9	158.56	135.95	159.44	142.5	105.3	164.16	137.93	109.63	115.7	99.97	89.69	143.97	108.99	108.09	102.41	175.68	144.11	125.75	123.53	137.67	119.28	97.09	107.42	113.34	164.41	105.82	99.6	139.97	136.4	126.25	119.89	75.64	124.38	166.04	182.53	135.67	151.54
ENSG00000100749	18.99	11.38	7.69	14.48	2.85	12.46	21.36	17.1	12.22	4.94	18.4	12.84	15.09	6.73	3.36	19.94	8.19	12.3	19.04	18.4	17.56	9.63	18.96	21.92	12.03	9.78	6.99	15.16	4.31	15.19	6.48	21.95	20.27	2.89	21.57	13.36	18.65	14.64	12.01	13.34	15.41	14.16	16.45	8.45	16.9	12.21	10.77	19.97	20.26
ENSG00000100842	29.7	15.8	156.48	18.48	8.73	23.24	29.85	15.35	17.56	30.89	21.05	63.5	25.58	14.55	16.63	9.73	17.01	31.97	13.07	37.83	9.54	10.09	9.23	13.16	11.57	29.25	14.81	19.55	18.93	13.61	19.65	19.38	29.94	27.93	28.6	57.19	35.05	44.15	11.77	10.21	28.89	22.44	25.57	5.97	17.21	25.87	15.21	14.11	37.21
ENSG00000100889	4.2	6.58	18.81	10.13	4.91	12.04	10.88	15.17	8.61	10.6	11.4	6.7	13.08	16.43	15.48	10.33	12.53	16.15	11.14	10.78	9.76	9.46	6.26	13.91	10.97	7.48	10.51	15.51	12.45	12.16	9.91	9.06	10.84	14.03	4.22	5.26	10.08	18.13	20.64	14.46	18.72	6.4	13.75	12.21	9.01	19.25	11.74	6.7	16.94
ENSG00000100906	53.34	75.74	1442.34	111.39	23.34	83.39	158.26	69.26	39.45	46.04	107.2	50.62	109.99	52.41	117.59	47.96	61.93	104.4	91.11	84.9	95.55	31.5	46.29	163.49	50.91	94.77	67.91	78.16	216.89	48.1	216.97	178.67	67.87	160.1	68.51	60.64	76.8	618.52	111.28	52.73	90.27	52.08	294.19	119.58	106.97	56.81	102.69	44.68	82.2
ENSG00000100911	32.53	31.36	102.49	97.36	11.53	37.1	67.54	58.12	23	27.05	35.51	28.51	53.9	24.24	36.57	27.58	26.29	26.85	45.49	43.48	29.79	34.6	20.91	40.79	25.44	19.98	23.11	49.06	40.38	21.45	26.48	43.87	37.34	31.1	33.8	16.74	31.51	45.63	47.44	29.42	63.72	31.02	60.55	9.32	46.81	56	59.13	32.35	72.05
ENSG00000100916	34.07	38.56	9.92	20.03	19.41	22.6	25.6	41.35	53.17	15.84	26.3	40.16	28.1	12.13	24.14	46.63	25.97	51.84	55.08	39.05	41.37	51.67	50.59	28.2	31.54	19.03	13.45	28.26	15.25	55.83	31.29	34.17	25.97	17.72	42.2	37.2	34.53	20.01	46.06	37.22	31.95	30.48	43.84	27.62	42.38	48.28	18.47	50.99	26.07
ENSG00000100941	117.12	96.81	32.84	146.63	18.56	75.61	164.72	78.46	81.62	15.42	69.75	65.47	74.32	12.49	20.93	56.07	20.25	65.02	108.81	72.53	65.59	68.81	65.18	60.9	16.57	30.23	11.99	87.1	13.66	15.58	22.9	56.31	65.73	15.21	77.3	48.64	61.99	56.65	77.41	54.53	75.66	68.4	94.5	59.24	67.89	80.02	66.62	56.87	71.51
ENSG00000020256	19.34	23.84	21.69	8.97	24.35	15.96	13.54	20.45	16.43	16.38	19.13	20.26	15.46	21.9	15.94	19.41	16.82	22.05	16.32	13.96	13.37	22.23	22.56	14.35	18.49	13.73	21.5	9.97	13.93	18.55	15.97	10.65	16.89	14.87	14.98	13.9	14.79	7.87	12.86	21.78	15.18	14.26	16.52	14.76	15.33	9.05	12.53	20.1	12.97
ENSG00000100983	27.04	44.02	33.73	32.29	33.13	39.31	47.54	50.39	23.52	36.39	52.02	30.54	37.97	53.34	40.88	37.9	37.56	32.69	44.99	39.89	35.51	27.66	32.86	33.99	41.77	47.4	39.8	43.8	52.17	43	34.11	40.11	42.87	32.47	41.58	30.13	41.85	43.9	38.81	38.74	33.61	29.17	42.64	37.45	42.15	33.93	28.62	33.92	49.37
ENSG00000100994	136.3	172.47	139.56	72.22	229.94	104.41	122.66	102.14	113.88	140.9	103.14	96.91	103.23	173.22	119.6	111.18	140.04	211.73	114.73	198.92	117.88	128.17	128.39	201.4	178.56	137.96	217.29	117.01	211.96	177	171.46	204.78	171.18	217.85	154.58	159.08	195.37	236.43	149.02	118.25	135.08	125.03	96.2	137.7	139.97	110.44	104.81	155.24	103.07
ENSG00000101104	3.06	8.32	13.33	7.84	1.84	11.58	7.97	5.37	4.62	6.38	7.92	5.45	8.96	0.51	2.79	3.04	3.73	6.03	11.27	7.85	4.36	3.64	3.54	5.31	0.86	1.11	0.32	2.98	1.54	0.96	2.46	4.72	2.38	0.62	4.89	3.66	2.82	2.91	10.26	4.3	8.03	3.46	11.95	0	9.39	3.22	6.12	7.25	7.19
ENSG00000101160	16.55	17.89	111.35	50.92	14.95	36.5	23.17	21.06	34.96	40.83	28.51	25.29	97.2	41.88	52.39	31.26	55.64	47.22	52.49	37.95	59.33	29.17	27.42	60.62	36.44	53.34	61.71	66.48	72.42	73.53	53.33	72.91	99.69	120.8	69.58	59.27	70.39	115.42	85.76	28.33	44.36	73.48	111.08	36.67	78.02	44.24	86.89	42.65	98.89
ENSG00000185019	10.43	9.72	10.08	16.08	14.16	13.87	18.43	17.27	13.89	18.94	11.87	16.34	19.45	25.53	14.78	18.05	26.1	15.49	15.88	25.75	17.81	19.46	19.44	26.09	18.85	24.85	30.34	20.76	27.34	22.52	24.85	23.11	25.31	18.36	22.73	19.87	20.35	20.62	23.84	19.81	11.29	17.1	13.56	30.95	23.32	12.19	12.62	20.12	8.9
ENSG00000101220	99.61	123.44	61.09	83.45	166.05	172.16	122.51	178.94	140.49	180.39	115.66	110.68	126.97	235.83	183.15	123.03	160.61	88.86	120.72	76.95	124.22	73.81	82.79	77.22	102.85	98.17	104.02	146.51	143.45	100.74	121.81	64.44	85.05	113.88	74.37	59.46	73.27	107.29	106.93	190.47	137.64	82.81	109.39	111.84	98.31	123.38	70.1	94.99	154.83
ENSG00000101276	1.15	6.73	4.1	0.39	1.87	7.58	9.62	3.9	2.85	3.21	7.03	3.14	17.84	1.67	15.83	0.92	2.85	12.47	3.13	4.16	3.42	1.68	1.42	17.12	2.26	2.43	2.11	6.12	9.7	0.31	0.32	15.06	2.33	7.74	1.92	2.39	4.02	2.38	6.87	2.19	4.51	0	8.68	4.76	11.29	4.22	14.19	0.7	5.13
ENSG00000101327	4.22	0.59	12.61	0.73	1.48	17.85	1.48	10.08	12.46	7.1	18.42	17.36	3.76	25.9	17.96	18.62	6.75	6.89	6.59	14.32	8.41	9.82	13.12	2.56	4.16	2.69	3.88	9.23	12.67	9.8	10.09	6.41	1.43	9.01	7.66	3.78	9.27	1.75	29.56	15	1.85	30.39	6.4	8.77	17.75	9.5	118.67	13.6	12.62
ENSG00000101400	31.92	44.03	49.25	56.08	65.88	131.01	170.23	129.12	58.18	71.3	145.06	60.98	226.31	202.58	184.74	121.14	118.27	159.79	118.66	122.69	98.55	55.75	56.53	210.22	104.39	94.75	160.15	200.1	207.27	105.8	119.31	73.9	106.99	170.97	92.34	54.94	159.74	93.65	125.58	107.26	213.43	62.76	117.77	101.68	146.49	215.1	158.8	84.23	269.43
ENSG00000101417	4.09	6.86	7.33	2.82	13.38	4.51	12.88	8.36	16.51	17.2	7.93	8.15	9.1	5.97	15.94	8.74	21.78	11.87	14.35	12.88	9.5	7.01	6.35	9.91	8.06	8.67	6.02	5.96	4.33	4.47	9.19	9.65	1.39	10.18	3.42	15.87	8.38	5.09	11.69	8.94	7.15	8.08	11.16	8.49	10.67	1.67	3.9	5.02	3.05
ENSG00000101421	151.96	223.46	331.54	288.48	188.41	339.49	298.22	323.83	257.94	326.72	324.67	292.16	319.43	359.16	309.48	310.81	252.38	273.41	253.8	272.45	262.14	270.65	254.98	246.53	338.56	342.97	343.42	432.56	304.85	375.19	283.12	353.36	343.03	268.81	301.82	301.4	335.43	344.7	223.61	334.03	309.53	255.93	279.37	218.72	323.19	277.11	247.71	281.94	402.16
ENSG00000101438	26.1	68.11	113.39	71.22	103.31	33.86	40.13	41.87	123.69	128.57	61.84	64.78	56.02	126.14	171.92	62.65	129.77	149.63	83.42	29.51	80.87	74.67	82.36	12.82	87.8	83.34	125.43	111.42	93.92	78.57	66.16	24.5	80.32	120.81	67.41	63.24	55.12	20.82	65.23	91.44	202.63	94.17	84.74	99.94	33.52	95.5	31.85	49.94	82.57
ENSG00000101444	51.97	45.12	56.36	40.04	103.53	55.29	52.67	52.22	40.79	63.27	36.67	57.25	51.12	106.63	53.79	57.75	70.91	44.65	43.73	49.03	47.22	49.55	47.16	45.31	76.19	64.96	68.95	51.17	76.74	70.98	65.73	33.66	53.43	79.25	55.72	58.37	54.03	61.89	50.42	50.06	44.83	45.16	46.04	45.46	53.91	41.41	36.05	54.13	37.8
ENSG00000101464	17.29	13.12	25.07	11.06	19.04	23.6	16	16.42	11.89	15.23	14.36	19.69	17.58	23.44	10.94	12.87	16.66	13.89	15.89	10.47	11.89	13	12.66	20.46	13.09	16.76	10.45	19.2	17.87	16.53	16.66	11.24	22.65	9.22	12.75	18.8	13.01	14.35	13.06	12.14	14.03	12.2	11.98	15.39	19.33	17.69	15.69	13.26	14.76
ENSG00000101473	53.84	63.98	51.24	102.58	81.37	161.4	103.67	111.27	84.15	126.42	115.23	103.55	120.53	174.42	152.62	120.51	103.37	98.87	108.91	86.41	98.3	93.5	83.11	101.97	121.93	122	151.69	121	147.25	121.79	110.65	96.43	132.03	102.88	107.05	90.39	110.79	85.21	80.29	125.94	119.85	87.37	97.96	97.86	127.27	98.46	119.14	96.02	143.27
ENSG00000101474	105.88	127.79	148.04	114.3	171.35	152.33	113.9	142.6	136.77	204.89	156	164.72	145.93	248.46	179.34	188.75	199.91	135.35	159.1	164.83	159.44	175.11	172.48	162.23	232.64	185.06	236.61	208.3	222.35	239.47	210.46	189.35	170.61	205.17	213.65	207.33	169.65	210.11	149.8	166.83	164.76	145.02	159.35	139.47	165.4	135.26	132.02	164.01	120.55
ENSG00000091164	231.15	132.36	135.27	223.18	42.94	180.83	120.24	143.03	137.26	102.54	105.56	152.66	122.26	95.42	126.97	138.93	112.74	103.71	111.49	117.83	131.28	101.36	136.12	138.02	145.98	167.69	120.24	141.64	104.83	163.8	124.18	160.24	163.97	89.76	152.31	169.57	128.22	119.46	105.05	126.79	108.72	114.22	137.93	142.7	140.44	117.76	188.65	91.71	105.39
ENSG00000101608	34.43	42.88	171.98	153.11	20.48	130.01	150.13	71.49	53.48	66.7	48.54	63.18	107.25	40.22	109.81	56.05	72.26	68.13	100.09	53.08	104.95	39.85	27.23	156.82	33.95	69.02	42.62	100.39	108.26	58.14	103.81	165.69	53.17	139.1	54.16	71.01	65.04	313.18	142.23	65.84	142.27	49.47	263.89	26.01	71.67	84.54	118.29	30.73	231.47
ENSG00000101751	33.42	21.33	6.51	19.52	6.96	20.03	40.95	20.06	13.32	3.67	14.08	12.49	12.93	2.97	5.66	16.51	4.9	15.55	22.67	17.78	10.37	16.72	12.64	14.09	3.4	10.48	2.41	15.89	3.59	8.53	5.72	13.72	12.34	3.87	11.15	11.49	12.55	15.38	23.26	9.73	19.05	8.2	19.61	10.57	13.69	18.43	14.3	11.82	16.28
ENSG00000067829	111.79	125.02	126.02	114.73	137.52	145.06	114.21	99.54	97.8	139.44	130.45	119.37	115.73	187.2	126.11	145.11	142.59	102.61	119.21	116.61	119.66	115.61	97.81	120.75	127.65	171.23	182.18	144.12	179.53	140.84	145.54	162.29	211.57	161.39	133.69	122.57	156.23	164.79	96.49	134.61	108.67	142.93	130.75	99.52	105.79	108.29	90.55	108.5	170.41
ENSG00000077713	9.52	7.1	3.79	12.02	1.48	3.5	13.33	6.49	1.97	3.56	3.08	3.95	9.88	0	3.37	5.94	3.38	8.06	12.37	3.84	3.16	2.33	0	5.13	3.91	2.69	1.17	1.54	4.48	5.2	1.78	6.42	3.23	3.38	10.63	1.89	0.93	5.27	13.6	2.6	4.16	5.37	11.55	6.59	3.68	2.6	13.1	1.95	14.22
ENSG00000101843	79.46	87.53	70.82	107.02	46	95.02	93	94.6	75.89	85.78	63.6	81.56	111.87	44.33	79	90.65	86.76	86.03	86.01	86.76	94.48	74.32	70.74	91.04	92.37	104.6	65.46	111.8	46.04	101.72	92.65	95.16	85.4	36.26	87.36	109.02	83.99	86.65	85.4	79.05	88.1	85.01	93.5	93.61	88.68	96.09	111.47	76.41	77.95
ENSG00000101846	10.6	18.56	5.23	6.35	13.14	5.76	7.1	11	27.78	12.15	14	24.58	11.49	10.5	21.23	26.36	19.97	23.07	24.45	23.67	27.24	42.66	39.81	10.8	30.68	32.84	19.34	18.82	14.64	43.31	26.17	21.14	23.49	15.4	26.76	24.49	16.73	8.42	26.35	29.72	17.32	45.27	9.23	40.22	19.51	22.64	7.32	24.33	14.46
ENSG00000101849	1.66	4.02	28.1	8.39	4.66	6.1	6.59	6.79	4.81	5.9	5.36	6.9	15.76	4.85	8.63	5.92	3.93	12.05	6.48	9.12	3.68	5.42	4.81	15.21	2.73	1.88	4.07	3.23	5.47	2.12	7.16	2.24	6.39	9.05	4.02	3.97	7.78	9.65	15.82	4.54	10.16	7.5	9.74	29.9	4.49	7.25	11.95	5.1	10.75
ENSG00000101856	136.48	154.71	193.14	193.18	109.2	222.62	153.14	210.3	212.55	249.49	219.83	243.15	113.13	143.03	143.08	203.85	199.17	122.06	169.12	240.93	187.42	193.14	192.82	96.68	138.24	199.77	82.55	198.04	88.4	222.64	207	296.23	123.2	118.29	205.54	273.41	222.12	195.57	129.28	227.77	132.35	118.18	260.78	147.57	124.62	151.47	162.66	318.92	94.95
ENSG00000101958	84.98	66.46	13.49	31.52	31.1	16.6	22.05	17.42	34.34	17.99	8.83	19.55	9.52	4.51	13.48	13.34	15.19	37.51	7.88	7.77	9.07	17.75	14.03	0.48	6.74	6.55	4.37	7.51	5.03	9.41	9.69	5.61	6.86	4.65	8.95	8.51	8	1.97	12.23	14.29	25.97	7.71	12.61	12.34	11.02	19.45	5.28	10.58	7.99
ENSG00000101972	31.18	24.46	8.66	20.14	11.43	14.64	23.19	14.17	14.39	4.86	15.25	17.91	21.77	4.17	8.75	13.89	6	26.23	17.73	22.55	11.93	15.27	14.8	19.6	7.04	9.37	2.39	13.05	5.81	13.48	9.37	13.29	13.39	6.16	14.74	16.16	14.32	10.25	32.05	10.53	25.55	15.76	18.38	18.89	16.94	15.42	22.83	10.63	21.99
ENSG00000101986	7.7	7.65	10.98	5.6	8.4	8.18	6.59	6.12	5.58	6.96	7.74	4.69	5.71	6	6.97	4.8	6.38	5.59	4.34	5.6	3.98	3.98	1.86	4.49	4.22	3.27	2.52	4.57	4.23	2.1	5.05	2.88	2.62	7.3	3.1	3.83	4.26	8.88	9.53	6.31	6.73	2.66	8.56	5.33	4.71	4.2	3.53	4.2	3.2
ENSG00000102057	6.11	17.35	5.9	4.86	18.67	3.46	4.94	4.49	8.18	8.17	10.02	5.39	2.93	8.24	4	8.04	8.35	5.8	5.87	6.38	6.87	5.98	4.09	4.94	5.1	7.97	6.57	4.11	6.3	4.62	5.55	3.49	3.19	10.36	4.46	3.93	6.88	4.68	10.21	4.88	5.75	4.51	5.13	3.91	4.36	4.62	5.08	4.9	4.21
ENSG00000102109	659.31	1080.6	1119.62	2469.54	1555.74	4061.74	1119.36	1943.93	1313.29	3232.33	2454.57	1022.58	1298.09	3222.22	3241.27	951.47	1817.37	1336.17	1426.77	1407.42	916.46	508.41	432.66	1541.57	611.43	2704.8	1037.13	2406.72	1317.4	936.43	1516.97	3431.27	817.43	1230.41	837.06	1716.86	2042.68	2271.6	598.16	1834.74	1332.48	946.52	967.12	975.79	537.4	1294.94	957.77	2483.03	1680.44
ENSG00000102221	13.67	3.14	6.49	3.62	1.64	3.35	2.95	3.82	2.61	2.56	2.26	3.14	3.12	0.61	3.23	1.69	1.74	5.59	1.37	3.57	1.4	1.2	2.83	1.7	1.21	0.89	0.26	2.38	0.74	2.3	2.76	2.36	1.91	2.49	2.54	3.56	2.67	0.58	1.6	1.34	3.68	2.57	2.55	1.46	2.24	2.01	1.34	1.94	3.67
ENSG00000102226	313.18	353.53	261.17	160.41	420.6	239.69	239.13	281.58	341.53	319.39	346.36	269.72	278.04	400.87	333.95	348.77	413.71	459.72	331.3	380.57	355.42	361.69	375.88	307.54	349.46	335.91	622.31	276.79	548.42	379.41	409.2	351.28	330.16	589.12	359.43	317.81	385.14	341.69	410.19	391.12	336.18	372.85	265.91	318.39	347.9	302.44	273.77	427.31	318.13
ENSG00000102241	169.48	165.04	81.11	191.32	59.68	146.33	182.52	167.5	121.91	56.15	122.85	116.37	156.95	50.2	68.09	137.83	76.88	143.53	164.1	107.25	145.08	111.36	112.6	117.28	83.35	123.78	54.9	184.01	45.21	153.05	81.81	138.6	178.76	54.77	170.83	130.45	133.83	143.4	104.5	131.57	146.34	112.12	139.42	156.65	135.13	148.32	159.9	109.22	200.47
ENSG00000102265	18.89	18.49	614.86	305.83	41.93	159.7	165.34	35.42	26.41	37.08	15.26	25.89	100.87	35.86	40.16	45.44	60.38	58.25	121.55	146.44	78.39	9.25	38.15	305.3	25.61	88.12	27.81	41.31	756.67	64.5	246.88	426.73	25.67	446.59	36.9	25.37	77.4	988.16	140.36	25.8	70.17	26.66	277.84	39.24	120.46	34.79	137.97	34.78	127
ENSG00000102393	31.93	17.5	32.9	60.81	16.97	32.21	28.49	26.04	13.61	17.2	20.22	18.41	18.39	16.45	25.73	19.41	17.79	14.99	20.02	18.81	19.12	12.57	14.78	20.74	16.67	26.55	17.05	22.51	26.07	19.84	17.24	18.57	48.06	23.15	19.92	21.68	15.02	19.23	22.18	18.13	22.43	18.73	27.34	7.8	22.14	21.01	23.46	15.75	21.51
ENSG00000102471	31.16	30.82	12.4	25.31	28	48.74	43.63	69.16	85.36	67.19	89.29	112.66	46.21	27.53	37.93	94.36	80	52.74	74.76	87.08	85.39	133.37	126.56	39.37	64.58	53.52	28.22	41.15	29.32	96.45	69.15	73.25	47.22	29.53	72.22	95.85	66.86	21.22	67.11	87.72	27.93	96.93	70.73	99.56	74.09	64.72	33.99	118.63	27.45
ENSG00000006194	33.46	34.11	45.13	41.75	26.67	30.67	25.9	34.08	33.5	33.99	30.51	32.95	26.62	30.34	27.33	28.4	30.19	31.69	35.3	36.8	38.67	29.48	33.26	29.26	33.37	35.38	29.55	29.83	38.89	32.04	34.95	33.97	27.27	31.62	31.63	34.3	24.88	23.53	33.74	28.81	24.77	34.21	31.03	35.97	45.4	25.77	37.99	28.5	28.22
ENSG00000091651	13.83	16.66	9.53	19.06	2.49	9.39	8.19	14.51	10.58	10.14	13.06	9.54	10.42	8.08	5.28	14.79	11.34	7.72	17.43	14.95	19.07	13.55	16.53	7.74	9.97	7.22	3.13	7.24	4.51	9.3	8.97	17.94	5.78	9.08	9.5	6.35	14.95	14.14	11.55	8.72	0.93	4.8	11.62	8.84	12.34	12.19	15.54	16.98	3.18
ENSG00000102879	124.84	175.91	143.82	203.69	283.7	325.8	343.42	248.43	295.34	279.28	317.72	304.75	251.91	449.94	216.24	344.4	275.38	143.61	270.91	144.48	309.75	249.42	240.51	146.21	290.29	234.73	295.57	278.17	346.63	250.05	260.81	186.2	181.18	287.77	190	179.89	232.47	183.73	170.79	381.3	157.59	210.65	297.1	157.16	225.48	236.32	248.64	319.18	221.33
ENSG00000102898	62.82	60.21	107.18	103.03	85.26	116.53	100.52	140.71	117.08	172.75	117.89	120.74	109.14	186.92	135.66	131.1	129.59	82.46	107.31	99.99	152.91	114.23	81.77	103.93	129.76	121.77	114.47	87.21	118.22	104.58	141.22	116.98	83.32	102.08	105.17	108.92	91.04	72.02	82.06	155.25	135.94	92.85	126.99	62.14	138.71	115.06	104.48	124.82	134.05
ENSG00000102924	27.75	28.71	6.63	17.21	25.29	34.68	20.4	13.24	20.69	35.79	23.31	34.58	11.11	35.66	36.39	31.15	13.8	13.09	19.48	19.5	23.03	24.46	21.55	12.33	17.79	11.77	29.62	32.37	15.67	21.98	23.4	18.71	6.6	11.84	14.71	10.77	19.49	6.91	15.07	34.87	126.13	10.96	12.62	11.53	33.78	40.88	26.44	36.62	20.73
ENSG00000102934	33.84	11.52	25.48	15.2	23.37	47.58	47.38	48.14	29.25	181.47	71.28	252.91	57.6	83.34	86.53	35.38	63.73	97.11	41.3	115.46	39.07	41.06	29.25	53.49	68.17	154.7	63.88	58.62	34.26	52.24	47.96	108.12	104.94	61.71	122.33	303.84	109.35	96.49	34.47	46.62	79.71	69.74	82.08	36.67	41.78	36.12	27.09	42.43	175.81
ENSG00000102967	7.48	8.74	13.8	4.68	6.35	9.49	9.04	14.37	10.14	8.39	8.35	6.44	9.68	8.73	12.04	5.45	5.79	5.92	10.6	8.23	6.32	5.99	3.38	8.79	4.36	5.19	4.5	7.27	8.16	6.31	9.17	6.42	4.16	2.9	5.69	6.49	7.96	10.16	15.54	7.43	10.69	7.29	3.71	2.82	5.12	6.68	7.34	7.51	9.14
ENSG00000102978	51.7	38.18	68.73	101.46	33.27	60.23	60.1	60.51	62.42	92.98	71.84	75.34	65.1	87.72	60.83	77.68	76.9	53.07	79.87	78.92	72.53	75.46	71.51	80.39	78.38	87.68	97.63	78.68	83.99	96.45	82.23	81.55	94.76	85.3	75.12	101.89	75.36	94.75	64.11	68.74	51.15	76.52	84	72.94	85.37	71.84	63.8	82	67.03
ENSG00000102981	58.96	55.96	32.89	76.43	98.24	145.99	123.3	126.94	113.75	151.38	146.36	104	105.63	249.65	179.78	134.77	148.77	60.78	129.48	77.43	132.37	89.27	89.17	97.17	125.06	141.46	174.15	171.91	191.1	131.39	136.92	108.28	167.08	105.9	88.76	97.72	112.16	79.87	42.57	133.09	148.49	106.4	103.51	77.36	103.88	121.91	96.08	105.21	171.53
ENSG00000102996	22.9	28.31	44.15	32.66	48.25	33.38	40.23	20	14.23	26.36	12.72	9.41	15.02	30.04	18.79	8.81	16.55	12.53	5.95	12.46	6.67	4.52	6.24	7.79	8.12	7.84	12.42	8.59	9.64	4.39	7.23	7.86	12.28	9.71	11.21	6.72	13.87	8.67	14.01	11.42	24.58	8.62	10.97	11.69	9.32	15.13	8.17	13.56	6
ENSG00000103021	7.83	17.52	5.53	8.34	16.31	10.99	7.48	10.2	21.24	16.37	6.9	9.23	15.84	13.73	14.13	17.51	14.67	14.47	11.11	13.11	19.39	23.36	26.55	10.36	16.5	16.91	8.91	12.46	7.04	19.06	18.01	12.49	12.1	8.61	15.9	14.88	12.5	7.69	16.28	14.4	16.18	17.69	6.91	14.79	11.56	9.33	8.14	11.8	10.64
ENSG00000103024	53.55	74.85	106.59	147.54	70.89	211.55	129.65	142.97	94.25	158.87	178.74	91.17	89.34	178.5	139.13	78.7	112.5	63.12	128.75	142.68	97.76	54.62	49.9	120.78	73.69	124.88	73.89	182.13	102.35	90.19	106.59	185.03	107.62	98.34	83.42	126.52	158	187.08	51	110.92	128.69	90.66	132.6	64.88	109.92	155.2	113.35	106.79	143.31
ENSG00000103035	82.84	116.72	108.83	123.25	83.99	116.91	114.25	122.54	118.88	99.86	117.74	134.98	117.94	92.4	66.92	142.12	144.72	91.34	127.26	109.16	150.68	131.81	117.86	115.79	138.02	161.57	104.85	169.86	92.37	176.03	123.38	126.23	157.57	70.67	123.43	137.95	116.35	127.92	91.37	136.22	96.29	141.65	109.01	110.12	128.2	122.02	84.17	130.63	127.45
ENSG00000103037	35.21	17.78	17.3	32.08	6.63	25.47	29.82	33.69	27.88	15.6	31.19	17.83	17.18	11.28	16.5	20.04	14.12	17.3	34.99	16.51	18.85	20.86	19.41	17.44	10.64	13.97	13.38	19.87	8.02	11.79	13.41	18.76	16.59	8.48	22.82	18.31	20.94	19.33	19.8	24.51	20.35	23.4	25.14	16.52	26.01	19.99	15.15	21.96	10.18
ENSG00000103056	98.25	97.05	80.9	31.6	161.39	40.09	36.67	44.26	54.59	63.83	36.91	50.47	27.73	52.58	36.5	45.81	55.02	25.12	23.96	25.58	32.47	45.77	34.69	14.69	40.33	22.02	28.99	11.36	36.96	23.64	33.57	17.22	22.64	26.46	19.57	14.47	17.99	7.19	30.43	51.08	23.07	54.23	22.84	21.58	23.83	34	18.14	45.15	12.28
ENSG00000103064	20.19	23.09	16.99	19.6	14.15	8.1	17.99	18.77	16.54	19.55	18.38	17.84	12.25	6.43	20.16	15.21	21.51	9.32	24.33	23.12	17.06	16.63	15.4	13.35	12.67	14.79	5.4	12.49	8.42	13.04	11.86	7.43	16.83	11.09	17.93	15.89	15.58	9.91	27.8	19.55	13.64	24.34	17.81	19.06	17.56	9.01	19.23	19.71	10.97
ENSG00000103066	27.38	43.01	33.09	41.76	71.27	33.06	23.28	28.88	36.45	38.38	42.11	34.76	30.16	49.87	24.02	38.67	50.92	25.53	31.01	36	35.92	28.09	30.37	35.29	35.03	31.51	30.7	24.07	30.82	21.72	31.87	30.33	15.94	37.07	33.83	29.18	22.51	24.35	39.49	50.21	18.8	34.21	32.42	10.83	32.12	26.67	38.91	27.2	11.68
ENSG00000103089	2.8	1.04	1.11	1.93	1.31	5.48	9.14	2.54	7.53	60.14	16.27	87.37	7.47	5.99	7.27	7.98	3.97	39.92	1.45	29.37	5.57	5.94	2.9	5.27	14.71	41.92	21.28	6.34	1.97	15.28	8.39	11.95	27.88	7.96	26.54	80.72	23.47	17.81	6.4	3.57	11.41	24.21	8.48	3.87	18.38	0.76	8.88	11.45	23.68
ENSG00000242173	258.98	408.3	71.75	534.29	593.83	702.58	381.33	516.01	426.29	908.69	708.95	560.12	623.68	1131.99	784.24	635.75	568.86	456.12	540.3	474.71	641.66	494.77	519.21	529.62	581.08	883.06	779.08	930.19	790.47	614.04	562.73	737.18	726.44	530.54	554.28	449.43	617.23	488.77	319.67	622.11	539.02	409.11	604.77	338.31	624.44	611.8	363.69	570.14	871.45
ENSG00000103152	44.22	87.99	86.21	119.16	97.23	200.76	154.79	135.65	92.92	132.72	165.53	112.12	105.32	231.65	141.93	136.25	128.39	84.91	131.85	126.65	141.6	80.23	94.54	145.02	134.64	163.24	172.28	192.11	207.44	147.07	129.38	203.44	182.9	145.17	132.1	120.33	158.32	191.12	101.08	115.82	132.99	112.3	131.72	91.85	144.74	139.43	117.28	106.94	178.74
ENSG00000103160	126.88	89.14	50.03	47.06	41.8	37.66	37.58	27.17	46.49	32.84	38.89	35.67	18.82	20.9	31.12	46.95	45.63	41.89	34.89	52.41	35.64	58.14	60.64	26.29	44.91	44.14	28.13	35.57	20.66	58.65	48.91	39.48	33.71	31.8	59.01	57.29	47.6	19.58	38.12	30.66	40.52	43.15	42.91	57.44	42.43	38.61	30.99	38.43	34.02
ENSG00000103175	1.39	7.02	2.5	2.88	5.21	9.23	8.79	10.46	3.47	7.04	4.51	3.48	3.72	20.37	44.48	11.18	14.86	6.07	11.97	8.79	10.19	3.41	6.93	10.14	7.56	14.2	19.5	23.05	23.63	9.91	16.46	13.17	1.9	18.84	8.56	5.83	17.14	11.58	5.58	21.34	36.57	0.79	16.07	5.8	2.43	17.12	6.2	1.71	22.92
ENSG00000103197	110.19	91.76	89	64.11	52.82	74	118.66	79.77	67.47	65.25	86.97	57.91	65.47	58.15	70.67	58.47	58.1	70.62	70.11	85.49	68.63	63.03	61.57	68.15	47.29	65.62	71.41	67.49	72.4	42.7	54.89	78.47	87.03	79.24	64.15	55.84	87.23	80.16	73.3	76.57	80.65	82.05	82.21	50.72	81.97	72.4	68.67	84.25	93.79
ENSG00000103199	12.31	13.77	23.06	11.18	16.48	16.46	11.76	12.97	5.56	13.81	12.29	10.04	10.96	9.48	9.12	11.97	10.73	10.56	9.17	13.29	10.78	11.51	14.61	7.69	11.31	18.04	7	6.53	13.04	10.09	17.62	9.43	9.13	11.94	11.56	12.7	13.76	12.55	16.63	12.84	13.7	13.27	14.26	11.63	11.68	9.16	8.89	16.14	7.52
ENSG00000242612	21.74	32.21	18.82	40.44	24.89	23.97	35.77	32.61	25.66	26.21	24.58	23.83	34.82	43.8	28.5	20.92	32.42	12.62	29.67	17.91	26.7	19.69	20.26	19.32	16.08	43.33	20.8	29.58	24.55	25.53	25.05	30.78	23.63	26.28	25.48	18.82	19.09	31.59	18.02	27.91	16.15	15.95	21.1	13.55	14.49	38.25	20.02	18.68	19.49
ENSG00000103266	206.34	260.95	234.8	351.38	375.31	512.94	389.37	484.79	359.82	571.52	546.4	439.09	458.65	848.16	658.31	483.75	505.04	471.53	505.53	428.61	500.92	348.6	343.33	540.24	486.32	593.31	705.17	735.83	660.63	556.34	490.77	652.63	677.43	504.31	499.15	497.43	542.66	588.19	269.25	520.58	523.97	407.84	468.86	353.19	546.67	452.24	384.68	468.42	854.58
ENSG00000103269	21.64	33.28	17.08	36.74	22.39	53.97	52.49	36.88	49.94	45.94	81.39	45.45	66.03	71.31	55.86	58.25	47.75	50.46	60.27	90.24	61.06	55.62	54.74	76.19	54.48	74.06	66.55	96.89	66	62.91	56.47	91.71	88.73	53.3	76.34	62.74	83.23	70.58	46.38	52.36	62.82	64.56	44.53	28.9	89.6	55.66	87.86	84.89	75.04
ENSG00000103316	242.72	341.21	23.99	211.95	355.02	392.63	288.41	418.33	469.38	352.22	513.51	467.62	403.85	885.43	432.43	916.82	966.32	299.45	835.11	322.55	861.32	569.08	618.61	324.57	923.93	634.92	797.54	850.5	1082.1	845.99	982.32	668.45	442.43	649.54	637.69	453.53	538.71	438.51	306.74	824.11	150.88	246.96	563.93	472.23	373.52	470.72	472.74	647.16	285.98
ENSG00000103326	26.01	10.5	25.02	41.8	6.08	24.43	14.16	16.74	24.24	20.25	22.4	16.56	16.71	16.88	31.74	13.9	16.42	13.63	12.39	16.1	11.51	14.15	5.39	19.85	4.99	14.7	9.57	15.45	8.16	4.74	11.37	19.48	7.85	11.3	8.06	11.21	22.83	16.79	7.43	22.1	11.36	13.05	16.65	0	10.05	15.37	21.1	25.71	8.63
ENSG00000103353	23.7	25.65	41.55	19.45	22.85	11.49	15.53	16.15	22.55	24.59	17.91	18.34	14.36	13.25	22.86	12.4	18.26	16.09	15.33	14.9	17.07	19.25	18.17	7.33	19.88	16.25	15.95	15.19	12.45	22.03	19.27	13.94	15.76	19.71	15.76	17.45	13.87	7.95	20.46	23.69	18.06	21.91	10.7	16.76	14.61	18.57	17.93	13.61	13.56
ENSG00000103404	31.35	19.11	4.93	12.67	15.31	10.22	8.25	15.59	15.82	18.37	14.01	20.79	11.96	11.98	11.69	14.11	14.57	15.22	13.05	17.36	17.06	18.7	17.87	11.81	18.01	16.59	16.83	10.77	10.81	17.26	16.96	19.23	21.62	13.58	15.92	18.01	15.87	11.74	9.43	10.56	10.92	16.23	11.58	25.46	19.4	13.7	12.73	12.59	9.16
ENSG00000103415	119.75	161.93	189.67	162.64	232.14	277.17	208.11	281.38	236.37	307.14	229.9	278.46	211.61	492	247.95	317.75	299.16	219.32	278.16	220.95	318.56	275.26	289.68	227.82	392.7	386.76	467.5	312.8	375.21	432.39	279.71	299.48	443.68	265.66	342.66	328.5	332.52	232.68	167.93	327.1	154.38	286.15	252.37	278.73	295.85	243.95	214.11	277.76	258.8
ENSG00000103550	22.87	25.58	35.73	33.94	23.02	23.28	19.71	21.59	12.02	14.8	25.01	18.41	10.96	9.25	23.69	14.11	15	16.59	28.82	19.61	14.02	9.48	10.93	42.65	10.41	19.4	12.95	17.1	12.42	14.42	13.85	5.93	34.67	21.27	21.6	19.96	13.39	10.23	37.21	11.54	47.67	19.86	26.68	7.31	28.56	28.8	56.99	20.51	52.57
ENSG00000034053	131.88	102.39	129.09	98.11	170.1	134.06	104.29	138.21	134.75	177.03	145.76	161.67	111.86	191.8	137.23	151.66	167.98	130.46	111.35	146.09	165.47	184.46	181.93	141.2	211.87	162.99	239.57	149.35	161.54	182.4	163.97	177.35	168.09	166.86	171.12	174.15	189.25	120.35	102.16	171.89	110.5	183.11	100.91	126.79	120.46	117.44	222.88	194.63	113.97
ENSG00000103653	91.56	73.79	102.95	64.81	101.5	75.66	58.8	58.55	49.82	67.27	55.08	50.98	65.18	59	66.68	37.46	48.44	54.05	46.29	37.63	45.28	37.72	34.52	34.7	47.63	42.84	56.7	53.39	42.78	40.36	41.88	32.36	52.34	58.36	31.72	39.58	42.13	39.84	63.88	52.09	62.36	44.19	58.21	44.6	53.44	45.48	64.56	34.87	59.43
ENSG00000103707	10.4	14.96	11.98	11.77	9.37	20.21	13	18.23	15.69	12.5	21.6	17.4	13.22	11.72	14.22	21.84	9.5	8.62	22.02	13.32	14.8	13.1	13.39	7.8	10.99	18.9	13.67	22.38	12.06	17.45	10.02	20.04	19.69	12.15	18.66	20.4	13.92	21.59	9.77	14.21	12.34	21.81	17.57	15.43	15.5	17.03	11.8	12.77	9.99
ENSG00000103710	2.02	6.77	18.67	13.89	9.42	11.12	24.71	6.87	3.76	19.22	9.12	4.52	27.82	10.6	19.29	5.39	16.47	14.63	22.02	16.12	7.36	1.97	3.76	23.63	3.98	4.28	3.71	6.86	42.7	5.51	24.37	4.76	2.06	45.16	6.19	4.21	9.44	10.88	25.93	6.61	27.32	9.67	24.46	4.19	12.86	15.68	30.74	5.57	12.05
ENSG00000103811	8.81	19.71	84.69	20.42	23.96	32.98	39.83	21.85	19.91	31	31.58	29.15	52.76	43.05	77.79	27.84	47.23	53.47	66.23	48.13	30.85	23.15	10.45	132.07	42.66	30.58	64.86	80.2	95.57	50.34	52.24	23.23	31.57	64.94	48.74	38.26	93.79	141.02	58.61	25.83	86.83	28.49	53.94	26.63	54.8	74.1	109.91	22.62	83.78
ENSG00000103888	3.06	2.17	4.26	10.26	2.67	2.25	16.29	4.31	20.41	8.12	5.93	9.25	4.72	7.39	19.95	10.14	10.72	6.07	21.16	7.81	15.58	16.38	13.69	7.25	10.46	6.06	8.56	5.55	9.94	7.02	22.71	9.22	10.26	80.51	10.7	11.21	8.24	6.1	13.64	10.03	10.52	26.83	32.42	18.65	5.68	13.03	9.72	7.76	9.45
ENSG00000103966	1.99	3.33	29.37	6.5	7.43	10.22	8.35	6.1	8.64	21.44	8.99	9.41	13.26	9.86	20.06	4.51	10.58	6.85	7.36	8.9	9.23	6.32	4.94	10.03	6.61	8.42	6.58	9.17	18.93	5.16	12.28	8.37	8.1	18.01	7.21	5.63	6.98	23.51	14.76	5.7	15.63	4.77	16.57	10.32	7.2	7.32	6.31	9.14	2.97
ENSG00000104064	15.64	14.44	12.59	30.44	5.72	8.99	11.42	7.88	11.4	2.67	6.15	13.89	6.05	3.57	3.37	9.08	8.21	8.88	8.48	7.58	8.58	8.65	7.6	8.24	4.69	4.04	3.5	6.61	4.8	7.06	8.79	3.67	6.93	3.87	8.35	7.3	7.56	9.03	9.71	7.43	4.75	9.21	16.9	11.3	9.06	8.9	13.38	5.42	11.17
ENSG00000104112	175.08	235.91	41.82	351.13	123.11	370.04	627.74	429.28	292.43	161.89	341.93	321.23	531.76	205.83	184.27	462.98	185.08	441.81	311.11	257.8	335.74	358.89	312.77	347.4	241.09	239.02	156.3	377.66	129.23	336.78	182.61	209.77	259.33	130.18	347.57	230.26	338.64	261.16	550.47	328.97	576.42	263.38	274.32	405.41	270.5	500.3	424.32	286.72	341.28
ENSG00000104129	23.83	21.72	23.19	17.63	9.07	29.2	24.72	23.47	24.13	17.82	17.68	21.55	20.42	18.04	20.64	18.4	24.45	23.05	18.59	17.53	22.85	16.85	22.48	17.12	17.84	18.71	22.74	19.73	19.31	17.84	14.39	25	27.58	17.57	18.23	22.13	18.08	14.66	16.65	16.4	28.54	21.42	28.91	14.67	22	23.12	10.09	17.33	39.56
ENSG00000104140	26.13	29.22	16.96	13.3	30.79	8.35	14.32	8.52	8.47	12.1	7.34	8.49	7.08	7.96	5.63	7.29	12.1	3.3	7.97	7.7	7.54	4.45	7.06	3.67	8.4	8.67	11.7	13.25	20.04	7.45	18.51	12.25	19.29	16.15	13.31	8.81	9.97	5.66	4.54	8.07	2.98	7.05	6.2	0	8.56	12.09	5.77	6.97	3.39
ENSG00000104142	22.67	24.42	20.47	21.33	41.72	25.4	16.06	27.13	22.5	41.07	31.43	29.75	25.83	50.36	33.89	30.29	31.02	20.65	24.14	32.81	30.28	27.34	33.32	28.59	35.7	40.32	57.97	28.47	45.84	35.18	37.91	31.12	36.05	45.79	35.63	28.38	33.32	25.93	25.75	35.94	28.99	36.81	24.81	21.82	31.88	25.33	19.48	34.94	21.06
ENSG00000079459	314.3	145.85	103.84	234.7	261.82	149.13	122.65	127.77	119.24	218.12	95.7	183.26	147.87	223.42	134.64	182.45	198.06	156.52	152.19	128.24	157.78	151.67	146.05	107.2	199.07	188.99	241.73	136.45	243.18	226.93	198.01	125.07	128.2	179.49	218.53	179.15	166.99	171.64	76.19	150.95	119.33	138.85	175.77	155.19	128.05	132.82	194.28	142.67	122.19
ENSG00000123908	9.9	6.11	21.21	8	5.58	5.27	9.56	5.59	10.18	7.28	5.74	8.68	4.86	4.19	9.92	5.11	10.67	6.69	3.46	7.78	4.76	9.2	6.37	5.24	9.76	4.05	6.28	4.31	7.47	6.53	7.87	4.61	1.39	8.25	2.67	2.65	3.8	5.95	7.81	5.04	3.58	6.55	4.97	17.02	3.56	6.99	5.42	5.45	2.55
ENSG00000076641	1.24	3.82	12.62	8.57	6.1	4.11	6.09	6.78	6.95	2.44	5.22	4.96	4.43	0.73	3.97	5.65	3.53	6.77	6.79	6.02	2.89	3.65	8.11	8.54	3.06	1.58	2.29	1.81	2.19	3.4	4.89	3.35	2.11	2.21	2.08	3.71	3.27	6.19	13.15	3.06	5.98	4.91	4.15	20.66	1.08	2.54	6.71	4.58	4.64
ENSG00000042832	2.18	1.74	0.06	1.36	0.73	1.53	1.09	0.71	1.55	0.82	1.01	0.62	0.46	0.61	0.52	0.61	0.52	0.38	0.49	0.2	0.35	0.2	0.45	0.08	0.15	0.26	0.08	0.1	0.29	0.17	0.12	0.56	0	0.67	0.29	0.25	0.24	0.26	0.65	0.28	0.36	0.23	0.69	0	0.6	0.09	1.26	0.26	0.31
ENSG00000104221	20.51	18.28	24.5	37.09	35.04	30.15	19.3	22.29	28.67	33.42	37.27	38.65	30.23	39.31	25.44	35.29	34.6	19.06	43.99	42.23	34.04	28.87	32.66	31.59	42.97	32.62	40.57	33.64	47.05	45.17	40.71	42.35	30.92	36.46	42.93	34.82	31.51	34.59	30.04	30.12	25.77	34.37	29.54	34.62	36.04	22.03	27.68	37.37	32.56
ENSG00000104231	27.02	35.25	9.56	28.96	10.76	22.07	21.02	31.38	39.17	15.15	20.04	31.92	32.06	7.6	20.57	33.7	12.08	24.68	49.95	34.43	31.23	31.85	39.79	35.58	16.28	30.55	8.1	35.99	12.01	27.34	25.87	51.28	53.03	7.12	47.47	44.8	26.94	21.6	42.9	25.15	37.61	41.8	51.59	37.42	44.09	27.03	41.95	31.32	31.4
ENSG00000104312	10.45	14.19	21.4	30.17	5.58	21.22	16.03	17.98	11.13	9.49	13.5	12.65	14.17	6.97	7.05	13.56	15.55	15.52	15.13	10.61	12.88	9.26	11.13	20.91	9.08	16.88	6.59	12.09	5.27	10.6	13.98	11.41	8.45	7.78	12.77	12.48	12.81	21.9	14.5	12.23	14.35	9.27	21.13	8.27	14.71	18.73	25.6	16.79	11.89
ENSG00000104324	3.42	8.27	38.41	20	9.57	22.59	40.25	13.58	6.36	11.49	11.03	22.69	30.9	16.62	21.78	10.95	21.42	29.31	33.29	22.61	14.36	10.87	5.66	33.57	14.31	19.79	22.62	24.89	36.15	20.52	31.03	14.58	15.85	54.63	17.15	26.5	23.65	38.28	18.54	10.57	29.35	11.89	40.39	21.28	23.09	27.48	36.87	12.57	33.16
ENSG00000104325	15.22	19.71	39.23	40.84	15.35	57.72	57.78	46.43	18.92	23.81	44	26.75	99.82	24.8	42.02	41.54	31.3	53.47	44.36	55.51	30.32	29.42	25.39	121.06	32.39	38.05	43.05	80.2	36.19	47.71	40.53	51.32	52.8	20.51	43.82	32.52	66.59	82.49	70.52	23.64	80.53	29.85	57.82	29.96	59.45	58.36	87.01	35.4	84.98
ENSG00000104332	9.4	4.3	62.78	10.01	2.4	3.14	4.19	5.24	9.03	13.42	4.97	11.07	3.8	3.49	6.66	3.2	6.07	17.98	4.67	6.21	3.4	6.28	3.72	3.45	4.63	3.62	4.4	8.31	1.81	4.2	9.61	3.46	2.32	4.86	10.97	19.39	6.5	3.55	1.95	3.74	8.96	3.38	3.63	0	2.97	2.1	1.63	2.1	2.55
ENSG00000104381	71.24	80.51	18.81	47.53	41	50.71	52.5	57.26	105.76	40.37	68.8	83.33	61.39	35.47	48.89	109.02	69.77	98.46	115.21	88.28	100.57	138.05	148.63	56.35	82.81	73.77	39.74	80.16	33.34	125.36	70.81	103.65	62.66	44.78	121.36	93.55	72.86	47.94	112.71	89.31	75.37	113.43	87.32	90.35	77.81	76.1	53.81	96.63	63.85
ENSG00000104408	208.58	93.52	70.04	151.48	27.09	96	87.71	74.5	61.69	30.26	63.29	61.1	71.75	28.41	38.25	59.13	29.82	81.69	88.86	59.4	61.94	49.59	52.58	88.84	33.84	59.9	16.18	74.47	25.4	74.26	50.19	109.18	108.65	15.16	68.43	83.53	61.23	87.97	92.16	53.52	81.53	71.08	99.01	47.06	90.38	75.8	130.76	42.53	94.57
ENSG00000104412	34.33	32.33	12.41	44.18	10.55	41.17	59.45	58.51	36.48	19.76	51.36	70.68	86.02	24.27	22.41	54.56	19.89	49.15	54.95	68.72	53.38	44.67	57.81	78.11	22.27	43.67	16.62	66.72	19.13	49.85	40.11	57.87	84.7	12.2	76.13	65.79	67.68	72.75	72.8	41.46	73.43	51.5	77.8	48.79	49.22	77.63	80.89	43.79	85.02
ENSG00000104472	4.08	6.84	23.14	11.24	2.86	8.99	7.14	12.51	8.87	10.29	5.27	22.36	9.07	7.15	13.01	6.54	7.24	17.75	9.54	13.83	6.77	6.99	7.6	13.18	4.02	8.65	7.5	3.96	4.32	7.8	16.05	16.5	8.31	5.8	10.24	10.96	15.52	16.93	6.99	6.69	10.69	10.36	16.08	8.47	11.82	5.01	9.07	13.77	6.09
ENSG00000104524	11	10.46	5.91	9.85	39.59	26.69	26.19	30.01	34.18	45.66	35.54	35.64	29.38	63.62	37.43	35.29	39.85	26.34	38.61	39.45	41.64	20.47	30.76	26.67	30.38	41.99	19.43	29.94	37.28	22.24	45.15	37.1	26.16	37.55	32.55	24.96	43.15	52.07	20.12	36.07	21.16	22.36	24.69	27.43	43.37	39.62	14.67	32.41	37.8
ENSG00000104643	16.64	23.54	10.23	13.15	19.21	6.84	9.94	10.01	22.5	9.61	6.32	11.71	9.15	7.15	10.41	13.34	13.21	10.65	8.4	14.23	10.4	26.12	23.72	5.54	18.82	9.55	6.12	4.76	5.53	13.37	9.9	9.57	5.65	7.66	14.48	11.98	8.59	2.44	12.59	10.96	8.56	12.43	7.42	32.54	6.53	9.61	6.53	15.02	4.39
ENSG00000104671	114.17	81.18	45.45	118.46	29.64	126.4	138.16	124.92	84.07	72.71	83.78	115.89	131.7	60.91	67.92	105.47	85.09	132.92	116.51	93.55	94.51	88.33	86.7	116.17	69.48	119.53	63.28	143.83	43.77	136.29	129.13	122.6	120.65	35.07	131.36	146.4	109.72	141.6	105.52	91.64	107.17	79.55	114.54	70.27	107.84	123.43	84.14	94.28	151.6
ENSG00000104687	30.05	39.91	47.11	34.16	31.59	30.93	25.25	35.34	53.68	40.02	34.95	30.33	34.77	39.93	45.79	37.75	37.35	32.7	35.74	29.85	41.4	29.43	36.41	29.14	40.74	30.58	32.62	26.28	24.39	38.58	42.65	18.24	30.11	29.91	29.35	25.56	23.74	31.81	42.51	35.3	24.95	31.38	37.36	40.58	30.05	28.9	17.65	23.05	26.94
ENSG00000104695	229.27	485.1	402.43	420.56	259.3	354.92	322.25	416.2	371.74	346.7	293.44	370.44	360.13	228.22	376.02	347.2	373.15	433.43	356.91	264.64	344.2	311.24	330.75	334.71	378.87	314.48	347.68	370.5	258.03	458.28	395.36	272.86	329.8	274.75	356.22	367.02	292.76	312.92	351.39	341.13	346.1	264.18	362.88	306.67	276.85	400.84	351.31	289.9	372.32
ENSG00000104765	194.3	181.95	97.86	112.88	66.73	93.78	91.78	134.06	169.44	72.85	124.02	156.32	147.91	49.22	79.63	146.4	99.76	180.01	161.57	116.82	125.11	163.9	157.08	101.2	109.06	160.81	62.02	104.65	45.43	159.86	108.55	129.43	129.62	82.38	159.39	155.81	128.11	100.09	179.28	148.36	116.62	161.85	134.16	145.88	117.37	158.06	115.22	152.27	120.65
ENSG00000088038	66.17	33.4	61.19	42.46	48.76	49.75	59.83	56.97	46.98	41.34	53.01	41.08	34.32	48.58	38.05	40.42	44.04	41.69	42.17	58.25	37.15	35.17	34.06	48.27	32.62	40.08	46.47	46.67	37.63	30.57	31.03	40.28	42.38	36.29	37.98	35.66	43.82	48.03	45.81	47.51	47.92	42.89	45.63	26.7	49.09	34.35	58.35	50.12	36.71
ENSG00000077348	54.76	53.58	35.42	39.29	75.16	87.2	70.28	83.99	58.11	71.64	67.8	75.04	71.06	124.58	64.67	75	67.24	45.51	77.39	50.84	72.7	48.59	51.03	68.21	66.36	104.48	80.59	68.73	89.36	86.62	75.66	75.38	97.65	70.56	66.21	64.01	62.76	83.34	51.5	75.41	49.85	69.53	59.5	52.13	78.02	83.09	43.47	80.5	83.5
ENSG00000256087	24.19	14.31	3.61	30.77	2.39	9.23	13.68	11.42	12.72	2.35	10.82	8.35	13.25	0.27	2.64	6.22	1.65	5.4	9.43	9.47	8.34	6.61	7.23	10.15	1.61	3.55	2.4	8.14	2.3	2.29	3.66	6.9	6.64	1.98	7.01	5.83	7.35	6.57	10.37	7.63	7.73	6.56	11.57	7.73	11.87	6.85	5.91	8.28	8.34
ENSG00000167384	8.94	7.39	3.02	6.42	2.18	7.14	7.89	9	8.45	2.61	9.79	7.36	7.61	2.04	1.1	9.55	3.31	5.07	6.36	5.83	4.9	6.47	3.38	2.83	3.06	3.29	2.29	9.82	0.55	5.73	3.06	2.88	8.71	1.66	7.15	6.26	6.37	6.77	6.66	8.7	7.81	6.14	8.72	3.23	7.43	7.31	5.18	6.67	4.64
ENSG00000090920	1.28	1.11	43.97	1.81	0.42	1.51	0.63	0.52	1.07	1.51	1.16	0.67	3.08	0.56	2.4	0.1	1.86	0.56	1.35	2.54	1.28	0.53	0.32	1.81	1.48	0.38	0.61	0.37	1.94	0.49	1.08	2.16	0.3	7.6	0.46	0.61	0.34	7.34	4.98	1.33	1.29	0.33	4.78	1.33	4.38	1.1	57.04	0.39	1.43
ENSG00000104808	10.83	20.69	4.31	36.05	4.22	12.6	11.37	6.77	12.33	6.58	12.83	6.75	4.82	6.85	6.39	7.23	10.9	5.24	16.19	7.87	6.59	3.53	6.17	8.02	12.46	6.12	7.97	7.89	8.28	7.89	6.59	13.39	6.13	10.91	7.55	5.93	7.92	14.23	12.89	11.83	3.15	3.06	13.13	0	3.66	8.12	5.73	5.54	4.04
ENSG00000183207	120.68	129.44	159.03	178.66	191.67	188.93	145.43	154.66	110.3	171.45	113.96	131.55	143.54	217.87	126.23	149.17	137.63	108.59	115.83	133.8	134.82	104.25	108.5	141.58	144.15	165.33	207.52	173.67	217.44	157.53	154.9	168.22	194.33	169.95	141.5	136.11	147.38	188.35	102.79	144.54	121.19	136.22	128.43	125.34	165.8	110.16	119.38	140.28	140.41
ENSG00000104823	97.87	116.35	124.79	185.25	150.38	209.99	178.4	153.28	101.34	138.43	135.01	104.57	193.8	208.54	154.33	130.07	152.17	157.34	129.96	146.09	109.46	91.52	95.87	185.23	126.48	157.77	173.25	213.36	218.42	142.09	157.59	164.08	162.93	189.31	142.2	125.79	164.1	193.25	119.93	138.73	196.5	93.55	164.16	109.89	156.9	158.75	167.42	132.01	259.47
ENSG00000104824	148.3	127.57	193.74	154.33	133.04	147.58	145.68	136.56	102.05	117.95	126.76	101.87	112.07	132.44	116.41	99.75	100.14	111.22	125.61	104.12	109.06	95.17	82.78	126.09	108.19	108.74	127.27	138.8	152	106.69	106.69	110.14	131.44	136.9	128.34	109.49	115.1	123.12	110.83	104.95	110.86	109.19	136.43	127.01	115.05	107.55	119.1	115.36	140.41
ENSG00000104852	425.34	458.12	623.24	467.44	167.15	638.39	607.19	657.02	415.46	357.04	929.62	432.48	472.58	197.78	361.52	381.75	261.04	374.54	582.38	606.28	386.03	328.32	312.76	548.29	167.56	450.37	199.03	674.98	259.84	167.89	243.89	681.73	557.45	218.49	440.43	396.25	723.06	690.44	406.42	527.2	434.58	524.16	572.19	186.41	469.56	380.28	646.79	590.64	577.53
ENSG00000104859	64.58	43.81	87.15	82.15	23.94	64.56	65.11	58.99	43.06	40.8	84.56	58.57	38.69	25.14	45.46	37.05	33.94	36.23	55.73	82.8	39.44	36.89	30.49	62.27	23.34	54.77	21.86	53.97	27.65	21.4	34.36	73.44	65.81	29.38	49.97	50.63	73.07	84.71	40.1	55.27	47.41	60.74	57.44	21.46	52.9	33.82	64.52	72.91	61.74
ENSG00000104863	92.18	66.16	50.12	110.89	74.58	171.93	79.95	131.32	72.66	112.63	100.45	66.51	94.28	158.29	99.45	104.43	98.69	68.87	109.44	101.99	102.31	72.08	70.1	85.6	103.77	114.35	147.84	117.67	123.32	124.02	105.94	120.6	143.01	97.82	99.05	96.91	100.66	123.37	60.55	90.95	80.57	60.57	111.81	131.47	110.85	104.72	99.61	103	135.65
ENSG00000104866	56.73	53.76	62.58	51.66	74.13	61.49	51.83	57.03	60.93	109.44	89.45	84.33	64.17	90.96	102.2	63.72	86.72	57.19	76.48	67.08	73.41	69.2	52.57	76.13	70.15	77.46	85.62	76.62	78.04	65.13	81.6	93.35	60.75	86.81	66	76.91	80.47	48.69	43.96	72.49	55.46	79.23	52.48	39.94	64.65	57.44	65.94	96.17	43.09
ENSG00000104870	9.46	48.02	87.52	71.11	40.87	80.51	116.4	56.94	52.87	85.71	48.87	33.77	93.26	71.78	123.96	34.96	105.21	70.31	84.8	44.28	61.2	33.18	21.54	101.87	42.34	30.07	44.07	75.81	128.46	37.88	73.52	62.69	31.58	318.19	32.98	33.39	40.12	143.92	111.23	65	110.87	36.02	228.42	45.83	62.57	70.29	111.09	31.43	108.29
ENSG00000104883	1.11	7.46	4.65	3.83	14.03	16.35	7.79	13.65	8.98	13.72	12.94	7.21	11.88	15.59	12.61	8.32	4.74	9.68	9.54	9.7	8.12	4.36	4.15	10.79	3.29	7.55	2.46	16.22	6.28	7.29	5	9.75	2.27	3.95	4.35	14.61	9.77	12.93	7.63	10.94	8.75	4.39	7.42	4.62	7.74	9.1	2.12	8.19	9.97
ENSG00000104889	26.02	29.6	52.52	24.73	30.19	31.66	35.18	25.08	18.96	24.66	15.07	21.91	20.76	26.2	17.17	20.62	15.3	18.88	16.8	19.13	17.28	13.18	9.48	16.68	7.96	24.35	20.47	14.83	22.8	15.69	20.17	24.81	17.68	14.67	19.53	15	19.43	26.08	19.49	18.63	19.61	14.18	23.4	3.73	28.61	13.95	11.97	17.07	22.79
ENSG00000104897	145.75	85.05	219.68	159.59	80.59	135.67	100.7	93.28	69.99	72.08	110.2	51.38	68.53	81.4	68.1	62.59	60.57	67.41	45.17	77.7	47.75	35.21	41.12	105.42	32	91.22	58.55	87.21	56.15	43.11	47.93	93.12	94.26	74.21	54.7	54.33	84.55	162.22	60.74	68.5	74.53	77.23	100.74	39.66	78.58	50.52	83.26	71.08	85.57
ENSG00000104946	116.98	112.26	112.46	106.59	113.78	148.8	141.73	134.89	115.46	140.02	198.86	118.65	148.02	171.03	147.86	121.28	134.93	157.98	132.95	164.19	129.71	101.34	94.07	153.17	113.7	170.97	182.25	130.21	153.41	111.26	130.56	147.12	151.05	148.34	127.55	122.82	155.38	149.47	111.18	151.38	140.66	139.06	131.32	99.95	157.73	137.83	164.12	136.43	201.39
ENSG00000104957	58.35	43.36	103.15	112.65	35.51	72.23	70.95	76.41	53.9	56.82	83.33	52.03	52.61	40.8	51.68	50.88	43.62	57.92	58.67	74.76	49.95	39.47	28.62	68.86	31.79	63.81	41.24	70.88	52.56	34.39	40.56	79.72	80.32	45.3	56.55	49.95	73.24	100.71	60.99	52.01	75.15	65.86	76.82	41.46	59.18	52.15	58.02	51.35	95.19
ENSG00000104960	620.48	431.05	728.81	546.35	514.76	518.28	461.34	416.59	303.71	397.26	481.49	324.1	344.53	443.21	373.68	310.17	355.69	356.49	289.26	360.64	295.05	271.57	252.75	408.12	295.34	381.97	435.88	424.42	373.97	310.01	300.22	369.38	409.34	348.16	333.39	298.44	412.66	439.22	303.81	333.38	377.2	317.87	357.12	223.69	443.86	303.55	623.62	337.21	480.04
ENSG00000104964	199.04	230.43	345.91	181.06	199.72	460.49	114.34	427.08	361.46	633.85	525.09	311.54	269.09	634.1	871.61	343.03	392.37	500.73	487.55	346.16	199.06	174.29	99.88	407.22	125.16	528.04	332.4	637.33	270.14	180.52	372.18	551.44	125.69	262.15	198.66	501.14	513.76	426.9	105.73	344.35	254.24	370.13	283.21	418.75	136.08	251.65	274.68	357.8	213.47
ENSG00000104969	120.03	158.2	198.14	174.23	254.79	186.54	184.28	174.76	139.02	193.74	160.08	178.16	154.12	237.83	164.04	144.81	170.5	133.72	131.05	144.97	142.3	113.34	125.71	185.66	158.49	159.24	184.88	123.32	190	149.88	150.35	127.76	128.14	168.84	123.45	144.83	155.56	154.46	144.06	153.64	122.89	143.71	94.11	99.73	143.62	123.49	145.38	157.31	161.38
ENSG00000104976	36.16	26.51	37.43	76.4	45.06	50.8	32.07	46.02	37.45	67.14	55.55	54.46	34.33	72.74	53.53	42.52	52.51	28.57	41.99	38.54	43.22	42.1	33.45	34.41	38.82	52.48	51.45	49.98	42.54	36	33.88	53.64	45.31	41.71	32.74	40.29	46.56	46.7	24.8	52.25	37.22	39.91	38.99	26.71	29.81	33.54	41.34	47.83	46.82
ENSG00000104979	225.26	258.05	367.47	571.5	328.61	961.17	465.44	659.21	426.67	591.48	376.26	446.27	611.15	952.95	650.2	534.47	464.34	446.39	394.18	484.45	393.94	338.94	358.42	577.12	593.14	754.83	602.47	827.6	787.15	687.32	626.86	633.46	671.86	535.13	472.19	429.63	537	729.83	295.15	522.28	465.77	384.5	466.48	296.73	547.75	669.95	596.64	451.77	755.07
ENSG00000179943	13	9.09	22.32	7.84	15.19	19.11	10.24	16.25	14.13	17.62	25.55	12.15	12.53	25.94	25.72	10.42	15	15.32	13.94	24.67	15.82	14.06	9.09	15.32	10.95	21.59	15.15	15.79	24.47	10.06	10.96	21.91	19.14	15.4	9.37	12.29	23.46	17.09	9.29	22.2	11.36	16.81	11.5	6.75	17.9	11.08	10.66	18.28	25.89
ENSG00000105072	11.06	7.81	12.16	5.61	5.17	2.99	9.78	4.76	6.51	2.61	5.64	3.77	7.25	3.74	7.01	1.87	5.37	6.75	5.45	4.23	6.57	3.42	3.98	6.58	4.3	2.96	5.14	2.83	2.87	2.23	2.62	3.14	3.16	2.9	2.92	3.82	5.79	3.38	6.65	6.04	8.65	4.93	4.94	2.42	10.12	8.57	5.54	4.64	0.87
ENSG00000105171	20.71	21.12	36.37	42.8	30.17	60.89	43.5	67.27	36.33	62.16	48.8	57.06	53.12	66.16	63.88	63.16	54.5	36.23	57	53.12	68.74	63.22	49.19	52.17	63.65	79.55	59.17	86.42	57.6	68.54	71.21	59.96	74.48	38.11	57.11	66.17	55.61	65.74	41.07	57.23	44.71	57.75	60.58	30.37	54.37	56.82	45.64	44.85	50.95
ENSG00000105202	185.19	110.59	317.87	115.55	78.83	112.6	97.75	93.2	70.48	92.96	77.67	66.19	75.93	96.26	62.52	57.01	64.04	80.88	83.93	81.73	62.44	50.32	59.03	68.16	81.73	72.36	85.62	81.98	105.38	76.27	69.75	101.98	89.58	115.8	63.85	82.18	68.66	93.38	73.7	58.8	81.35	71.68	81.73	32.22	97.22	71.41	64.04	63.66	111.52
ENSG00000105254	571.15	518.13	468.97	703.9	767.97	832	584.2	570.87	394.57	587.12	454.53	466.94	469.88	806.95	447.96	470.64	430.99	391.67	425.69	398.49	415.72	335.71	314.19	433.85	501.52	556.27	565.92	485.68	561.6	534.64	515.8	480.37	476.94	471.62	420.01	468.78	468.33	595.21	313.66	502.99	361.38	362.64	510.55	315.14	445.72	413.86	426.95	447.22	575.46
ENSG00000105255	92.01	97.75	47.01	92.26	120.38	104.45	105.22	117.09	98.45	102.61	119.55	114.63	65.5	127.17	78.97	94.53	76.24	74.16	93.28	105	82.8	95.1	112.43	100.78	94.24	119.65	127.15	93.39	105.34	89.36	74.12	113.05	125.71	85.77	93.57	96.42	90.35	56.87	65.44	120.64	50.04	126.94	75.02	114.68	118.52	66.1	90.89	116.68	99.27
ENSG00000105258	27.78	62.12	39.55	80.95	43.93	139.78	76.29	87.4	78.32	107.82	63.5	55.37	66.55	104.81	96.9	55.96	81.94	55.8	64.98	61.07	52.48	24.06	43.81	62.15	43.18	61.61	62.9	101.74	107.06	63.03	51.64	67.71	46.45	37.98	26.23	45.91	63.78	95.79	32.97	64.2	50.42	55.47	55.72	53.26	45.82	66.45	63.77	52.44	134.05
ENSG00000105290	799.8	1187.86	508.93	881.18	1895.4	1549.41	1188.14	1290.63	1070.74	1599.33	1657.42	1712.93	962.33	1854.09	1072.98	1310.28	1501.74	1157.98	1218.13	1093.43	1405.46	1033.45	1050.52	888.13	1217.62	1610.44	1760.35	1155.66	1809.38	1155.79	1330.47	1153.98	1082.22	1538.81	1181.42	1428.8	1144.74	1082.25	777.78	1603.66	687.09	1042.61	837.63	802.81	1066.23	990.43	903.09	1471.58	1055.97
ENSG00000105298	31.88	25.93	47.5	53.46	32.95	49.24	35.17	34.69	31.41	33.95	42.23	31.61	33.82	42.88	37.43	32.01	37.74	32	27.37	41.19	32.71	24.44	25.41	35.65	31.59	33.59	31.99	38.18	32.5	26.56	31.13	41.47	38.5	31.59	28.04	30.56	37.69	38.23	29.81	28.68	37.71	33.99	28.71	18.73	33.04	37.42	39.27	34.58	35.6
ENSG00000105321	13.16	15	46.54	42.88	19.39	20.09	23.03	21.73	16.03	24.69	27.14	16.64	21.62	26.01	28.33	21.1	19.77	18.35	20.13	20.59	20.49	12.64	13.2	40.48	20.95	30.04	20.86	31.97	35.71	26.26	31	25.25	32.32	27.7	22.59	22.96	22.81	33.19	20.24	20.18	21.67	21.71	31.3	21.02	22.88	24.43	19.92	24.22	21.17
ENSG00000105329	5.97	10.97	83.52	19.97	12.35	28.21	20.9	12.79	18.54	27.74	18.18	4.67	29.6	16.93	38.07	9.57	23.62	25.98	8.65	7.44	10.19	8.35	3.71	9.65	9.25	12.3	13.81	11.6	22.27	9.32	18.21	18.4	13.33	80.64	6.19	11.2	10.48	27.61	31.19	16.31	15.65	10.11	45	14.17	8.9	10.47	14.08	9.42	17.84
ENSG00000105355	6.57	12.25	124.28	70.42	16.04	22.01	29.14	12.45	7.26	15.56	16.04	9.83	28.59	14.93	20.18	8.98	8.3	36.02	13.67	20.52	13.09	3.93	2.72	41.3	11.88	15.48	15.05	14.9	19.07	8.78	16.42	12.8	7.44	34.26	8.56	21.36	19.66	66.69	45.07	11.57	24.89	12.36	15.5	12.14	21.16	22.11	30.61	8.51	13.09
ENSG00000105372	1266.79	804.21	2302.48	1566.18	505.76	1034.16	676.48	512.88	344.82	565.55	403.86	320.68	620.26	600.88	671.64	425.77	383.71	461.48	471.66	335.9	381.95	204.03	210.8	658.54	291.79	594.24	407.11	589.56	757.4	385.8	426.99	581.86	582.51	462.76	321.06	440.27	428.44	768.51	530.07	362.66	584.99	323.65	612.82	206.84	556.85	674.54	913.39	269.3	997.13
ENSG00000105376	24.47	68.98	13.12	70.88	138.86	202.29	100.71	164.12	154.53	211.72	258.8	136.15	103.56	203.31	122.11	157.78	183.75	111.6	171.38	157.29	147.89	105.4	111.72	110.18	115.23	175.36	130.86	134.46	168.85	109.96	156.08	148.85	47.51	143.1	114	100.47	139.73	126.89	91.06	207.93	56.31	117.83	126.92	76.78	110.01	110.36	189.36	247.34	79.09
ENSG00000105401	194.72	152.43	231.04	244.35	115.51	203.49	221.08	167.37	155.16	190.35	203.47	166.64	171.01	191.33	141.58	169.69	161.74	143.09	190.14	222.71	192.22	157.92	173.05	277.72	185.3	245.54	257.94	230.37	218.68	244.65	212.22	366.46	320.93	196.21	240.48	220.84	290.85	338.78	149.5	193.79	151.68	180.13	233.1	112.55	224.74	150.34	221.5	237.93	244.08
ENSG00000105404	243.16	380.38	496.13	532.43	651.97	870.28	416.49	573.29	365.08	701.19	537.69	484.69	454.67	957.69	444.12	507.5	457.44	275.09	425.53	492.96	422.81	318.18	288.66	445.58	403.85	721.76	613.55	663.92	575.11	499.71	538.54	670.45	519.19	487.76	446.68	495.06	528.6	696.97	274.63	525.06	339.01	380.67	502.97	288.63	526.86	367.2	523.93	445.86	501.62
ENSG00000105514	12.24	15.05	27.77	7.59	36.02	11.69	9.42	17.52	14.44	22.64	10.28	20.73	13.07	20.01	13.01	13.74	14.77	11.54	17.18	14.23	26	18.57	24.33	12.85	36.8	10.38	18.91	10.7	22.45	13.37	28.2	4.95	16.63	24.36	18.44	16.8	6.45	6.1	11.89	14.04	11.76	16.58	10.39	5.08	21.99	18.03	4.66	19.52	3.66
ENSG00000105516	33.03	58.18	36.99	114.91	52.48	138.4	53.77	106.4	105.18	118.07	219.28	59.67	144.04	254.16	149.23	90.49	90.32	97.05	128.16	83.22	77.3	55.8	68.75	81.41	61.47	156.18	107.57	130.01	159.69	116.84	106.29	130.85	94.81	103.33	97.7	106.48	115.03	98.04	91.56	94.74	117.64	138.89	69.61	133.8	110.57	113.54	91.25	110.47	107.32
ENSG00000187266	2.12	3.56	6.97	4.39	4.46	4.68	8.17	5.79	5.93	7.74	17.83	6.35	6.61	5.58	14.29	5.67	9.04	7.7	4.97	9.77	5.64	5.72	4.62	21.44	5.75	8.1	3.91	6.19	3	4.06	3.58	8.59	5.77	9.05	5.92	4.43	13.04	8.81	13.34	8.12	6.49	7.19	10.3	0	9.84	12.16	21.57	3.91	3.17
ENSG00000105538	4.51	10.35	15.37	9.64	14.77	20.57	17.7	16	12.9	12.15	27.13	9.22	14.46	16.08	16.64	13.27	14.75	9.5	12.67	17.72	19.18	6.19	10.66	15.32	8.68	17.99	12.63	24.13	17.52	10.6	16.24	20.39	12.27	15.09	12.35	12.4	12.95	41.6	7.22	14.55	18.54	10.7	35.87	11.25	11.78	11.08	9.75	14.13	14.84
ENSG00000105583	276.76	180.08	259.93	324.11	166.94	282.96	206.1	183.53	145.37	214.43	198.31	162.99	205.99	265.95	212.17	195	200.13	144.19	184.44	212.1	183.74	121.95	109.42	225.66	177.36	211.24	246.27	290.97	280.56	222.66	238.99	259.56	299.13	239.69	193.77	211.76	214.99	313.33	150.98	195.19	204.5	200.22	239.56	114.98	221.67	214.14	204.52	154.39	372.09
ENSG00000105607	14.24	22.75	33.61	21.49	38.34	39.88	42.73	41.14	25.7	33.84	40.31	26.02	37.41	40.39	35.56	35.52	29.86	46.73	31.73	42.38	18.01	19.92	16.01	52.05	35.77	31.63	33.44	46.13	37.33	29.64	27.06	33.38	27.18	33.27	29.14	19.43	47.63	61.93	34.1	30.38	47.41	28.7	32.9	33.81	45.2	43.29	28.85	36.2	47.61
ENSG00000105612	3.52	10.82	29.95	35.15	30.83	29.1	25.87	22.79	15.85	29.6	26.15	18.41	30.53	46.76	23.07	22.57	31.87	39.57	30.19	33.25	18.11	21.54	18.04	35.54	40.33	28.35	29.14	34.2	37.26	27.39	28.68	38.56	34.07	61.3	27.5	29.93	37.59	44.56	45.75	23.55	46.9	15.39	36.28	32.9	29.58	35.28	26.82	22.13	27.6
ENSG00000105617	19.3	14.77	22.45	30.09	25.16	38.08	30.58	32.55	20.2	32.47	39.38	38.47	20.79	40.34	29.52	39.64	38.96	24.32	26.94	31.5	29	21.39	19.57	22.98	35.56	43.08	42.62	41.47	36.57	38.85	21.13	26.71	32.44	36.84	29.48	34.57	39.84	39.64	22.64	37.19	39.95	33.25	32.04	16.88	37.69	34.09	28.39	28.05	37.94
ENSG00000105640	250.96	147.13	526.8	297.56	189.05	209.07	138.43	128.58	75.6	139.86	83.53	81.1	120.46	173.21	146.59	92.68	112.34	95.99	105.57	64.85	89.87	137.77	51.03	133.96	66.73	163.82	78.36	133.03	171.75	100.54	106	157.93	122.96	135.17	77.24	105.32	98.81	234.88	108.66	88.91	140.91	81.55	148.51	69.51	103.15	103.31	122.67	67.2	177.22
ENSG00000105642	45.79	85.13	41.2	68.01	181.74	126.34	80.36	142.72	167.75	320.46	159.07	129.81	168.83	256.67	335.48	141.46	189.65	232.54	133.11	115.25	169.39	125.21	122.31	138.88	153.92	176.03	198.27	83.23	216.16	109.16	168.47	172.03	155.56	197.04	101.89	132.06	133.66	92.33	116.58	162.78	201.67	135.27	72.86	71.65	139.27	219.02	87.25	153.64	262.08
ENSG00000105643	3.96	9.96	11.82	19.09	8.02	13.1	14.78	8.1	16.4	28.86	67.78	25.32	28.77	25.05	44.42	20.81	22.49	35.9	27.79	17.58	20.59	17.45	19.27	23.46	19.52	28.54	20.4	24.37	49.36	21.63	29.3	36.93	25.55	36.12	20.62	38.6	21.63	31.23	29.79	27.76	12.11	17.13	28.01	10.97	21.42	19.98	19.28	35.63	24.64
ENSG00000105647	283.65	274.83	196.8	125.29	511.54	171.25	153.72	149.38	210.93	251.8	141.29	128.4	136.42	193.72	251.03	123.83	177.15	217.39	122.25	115.6	130.81	118.31	115.16	106.72	147.51	97.69	156.8	93.01	213.02	97.7	118.78	83.22	91.2	179.8	79.75	90.47	83.64	71.19	119.29	118.53	199.46	120.49	75.9	79.16	138.06	223.27	141.08	128.08	174.02
ENSG00000105649	1090.26	1486.93	488.12	1408.93	2694.04	2268.09	1512.99	2354.34	2090.31	2303.18	2171.4	1988.03	1601.12	3310.17	1931.08	2291.25	2272.76	1696.67	1777.41	1499.03	2093.02	2000.39	1949.63	1341.59	2384.02	2311.01	3839.71	1890.6	2455.39	2204.69	1919.8	1755.23	2142.6	2443.13	1864.07	1657.17	1821.59	1531.2	1109.72	2417.16	1313.77	1983.47	1524.83	1619.47	1888.78	1396.69	1493.84	2172.24	1592.25
ENSG00000205155	65.98	134.3	255.33	230.91	170.19	413.24	240.22	246.51	127.9	263.42	196.1	227.54	234.87	356.06	211.35	239.82	234.31	122.54	187.3	186.69	185.74	120.18	137.75	221.79	178.25	232.79	172.88	294.97	322.26	223.49	256.64	226.01	193.65	198.9	194.43	231.6	199.27	381.28	177.99	198.99	163.78	153.43	211.29	142.55	235.6	179.28	204.49	160.34	307.53
ENSG00000105663	41.6	28.42	58.54	33.16	25.4	29.97	37.55	31.9	28.23	26.18	29.56	25.9	23.73	17.02	22.13	20.02	21.15	20.62	23.79	28.6	22.8	21.69	20.56	30.34	16.52	22.08	17.56	16.84	22.77	13.6	19.82	25.88	25.23	20.36	24.43	18.89	27.32	31.01	28.4	26.87	28.47	25.35	33.47	9.91	23.99	23.18	24.84	26.93	25.57
ENSG00000105677	53.49	59.81	139.47	90.88	57.48	176.92	84.88	86.3	52.06	98.97	105.97	68.41	85.67	129.11	104.86	81	78.51	51.73	82.03	92.42	61.55	38.41	44.31	96.52	72.95	101.3	104.97	102.23	111.99	61.36	90.19	94.97	106.59	96.33	57.71	106.42	91.82	115.46	55.02	78.9	87.26	80.5	88.66	74.07	108.51	67.12	73.6	78.77	138.49
ENSG00000105679	4.61	11.78	8.25	10.88	3.69	11.13	17.51	16.6	9	8.49	11.91	10.17	12.3	2.69	10.26	9.15	10.75	7.64	10.78	18.5	10.49	4.19	7.77	10.64	3.89	10.05	2.91	9.6	3.72	3.96	7.03	11.1	10.29	4.21	2.94	5.11	11.17	16.94	10.91	6.83	11.51	9.29	11.98	5.47	11.83	10.23	8.36	12.93	13.77
ENSG00000105697	6.33	0	115.37	24	1.48	2.33	4.43	2.16	15.74	23.09	10.23	4.73	219.84	7.4	22.44	8.46	35.99	16.08	17.29	26.09	18.92	10.85	11.81	107.48	23.42	139.67	18.65	33.86	127.41	12.11	23.14	104.64	8.61	31.52	14.14	15.12	20.39	602.17	369.26	20.76	19.38	5.36	48.02	171.06	168.9	7.78	140.8	7.77	33.12
ENSG00000105698	322	292.95	490.97	383.63	347.78	584.93	519.26	536.2	322.21	514.27	447.62	382.73	517.9	613.47	726.64	369.61	477.06	493.02	376.67	413.66	391.63	315.95	302.55	606.73	427.41	398.43	585.64	546.34	575.59	383.53	395.34	460.03	583.65	512.27	367.5	442.71	491.22	544.53	284.33	421.77	568.61	405.17	442.59	334.44	501.03	609.12	497.82	453.48	762.92
ENSG00000105722	57.65	62.25	126.73	132.16	107.06	108.5	116.92	106.05	102.82	127.36	117.85	109.22	93.76	148.32	67.98	95.63	114.72	58.05	90.7	67.9	87.77	55.48	56.82	77.91	64.19	110.01	72.42	62.31	114.35	60	99.73	59.65	48.28	74.2	63.79	60.23	75.63	91.19	79.82	117.57	56.03	84.15	106.7	53.69	66.55	74.03	53.97	104.61	54.94
ENSG00000105723	274.22	308.84	241.15	223.39	504.22	305.01	251.18	365.54	338.66	377.69	386.68	336.77	269.77	537.28	438.32	372.22	436.91	348.22	322.29	286.46	379.62	312.91	340.05	311.91	388.54	360.86	548.12	307.58	455.77	373.75	338.89	364.16	360.5	407.31	292.1	308.12	299.82	251.68	270.2	378.94	261.54	310.79	246.93	316.58	372.38	327.75	256.1	326.64	300.79
ENSG00000105732	47.07	22.82	31.31	46.38	38.28	28.91	24.61	25.39	19.8	25.22	20.98	20.78	29.43	34.1	22.8	21.34	22.85	25.29	18.59	23.09	18.99	18.82	17.21	26.96	21.74	25.01	41.66	22.58	29.44	21.65	20.26	26.11	29.55	31.13	21.28	21.52	28.77	27.95	24.86	25.88	22.91	23.88	21.32	21.04	27.97	24.14	21.38	25.23	20.03
ENSG00000105738	21.6	18.08	24.09	16.55	20.19	14.77	11.95	11.95	13.14	17.03	12.3	10.92	14.65	14.03	17.56	9.45	13.73	14.69	7.07	11.78	10.53	10.58	10.23	14.04	11.39	9.61	12.79	5.43	11.3	5.78	12.06	7.54	8.01	15.25	7.67	10.28	10.26	9.28	11.05	11.06	16.77	12.02	9.35	10.04	11.21	14.34	12.76	13.07	8.58
ENSG00000105767	383.14	394.32	623.46	458.66	491.98	396.02	298.59	308.2	258.23	505.31	274.9	395.1	368.12	436	379.69	247.43	314.08	315.8	173.59	287.74	209.25	214.59	171.95	318.33	247.62	341.63	338.51	268.97	243.29	263.65	211.47	198.56	279.03	221.97	238	382.74	271.51	385.15	296.08	262.59	425.24	354.65	198.31	212.78	247.2	241.81	155.12	253.84	325.16
ENSG00000033050	39.69	39.84	58.54	48.09	65.69	48.15	40.84	49.88	49.61	53.89	51.28	58.38	51.91	72.05	50.83	55.97	65.2	46.48	58.92	71.58	58.1	64.62	63.87	59.12	84.62	62.05	115.78	50.19	73.23	81.76	75.25	67.06	88.04	77.51	75.79	77.07	68.85	68.28	55.2	62.44	53.49	76.37	48.72	51.65	72.9	49.31	49.8	60.74	46.43
ENSG00000105793	6.94	3.88	1.66	10.52	0.65	7.65	6.8	6.62	2.16	2.33	6.28	3.46	3.7	2.84	3.44	4.82	1.48	5.03	5.95	8.07	4.61	6.11	4.74	8.41	3.08	7.65	2.55	4.05	1.47	4.55	3.9	6.55	11.78	1.48	7.36	8.28	6.9	2.88	8.33	3.41	3.03	10.18	8	8.65	4.42	6.81	6.17	7.24	7.26
ENSG00000105835	24.58	11.4	81.64	37.17	5.32	14.1	20.57	19.21	14.9	6.72	13.17	9.26	20.28	2.8	7.22	17.31	4.26	13.05	11.69	9.59	8.76	11.74	12.67	27.13	6.5	10.68	2.21	5.83	11.85	10.15	15.16	14.96	8.96	5.97	9.03	8.23	8.77	100.06	25.01	8.84	12.58	8.8	17.82	12.45	15.64	8.34	20.18	10.67	14.33
ENSG00000105849	6.35	3.55	2.85	11.49	2.6	3.5	5	2.71	8.39	0.45	3.08	6.33	4.24	0.93	1.13	6.37	1.13	8.64	6.81	6.16	5.27	7.39	7.89	7.7	4.31	3.37	2.34	7.72	4.48	7.38	5.8	6.96	4.86	3.95	5.76	6.16	2.79	3.3	2.72	4.77	4.86	6.27	9.63	13.2	6.44	5.85	4.03	6.82	2.37
ENSG00000105855	2.8	3.13	2.71	7.47	3.59	3.6	3.43	4.29	3.04	2.55	3.61	4.18	4.67	1.63	3.22	1.87	2.73	7.61	4.64	9.32	3.02	4.96	3.69	4.8	4.31	1.19	1.03	2.72	3.7	2.67	1.97	0.71	0.24	2.49	2.15	3.97	3.48	0.87	7.59	1.91	1.53	1.58	2.76	8.72	2.63	3.43	5.33	3.22	2.09
ENSG00000105866	14.06	9.97	6.35	3.54	3.85	7.06	8.16	5.14	7.88	1.35	3.55	2.73	3.97	1.2	2.67	4.03	3.9	8.71	3.74	4.49	2.5	5.21	4.69	3.33	3.72	2.33	1.01	2.67	1.69	1.87	2.31	1.62	1.4	0.49	4.78	2.46	2.61	3.13	6.08	2.25	6.29	6.77	4.58	12.82	1.99	3.65	3.27	4.84	1.02
ENSG00000105880	28.78	20.76	237.82	33.25	16.92	11.6	22.1	15.19	16.73	10.93	14.39	10.64	12.39	16.81	18.42	6.95	9.23	19.53	13.76	6.75	9.86	9.54	7.5	6.75	8.24	6.3	17.08	22.55	8.52	10.65	16.17	5.63	10.72	9.9	5.7	6.1	7.61	6.17	13.79	9.13	29.21	11.53	12.39	15.43	6.46	23.55	17.69	5.7	16.64
ENSG00000105926	15.92	13.91	2.97	6.51	7.91	4.02	9.06	4.07	10.2	3.91	6.43	5.95	6.2	3.2	4.58	5.85	4.95	11.19	9.31	3.38	5.62	8.77	8.35	4.42	4.42	4.22	3.66	3.39	1.76	8.43	4.75	4.7	3.72	6.37	4.17	2.97	4.08	2.89	11.09	3.26	5.65	2.25	8.45	10.34	8.08	13.85	7.9	6.72	1.49
ENSG00000105971	14.29	57.28	34.14	41.03	17.81	40.28	51.71	17.87	20.72	9.35	20.01	13.06	38.16	13.91	18.57	21.65	43.99	13.83	57.6	27.7	36.38	27.99	16.28	26.95	9.4	16.16	3.51	34.73	16.81	16.92	25.44	36.95	6.47	25.41	18.61	14.22	11.15	35.6	31.32	27.33	31.23	20.17	69.35	49.49	30.38	19.5	25.72	11.7	46.27
ENSG00000106025	4.13	11.55	8.63	17.07	2.9	12.15	24.58	13.38	8.34	3.47	8.01	2.57	16.54	3.02	7.32	5.52	8.07	6.74	4.03	7.01	7.54	3.54	3.85	7.51	4.58	5.26	0.76	13.05	2.19	4.51	1.74	1.39	5.61	2.2	4.61	3.08	5.44	1.71	7.67	2.26	7.22	1.17	13.15	21.45	5.99	5.07	6.56	5.7	10.8
ENSG00000106077	8.52	18.1	14.75	31.1	17.91	46.97	33.4	50.53	28.58	28.18	44.03	23.77	29.57	33.83	35.62	29.14	21.78	22.87	36.54	22.29	22.06	26.7	20.64	31.67	18.48	26.73	26.33	39.74	15.63	16.29	16.76	45.38	49.78	11.51	29.48	24.41	47.87	40.32	22.4	36.3	30.53	26.93	29.97	21.24	27.16	29.98	24.89	28.75	43.27
ENSG00000106080	3.81	2.84	6.82	12.25	0.59	4.67	8	6.06	8.68	1.42	4.1	4.43	4.52	1.48	3.6	1.36	4.51	4.61	9.9	4.31	2.53	4.97	8.68	6.16	3.13	4.31	0.93	11.11	1.79	6.24	3.57	3.42	1.73	3.61	5.67	4.55	2.23	6.33	9.43	1.39	3.33	2.87	9.24	5.28	8.83	9.35	10.48	3.9	3.79
ENSG00000106089	125.76	139.59	20.03	100.11	161.92	194.46	168.92	251.48	216.45	258.55	282.87	255.77	174.08	318.79	197.38	247.96	211.05	125.69	187.42	137.2	228.21	239.9	208.93	118.93	185.06	204.61	183.73	203.69	197.89	163.86	165.45	152.63	147.46	143.05	149.2	150.13	181.55	78.11	125.64	293.65	96.88	219.76	152.54	104.49	169.54	180.68	140.21	296.67	208.73
ENSG00000106100	3.95	4.42	7.41	3.89	0.66	2.9	2.96	2.31	2.81	3.01	4.92	1.97	3.77	2.14	5.2	1.36	3.41	2.87	5.28	3.28	3.56	1.66	2.1	4.79	1.25	1.68	1.45	1.37	3.78	1.08	1.9	2.66	0.77	5.62	1.26	1.35	1.98	3.05	8.71	0.93	2.47	1.11	8.39	0	2.62	1.62	6.09	2.6	2.11
ENSG00000106266	13.29	11.95	16.9	11.14	23.49	22.51	26.7	35.05	40.2	37.58	38.44	35.41	31.87	67.81	54.86	33.97	33.23	33.11	32.89	29.11	41.42	27.44	30.87	27.07	33.61	24.99	39.12	28.63	53.82	35.03	35.72	35.84	32.97	47.23	21.92	33.45	37.53	31.66	30.71	47.03	47.46	37.82	25.23	38.4	23.78	40.66	25.68	30.13	60.41
ENSG00000106299	36.18	30.34	21.6	24.19	15.91	21.9	32.41	27.2	68.42	38.48	44.69	46.4	36.93	27.65	30.54	55.74	60.84	65.61	53.94	63.92	44.86	92.74	85.28	32.67	60.32	47.38	31.72	32.06	22.91	60.16	50.84	45.2	41.21	27.61	54.34	65.74	52	34.45	64.77	44.18	43.24	57.65	39.04	114.94	52.43	43.11	27.37	62.36	34.97
ENSG00000106305	25.76	29.83	30.76	67.17	48.14	39.22	28.34	28.85	25.15	31.98	22.58	33	32.74	39.75	28.68	32.45	32.67	38.7	31.56	22.28	28.09	17.11	22.86	26.76	35.37	42.13	31.14	25.03	35.06	37.19	29.99	22.33	35	35.31	30.8	30.75	31.23	68.73	30.49	37.19	38.59	36.34	17.85	30.57	24.53	22.58	22.2	33.87	35.73
ENSG00000106330	65.17	80.74	80.89	85.39	74.64	95.81	70.68	58.37	48.43	53.74	44.58	30.57	50.04	65.67	59.77	31.42	54.46	49.13	35.88	32.81	35.63	18.77	23.82	37.17	27.72	36.85	40.44	53.4	42.39	32.11	40.94	37.91	46.01	39.98	27.81	38.9	37.4	89.12	40.17	47.47	53.61	36.78	32.55	26.55	41.48	57.52	28.4	34.5	57.27
ENSG00000106333	19.74	31.11	31.08	30.91	14.54	21.11	131.52	18.76	6.69	14.09	12.37	6.56	12.24	3.84	8.48	14.07	17	8.25	53.65	13.62	15.09	8.79	8.18	10.15	5.6	7.1	6.16	12.79	52.78	4.9	41.02	22.19	16.26	243.29	10.02	4.64	4.9	21.85	12.99	4.9	20.39	4.73	126.99	4.97	7.63	10.77	10.26	6.24	25.02
ENSG00000106344	20.19	16.84	28.35	18.79	9.27	15.62	29.26	14.73	16.07	9.93	16.94	10.94	22.38	6.41	14.06	14.39	11.07	14.13	17.68	19.22	14.58	13.87	12.98	20.89	12.05	12.32	8.6	15.84	4.25	10.45	14.53	15.76	14.92	6.55	13.24	14.8	12.02	17.06	22.47	10.45	17.65	16.59	16.76	26.49	15.4	14.78	29.69	11.74	12.17
ENSG00000106392	22.93	26.88	8.39	21.91	13.13	26.1	26.41	40.34	17	7.88	19.11	27.27	26.33	8.64	14.68	31.63	15.23	12.88	28.26	27.23	27.99	21.73	24.81	23.31	17.87	17.56	5.99	29.47	6.26	23.43	15.38	20.45	17.08	7.36	25.18	18.98	16.45	17.81	26.63	23.84	16.81	15.03	22.88	24.58	22.72	16.95	23.01	18.61	23.2
ENSG00000106397	32.94	17.96	83.78	35.58	16.72	37.66	37.3	21.62	21.22	32.15	30.74	42.76	39.08	19.71	27.09	17.17	16.46	23.01	25.05	34.48	21.6	17.32	15.41	31.54	20.85	19.66	19.45	25.29	18.66	13.77	17.14	26.32	30.67	39.32	20.43	33.98	34.51	45.24	29.28	22	33.76	27.77	34.53	15.21	31.35	23.63	73.6	26.7	35.84
ENSG00000106399	11.03	8.64	17.13	16.72	4.12	27.57	20.08	25.57	15.08	13.61	15.68	17.59	11.78	16.75	23.46	27.13	28.21	14.41	27.53	17.11	19.05	24.85	12.34	17.83	20.67	56.14	30.86	27.88	38.93	37.37	34.73	32.73	38.98	4.71	14.78	47.42	18.08	25.65	26.48	24.11	19.29	23.66	38.81	18.34	23.02	36.12	9.81	16.25	19.78
ENSG00000106415	24.13	13.49	16.93	12.47	5.64	11.97	24.92	14.8	17.99	8.46	10.52	13.83	9.12	4.23	8.55	10.96	9.42	15.31	11.76	13.15	11.21	16.83	12.37	3.41	8.03	9.72	4	12.9	5.11	10.54	7.8	12.61	12.7	6.43	11.44	17.64	14.12	5.51	15.86	7.25	10.02	41.53	10.97	7.52	10.49	14.32	13.02	17.77	6.31
ENSG00000106477	5.76	12.48	8.6	6.45	12.78	4.76	6.05	11.29	12.52	7.26	8.84	13.63	5.77	7.15	9.18	10.77	16.87	11.49	10.1	10.81	8.6	11.63	14.76	11.05	16.32	10.99	8.48	8.39	8.64	16.12	15.37	7.28	8.31	9.21	12.45	9.02	8.85	4.78	8.64	11.8	11.32	13	8.73	5.98	8.34	12.96	8.23	9.72	7.53
ENSG00000106479	24.16	21.49	21.16	13.47	15.16	15.56	21.43	16.31	15.87	15.87	16.8	20.3	13.51	9.81	15	12.54	15.36	15.69	18.84	21.74	14.97	16.67	16.73	16.73	11.8	11.12	10.5	14.76	8.44	8.67	12.8	18.93	14.54	11.45	15.92	14.56	17.91	10.89	19.33	14.71	18.1	16.36	15.35	15.29	15.6	18.08	20.9	16.8	8.94
ENSG00000106484	21.63	38.08	69.86	56.3	38.94	37.69	44.32	25.67	22.4	21.56	17.08	23.16	19.96	21.52	14.76	19.27	23.9	15.11	15	18.63	22.87	25.5	22.9	21.36	25.28	16.31	17.1	17.13	14.7	25.82	21.17	10.8	10.89	17.09	15.2	11.96	16.41	13.97	17.86	25.39	9.1	14.02	15.06	29.96	19.97	19.02	26.97	18.19	7.18
ENSG00000241127	51	31.83	12.04	44.93	13.3	33.13	46.5	34.77	22.1	11.3	28.35	26.59	25.33	18.7	16.81	27.26	12.63	22.37	24.05	29.3	21.26	24.39	16.21	23.96	18.71	19.11	13.96	35.73	16.74	34.99	22	28.79	49.15	8.43	29.78	31.86	27.07	31.51	25.76	23.33	27.99	26.77	18.7	29.56	32.31	30.09	21.84	17.47	30.12
ENSG00000106591	82.62	67.7	55.29	173.68	8.65	162.29	110.7	139.83	53.98	51.91	80.98	75.95	93.8	58.23	57.54	104.3	57.66	49.6	102.2	84.88	91.73	64.16	69.91	102.43	65.3	90.6	58.7	124.59	75.4	84.82	76.86	114.29	105.48	29.37	92.21	95.23	90.87	96.97	62.68	88.71	58.51	77.18	114.03	65.09	124.67	92.09	98.6	71.67	78.73
ENSG00000106624	12.53	20.88	59.41	59.73	22.62	18.41	81.96	20.85	10.77	10.8	10.12	7.44	20.15	6.47	17.41	7.34	22.58	13.45	56.92	35.59	26.71	8.37	3.44	17.32	8.31	10.83	9.75	20.37	100.98	5.79	47.52	12.99	5.4	233.58	12.9	2.88	25.52	58.59	48.04	6.32	33.68	13.46	103.86	15.01	9.49	24.05	50.02	5.91	34.18
ENSG00000106635	23.87	17.06	30.89	38.37	13.01	38.02	27.85	49.73	34.6	36.44	47.98	49.56	43.67	66.61	57.33	53.87	49.92	45.22	47.57	59.11	56.35	50	47.79	36.43	60.8	71.98	85.89	70.88	71.13	65.93	56.65	58.12	78.38	63.17	62.17	74.41	57.44	70.47	35.62	48.54	37.09	63.62	37	77.13	64.57	51.01	37.06	54.52	49.53
ENSG00000106636	39.23	53.71	54.13	74.55	55	51.71	23.68	51.65	48.75	72.06	49.82	51.91	65.01	52.93	54.64	45.55	49.96	35.33	35.87	36.05	38.62	32.46	37.82	32.79	60.69	48.19	50.78	43.39	45.83	34	41.82	27.36	32.17	39.43	40.01	39.57	33.25	33.7	34.79	36.95	43.75	32.83	35.28	39.34	47.83	42.07	29.21	44.83	34.36
ENSG00000229809	43.74	19.56	46.43	30.8	19.53	60.01	32.66	43.07	27.78	37.6	66.56	36.81	42.38	61.3	51.65	24.42	36.58	35.25	32.59	41.91	37.42	14.75	16.91	32.2	22.04	44.51	33.62	53.84	40.47	30.26	34.41	65.53	40.94	32.48	34.17	30.17	44.37	54.87	23.33	32.39	37.37	26.88	33.01	20.19	41.69	31.02	40.74	32.2	52.27
ENSG00000086065	61.19	55.42	40.92	70.81	12.58	70.16	53.97	53.39	45.62	39.8	34	57.93	40.29	28.59	34.69	54.94	44.32	23.08	66.8	49.21	47.93	50.33	49.42	51.42	34.99	51.89	21.61	66.6	31.09	57.49	44.02	52.81	63.18	18.27	51.22	61.36	45.12	56.89	48.95	54.15	58.82	38.68	43.04	15.25	51.78	62.09	45.85	47.31	58.5
ENSG00000106692	3.5	3.91	0.35	4.01	2.18	1.28	4.9	2.78	7.24	0.65	2.64	4.65	1.56	1.36	3.3	2.18	2.9	3.8	4.54	4.23	3.87	4.56	5.07	0.94	1.72	1.98	2.57	3.96	0	1.59	3.28	2.75	1.58	1.66	2.28	3.48	3.07	0.97	4	0.96	4.58	3.95	2.47	0	3.38	2.38	1.48	2.5	3.48
ENSG00000106771	9.18	14.57	9.2	7.55	9.83	8.27	9.95	8.08	14.54	8.3	10.33	9.59	10.81	6.92	9.86	10.76	13.04	13.54	8.78	20.52	10.22	19.14	25.76	9.57	11.83	8.54	11.99	7.48	6.06	11.97	13.15	11.18	4.43	10.95	8.93	12.2	10.23	4.92	16.76	9.06	6.99	16.38	8.62	22.15	11.85	12.12	7.15	11.99	6.19
ENSG00000106803	113.79	60.52	134.25	175.89	32.42	169.33	120.47	102.17	63.8	73.14	46.62	70.53	61.75	102.11	110.14	86.04	63.08	44.29	80.08	60.51	82.92	46.2	50.01	96.43	79.35	96.5	69.45	115.98	90.1	100.07	76.44	91.7	90.5	76.95	55.76	53.01	71.47	156.69	65.03	71.27	65.49	61.09	134.66	46.12	77.22	77.23	79.31	81.75	111.94
ENSG00000106804	0.67	0.93	0.5	1.26	0.08	0.86	1.52	0.91	1.24	0.19	0.65	0.66	0.89	0.29	0.35	0.71	0.12	0.73	1.95	1.53	0.55	0.73	0.41	1.35	0.41	0.42	0	1.94	0	0.36	0.37	0.34	0.45	0.24	0.93	1.09	1.07	1.52	0.67	0.55	1.17	0.19	1.01	0	1.45	0.95	0.64	0.72	1.49
ENSG00000106992	117.38	131.27	113.53	195.12	210.45	272.92	190.27	175.7	133.17	227.5	195.36	139.88	155.55	245.14	141.95	168.45	142.27	156.42	133.33	155.15	127.06	103.07	96.71	188.66	151.58	204.51	200.94	214.51	218.82	173.55	160.63	188.4	259.17	176.88	182.99	160.7	191.17	239.4	87.5	155.44	188.45	147.62	165.59	90.11	168.62	173.33	178.26	147.97	297.33
ENSG00000107020	20.01	7.12	14.12	15.04	6.8	40.11	26.74	17.36	9.04	12.24	12.93	11.78	11.33	10.62	10.31	9.72	14.21	6.6	12.77	12.34	13.28	10.69	6.78	13.23	6.28	21.6	4.02	17.68	7.7	17.89	9.2	12.26	17.3	19.4	10.15	8.69	9.58	19.63	7.28	11.93	20.67	7.19	16.55	15.11	13.71	16.38	9.24	11.16	24.46
ENSG00000107223	330.5	285.15	354.21	607.62	356.93	732.02	553.19	540.15	330.43	429.53	446.85	468.99	407.08	651.89	476.17	462.1	348.2	392.18	447.2	373.26	449.01	322.56	315.49	435.06	413.24	551.29	513.84	587.07	549.92	518.92	447.78	547.51	642.36	417.03	400.64	381.5	470.13	565.14	321.47	472.33	407.45	313.76	457.95	300.07	518.88	440.64	435.06	420.38	686.61
ENSG00000107290	10.09	9.44	4.49	9.93	10.92	5.45	9.87	7.02	12.85	4.39	7.32	10.26	8.06	4.09	5.33	8.2	5.04	10.45	9.79	10.97	8.41	14.31	11.96	7.98	6.95	5.06	3.33	7.9	3.85	8.38	6.6	7.5	6.22	5.34	7.24	9.89	7.41	6.24	9.82	7.48	9.99	11.85	10.8	16.25	8.47	9.27	7.65	7.58	5.69
ENSG00000026025	88.98	202.83	2929.76	562.01	208.2	379.84	901.37	129.72	109.28	138.16	114.53	95.84	327.68	194.66	162	152.19	316.94	185.2	596.21	191.66	357.61	91.15	62.94	455.7	89.07	97.52	122.91	206.86	681.1	138.34	762.07	400.11	59.52	1992.64	140.18	113.17	247.96	920.56	695.09	102.46	408.56	70.69	1526.29	179.14	130.52	165.8	797.17	102.9	397.73
ENSG00000095585	0	1.65	0.35	2.43	0.28	3.9	5.36	3.61	5.86	3.96	2.28	1.76	4.72	2.06	5.84	1.26	3.35	4.27	6.43	1.14	4.69	3.75	2.56	1.43	2.61	1.5	0.43	5.15	2.91	2.25	1.66	3.97	2.4	3.77	4.6	3.16	3.45	0.49	9.09	2.9	3.6	2.99	13.93	2.45	6.49	6.27	12.72	3.98	3.52
ENSG00000095596	37.3	53.8	1.29	144.12	45.72	26.62	6.81	12.53	9.4	43.65	23.05	16.43	15.39	7.58	6.9	6.93	2.3	8.24	2.95	7.6	4.67	10.59	7.39	0.44	5.6	8.25	2.39	6.83	0.76	3.25	2.43	2.19	3.67	1.15	4.53	8.39	2.85	0.45	5.25	6.2	6.14	6.71	8.2	0	14.41	1.77	1.72	6.97	12.11
ENSG00000107623	17.34	54.93	7.77	41.8	80.34	46.2	23.27	25.61	13.46	10.13	25.2	3.24	18.64	10.13	15.36	8.11	18.47	10.48	9.58	13.3	8.15	3.54	9.43	11.67	8.55	3.68	9.57	11.23	8.16	6.71	8.12	12.18	4.91	13.35	10.08	7.76	19.87	19.79	12.8	6.71	14.52	8.15	11.83	3	13.4	5.91	14.22	10.64	8.63
ENSG00000107796	4.99	35.04	89.31	21.59	20.63	50.78	266.27	73.8	35.84	24.76	23.01	64.59	30.42	46.17	39.87	109.25	147.7	24.28	398.23	93.85	506.41	46.38	51.33	58.12	27.03	49.53	42.98	52.6	736.88	45.91	390.69	655.01	17.9	2650.71	53.26	22.96	45.02	226.47	56.58	60.31	130.71	27.33	1452.15	23.67	28.48	15.15	55.18	45.89	271.3
ENSG00000107819	70.31	68	46.53	43.2	71.04	48.19	39.91	52.47	61.98	79.91	55.25	66.76	45.66	48.83	49.15	68.56	49.26	51.01	60.76	85.16	58.04	69.32	63.76	63.72	67.45	62.05	62.93	62.79	63.04	69.04	60.35	82.64	76.17	76.33	67.87	66.93	68.96	46.54	80.37	58.66	62.28	75.08	51.29	59.21	80.96	41.21	57.93	72.88	34.07
ENSG00000107872	59.93	82.52	99.88	72.7	89.85	172.9	69.51	121.34	106.69	202.1	190.11	107.86	111.43	269	237.05	118.08	154.36	81.75	161.82	133.46	112.23	56.49	50.01	118.52	56.44	256.38	126.38	250.33	120.57	103.09	136.23	250.27	109.37	115.09	105.32	156.43	191.06	156.68	65.94	162.23	99.27	141.34	110.11	78.03	83.47	106.87	118.14	145.44	165.67
ENSG00000107960	8.03	9.79	11.76	10.05	7.5	14.48	19.41	18.4	18.13	27.41	14.14	21.81	14.28	19.6	24.3	29.25	23.84	19.05	18.21	24.04	23.25	23.22	24.02	25.35	30.57	28.46	31.68	21.98	22.66	27.9	30.34	33.45	36.18	21.79	27.69	30.92	23.48	37.55	25.43	19.13	22.32	20.59	27.43	18.19	23.26	17.32	11.58	22.38	34.88
ENSG00000108176	5.41	21.94	5.66	40.07	5.06	18.89	28.41	24.9	24.37	24.27	25.35	35.73	45.75	26.86	28.76	48.45	35.55	36.31	42.2	51.78	35.03	45.04	36.98	47	41.35	45.89	32.86	52.59	39.15	57.64	50.94	60.2	56.06	16.35	58.13	57.33	44.34	41.56	35.56	34.74	44.93	24.43	39.38	22.48	97.23	65.32	76.46	37.36	44.46
ENSG00000108179	19.41	20.26	62.61	49.04	18.75	22.83	21.75	22.06	17.69	37.74	36.79	23.86	43.77	41.57	28.43	22.83	21.14	30.98	31.29	43.27	20.62	15.21	32.97	43.92	35.09	20.86	31.43	40.25	39.28	36.77	28.37	20.07	28.14	46.93	25.28	37.86	48.48	27.94	38.46	24.04	33.94	42.37	36.11	16.13	42.76	28.6	34.52	29.39	32.87
ENSG00000108239	12.5	15.64	3.55	9.84	5.01	3.94	5.83	7.3	12.57	7.34	4.61	14.83	13.24	1.74	5.48	5.09	5.92	19	8.82	9.8	3.56	9.32	7.4	4.81	8.8	6.06	3.94	6.94	2.52	4.88	8.03	6.82	9.3	2.96	10.3	16.7	5.92	5.93	9.86	5.53	10.92	11.42	9.75	7.42	7.59	8.77	5.67	6.57	8
ENSG00000005100	16.19	19.05	22.13	16.14	12.94	10.02	8.95	8.71	17.47	15.52	10.73	15.5	9.1	7.46	12.07	16.62	18.45	12.67	11.96	21.88	13.01	16.68	17.47	11.36	14.28	9.75	11.29	9.94	8.12	14.43	16.04	10.91	10.42	9.99	15.69	12.21	13.21	6.72	23.86	11.87	13.77	16.11	11.11	21.24	19.75	12.55	8.39	17.25	4.45
ENSG00000011260	44.24	35.09	30.72	36.5	10.82	40.84	31.69	32.97	32.28	30	29.25	29.48	31.13	21.33	20.05	39.32	26.31	26.12	34.5	32.4	35.18	31.23	37.71	25.36	31.95	55.84	24.61	33.5	23.6	50.02	36.72	42.32	42.29	14.99	38.76	42.99	34.92	31.6	25.58	32.32	24.28	34.55	36.5	29.92	34.59	39.15	24.18	34.72	36.89
ENSG00000121053	1.97	2.2	0.94	0.54	0.37	0.58	1.93	2.14	1.22	1.54	3.05	0.78	1.4	0.92	1.39	2.1	0.56	1.43	3.37	4	2.09	1.54	1.47	2.54	0.78	2.67	1.45	3.82	1.11	0.64	0.88	2.39	1.87	1.68	2.63	0.94	2.07	2.29	1.35	1.29	1.37	1.11	0.24	0	3.42	1.61	4.74	1.69	2.35
ENSG00000108256	27.46	18.38	13.4	31.97	19.88	10.24	18.14	12.66	29.08	10.41	9.75	16.19	18.24	6.1	12.33	16.75	11.26	17.68	18.7	18.36	12.84	21.59	22.35	18.44	14.87	10.5	3.99	12.78	9.28	14.58	13.91	10.69	7.1	7.7	14.03	14.08	14.04	7.71	26.08	9.72	13.52	15.06	14.07	54.64	11.43	15.19	24.81	11.87	6.36
ENSG00000108270	23.03	22.54	34.68	25.12	13.9	17.64	15.12	17.01	17.59	18.57	22.94	19.13	23.06	19.34	17.34	17.7	21.47	25.76	21.33	23.25	20.39	22.09	16.99	21.33	25.08	21.98	33.9	20.05	20.66	28.05	24.54	22.97	20.21	30.02	22.5	24.35	22.75	29.88	30.44	23.33	31.04	19.77	23.57	17.94	27.26	21.21	24.38	21.2	29.39
ENSG00000108278	84.56	61.76	36.07	73.71	13.71	83.72	68.87	71.77	71.83	68.7	59.09	62.78	61.43	54.42	70.93	79.33	68.64	60.09	55.18	68.56	74.47	64.21	65.4	64.14	75.71	84.89	54.61	93.92	71.86	94.27	77.6	87.27	104.34	24.54	85.71	83.44	59.59	75.94	51.29	77.31	72.4	60.39	72.22	71.7	107.03	90.39	75.62	62.48	126.32
ENSG00000108298	871.88	554.75	1329.38	1121.19	290.54	844.79	653.48	526.37	364.23	504.95	383.18	410.63	482.79	466.07	541.34	398.82	461.01	567.05	422.02	336.99	419.16	272.32	291.22	513.46	350.31	584.11	462.63	584.35	773.51	460.61	485.42	668.95	621.1	577.11	413.35	553.88	473.49	773.78	399.87	425.56	601.95	347.84	712.75	369.03	464.97	578.2	602.29	302.72	943.13
ENSG00000213246	88.98	53.58	50.41	61.29	43.71	77.14	81.46	71.55	56.7	78.03	54.54	69.35	89.33	121.25	87.3	67.07	69.67	66.2	62.27	56.37	80.28	63.67	42.52	68.21	70.86	73.52	85.63	97.56	117.54	82.26	85.91	64.61	63.55	103.81	80.21	65.37	78.78	83.34	63.89	62.32	85.74	57.94	87.17	18.96	91.25	65.35	86.93	60.2	126.1
ENSG00000108379	8.32	9.3	4.06	9.38	2.83	5.56	6.35	2.06	2.82	1.7	4.89	1.13	2.69	4.42	6.43	5.66	5.91	4.39	8.85	5.86	4.02	2.59	2.82	6.11	4.47	3.85	3.34	4.41	6.4	2.89	4.68	7.14	7.71	7.53	1.27	8.58	7.52	3.77	7.35	3.72	2.64	8.11	6.88	0	5.26	3.09	6.72	7.89	2.26
ENSG00000197417	11.11	9.86	26.53	12.6	11.91	12.49	20.59	11.14	9.74	10.99	5.91	5.21	17.44	8.78	15.74	11.18	6.03	9.48	14.27	11.71	4.34	6.08	8.93	9.5	10.63	11.64	7.69	6.99	9.68	5.35	9.18	5.29	5.33	10.22	9.85	8.97	6.5	5.97	14.56	7.85	11.99	3.32	8.72	21.72	10.98	9.63	7.05	7.62	18.55
ENSG00000213977	27.26	20.96	28.49	14.08	11.15	10.02	21.47	20.91	10.59	15.29	24.22	11.89	6.07	13.93	14.49	14.57	14.52	9.89	21.26	16.51	13.57	5.01	2.12	33.04	10.08	8.67	2.51	6.62	12.03	3.72	9.58	20.68	20.84	12.11	13.31	8.14	5.98	22.63	7.79	5.59	17.87	5.77	14.47	0	15.8	0	17.31	18.82	20.36
ENSG00000108433	41.51	28.14	36.81	36.4	34.68	49.01	51.97	54.89	57.05	45.85	34.95	37.61	47.02	57.3	74.88	36.98	46.46	47.45	62.79	29.25	45.1	41.88	39.86	33.54	57.67	49.08	54.62	51.35	71.92	46.73	44.54	36.47	37.6	44.72	45.63	42.8	35.34	35.51	30.92	39.18	38.48	34.79	48.83	31.36	51.77	36.03	38.35	37.05	69.53
ENSG00000108439	7.19	12.07	5.52	8.49	15.36	15.11	15.83	17.51	18.51	17.28	17.26	20.48	17.37	22.2	21.84	18.67	13.87	17.14	23.24	17.92	8.87	12.07	12.13	14.94	15.7	15.69	29.49	14.98	21.76	20.21	12.13	18.01	23.73	24.84	19.5	19.01	29.47	12.8	12.92	20.21	19.76	17.4	11.22	8.54	20.25	20.18	13.7	17.02	7.67
ENSG00000175106	5.83	2.72	12.19	1.34	0.45	2.86	5.44	1.33	4.23	3.81	0	4.84	6.05	1.14	3.44	2.08	0	4.94	4.55	6.12	3.23	4.76	3.62	5.5	0.48	2.47	0	3.78	2.74	1.59	3.82	3.28	3.3	1.38	2.71	3.48	2.84	2.42	5.55	2.65	7.64	1.65	5.89	0	5.63	4.77	3.09	2.98	5.81
ENSG00000108443	23.72	12	5.06	11.67	6.33	8.72	16.21	14.25	17.9	3.48	16.79	15.48	14.07	4.62	6.8	15.4	7.22	13.93	16.74	16.14	17.25	17.7	20.7	11.87	11.97	13.41	5.82	13.72	6.38	10.49	7.3	16.37	14.2	4.42	14.5	14.16	13.88	10.78	16.14	12.03	15.8	14.03	16.44	14.08	12.77	14.79	18.29	8.66	10.12
ENSG00000108474	8.58	11.65	9.51	12.66	4.58	15.31	8.58	14.2	7.61	7.56	22.17	7.94	6.54	8.59	5.21	14.41	9.57	4.45	20.07	14.84	12.2	11.4	12.94	14.85	11.48	8.31	6.31	13.1	4.32	8.03	8.27	14.87	10.82	6.97	14.36	14.63	10.04	18.32	12.61	11.38	6.43	13.14	17.84	30.55	13.5	9.03	15.57	15.04	7.32
ENSG00000108518	496.8	529.19	1654.07	1066.83	680.84	854.79	652.89	688.71	432.79	765.64	516.42	597.47	736	906.04	609.7	480.64	613.02	513.4	521.62	490.78	578.57	387.27	381.08	556.15	495.28	548.42	735.31	749.82	779.59	560.98	569.37	640	616.56	1000.4	425.94	508.61	521.42	1184.38	793.08	635.32	589.43	449.55	952.68	345.91	674.05	558.75	579.88	374.68	775.29
ENSG00000108528	86.32	126.64	111.26	119.51	222.84	247.52	169.93	224.9	179.47	256.85	224.73	186.96	211.43	379.82	266.48	222.01	253.11	161.81	208.61	192.54	206.53	179.51	191.69	200.26	269.22	271.8	335.87	283.22	338.38	286.2	258.43	220.7	282.18	252.77	224.65	241.3	254.6	222.09	157.76	230.19	209.14	196.8	185.56	149.13	233.32	194.44	163.91	242.81	254.06
ENSG00000108551	87.83	54.98	340.35	426.8	25.87	35.79	72.19	26.68	88.37	121.51	295.44	115.13	140.17	230.81	143.42	152.57	87.46	130.89	89.34	312.66	202.18	104.23	163.11	558.48	179.3	356.23	213.58	246.79	279.61	228.42	245.75	404.23	93.39	269.45	110.82	219.96	350.33	506.47	224.78	154.9	99.29	92.67	79.32	162.61	272.8	131.25	246.75	205.62	77.01
ENSG00000108559	31.93	17.45	28.17	28.74	14.75	21.34	25.91	20.78	19.16	19.33	15.47	27.66	20.66	12.08	17.23	20.36	17.52	20.27	23.2	21.62	21.92	18.47	21.64	20.23	23.07	21.85	15.22	20.1	17.16	29.33	22.64	15.9	17.75	12.64	21.67	24.91	28.03	18.37	21.98	20.61	24.1	20.68	22.66	25.62	26.29	18.11	19.35	21.6	24.93
ENSG00000108561	192.16	154.26	223.82	260.81	125.79	269.21	188.48	229.58	154.25	198.96	197.9	175.4	169.31	237.78	215.72	180	212.14	166.31	169.88	170.98	188.84	151.37	167.85	189.09	210.09	263.81	249.93	249.61	267.88	246.33	214.94	226.42	239.77	164.34	207.58	210.67	170.92	288.27	136.46	191.77	190.39	150.33	193.85	165.99	181.96	223.43	169.16	193.8	210.32
ENSG00000108587	8.58	6.6	7.05	7.39	3.01	8.67	9.76	5.12	9.33	5.41	4.85	5.34	3.82	3.13	6.84	6.31	6.09	14.01	7.53	10.39	9.97	6.83	10.66	6.07	6.87	6.37	6.31	6.25	10.6	8.2	9.65	4.34	5.83	3.81	7.78	11.52	6.28	8.01	11.03	7.03	5.62	8.47	8.46	13.37	11.19	11.41	8.85	3.29	6.41
ENSG00000108588	43.94	50.38	37.2	72.42	28.33	47.43	68.93	67.5	64.97	29.63	53.55	89.25	94.05	26.64	44.15	91.87	65.18	83.52	89.36	97.01	91.95	106.75	100.91	88.54	86.92	84.91	48.71	91.35	47.5	114.55	74.09	91.51	94.85	48.24	110.82	103.59	77.8	99.75	104.27	76.58	79.24	121.8	82.31	90.12	88.34	86.94	69.94	80.21	48.19
ENSG00000108590	38.75	37.63	15.83	30.91	10.48	73.46	47.12	44.49	43.08	40.02	61.93	43.7	45.37	35.73	56.37	39.24	27.52	34.03	38.17	24.7	66.35	32.95	40.55	42.85	46.25	93.4	28.52	55.5	61.89	53.48	42.41	57.76	55.42	17.4	67.15	60.87	41.78	33.87	26.81	32.31	33.87	52.95	61.84	25.42	49.65	51.74	56.99	27.53	54.84
ENSG00000108591	12.85	8.08	12.94	15.49	10.88	12.98	17.99	13.14	15.96	17.11	21.27	13.2	20.72	13.6	21.62	18.45	20.53	18.64	13.15	15.56	15.46	13.76	12.47	13.62	8.71	21.11	14.18	17.16	13.6	11.84	16.7	13.53	24.54	12.56	16.58	16.29	13.16	12.66	14.22	12.72	14.03	19.48	14.61	6.67	21.41	13.14	16.82	15.76	16.79
ENSG00000108599	7.55	12.17	9.02	7.04	4.98	5.22	11.2	10.6	17.39	6.97	16.36	11.95	16.21	5.71	6.93	14.96	10.1	11.92	15.94	16.14	13.27	20.01	16.01	17.59	17.74	12.43	5.56	8.63	4.7	16.02	10.49	11.08	7.85	4.74	13.88	12.99	12.22	9.22	16	12.86	4.27	13.54	11.85	20.3	13.13	12	11	11.99	1.99
ENSG00000108639	4.27	25.09	44.66	35.32	15.97	31.41	26.93	17.48	13.27	49.12	44.17	64.95	57.04	22.46	30.28	19.41	31.87	31	21.66	49.69	32.63	19.88	11.95	43.16	15.8	41.68	17.3	16.61	37.7	19.84	33.62	33.13	39.19	74.43	31	65.05	32.51	60.31	61.05	30.35	29.88	24.12	51.83	8.88	48.3	15.74	67.84	18.36	54.26
ENSG00000108666	8.14	15.17	12.96	15.42	3.49	8.47	14.72	12.94	12.64	7.6	9.64	9.46	9.66	3.17	11.53	13.41	13.97	14.76	23.27	17.08	6.75	11.29	13.9	10.96	16.38	20.13	8.48	23.07	6.22	19.26	12.58	21.03	29.02	3.86	28.38	14.57	15.48	14.64	15.5	8.89	16.59	16.46	16.86	19.72	23.58	14.43	13.78	10.4	19.25
ENSG00000108733	28.42	11.71	11.16	14.42	5.94	15.39	24.61	19.37	10.69	7.55	7.73	10.43	25.95	6.55	16.96	13.19	11.68	15.73	11.08	21.01	14.4	12.08	12.54	19.94	16.22	8.24	15.41	15.26	5.28	24.1	12.61	12.1	16.77	14.35	10.85	15.62	21.45	14.28	24.79	13.07	24.18	10.97	14.51	21.75	13.87	15.91	24.22	16.06	17.87
ENSG00000108773	40.56	44.86	33.43	88.68	29.87	91.06	116.67	108.5	72.85	50.67	121.9	63.71	99.25	34.24	69.04	59.85	39.14	53.73	90.42	108.29	79.9	65.18	68.2	106.86	32.16	60.57	37.64	117.82	34.85	34.92	34.44	104.63	136.87	31.03	92.75	53.95	89.79	72.47	75.84	86.71	94.4	75.39	98.66	23.81	104.77	65.3	122.35	87.65	123.81
ENSG00000108784	13.9	19.89	31.75	23.66	21.97	24.35	22.9	20.91	15.5	13.76	17.44	16.3	22.2	21.97	14.2	10.71	14.52	14.24	16.26	18.82	13.3	7.81	5.59	9.91	11.89	13.18	14.45	15.9	20.2	12.06	15.4	25.92	15.28	25	13.92	12.94	15.56	33.27	22.9	13.4	22.87	7.62	21.58	10.19	15.17	16.73	7.01	6.02	18.33
ENSG00000108786	40.1	51.7	57.17	31.57	32.5	51.73	38.38	55.23	42.2	70.66	50.75	43.22	53.16	80.28	62.05	48.99	66.25	37.4	54.24	49.55	48.89	42.87	40.67	42.98	52.44	57.6	61.43	43.74	59.48	61.24	27.13	55.72	54.48	68.65	44.75	54.22	54.6	49.59	39.75	55.43	37.9	53.57	40.69	47.59	41.26	54.24	29.62	50.71	72.12
ENSG00000108798	2.2	2.46	5.69	6.57	1.71	0	3.08	1.5	5.01	3.7	3.32	1.1	10.44	1.29	7.28	0.39	2.08	2.13	3.43	1.78	0.97	2.15	1.37	2.96	3.62	4.35	2.7	2.85	6.73	1.6	2.06	7.42	2.99	6.26	0.82	0.88	1.29	13.4	14.67	4.01	6.41	3.31	9.79	0	7.23	2.4	9.78	1.35	3.29
ENSG00000108821	1.72	16.43	29.17	22.48	13.02	15.01	134.52	10.41	4.62	7.17	3.33	2.28	1.87	1.56	1.35	5.91	10.98	0.83	28.87	3.24	14.06	3.18	2.73	0.77	0.94	1.13	0.56	0.56	19.79	0.1	9.54	7.08	0.26	199.67	1.38	1.14	0.89	3.96	7.96	3.96	3.34	1.08	72.55	0.79	1.55	1.56	1.58	1.64	1.43
ENSG00000108826	101.18	106.08	115.45	105.79	59.94	213.82	149.27	188.46	99.9	158.04	162.26	145.86	183.3	192.04	204.86	186.39	160.4	136.31	140.9	113.8	137.95	99.08	122.36	151.83	135.38	214.52	231.37	284.46	252.48	169.77	169.59	170.55	299.51	132.31	166.37	161.78	177.65	174.01	93.97	141.16	175.28	131.55	185.18	157.63	144.53	214.41	136.54	106.44	318.49
ENSG00000108829	68.1	80.16	163.38	105.35	127.84	79.92	63.57	60.27	74.97	86.42	60.98	57.75	60.6	97.68	77.04	77.27	83.15	50.27	73.6	47.46	65.04	64.93	70.52	52.13	108.96	66.87	115.18	48.77	96.97	72.45	61.78	49.94	69.8	82.39	54.67	70.6	48.25	59.51	67.6	71.8	60.56	76.19	65.94	99.27	56.79	49.87	38.7	72.58	57.11
ENSG00000108840	98.44	84.24	65.65	65.01	101.28	69.19	61.37	66.62	84.52	87.7	67.31	64.81	76.09	83.09	110.83	54.28	61.92	112.94	56.78	44.91	58.36	50.54	60.42	80.12	62.34	62.56	77.21	59.82	76.91	54.43	55.46	56.85	54.84	76.8	51.19	52.04	68.13	35.4	54.21	61.37	98.38	55.96	56.07	50.75	55.12	83.7	58.71	54.82	127.02
ENSG00000108861	33.29	50.18	57.91	32.9	71.01	58.52	41.55	88.81	175.35	201.27	102.86	147.86	72.13	120.87	172.32	123.78	166.53	114.45	101.59	107.29	105.7	189.92	170.86	77.19	174.1	111.7	138.48	87.21	121.56	108.32	143.99	93.69	83.58	114.22	106.62	109.72	80.48	56.48	89.34	132.85	108.79	110.28	72.86	150.33	116.61	116.08	55.15	104.8	97.3
ENSG00000108924	29.1	34.58	4.35	21.93	21.67	35.43	49.67	58.9	133.92	94.85	118.11	88.38	93.89	55.24	97.32	120.56	108.52	149.77	169.52	165.68	112.31	182.57	191.56	85.25	155.13	115.7	73.63	99.88	68.04	154.52	164.6	117.74	85.27	87.94	118.77	134.1	108.06	53.61	179.85	90.43	65.98	212.51	104.8	177.59	203.49	115.37	67	152.36	67.93
ENSG00000108947	79.44	70.33	59.3	9.12	98.99	14.6	9.27	9.03	41.13	66.81	29.94	26.39	11.78	34.79	28.15	28.31	32.91	19.21	46.46	32.07	21.98	22.69	20.57	10.7	32.63	50.53	19.49	19.3	14.02	18.08	74.42	35.71	4.5	18.83	25.86	23.71	27.12	10.99	22.7	43.4	28.93	14.94	56.21	55.01	42.21	27.09	29.43	56.87	9.89
ENSG00000108950	11.9	8.13	5.53	12.75	12.04	15.55	33.32	4.96	6.16	3.34	3.42	6.92	3.53	5.4	6.09	7.77	2.82	1.44	16.49	2.24	4.83	2.91	1.64	6.41	2.93	2.8	4.38	3.21	5.13	2.53	11.52	9.8	3.14	30.07	2.21	2.76	2.32	8.23	16.24	4.69	6.35	7.83	43.29	2.75	3.06	2.16	14.69	1.62	0.99
ENSG00000108961	51.83	57.96	57.6	124.96	30.94	120.64	77.61	87.35	54.56	65.38	109.75	56.67	62.78	84.08	88.76	66.95	60.32	57.44	63.99	66.96	71.68	45.11	44.72	87.24	79.49	80.58	62.51	137.11	78.24	69.21	67.16	89.3	109.54	60.39	78.74	63.59	86.79	99.21	57.59	65.28	109.46	65	74.21	47.85	92.63	94.25	88.68	49.47	129.03
ENSG00000109047	1.34	1.5	0	13.84	1.25	10.83	2.81	5.48	10.82	11.26	16.44	8.68	10.73	9.39	7.59	1.43	1.9	6.8	4.18	1.95	2.67	0	6.66	3.25	1.98	4.54	0	11.71	2.84	0.73	3.76	0.9	2.73	6.67	4.48	3.2	4.7	4.45	3.06	2.2	4.68	3.02	8.12	0	3.11	2.19	12.76	9.04	8
ENSG00000109063	0.3	0.75	1.34	2.99	0.21	0.77	1.99	2.04	1.58	0.67	1.55	1.04	1.46	0.26	1.48	1.04	0.53	1.09	2.1	0.87	0.4	0.88	1.12	1.69	0.15	1.65	0.33	1.89	0	0.41	0.59	1.01	0.71	0.21	1.17	1.61	1.75	1.37	1.2	1.14	1.31	1.01	1.82	0	1.73	0.49	1.52	1.19	1.34
ENSG00000255604	2.81	1.57	3.02	1.94	0.26	2.89	5.51	2.68	4.89	1.58	7.63	3.36	4	1.31	2.79	1.8	3.19	2.45	9.2	5.17	4.48	3.03	3.84	5	1.39	7.15	2.9	8.74	1.59	3.07	2.53	8.72	10.69	0.4	5.02	4.36	5.26	5.13	3.53	3.68	3.44	5.08	6.82	0	4.24	4.14	6.07	4.14	1.68
ENSG00000109079	28.87	41.79	94.33	35.69	64.68	43.7	42.81	45.16	56.98	59.52	46.64	67.71	46.86	57.53	56.57	64.46	48.86	36.96	37.75	45.26	56.95	63.2	60.15	64.5	67.82	36.01	65.63	34.66	51.55	47.79	45.35	34.93	34.04	50.72	39.81	47.65	52.19	35.96	47.08	60.78	34.88	59.43	41.2	70.56	51.19	60.47	42.61	66.7	40.6
ENSG00000109084	16.73	22.11	18.17	27.24	17.06	17.89	6.39	6.22	6.61	14.5	13.76	9.85	12.18	20.43	14.01	13.01	21.6	20.96	11.86	17.69	15.15	10.43	12.28	14.75	16.5	21.93	22.39	11.83	21.47	22.43	13.68	15.38	7.23	17.3	14.43	12.71	10.68	7.58	17.38	9.97	13.29	16.31	4.61	50.55	16.75	9.96	20.28	10.27	13.63
ENSG00000109107	131.29	308.9	154.16	429.33	422.19	776.37	984.76	630.04	310.68	567.82	684.29	301.75	1709.16	1188.41	1146.76	703.71	698.27	1461.76	622.36	767.91	519.06	396.87	404.64	1460.72	834.45	811.29	1587.73	1359.76	1202.47	1042.77	922.38	639.54	1297.3	783.42	905.56	618.14	1107.69	1237.58	620.06	553.26	1584.47	525.34	627.13	744.61	648.55	990.54	602.37	527.28	1459.89
ENSG00000002549	28.99	44	135.41	185.1	31.21	60.89	64.52	69.18	41.17	46.74	41.81	50.57	99.05	30.54	101.26	58.66	59.57	61.59	68.64	64.21	54.31	38.28	41.82	69.44	45.94	50.05	36.58	65.91	36.54	53.45	47.72	70.86	52.41	40.49	52.58	52.54	48.18	183.97	140.84	58.83	118.55	55.22	87.6	43.02	65.72	78.38	100.28	38.12	75.79
ENSG00000109320	12.49	8.85	89.5	17.78	3.63	10.61	14.57	12.3	10.35	10.12	12.73	11.2	12.1	6.97	9.24	7.86	9.86	13.49	14.93	13.72	12.53	11.28	7.93	14.13	9.58	7.06	6.94	14.3	10.38	7.73	12.64	10.48	13.95	12.83	9.45	12.26	8.93	27.19	15.86	9.4	12.13	11.43	17.34	11.53	15.6	9.31	11.63	9.54	13.68
ENSG00000109323	18.69	14.3	9.01	28.24	9.19	8.68	13.09	11.62	15.28	9.01	13.77	13.07	17.51	4.98	13.48	8.59	9.08	14.99	12.27	12.55	10.45	10.6	13.85	12.98	7.92	10.01	3.86	13.07	7.17	9.31	9.95	9.29	14.03	10.49	16.47	12.92	13.24	13.07	21.55	11.11	14.33	11.1	18.89	9.54	13.49	12.88	18.74	8.45	14.7
ENSG00000064199	21.25	13.86	25.38	36.6	7.45	48.17	35.96	44.68	34.11	31.78	35.47	31.77	23.64	32.06	12.55	47.33	33.96	24.41	31.77	20.59	23.52	41.62	39.61	21.47	27.07	57.08	26.07	41.31	26.25	63.86	44.8	34.63	58.96	20.15	37.56	40.17	43.54	19.12	25.31	24.19	26.31	25.99	40.82	36.79	33.88	43.48	19.12	26.08	29.1
ENSG00000085117	5.02	5.06	103.18	24.91	17.84	14.03	19.69	15.75	4.37	26.47	7.79	21.52	19.67	15.84	10.68	8.59	6.42	13.12	6.27	18.49	2.67	7.87	2.5	22.73	6.44	16.19	11.09	14.64	14.18	8.78	10.73	4.06	19.11	11.43	12.33	27.58	13.52	25.85	18.95	7.13	17.56	11.91	18.28	12.52	13.97	7.4	11.48	9.25	13.51
ENSG00000109861	4.06	6.49	49.89	38.77	7.86	14.93	18.69	8.7	12.62	17.89	7.5	7.23	35.63	8.81	25.9	6.51	16.89	10.1	15.38	6.18	11.17	8.24	5.41	6.56	8.87	6.89	2.99	9.59	6.96	7.92	12.72	8.61	5.12	30.52	4.86	11.43	3.06	48.17	56.04	14.26	14.2	5.89	36.95	12.05	9.08	10.45	41.64	6.05	9.53
ENSG00000109917	52.09	32.07	51.38	54.02	23.79	32.26	24.99	31.12	34.18	35.44	27.6	32.37	24.48	35.2	39.81	35.04	32.01	28.44	37.42	26.09	34.97	33.24	36.73	19.39	40.1	26.8	37.04	30.14	42.54	38.05	40.79	18.94	19.48	31.21	30.05	27.6	22.61	33.04	34.79	35.49	26.09	32.7	30.52	51.06	29.51	27.78	32.71	25.86	33.22
ENSG00000110042	78.16	47.59	63.53	26.62	78.72	26.17	24.62	32.56	41	29.46	23.56	30.73	18.16	30.94	31.08	26.23	37.31	21.73	26.75	17.88	21.33	31.89	24.55	13.68	28.68	17.31	26.2	10.97	22.98	21.35	23.43	15.52	13.86	20.68	17.45	25.66	18.55	5.77	15.14	28.47	22.77	26.47	16.85	18.04	14.09	21.32	11.58	25.31	13.62
ENSG00000110057	0.67	0.37	10.41	7.85	2.51	4.43	3.28	5.48	2.5	4.51	2.6	1.67	2.98	1.17	9.5	1.43	7.14	4.86	4.18	4.22	3.56	1.64	0	4.33	1.98	2.27	0.99	1.3	4.73	2.93	3.77	3.62	5.01	13.34	4.11	3.6	2.75	8.35	14.94	4.39	8.79	1.51	8.54	0	2.72	6.03	7.66	5.76	1
ENSG00000110092	3.61	4.03	35.89	8.28	7.3	14.13	27.77	17.21	24.64	37.74	6.99	22.16	20.32	14.74	30.66	12.85	21.34	16.57	28.12	13.39	15.16	12.95	7.47	7.77	12.44	15.29	16.81	15.18	10.18	5.91	29.05	12.16	8.16	51.27	3.35	15.78	11.96	2.99	11.68	22.32	45.17	13.57	34.26	9.99	7.66	23.61	6.87	8.11	26.93
ENSG00000110104	12.68	9.17	34.74	32.36	25.79	21.38	19.32	17.79	23.63	25.92	29.39	25.64	28.54	43.99	20.08	25.11	24.89	23.8	22.68	26.01	23.27	21.18	25.02	28.32	24.63	32.89	29.09	21.74	37.37	35.85	34.79	23.13	20.77	36.05	17.9	23.15	25.31	34.05	21.31	27.7	23.46	19.78	22.16	40.28	30.69	23.19	25.1	28.37	18.94
ENSG00000110107	28.79	28.91	50.62	44.8	45.34	42.32	36.58	50.52	37.76	69.05	62	60.57	57.4	92.15	54.78	68.67	70.8	67.68	71.09	73.87	74.32	70.21	73.86	65.47	95.66	99.46	112.99	76.16	96.32	110.37	92.28	116.82	112.63	78.45	99.37	91.96	96.1	106.22	61.54	64.66	63.83	81.84	59.49	48.72	88.37	58.02	58.91	94.21	65.3
ENSG00000110108	11.03	12.96	34.26	21.28	15.98	33.25	28.58	29.33	30.85	38.36	33.5	38.49	46.15	49.61	57.08	36.56	63.47	34.42	59.37	51.85	56.4	44.84	35.65	49.92	39.16	43.98	54.4	45.03	56.07	52.44	58.91	52.08	44.97	129.43	36.94	40.83	47.14	74.2	44.14	33.15	36.64	43.59	73.61	32.09	48.6	26.19	35.73	52.13	39.56
ENSG00000110218	53.59	45.48	37.27	10.86	45.07	9.73	10.15	11.18	22.33	15.55	13.85	17.28	9.54	11.78	10.72	20.56	19.25	21.04	14.75	19.85	21.35	30.25	28.2	11.72	28.59	13.9	15.78	9.19	12.01	19.98	13.47	12.75	11.14	17.48	17.94	11.29	10.33	10.99	14.77	12.4	18.18	14.94	12.62	36.67	18.27	11.87	7.61	16.25	6.59
ENSG00000110324	2.9	4.87	15.88	10.99	7.68	2.49	8.8	3.96	7.51	7.05	4.69	3.13	10.33	5.65	17.48	4.39	9.96	3.16	6.03	3.05	5.14	5.45	6.31	3.13	3.1	6.15	3.2	0.94	10.92	5.28	7.07	2.28	1.97	22.35	2.16	4.33	4.25	11.64	16.31	4.23	3.8	4.91	15.25	10.05	5.33	2.77	21.81	3.86	4.33
ENSG00000110328	15.51	38.45	22.54	22.8	41.8	29.27	43.44	29.96	24.73	25.22	38.08	30.66	36.81	57.37	41.04	40.63	54.35	24.01	37.9	23.3	49.77	31.14	35.34	38.02	47.15	42.1	52.89	41.71	64.23	52.82	56.09	41.49	29.86	63.23	24.53	27.16	32.08	65.68	40.48	49.72	28.92	27.72	28.54	53.7	31.47	38.08	42.03	44.74	19.31
ENSG00000110330	83.07	49.37	38.44	90.48	15.65	56.58	53.59	47.74	41.61	19.51	48.61	46.81	56.12	15.75	21.57	46.73	13.28	47.32	41.04	42.14	49.66	44.72	47.56	46.04	19.51	32.83	11.84	46.49	15.04	38.96	21.27	41.93	42.55	12.99	41.5	39.46	40.73	30.33	50.95	41.58	45.23	51.06	58.56	36.14	52.18	47.34	70.15	44.3	38.33
ENSG00000110435	27.53	30.79	16.05	36.13	18.07	31.8	23.41	44.24	39.1	24.26	36	48.35	48.42	21.82	21.83	42.4	26.54	34.24	43.97	40.34	39.17	40.12	35.84	34.96	37.16	37.8	25.09	49.69	12.95	51.21	33.16	39.34	37.86	13.98	45.73	41.48	39.52	27.76	41.21	37.61	43.54	44.03	39.36	49.02	41.8	46.14	39.97	39.42	31.34
ENSG00000062282	3.99	16.51	3.81	12.64	23.87	21.12	7.26	35.36	19.34	25.95	39.7	21.87	29.12	49.4	17.53	21.75	45.34	13.89	26.76	22.04	15.37	17.97	21.32	23.86	27.93	35.19	31.13	10.08	18.02	22.67	25.57	23.68	25.48	18.72	29.39	24.77	14.48	12.59	22.35	25.72	6.97	21.17	13.07	19.89	29.61	12.41	28.89	28.4	7.15
ENSG00000110696	216.54	140.71	96.11	253.99	60.85	148.42	156.73	192.51	177.25	113.21	133.28	177.17	147.13	73.48	95.39	196.29	162.1	161.33	220.21	170.12	172.9	163.33	195.44	137.14	112.52	127.8	79.68	170.63	54.73	180.64	179.27	186.45	157.05	76.98	188.62	191.27	163.56	136.05	180.61	191.04	149.61	152.77	222.72	151.96	159.44	171.23	143.09	165.2	190.15
ENSG00000060138	31.1	14.23	212.73	91.54	5.28	22.86	31.01	8.35	5.27	7.4	14	4.23	55.35	4.95	14.02	12.09	12.05	20.51	29.4	15.07	21.9	4.15	6.44	145.44	7.43	42.36	9.71	13.74	63.85	5.15	49.79	25.42	8.32	55.61	5.26	7.88	8.82	151.79	94.25	9.78	23.06	5.85	89.16	19.58	20.21	13.11	29.33	8.1	19.71
ENSG00000049130	15.72	18.13	4.11	6.77	11.48	3.61	13.07	4.69	10.38	1.1	6.35	6.36	1.75	2.3	4.18	10.5	4.19	7.84	8.43	7.14	5.87	11.06	14.65	1.59	5.81	4.17	3.62	3.82	2.77	10.73	6.63	12.59	6.01	5.59	12.06	5.28	8.63	4.08	15.16	8.59	4.29	8.32	7.75	20.41	4.56	8.84	4.99	3.62	2.94
ENSG00000075856	48.03	48.25	48.86	52.9	30.8	34.08	43.6	37.51	43.2	35.23	44.57	42.31	47.47	33.76	34.63	50.3	49.58	40.72	46.17	54.8	41.35	43.21	40.77	44.23	40.2	37.42	41.93	46.14	32.92	41.65	46.3	43.87	46.29	41.69	49.25	41.18	40.86	46.37	53.95	41.8	43.93	48.86	44.2	40.61	50.5	39.77	45.58	43.87	30.87
ENSG00000013503	5.22	6.24	2.98	4.91	5.55	6.11	7.48	9.06	7.23	7.32	6.6	11.95	9.08	6.79	7.74	10.02	7.59	7.92	9.63	10.12	11.19	11.04	10.77	4.99	8.54	7.05	5.94	5.31	5.03	11.28	6.8	7.04	9.03	4.89	10.47	7.37	6.53	7.1	8.68	10.64	6.43	9.78	8.06	7.89	10.32	10.49	6.33	8.3	6.03
ENSG00000110851	31.55	27.97	20.85	27.52	17.72	13.57	27.73	24.26	33.16	21.27	21.04	33.45	23.9	13.72	23.31	33.73	28.37	33.6	28.27	27	23.62	34.02	34.62	20.88	32.76	25.05	27.17	24.79	17.53	40.16	27.92	31.01	28.51	19.09	30.72	29.25	24.36	19.23	32.04	27.88	27.28	29.74	27.48	30.68	34.24	31.59	20.68	28.63	25.07
ENSG00000110876	4.39	12.28	6.37	11.67	10.56	11.99	16.7	12.83	31.58	35.89	13.78	6.57	12.84	8.8	50.25	3.35	50.81	36.87	10.28	1.82	19.16	26.12	7.41	1.52	26.6	5.85	20.78	15.86	23.92	18.85	8.46	9.73	10.23	80.75	9.46	24.72	8.45	16.15	31.92	29.83	26.87	16.29	40.34	2.61	9.46	14.38	29.49	9.24	15
ENSG00000110881	85.68	74.87	73.53	45.48	82.26	56.1	64.58	52.98	41.89	45.15	37.21	35.46	42.91	38.01	43.8	30.53	45.22	44.83	33.23	29.26	36.37	24.53	29.96	17.02	30	23.82	30.67	30.03	31.39	24.3	23.16	16.42	23.54	28.63	26.13	20.12	28.5	13.22	37.46	33.51	57.7	35.41	28.39	27.23	28.77	36.78	27.95	35.05	29.37
ENSG00000110906	46.3	44.58	47.1	23.62	52.88	18.28	30.61	17.53	35.16	42.3	27.7	37.6	13.73	29.04	30.99	27.04	48.1	33.59	50.81	39.05	21.63	32.32	28.76	15.93	23.67	29.81	25.87	23.33	32.07	34.19	44.33	27.17	22.13	65.83	26.79	24.05	28.6	28.47	34.79	29.98	24.73	32.9	57.2	35.62	28.33	18.24	18.51	35.25	15.37
ENSG00000110917	14.7	24.66	65.29	27.22	43.36	29.72	38.6	23.8	40.53	31.94	20.78	36.63	26.16	33.81	42.32	43.71	46.98	30.66	21.5	36.06	29.89	41.39	44.53	44.55	52.09	25.71	33.13	17.86	34.37	27.1	44.93	30.36	16.23	47.69	30.77	33.46	37.64	30.51	35.18	33.13	34.53	19.71	34.55	45.81	39.94	35.34	25.67	33.27	23.33
ENSG00000110921	28.48	21.99	16.6	23.82	57.35	31.4	25.64	30.97	19.38	42.21	22.78	34.13	26.55	41.98	27.39	21.38	34.19	25.09	26.44	24.64	16.66	20.25	26.12	23.01	27.08	40.26	33.44	25.7	30.63	28.89	24.39	37.49	34.55	19.28	35.57	28.33	25.4	41.1	16.66	32.6	14.82	14.93	28.38	45.08	20.44	14.98	15.93	26.22	31.4
ENSG00000110925	122.24	79.69	80.68	68.18	82.09	64.39	48.16	58.7	57.8	71.59	62.99	65.1	48	50.58	54.71	57.4	62.21	38.77	49.01	53.23	52.24	62.51	58.73	47.58	74.89	49.94	50.99	39.44	48.55	63.26	66.48	35.04	45.72	45.74	38.66	44.61	41.71	29.58	39.6	47.58	43.25	60.61	49.52	65.79	55.07	46.17	51.54	60.13	36.22
ENSG00000111087	0	0.68	2.47	2.01	0.91	2.15	2.55	0.83	0.3	0.82	0.79	0.61	4.11	0.14	0.86	0.78	0.86	1.76	0.95	2	0.32	0.24	0.3	0.98	0.48	0.82	1.25	1.65	1.72	0.8	0.96	1.31	0.5	0.86	1.36	0.15	1.71	2.42	0.28	0.8	1.06	0.14	1.18	1.01	2.11	1.39	0	0.6	0.36
ENSG00000111110	4.18	6.72	1.87	6.84	9.28	4.23	4.39	6.41	18.84	20.81	11.15	18.5	6.51	16.18	16.67	11.18	25.99	15.17	11.01	18.23	13.88	19.71	17.21	3.8	23.97	11.53	20.39	12.7	13.65	16.56	25.56	14.45	7.81	12.64	8.75	17.79	11.32	5.21	8.66	12.57	16.45	21.83	13	8.69	9.7	9.84	6.97	13.15	3.12
ENSG00000111144	69.02	59.04	51.04	59.19	27.98	49.39	58.56	46.12	37.2	35.37	51.97	48.06	56.94	33.1	25.91	51.3	44.47	40.78	47.41	49.16	55.23	45.2	47.14	70.17	51.37	49.62	32.29	51.97	31.29	54.68	49.58	74.58	61.48	36.07	58.92	51.29	52.43	70.58	51.98	49.44	47.14	51.33	60.15	56.97	61.46	45.64	71.7	44.6	56.67
ENSG00000111145	3.96	3.32	12.22	23.18	1.85	8.25	13.86	4.5	6.97	5.18	3.41	4.93	8.22	3.85	3.74	4.94	5.15	6.7	14.41	5.43	5.69	5.82	5.33	8	3.25	2.8	0	2.56	2.79	1.8	7.42	5.78	0.9	9.38	3.68	3.54	3.86	6.57	16.22	3.97	7.5	10.43	28.01	5.48	8.03	8.1	7.12	7.69	8.87
ENSG00000111203	15.38	9.83	14.87	17.15	6.5	9.69	14.35	19.47	20.02	14.78	12.77	18.24	13.03	11.97	15.57	12.92	16.64	18.06	13.13	26.61	10.21	16.49	14.56	17.16	14.44	16.15	22.09	18.5	17.57	13.2	14.4	22.71	25.87	21.86	18.8	17.48	17.14	18.24	18.41	14.4	24.32	20.25	23.54	15.21	25.04	15.58	8.84	14.38	17.5
ENSG00000111224	3.97	7.1	8.06	11.49	3.71	5.84	7.23	8.66	6.91	2.67	7.18	3.96	6.36	0.93	6.75	8.49	5.08	8.64	9.29	3.46	5.27	7.39	5.43	7.06	6.66	6.06	4.68	4.63	5.04	6.94	6.25	5.89	5.93	3.39	7.53	6.64	8.83	5.27	7.72	5.21	8.33	6.27	6.74	3.3	7.36	5.85	6.56	6.34	3.56
ENSG00000111229	132.35	132.87	92.51	245.54	57.63	213.36	208.49	181.48	101.85	120.59	175.88	135.65	139.19	101.01	120.43	188.11	139.93	104.74	130.19	85.25	141.79	152.43	118.67	130.03	126.04	139.03	92.98	135.93	112.51	147.89	130.18	126.76	146.11	87.68	178.78	122.99	119.71	143.6	102.28	153.65	119.61	99.31	163.27	93.72	135.12	153.85	159.51	121.82	161.76
ENSG00000111266	33.15	13.79	28	11.7	6.99	8.62	15.57	8.82	13.56	11.79	9.4	13.7	20.86	5.9	14.32	12.1	16.08	19.65	17.97	16.84	16.1	16.62	10.8	15.35	15.14	10.28	10.71	10.21	12.55	10.16	14.31	10.36	12.91	14.94	13.08	20.51	12.3	13.09	17.1	9.72	16.25	12.55	16.18	18.47	20.85	16.87	16.43	10.91	15.1
ENSG00000111269	13.35	13.68	22.59	7.66	6.24	21.26	12.46	25.79	33.17	32.44	37.37	27.72	17.82	14.29	39.42	26.16	26.86	37.12	48.58	31.26	31.02	38.13	37.32	30.56	30.71	22.64	24.56	45.41	25.12	43.76	26.26	24	33.25	20.56	39.73	43.83	32.55	18.47	38.15	25.53	38.89	47.72	35.08	27.73	42.56	50.98	39.56	38.23	26.59
ENSG00000111321	0.62	2.76	27.29	14.89	6.92	11.35	14.27	9.68	8.82	13.5	5.98	5.23	17.03	10.1	19.25	6.6	12.72	5.82	15.41	11.67	10.66	6.95	4.6	29.44	6.09	4.71	11.36	19.2	19.17	7.76	12.49	16.65	13	35.12	5.17	6.63	6.87	53.83	31.76	8.77	15.65	7.67	32.2	2.57	17.54	10.11	29.02	7.2	20.29
ENSG00000111325	14.57	19.73	25.65	20.61	10.39	30.44	27.92	24.05	22.4	31.82	37.66	21.4	20.48	23.74	31.52	25.42	18.52	15.58	26.32	21.55	13.75	21.03	18.11	23.55	25.71	29.92	19.76	56.65	24.36	21.79	26.3	33.61	35.43	20.72	25.68	21.52	37.26	29.29	22.36	29.75	27.48	29.87	27.44	9.56	25.34	25.11	41.89	27.3	49.27
ENSG00000111331	1.05	1.17	61.54	17.84	2.69	4.04	13.37	6.6	6.82	4.4	1.35	4.82	4.19	2.75	43.93	2.1	7.24	6.45	6.12	13.68	3.82	3.07	1.95	7.82	3.22	2.44	2.12	3.05	4.98	2.14	5.44	2.82	1.6	8	3.07	3.28	3.52	4.34	8.67	3.86	51.89	2.95	11.9	0	3.03	19.69	3.49	6.1	4.3
ENSG00000246705	8.86	21.79	51.83	58.56	16.55	36.45	26.04	16.9	22.01	46.68	18.31	35.3	37.83	23.79	47.69	12.31	18.87	35.98	37.29	48.05	21.17	14.74	9.9	54.38	19.21	49.57	23.46	20.65	68.75	20.32	34.84	64.49	20.46	91.92	23.72	42.29	51.83	170.57	37.45	28.06	38.7	19.99	71.97	22.07	50.3	33.34	39.37	15.22	50.27
ENSG00000111341	10.43	18.67	11.22	18.69	0	15.34	84.74	5.69	3.89	5.85	9.44	11.44	18.57	4.88	5.92	32.35	40.02	0	180.65	23.25	102.53	9.2	16.86	15.18	6.17	30.09	9.22	52.73	282.79	13.68	140.75	336.3	8.51	305.64	12.81	7.47	8.55	278.96	47.71	21.66	38.3	1.18	491.07	0	4.84	29.03	54.34	5.12	24.94
ENSG00000111348	0	6.67	51.08	24.67	10.22	11.7	11.14	8.14	17.3	29	21.85	4.96	58.42	10.46	38.06	12.76	29.67	17.32	31.03	6.75	23.77	10.71	9.89	14.47	13.73	18.56	24.89	11.6	28.08	13.04	19.01	18.78	10.81	57.98	13.32	21.37	17.46	49.55	56.84	26.08	29.56	6.74	60.32	0	23.06	22.79	40.43	2.44	23.77
ENSG00000111404	0	11.69	0.78	18.91	5.5	27.86	34.77	48.11	35.72	8.79	7.6	10.42	17.44	6.11	11.11	18.86	26.92	7.58	51.98	10.76	31.23	14.08	16.24	3.17	9.02	34.36	0	33.02	4.61	11.42	24.24	15.86	31.07	11.15	14.59	11.7	12.24	7.6	21.66	19.99	49.11	13.28	84.8	0	7.58	25.67	2.49	12.03	76.14
ENSG00000111490	38.06	21.28	12.01	12.58	18.94	14.33	9.97	17.72	10	10.06	10.2	6.32	8.26	7.23	7.89	9.76	12.09	11.22	9.89	10.34	7.4	13.03	17.69	10.5	11.9	10.76	9.79	4.51	5.46	12.68	9.91	9.6	11.98	5.5	8.63	9.79	9.06	8.48	9.2	7.95	9.74	15.19	7.13	16.71	15.07	7.09	10.61	9.68	4.62
ENSG00000111581	16.28	10.57	9.9	13.42	2.72	12.18	13.64	13.08	11.92	4.4	8.45	11.01	12.68	2.38	5.36	9.01	3.72	9.7	9.3	12.11	7.14	7.54	6.86	9.16	4.16	7.89	1.5	10.74	3.28	5.24	3.76	13.33	13.23	3.51	10.87	8.16	10.55	18.83	14.62	9.85	13.72	10.99	16.93	2.42	11.63	13.09	9.6	8.38	18.24
ENSG00000111615	28.89	13	6.31	51.46	8.56	23.83	36.02	27.87	42.91	10.67	25.5	23.53	28.85	11.11	11.49	35.41	10.51	33.23	33.53	31.07	33.69	47.27	45.54	29.61	11.46	22.71	10.37	34.24	12.43	21.17	15.45	28.99	38.3	12.53	38.94	34.5	32.17	31.01	33.83	21.56	32.03	35.4	33.34	32.21	45.34	37.49	35.8	26.38	23.16
ENSG00000111639	175.3	106.19	216.85	284.65	66.31	322.14	230.86	233.33	208.74	221.16	233.26	220.47	295.29	231.57	343.1	254.33	246.04	266.45	288.06	192.1	286.8	176.77	197.08	300.16	236.62	329.19	291.81	438.08	315.2	327.2	251.01	361.63	415.41	179.53	273.69	342.58	300.47	343.06	209.91	237.15	344.72	210.83	325.27	147.39	315.72	362.08	283.62	202.34	551.8
ENSG00000111640	2380.48	2351.61	3743.55	4251.61	3868.17	4918.91	4086.63	4648.9	3605.44	4903.63	4086.88	4325.27	7189.28	7984.55	4937.5	4682.58	4653.66	4091.87	3972.71	3660.9	4920.97	4075.88	3994.89	4781.74	5769.05	5972.12	7873.17	5553.39	6866.04	6136.14	5443.59	5367.24	6866.73	5571.61	5335.33	5054.86	5246.92	6468.52	4052.94	5023.45	4174.92	3977.57	4504	3914.56	4188.61	4022.16	5171.26	4377.75	5135.88
ENSG00000111664	27.54	25.85	18.8	88.1	1.84	26.75	45.46	30.85	32.39	14.89	34.96	19.12	21.89	0.57	13.25	18.4	13.27	22.84	41.43	22.4	31.35	21.67	26.28	20.67	7.76	13.35	1.45	30.59	5.55	4.84	7.74	22.55	60.82	2.8	24.7	17.03	31.09	14.7	19.11	33.32	41.27	38.31	26.25	0	45.05	32.2	41.23	32.6	38.21
ENSG00000111666	64.75	60.97	74.79	163.15	25.08	142.15	126.45	95.83	60.34	43.47	73.21	57.74	145.56	56.72	97.8	81.97	70.19	100.74	72.42	80.07	62.78	61.73	42.87	196.19	58.8	74.42	65.83	85.28	124.46	93.08	109.65	80.99	67.72	70.26	86.53	91.03	87.26	147.12	164.08	80.06	82.65	42.79	66.13	49.55	105.18	120.62	185.03	61.17	120.9
ENSG00000111667	93.14	131.04	92.77	70.18	228.75	99.36	94.87	111.86	111.34	165.34	143.59	147.78	105.92	215.02	122.23	151.68	163.1	136.1	137.92	158.01	157.82	157.55	169.42	131.5	192.77	183.64	271.45	132.99	211.91	198.19	172.54	172.07	169.27	223.75	180.89	158.16	164.91	155.77	119.91	173.23	104.61	130.18	128.26	131.31	166.63	100.71	106.77	153.09	124.56
ENSG00000111669	137.36	322.87	349.38	367.98	533.68	436.6	349.07	517.64	447.24	596.91	476.6	575.49	641.75	1051.03	581.35	593.48	530.24	502.84	506.84	402.99	652.72	504.4	508.9	353.53	865.24	652.58	928.54	563.64	828.52	796.95	683.4	496.53	642.87	711.64	570.68	548.15	506.93	408.66	446.31	605.22	376.83	394.8	590.08	417.44	513.11	454.87	374.78	458.13	442.69
ENSG00000111678	837.33	532.19	1021.56	1007.58	710.19	861.67	563.97	575.16	482.01	650.15	534.12	498.59	522.53	866.57	812.68	551.79	489.29	490.54	439.73	371.77	451.75	372.59	296.33	513.85	558.02	999.54	639.62	807.55	882.68	554.69	501.59	640.32	900.07	516.92	441.26	670.64	535.96	723.33	289.54	464.4	676.21	574.26	543.8	273.01	520.97	622.8	472.52	344.7	1057.64
ENSG00000111711	27.12	11.91	5.78	28.02	8.14	12.81	16.27	22.45	33.69	7.6	17.52	17.37	29.3	1.13	12.35	15.53	22.01	18.26	37.76	15.01	16.72	28.45	38.51	20.34	13.37	18.07	0	16.94	4.1	14.81	10.89	24.81	11.84	6.88	32.43	18.5	28.34	19.3	21.03	20.1	16.93	33.89	15.27	40.23	21.33	15.85	14.76	19.02	8.68
ENSG00000111725	31.79	33.33	42.71	38.32	43.17	27.02	29.91	25.73	33.33	31.75	26.31	31.68	28.29	38.29	40.13	32.92	42.33	20.9	26.34	37.06	25.06	28.7	33.95	28.9	31.34	32.86	37.29	28	25.94	26.05	26.8	26.79	27.67	33.9	26.06	28.46	31.4	51.96	41.44	33.65	26.91	43.73	30.12	33.02	26.49	21.95	30.28	34.75	28.2
ENSG00000111726	72.41	93.09	35.48	85.69	36.15	156.49	110.49	148.51	86.13	103.41	137.55	131.38	94.18	64.33	77.63	151.5	92.3	70.93	130.79	95.65	122.85	120.6	104.2	80.01	109.22	126.49	70.14	132.92	51.98	140.31	85.92	128.52	109.32	41.8	145.41	137.8	109.39	81.18	50.93	135.58	63.82	89.07	131.74	97.7	99.37	84.58	131.27	109.37	103.54
ENSG00000111727	27.5	14.05	7.1	18.01	6.19	11.48	12.12	13.89	18.56	2.86	9.43	11	9.37	2.78	4.81	9.98	5.3	11.08	15.62	10.69	11.49	10.64	13.08	6.86	4.35	6.62	3.5	9.24	2.64	8.53	6.3	9.16	7.84	3.38	10.8	11.96	10.13	8.46	13.58	9.83	10.09	8.81	10.71	16.92	13.77	11.39	10.35	11.04	6.59
ENSG00000111729	1.35	3.03	4.04	25.16	0	3.98	14.21	5.53	5.88	0.76	5.24	2.7	2.41	0.79	3.83	3.62	1.92	1.96	4.22	1.97	0.9	3.31	3.36	3.28	3.33	4.59	0	3.94	2.86	2.96	4.56	4.56	6.43	0.96	4.53	5.65	1.58	6.74	3.09	3.7	1.18	2.29	10.67	5.62	3.92	4.43	3.44	4.15	2.02
ENSG00000111775	52.53	60.58	43.13	156.05	75.17	147.21	124.12	98.48	69.35	139.9	59.39	107.98	102.26	170.64	111.67	77.21	72.28	100.03	84.49	81.12	80.65	75.55	106.07	103.46	223.35	133.65	132.89	137.2	120.49	157.83	177.14	119.54	200.74	58.35	73.29	84.27	142.19	87.22	61.92	154.25	120.51	64.85	115.48	81.84	129.4	102.1	95.91	92.67	171.65
ENSG00000111786	297.38	273.04	454.05	344.52	170.53	342.78	331.23	358.23	251.93	315.48	319.85	282.06	329.29	335.49	325.68	308.86	253.2	253.72	330.73	229.2	310.72	244.04	244.6	273.05	284.86	272.25	361.85	449.91	293.35	352.59	280.15	299.62	424.71	312.32	271.56	284.42	274.91	335.27	275.2	262.16	304.2	281.31	399.63	196.55	351.59	327.71	342.29	245.72	378.6
ENSG00000111790	16.96	11.85	8.23	19.71	2.97	24.15	32.65	25.29	34.24	10.1	30.13	43.31	26.41	10.52	14.27	44.19	15.06	33.83	50.42	58.54	47.85	52.93	64.53	47.96	21.42	32.36	14.04	52.53	13.46	49.79	30.38	57.89	52.56	15.07	60.92	56.94	53.35	31.68	31.5	33.58	25.01	49.65	45.64	44.03	58.36	40.77	55.87	46.18	23.75
ENSG00000001084	18.99	28.79	7.06	26.45	14.2	23.57	25.7	18.99	31.98	24.13	37.62	36.8	31.54	11.83	16.45	30.22	27.27	43.47	38.17	40.27	24.65	27.89	31.46	18.75	24.13	26.12	13.04	25.01	11.32	32.27	24.9	22.19	33.83	13.2	41.21	44.83	30.87	26.63	31.83	25.36	27.29	40.96	28.41	43.83	23.72	38.33	30.28	28.74	15.76
ENSG00000111834	2.25	1.05	1.57	4.91	1.75	2.21	2.63	2.3	1.17	0.21	2.67	1.87	1.67	0	1.6	3.81	2.13	0.54	4.98	1.27	1.5	1.84	1.87	0.3	3.15	0.64	0.28	0.36	0.79	0.41	1.06	1.27	1.28	1.33	2.1	1.12	0.44	1.56	4.08	1.64	1.31	1.48	1.37	3.12	1.31	2.46	1.19	0.23	1.12
ENSG00000111843	33.35	34.64	93.9	60.72	20.04	59.54	53.38	32.48	51.8	58.78	56.95	60.55	53	72.35	69.22	59.85	55.84	43.21	70.6	64.64	86.99	40.83	38.49	63.53	82.21	96.98	43.83	78.72	94.16	92.41	80.34	118.87	134.34	67.75	51.85	79.64	93.42	90.99	49.02	65.08	66.63	45.72	83.8	69.28	85.62	93.59	62.03	55.55	110.33
ENSG00000111850	65.93	39.94	22.97	28.39	11.55	30.29	51.93	44.95	37.55	27.73	35.5	36.96	39.11	14.44	21.41	63.14	29.27	35.87	40.7	23.96	27.36	21.52	29.01	42.17	32.5	34.95	14.15	48.05	15.51	31.51	35.51	38.9	33.59	13.67	38.33	34.44	43.41	20.53	31.4	49.53	60.02	35.66	48.31	34.24	27.07	51.71	41.87	35.4	28.73
ENSG00000111875	34.14	13.22	17.25	45.23	2.45	32.82	37.7	30.44	16.32	11.05	21.21	16.36	33.89	4.6	14.89	25.97	9.33	26.67	27.65	31.18	23.54	14.79	17.13	28.65	13.59	21.16	7.73	24.25	14.83	20.8	21.4	23.91	24.09	6.54	20.52	21.17	30.74	17.44	27.02	18.65	35.58	17.05	30.26	16.37	22.84	30.09	40.87	16.92	19.62
ENSG00000111911	54.43	45.24	12.3	22.29	13.75	24.87	25.75	39.11	56.67	25.57	32.32	45.45	35.35	6.01	22.93	40.89	20.9	36.28	34.42	40.62	33.21	46.1	53.01	34.47	22.48	21.21	14.07	27.16	12.46	24.91	30.59	31.74	15.99	8.37	22.99	27.22	32.72	24.43	35.31	32.15	38.57	29.89	42.82	85.56	29.84	33.71	19.62	38.82	26.37
ENSG00000112029	7.21	2.02	6.82	6.21	1.4	4.86	4.63	4.51	2.99	1.35	2.33	3.59	4.28	0.35	2.13	5.14	1.71	3.49	2.34	2.91	5.19	2.06	2.61	3.4	2.37	2.55	1.33	2.34	1.27	1.64	1.01	3.65	0.41	0.85	5.7	3.59	3.17	2.99	3.43	1.97	4.2	1.7	3.64	2.5	4.18	4.43	3.82	1.84	5.39
ENSG00000112039	11.03	8.97	19.46	15.54	7.26	6.26	8.42	3.76	4.36	4.5	2.27	3.5	6.25	3.22	4.97	2.14	6.41	6.91	3.91	6.31	1.66	2.7	2.8	3.24	4.7	3.83	2.95	1.46	3.18	4.66	2.82	4.06	2.72	5.7	3.92	2.99	3.52	8.32	6.59	1.92	4.38	2.83	6.08	2.08	5.23	2.87	8.28	1.85	3.74
ENSG00000112062	29.83	31.27	29.84	26.2	28.23	16.99	19.84	15.25	31.51	21.74	23.13	27.5	23.23	18.29	21.67	31.89	23.83	22.72	29.66	24.93	26.24	35.78	31.97	12.65	38.6	18.34	27.44	16.67	16.32	28.92	32.27	19.61	17.73	23.33	26.64	28.93	20.51	11.14	34.52	26.07	15.64	33.25	21.71	27.88	22.91	28.68	25.57	27.46	17.82
ENSG00000112079	24.84	23.58	21.73	21.49	8.64	14.01	31.55	11.42	10.77	6.15	12.32	10.94	19.02	1.69	6.14	9.88	5.33	16.76	22.53	10.92	13.42	8.49	13.28	18.21	4.84	7.35	3.4	11.79	6.52	1.89	7.79	12.46	4.71	6.98	13.22	7.93	14.2	13.43	18.16	7.89	20.7	9.78	23.12	9.6	16.74	15.6	27.52	8.15	18.12
ENSG00000112118	8.32	26.24	28.02	14.9	13.99	18.83	27.26	22.01	30.8	29.11	16.77	17.25	25.47	16.32	24.29	21.34	20.56	22.45	25.69	21.44	20.99	14.5	15.3	22.05	26.41	16.37	14.45	14.88	15.03	18	19.45	22.66	23.29	19.64	18.57	15.49	19.09	25.97	19.4	25.82	31.99	15.21	25.23	11.06	19.67	22.33	11.62	15.93	18.39
ENSG00000112167	36.58	30.27	41.94	19.15	16.41	38.72	24.58	30.92	19.09	27.07	28.36	27.71	33.85	33.32	24.88	21.9	32.21	26.53	27.38	24.81	30.11	24.36	25.45	27.19	18.75	19.85	19.38	42.66	27.88	31.17	26.31	22.69	24.85	22.88	13.88	32.31	23.98	31.58	15.89	23.18	23.02	24.77	32.83	12.16	30.53	29.93	37.17	18.85	37.16
ENSG00000112186	53.51	43.14	15.47	26.38	39.48	62.93	47.32	112.88	96.22	84.32	118.62	136.68	94.73	85.85	71.04	153.83	147.6	78.85	120.78	117.06	154.8	164.9	171.46	90.11	150.48	110.81	87.87	92.5	63.6	171.37	134.22	93.04	107.9	93.3	153.7	136.83	112.07	53.31	78.86	132.62	55.62	136.05	93.25	170.81	91.41	100.02	114.46	142.73	57.21
ENSG00000112293	10.84	5.39	1.68	3.87	1.69	4.43	4.22	4.65	10.48	6.08	4.41	7.81	5.72	1.41	6.55	7.08	6.28	5.54	8.14	6.03	5.6	8.65	5.99	2.6	5.54	5.11	2.66	6.24	2.27	3.29	4.29	4.87	12.01	2.86	7.84	7.91	9.64	3.67	5.74	7.24	9.83	10.43	4.63	8.34	5.82	4.6	5.61	4.19	3
ENSG00000112304	51.55	44.84	55.87	65.76	15.17	136.14	104.27	106.73	65.24	72.8	82.65	68.5	103.64	83.63	79.83	108.18	74.58	94.18	69.98	60.13	58.31	64.5	81.85	101.82	52.71	131.16	84.31	139.16	107.8	107.43	96.58	105.56	140.09	50.22	110.82	88.9	124.04	84.01	69.84	110.57	86.77	61.42	92.64	126.92	107.35	137.5	132.17	65.61	125.5
ENSG00000112306	344.11	208.25	469	354.17	67.15	303.53	206.91	183.53	135.82	211.1	100.7	137.18	176.53	180.86	197.95	154.71	182.57	189.42	206.79	138.27	145.14	96.13	104.38	227.34	69.85	279.81	140.03	267.53	274.29	141.54	179.75	264.77	207.65	187.08	155.89	257.36	169.41	295.77	187.4	153.71	268.9	143.94	267.61	109.32	184.2	248.48	227.53	93.16	371.92
ENSG00000112309	98.05	67.37	15.38	74.41	28.34	94.67	65.15	61.18	34.59	32.15	60.12	38.09	48.06	27.66	30.62	36.42	24.19	31.95	36.29	35.42	49.65	32.14	32.01	46.33	24.99	42.28	19.57	41.18	15.25	40.85	23.35	45.94	66.05	15.36	50.08	35.22	52.52	40.7	32.29	39.04	31.23	43.61	39.81	34.52	51.53	32.64	60.68	40.28	39.72
ENSG00000112320	179.14	172.92	75.3	53.77	165.54	75.77	71.47	76.41	105.08	137.48	85.35	85.78	64.12	69.55	95.74	82.38	108.75	96.56	77.27	68.85	97.01	73.99	78.35	63.08	71.54	86.57	54.5	64.19	68.51	69.98	97.87	54.66	42.15	69.02	41.89	57.35	65.02	28.25	77.21	102.24	89.22	102.23	84.37	70.68	51.63	113.85	55.93	101.33	79.24
ENSG00000112335	171.77	249.35	336.33	459.65	146.63	500.18	355	516.81	402.23	439.88	431.1	489.7	465.91	376.17	424.86	524.38	577.12	297.13	499.75	339.27	438.61	369.55	349.92	312.28	448.62	453.82	340.34	457.45	342.7	392.48	459.5	332.97	254.71	266.55	390.81	359.85	289.99	285.22	386.06	614.48	402.73	307.61	421.7	425.42	370.49	489.3	599.96	419.58	419.43
ENSG00000112365	5.79	5.18	3.45	3.99	3.24	3.4	4.59	4.47	5.27	3.24	3.74	4.8	3.43	1.35	3.83	3.92	4.38	4.76	6.32	5.42	4.1	6.99	7.19	3.74	4.75	5.89	2.55	1.5	2.72	6.53	4.34	7.02	3.67	4.11	5.38	4.37	4.29	1.6	4.85	4.21	5.73	3.05	4.44	6.41	3.8	3.79	2.45	7.34	2.88
ENSG00000112367	20.16	16.58	5.67	16.14	9.56	21.14	18.47	19.2	13.08	11.64	24.9	19.65	20.84	14.03	10.09	21.71	15.37	16.56	15.49	18.82	26.38	21.05	21	21.8	18.71	22.63	21.17	21.32	8.37	21.38	18.83	26.39	25.98	10.75	26.47	23.18	21.86	18.71	15.42	20.57	11.4	17.9	18.88	22.17	22.34	19.17	26.36	18.19	18.6
ENSG00000112578	15.02	14.46	30.39	24.14	23.39	17.79	23.37	13.65	16.59	24.33	15.63	15.38	11.14	29.72	21.29	17.39	16	10.89	25.38	15.76	12.74	17.97	19.7	15.51	23.44	14.15	24.56	20.27	35.92	17.32	19.7	17.44	15.87	13.64	16.3	16.93	16.11	15.24	10.97	19.6	10.21	19.31	17.2	13.87	20.8	12.97	7.42	20.99	12.46
ENSG00000112592	46.72	32.76	31.68	36.55	14.8	20.37	22.73	24.83	22.63	21.75	20.97	22.1	23.25	20.35	14.59	24.12	18.56	18.95	21.61	21.87	16.3	21.32	16.73	24.31	22.25	19.47	22.73	18.47	11.18	19.46	20.47	27.23	32.28	19.7	26.51	18.43	28.73	26.95	28.06	16.01	21.45	20.56	28.81	3.29	27.54	20.09	16.59	20.89	14.19
ENSG00000112667	78.56	75.49	93.82	126.83	79.15	169.62	185.62	133.88	102.18	144.53	98.33	55.05	131.07	164.87	120.03	90.54	111.58	103.29	120.61	104.66	94.53	58.89	61.01	128.93	140.38	160.3	135.5	188.47	171.52	134.1	142.11	129.1	168.44	136.13	104.12	84.99	149.42	144.7	85.58	116.68	156.62	80.36	117.61	81.59	103.87	168.76	67.04	100.93	260.36
ENSG00000112685	36.67	25.88	18.77	20.45	22.44	16.26	18.34	20.63	21.7	15.99	19.56	24.22	22.79	11.22	16.5	24.42	21.91	31.25	22.92	25.38	26.09	30.35	26.04	21.4	24.39	20.73	11.14	14.42	8.42	22.89	18.98	16.09	24.12	10.55	28.26	26.06	21.97	15.22	29.61	19.4	23.91	23	20.47	25.39	25.81	19.29	20.52	19.82	16.09
ENSG00000112697	79.57	97.72	54.18	69.67	49.69	64.5	70.81	81.12	110.89	56.71	79.76	122.67	77.43	37.35	60.08	105.73	72.89	103.58	100.91	145.92	96.77	198.08	177.89	92.54	107.42	94.6	41.05	86.73	52.49	149.91	94.05	118.34	73.76	58.16	154.39	135.4	124.05	79.03	135.16	91.01	77.35	136.83	105.99	176.11	98.28	80.95	62.81	146.94	38.88
ENSG00000112769	2.13	2.12	4.26	5.44	2.91	8.03	17.01	7.45	5.75	4.51	3.33	5.14	3.11	1.6	3.98	4.22	3.56	3.85	9.12	5.15	6.15	4.09	3.68	4.17	2.84	3.6	1.45	4.13	5.89	1.66	5.2	6.04	7.22	7.12	3.13	3.44	4.35	3.28	4.6	4.73	11.15	6	16.2	3.15	1.94	5.22	4.05	3.91	8.39
ENSG00000112812	0	0.88	0	0	0.49	3.46	0.37	3.21	4.22	1.76	4.73	2.6	3.26	5.8	3.7	3.63	2.97	1.14	5.71	2.53	0.69	4.86	2.27	3.38	6.18	4.88	8.46	4.06	4.8	4.57	2.94	5.99	2.84	3.34	2.04	3.12	5.51	0.87	2.99	5.43	0.46	5.31	2.22	4.34	2.73	1.28	1.33	2.89	6.25
ENSG00000039123	15.23	10.68	4.62	13.87	4.7	10.62	15.72	16.19	9.46	4.05	11.84	13.89	13.09	4.22	4.57	13.38	4.22	12.17	13.29	11.13	13.54	15.29	11.23	12.31	7.51	8.54	2.85	6.52	4.74	12.69	7.4	16.88	10.17	3.3	15.99	14.17	11.93	10.71	14.16	13.68	12.63	13.69	15.34	13.94	10.92	11.83	12.13	11.56	6.94
ENSG00000112855	59.47	51.96	43.76	56.7	20.35	32.01	53.16	37.65	33.98	33.05	40.82	37.57	41.58	19.85	30.1	33.21	25.64	28.89	40.17	45.79	36.66	35.1	30.35	39.9	31.41	25.22	25.79	40.25	20.61	33.36	25.96	41.17	46.54	19.25	43.56	39.3	45.06	30.86	47.04	29.59	39.45	41.36	42.83	17.65	41.24	29.12	53.28	33.24	33.31
ENSG00000112874	7.56	15.93	3.47	4.01	3.8	8.55	13.03	11.89	12.28	6.52	10.89	10.72	10.87	4.07	5.36	14.3	8.26	10.12	12.7	11.27	12.74	9.11	12.28	9.4	9.17	4.44	4.28	14.69	2.46	12.07	5.88	8.63	10.67	2.07	13.63	15.62	12.93	8.69	18.94	8.89	13.72	15.75	11.99	7.25	10.11	14.28	5.91	9.63	8.69
ENSG00000112941	46.6	41.86	46.19	29.71	23.86	17.49	28.46	27.04	31.73	34.47	22.1	32.61	18.97	23.74	26.7	32.06	26.76	32.01	27.06	33.63	26.66	34.47	29.57	25.64	32.02	26.91	23.72	24.09	19.25	26.27	29.54	26.07	31.32	23.97	23.24	23.97	30.18	20.58	39.39	26.27	32.06	40.01	23.15	28.84	33.05	34.08	17.63	31.64	22.22
ENSG00000112964	0.42	0.71	0.25	1.16	0.98	2.79	2.95	4.6	1.83	0.71	1.91	1.47	2.62	0.25	1.49	3.38	0.6	3.36	1.97	2.86	1.4	1.65	1.57	0.34	1.66	1.79	0	2.05	0.3	0.92	1.89	3.69	0	1.2	0.71	1.51	1.73	0	1.44	1.84	0.74	0.71	2.3	1.75	2.44	1.38	0.54	1.55	0
ENSG00000113070	27.05	26.65	18.46	36.38	27.08	25.56	18.94	14.93	12	13.72	6.66	11.55	12.61	5.27	8.22	8.26	14.64	7.48	15.07	11.23	16.25	6.31	8	15.61	7.62	17.48	7.58	12.52	23.64	4.22	44.89	6.08	7	39.38	9.35	14.61	7.54	10.69	11.78	7.74	9.01	4.36	77.34	26.76	11.95	9.49	10.63	7.9	9.62
ENSG00000113100	7.03	25.04	1.11	29.83	8.47	23.94	28.76	33.06	26.67	10.38	18.89	17.15	13.83	4.54	9.44	18	12.62	21.48	28.58	18.47	24.82	17.58	19.32	14.06	7.85	12.87	4.36	23.74	8.62	11.32	13.73	12.73	10.06	5	21.48	14.58	10.61	12.29	18.4	16.18	19.09	6.68	16.84	9.23	18.67	26.66	15.04	13.63	6.64
ENSG00000113140	53.05	519.1	653.26	292.99	688.09	384.57	582.1	260.64	321.06	266.17	230.46	269.83	241.74	296.99	428.44	241.51	691.18	422.66	691.89	419.2	284.19	183.61	179.01	329.62	247.99	139.62	122.51	188.44	684.26	226.85	438.51	202.28	85.75	1003.37	168.96	194.91	127.94	288.56	269.21	267.84	469.24	134.73	506.45	155.8	194.04	438.64	388.6	166.13	394.87
ENSG00000113205	3.04	3.21	5.85	1.16	3	2.73	2.36	1.38	3.36	3.79	4.8	3.03	1.8	3.75	2.39	3.79	6.24	2.7	3.16	4.09	1.57	1.65	2.31	2.18	3.33	5.16	4.97	5.58	0.48	3.14	2.85	3.87	1.61	2.16	3.2	1.81	1.58	2.8	2.9	2.95	3.54	1.14	2.25	7.02	0.98	1.66	1.72	1.87	2.52
ENSG00000113209	12.18	13.24	14.54	6.52	9.8	16.9	10.89	8.3	10.3	7.59	9.4	11.29	16.25	8.69	10.07	6.33	6.01	4.42	6.59	6.06	5.84	5.13	6.51	15.85	7.17	3.44	5.72	9.53	11.46	7.02	6.27	5.24	4.6	10.1	3.77	6.06	4.55	12.35	8.12	7.02	6.8	9.35	6.56	9.84	5.29	4.15	10.09	8.92	3.03
ENSG00000113211	14.22	11.17	4.85	5.83	9.97	12.69	5.93	3.92	7.78	7.22	10.72	5.57	6.33	5.93	6.72	6.7	9.62	4.67	5.81	7.55	3.6	7.96	5.47	9.58	4.17	4.88	7.23	3.29	2.15	4.25	4.57	2.97	6.44	5.06	3.21	4.45	6.14	4.22	5.42	9.25	7.99	8.6	5.54	5.63	6.08	5.82	3.66	6.03	4.55
ENSG00000113212	7.46	6.26	12.15	2.34	6.02	7.23	7.12	3.93	5.69	2.47	1.31	3.38	5.13	3.17	4.81	4.71	4.58	1.48	2.64	2.96	2.25	3.65	1.47	5.75	1.5	1.73	2.5	3.95	3.35	1.48	3.81	1.83	1.84	4.58	2.08	2.63	3.37	1.97	4.07	4.08	5.04	3.83	6.99	4.23	1.57	2.77	2.15	1.04	4.05
ENSG00000113248	17.08	13.56	22.24	15.06	12.45	13.56	12.44	10.48	12.52	9.39	3.97	6.3	8.51	5.79	9.93	6.94	5.58	7.68	7.19	7.94	6.35	7.69	6.37	6.35	4.55	4.35	2.01	7.64	5.79	3.73	3.84	5.99	2.55	7.29	6.29	2.45	6	7.37	12.11	5.97	11.35	4.63	8.08	5.68	5.54	8.39	6.07	8.6	10.72
ENSG00000113272	11.71	9.06	13.44	6.82	3.79	11.91	11.98	3.68	8.95	6.06	5.24	6.73	5.61	5.26	7.02	7.7	5.76	3.92	5.62	7.42	11.96	5.73	3.92	6.55	7.1	3.05	1.33	6.13	4.45	5.9	8.1	6.07	7.95	3.84	8.04	4.84	4.22	7.48	7.2	4.92	6.3	9.66	6.55	11.22	9.39	10.32	9.72	3.32	2.69
ENSG00000113312	75.34	87.85	60.9	117.73	53.24	108.06	99.07	124.02	94.76	112.83	105.07	135.53	116.11	76.73	96.37	128.18	124.64	141.3	128.98	131.76	144.57	133.61	135.29	122.5	132.26	183.9	119.69	154.48	85.6	188.73	140.98	159.84	184.77	90.15	167.16	163.99	152.18	157.14	98.72	107.92	114.83	118.23	125.38	164.14	142.73	113.54	147.04	127.99	161.96
ENSG00000113441	3.5	3.32	1.61	1.3	5.42	2.77	3.4	1.65	2.68	3.78	2.44	4.43	2.64	2.68	1.72	2.16	6.51	3.72	2.73	5.35	4.12	6.86	5.19	3.7	6.51	1.37	1.79	1.05	1.71	4.12	3.94	2.36	1.28	3.07	2.86	4.02	2.84	0.45	7.09	0.59	3.06	2.89	2.94	17.92	2.5	2.43	3.08	2.81	0.4
ENSG00000113532	18.7	8.36	5.81	9.79	7.69	2.75	3.66	5.61	8.83	6.29	1.93	4.84	2.66	3.06	4.24	5.6	2.66	8.14	4.08	3.26	2.98	7.32	6.97	1.81	2.58	1.9	0.55	3.63	2.11	3.27	3.36	2.02	5.08	4.25	3.34	1.79	2.19	4.97	6.41	3.27	2.61	7.6	7.71	6.21	4.77	4.9	4.27	3.67	2.23
ENSG00000113555	2.27	2.41	4.21	0.94	8.7	8.18	11.61	5.58	5.22	8.53	2.64	3.62	3.84	3.32	6.28	3.52	9.2	2.14	3.37	3.52	4.07	7.45	2.68	2.39	4.82	1.16	1.5	5.52	2.73	1.37	2.3	1.84	2.78	14.54	2.28	2.44	3.19	2.83	6.62	4.1	5.76	3.33	15.98	2.83	2.5	2.42	2.74	3.35	5.09
ENSG00000113569	1.93	1.68	1.53	2.06	2	2.2	1.2	1.9	2.93	1.32	1.52	1.07	0.95	0.75	2.12	1.6	2.59	2.49	1.67	1.56	0.43	2.41	2.66	3.11	3.06	1.63	0.95	2.08	0.76	1.64	3.01	1.88	2.18	1.52	1.55	1.79	1.88	2.13	2.32	1.05	2.43	1.69	1.82	1.78	2.23	2.45	2.45	1.71	0.32
ENSG00000113583	37.45	61.12	76.15	54.38	42.09	38.68	45.35	42.09	45.9	42.56	34	55.98	36.93	20.69	28.69	53.55	49.6	38.91	45.78	39.23	43.68	47.57	53.45	36.8	46.4	40.34	20.11	32.46	18.57	48.1	41.53	34.8	33.69	19.43	41.8	54.98	43.24	33.61	50.9	54.19	22.11	49.69	51.56	46.25	35.78	31.47	46.92	37.88	19.65
ENSG00000113595	13.58	22.78	3.36	15.8	11.81	11.7	12.46	20.11	35.2	7.35	22.99	27.53	20	11.21	7.63	29.28	11.31	27.17	29.57	39.47	29.84	45.62	45.38	16.27	19.39	20.25	9.65	23.21	8.92	36.06	17.37	26.52	21.95	9.99	34.75	24.04	27.13	11.27	34.25	25.07	20.87	36.99	26.41	44.74	33.38	19.92	13.68	38.21	16.79
ENSG00000113643	58.65	40.31	25.29	78.84	10.85	49.7	44.77	43.04	33.65	20.78	43.94	41	34.43	15.22	23.38	43.1	21.12	27.48	42.88	45.38	37.59	33.5	36.69	34.23	26.9	53.54	17.09	44.73	14.08	42.27	36.17	48.33	56.45	12.45	52.73	41.82	48.15	46.66	32.82	38.72	36.66	43.9	53.85	35.53	44.85	45.33	38.8	40.49	38.94
ENSG00000113734	21.77	20.48	31.92	20.45	11.56	23.28	22.87	27.66	29.52	22.2	12.79	20.22	19.38	31.21	21.04	18.52	18.28	18.67	20.07	18.22	23	14.05	22.75	27.19	21.47	25.18	24.77	23.08	24.45	25.41	18.91	16.68	26.9	24.63	23.75	24.22	17.96	9.04	13.01	29.2	18.17	23.46	27.61	28.78	19.51	29.16	23.26	21.86	29.57
ENSG00000013293	2.79	7.6	2.29	6.49	11.57	3.08	4.64	4.75	15.82	15.06	9.69	13.55	4.34	8.15	7.91	6.71	12.63	20.24	8.97	8.62	11.11	19.63	19.28	1.97	11.52	7.39	6.93	4.07	9.35	11.43	13.33	5.41	5.45	12.15	10.12	13.74	11.43	6.08	11.76	6.1	14.02	16.34	5.5	5.8	8.89	5.42	4.65	14.34	5.21
ENSG00000010319	0	4.33	1.54	0.89	5.83	9.48	11.14	4.98	17.9	14.23	1.11	7.71	3.06	8.54	13.41	8.05	13.44	14.66	13.75	8.13	10.56	6.95	4.81	10.77	5.3	1.46	2.53	12.12	8.8	5.17	7.49	5.22	3.51	16.2	5.52	6.67	3.78	2.14	4.67	9.63	13.53	8.5	32.6	5.36	3.24	11.61	3	8.97	6.42
ENSG00000004838	5.25	5.14	8.23	12.65	13.49	12.06	8.73	8.5	7.74	6.25	3.81	2.94	4.09	3.83	3.72	2.45	3.26	4.76	5.63	0.95	1.74	2.25	3.26	0.53	2.26	2.78	2.9	3.19	2.78	2.51	2.95	3.54	2.67	4.2	2.93	1.17	3.46	0.54	3.37	4.3	1.72	1.48	6.37	0	1.9	3.76	4.17	1.21	2.94
ENSG00000076242	12.6	12.78	9.47	13.18	4.8	9.6	9.47	12.41	8.99	8.63	6.03	12.09	10.8	6.81	9.92	9.23	8.28	11.85	11.64	11.08	11.15	10.97	7.25	10.56	13.8	11.08	4.81	8.62	7.9	12.49	8.39	10.38	9.51	6.63	10.94	12.25	9.01	8.13	12.53	8.67	9.38	9.22	10.47	9.69	9.47	9.16	11.85	10.31	8.36
ENSG00000113790	0.37	1.04	0.89	2.05	0.35	0.55	1.82	3.3	2.08	0.63	1.92	1.67	3.31	1.09	2.64	1.79	1.32	4.59	2.9	5.22	3.21	3.09	2.31	6.61	1.65	0.95	1.09	1.81	0.79	3.86	1.46	2.01	1.26	1.32	2.91	2.22	2.61	4.63	5.74	2.44	2.92	2.73	2.26	3.09	1.08	4.87	3.78	1.83	5
ENSG00000113851	37.31	33.22	15.68	28.08	8.07	30.98	45.47	44.74	37.34	15.11	41.96	36.15	27.05	10.89	16.65	42.47	14.23	41.1	40.41	43.51	37.61	36.19	41.64	41.87	21.8	26.95	14.75	55.06	14.14	32.84	25.24	34.47	45.53	10.31	43.95	44.13	38.01	18.93	35.14	39.25	34.42	44.06	51.96	34.44	32.04	29.97	41.68	39.85	19.61
ENSG00000114115	33.99	33.45	193.24	134.87	42.57	96.94	72.35	27.81	44.77	30.49	35.14	26.42	56.87	74.64	66.48	49.42	34.76	56.22	40.29	34.91	40.62	19.97	10.98	62.62	26.81	40.36	70.04	99.1	75.81	31.2	42.8	45.84	29.56	47.37	48.56	45.45	58.89	75.63	36.52	58.68	92.69	13.05	58.55	79.08	24.43	57.86	26.77	20.86	190.92
ENSG00000114268	7.39	4.88	10.43	3.24	4.71	4.45	5.65	2.29	2.5	4.52	1.3	3.01	5.98	3.14	5.71	2.87	3.34	2.92	5.24	1.95	1.34	1.97	2.5	2.17	1.32	1.14	1.98	3.26	2.37	1.47	1.13	0	1.37	1.43	0.75	2.01	2.36	5.58	6.91	2.94	6.46	3.41	2.44	5.58	0.78	4.4	3.84	2.89	2.01
ENSG00000114315	19.8	19.92	44.92	43.64	11.1	37.83	224.52	72.87	17.22	15.54	20.46	3.95	63.42	16.18	14.03	12.7	19.68	22.98	18.52	24.93	21.03	17.45	0	22.39	15.61	30.22	17.48	7.69	16.76	4.33	17.8	10.68	5.38	25.33	17.68	7.09	16.22	49.3	67.88	10.81	44.98	4.47	38.42	49.34	16.06	19.44	17.6	4.86	47.31
ENSG00000114383	29.1	40.68	57.93	60.15	51	103.4	44.15	84.32	82.87	130.55	139.46	101.52	73.38	177.05	175.31	99.82	101.63	59.82	100.24	116.33	99.83	72.44	87.4	78.39	115.97	146.04	124.94	117.85	100.99	123.22	115.87	176.61	107.1	91.39	90.69	99.89	90.85	74.5	67.92	137.8	84.79	69.81	91.2	80.61	77.32	85.35	84.71	136.92	105.07
ENSG00000114388	59.35	41.09	48.53	57.44	19.15	49.86	62.83	50.58	36.88	32.09	50.22	34.86	47.16	30.12	24.03	21.53	28.1	32.81	41.88	49.3	37.06	34.6	32.49	57.09	32.39	29.36	25.48	48.07	22.94	33.97	29.79	48.6	59.52	26.62	47.71	33.74	52.11	50.45	45.23	34.36	39.52	40.68	55.71	17.61	54.47	37.59	65.52	44.23	41.17
ENSG00000114450	15	22.07	11.79	14.68	16.97	5.22	14.37	6.46	13.24	11.95	9.69	9.84	7.03	1.38	10.63	5.91	5.61	9.74	10.47	6.88	6.29	7.34	5.4	7.02	4.67	2.01	2.91	5.37	4.46	7.33	2.66	2.13	1.61	2.25	2.64	7.54	1.39	2.62	7.67	6.9	5.52	4.46	7.66	3.28	5.95	10.98	3.51	5.81	0
ENSG00000114491	15.67	9.7	22.39	26.6	9.94	11.93	20.77	17.93	12.17	13.81	13.02	15.34	15.44	12.09	16.66	16.75	13.91	15.83	16.59	11.66	11.52	9.32	6.95	12.66	11.04	9.97	6.59	17.41	15.8	10.4	12.27	8.68	9.89	17.91	10.31	12.03	14.41	9.76	16.63	10.4	20.06	12	15.95	2.33	14.27	13.74	14.57	15.11	16.72
ENSG00000114648	19.23	18.67	13.9	11.16	25.77	11.9	7.09	11.04	18.55	17.02	11.44	13.11	8.11	14.48	10.76	12.44	19.77	12.85	13.02	16.67	11.42	13.87	16.66	9	20.95	12.87	14.15	5.9	13.57	12.16	16.5	7.85	9.28	17.27	13.56	12.69	10.37	7.14	12.73	13.82	11.06	15.14	11.97	18.92	17.89	10.35	12.85	12.11	2.27
ENSG00000114767	6.02	7.41	14.75	14.94	9.57	13.72	16.44	14.78	8.98	8.1	8.56	8.7	8.04	9.14	11.1	6.44	10.27	8.3	7.51	10.8	9.2	6.19	8.98	9.25	9.2	11.24	12.85	7.61	14.03	9.54	6.77	11.78	10.23	7.28	9.07	5.39	5.99	15.5	4.82	14.15	7.37	9.18	7.31	5	9.77	7.89	2.68	9.61	7.2
ENSG00000114784	316.45	170.34	160.77	247.27	113.66	164.91	147.15	189.97	158.45	156.25	204.45	160.04	201.74	204.11	187.43	210.79	139.21	145.61	187.85	132.72	188.14	148	152.59	204.17	206.05	212.29	234.62	328.18	163.33	286.4	221.66	221.33	275.95	188.04	222.73	249.51	203.17	221.55	130.91	201.27	200.2	179.93	216.26	156.97	193	164.27	221.96	179.69	169.33
ENSG00000114857	75.45	37.66	11.54	37.27	5.25	18.4	52.18	28.35	37.27	4.75	24.73	23.38	24.73	2.15	12.91	23.9	6.01	34.44	40.9	45.65	23.21	32.16	30.75	28.85	5.53	10.3	1.49	27	5.19	4.62	8.48	29.78	23.13	5.49	30.81	17.79	26.6	21.69	47.75	15.78	33.45	26.17	36.16	18.35	24.75	22.44	36.69	25.63	15.67
ENSG00000114902	85.52	85.89	100.24	142.91	81.4	189.74	131.94	150.06	91.5	133.19	122.78	138.1	143.74	164.62	127.93	137.97	169.83	102.24	128.44	121.99	136.68	114.75	101.34	121.56	114.76	210.85	151.51	203.15	186.65	193.78	169.11	195.4	172.14	122.72	175.87	173.93	167.76	231.4	105.89	143.62	125.95	127.81	178.64	111.84	107.4	125.71	96.55	130.21	208.18
ENSG00000114904	17.77	15.11	8.18	17.85	4.15	8.98	13.73	9.59	12.42	7.89	8.13	11.44	13.5	6.48	8.13	8.9	7.36	12.89	10.97	12.91	10.32	12.14	10.58	15.25	9.31	7.85	2.72	12.23	5.49	11.12	11.65	7.99	9.05	5.79	9.92	13.92	7.37	10.76	15.44	11.93	15.53	13.58	8.98	13.84	12.23	16.05	16.22	10.9	11.61
ENSG00000085449	15.07	21.24	17.21	18.5	11.63	11.07	23.39	16.08	23.6	12.49	20.31	18.61	13.41	5.74	14.85	22.76	17.68	22.81	18.9	20.63	16.96	26.3	24.82	13.23	15.5	9.44	5.78	14	7.4	19.32	16.57	17.22	8.9	8.38	18.28	12.9	14.57	10.33	27.33	20.76	22.33	19.59	24.63	32.66	15.57	25.73	14.56	20.1	9.78
ENSG00000055332	8.12	7.19	10.11	14.46	7.59	4.98	9.95	8.77	10.94	4.18	4.37	5.74	3.61	2.37	8.16	5.43	4.33	5.89	7.39	8.53	3.15	11.93	9.67	2.74	6.67	4.02	3.99	3.29	2.39	6.29	6.09	5.48	2.76	3.85	7.56	6.06	6.34	2.81	16.64	6.29	17.16	5.73	6.57	14.06	5.1	16.07	8.6	7.48	3.03
ENSG00000021826	0.36	0.2	0	0.25	0.25	0.4	1.13	0.12	0.33	1.51	0.81	1.88	0.48	0.21	0.64	0.48	0.38	2.99	1.12	3.39	0.6	1.67	1.11	2.32	0.88	1.06	0.66	1.22	0.51	1.08	1.01	1.69	1.83	0.89	2.4	3.75	2.31	3.28	1.23	0.29	1.72	1.92	1.2	0.75	1.35	1.91	4.33	0.77	1.07
ENSG00000071626	110.84	88.81	157.81	134.08	79.58	113.27	88.48	107.35	76.84	115.2	112.66	84.2	75.18	83.68	100.58	74.05	83.04	73.05	74.32	83.82	66.86	61.55	62.15	107.03	54.64	103.74	72.62	93.27	66.78	66.09	60.4	85.67	81.73	61.98	66.76	68.18	102.05	99.32	50.99	70.52	95.69	83.92	95.91	84.23	59.15	76.88	85.84	79.21	95.91
ENSG00000008869	47.19	32.35	13.39	22.02	30.78	21.16	23.35	21.89	28.2	16.14	21.01	25.65	16.99	11.15	13.93	22.49	17.4	22.69	19.53	29.7	24.81	32.52	31.73	20.24	21.56	22.3	14.05	22.33	10.26	24.95	21.55	23.14	23.03	11.51	26.03	26.43	25.35	15.63	23.17	24.72	17.54	25.77	23.84	32.2	25.83	19.14	24.34	23.86	14.68
ENSG00000034510	3116.93	3040.74	4044.16	2954.87	2501.91	4410.69	2458.67	3336.18	1951.31	3069.32	2369.34	2361.11	2081.61	3797.75	2514.02	2654.06	1852.51	2100.49	1777.53	1863.66	2053.43	2056.22	1791.57	2581.34	2338.69	3105.04	2060.52	2529.08	2875.34	2588.39	1872.89	3473.07	1833.01	1850.18	2510.69	2503.34	2244.39	3307.97	1388.13	2801.04	1380.34	864.37	3276.27	1839.22	3020.34	1904.55	3012.83	2154.92	3270.88
ENSG00000095002	48.92	26.41	7.66	29.75	11.19	32.24	35.67	37.49	38.77	14.57	31.82	34.13	29.42	14.78	13.63	40.93	18.21	32.3	38.94	33.18	38.08	47.4	47.37	33.53	24.11	32.9	10.68	40.33	11.67	35.38	25.03	41.63	43.09	10.31	43.49	39.47	37.32	34.45	45.31	31.7	33.61	46.27	39.49	46.25	38.33	31.75	33.64	41.61	23.69
ENSG00000071051	211.27	94.03	149.37	112.44	70.66	120.5	76.68	107.42	92.19	101.03	110.93	86.97	96.83	106.05	101.15	88.75	91.33	79.45	74.39	101.33	74.12	80.61	82.09	81.64	103.1	105.47	93.6	91.33	75.8	88.01	84.99	95.76	72.01	80.88	68.61	82.25	114.14	81.54	86.42	89.95	75.34	124.42	71.99	129.16	99.52	63.03	119.36	107.53	84.44
ENSG00000018280	0.56	0.94	76.87	34.7	0.26	4.53	1.18	1.14	1.74	0.94	7.59	1.95	36.86	0	6.74	0.6	0.4	4.47	2.62	7.86	1.86	1.1	0.7	5.43	0.55	5.7	1.24	0.54	20.15	1.22	4.09	12.08	3.04	3.98	1.87	0.67	1.97	82.25	118.03	1.83	0.98	0.95	2.04	0	5.19	0.92	51.89	1.03	4.18
ENSG00000114999	28.49	55.75	25.52	19.13	26.62	14.13	23.44	26.22	69.47	67.09	30.37	45.78	24.08	27.87	44.41	32.74	56.65	27.9	43.32	28.98	34.99	55.09	48.23	13.81	47.05	30.2	17.3	13.84	17.59	35.02	40.83	25.45	13.06	29.87	29.01	25.51	18.76	6.5	28.09	39.69	38.59	30.55	25.48	53.26	22.29	34.97	15.83	36.27	15.96
ENSG00000115128	269.22	155.31	205.42	407.7	33.94	263.85	204.94	195.18	122.12	122.2	113.19	163.97	150.21	124.78	122.64	143.89	110.77	91.45	161.62	109.72	133.34	84.73	91.6	138.11	82.16	172.14	45.6	128.74	128.18	154.07	141.7	141.18	130.64	68.36	146.66	142.84	108.79	159.65	130.66	112.06	138.18	97.68	226.76	44.38	153.57	206.33	146.54	102.27	210.65
ENSG00000115194	16.61	171.04	12.81	145.88	243.5	300.14	216.59	372.25	248.09	152.11	370.67	296.93	119.48	328.99	167.24	310.35	190.22	65.27	236.39	120.7	242.14	265.99	263.58	126.38	231.65	235.35	297.95	197.74	198.3	215.5	174.26	176.85	134.94	181.07	220.53	139.63	174.57	88.49	100.86	372.05	42.34	248.03	159.91	152.38	186.13	118.94	180.64	322.33	139.57
ENSG00000115234	53.16	100.03	135.17	116.94	182.95	135.71	140.46	173.79	131.39	230.75	178.36	167.48	157.68	307.1	180.25	181.17	208.65	121.07	205.93	160.33	202.26	170.43	165.49	160.26	229.92	240.43	290.25	247.74	279.56	256.67	227.13	219.29	259.39	248.7	217.55	206.42	196.03	215.92	143.08	204.22	150.36	173.55	178.17	182.85	205.08	158.11	127.77	168.71	180.16
ENSG00000115266	129.05	87.82	231.76	45.02	157.38	76.1	47.08	88.54	73.79	128.88	123.46	67.49	64.05	79.16	141.7	44.6	72.69	41.49	36.22	81.3	32.09	44.61	37.15	49.27	40.61	58.93	38.44	24.92	45.79	23.95	51.34	50.68	20.07	41.17	31.39	50.51	66.54	43.66	50.52	76.57	54.95	58.76	34.12	44.19	34.87	48.94	27.39	93.77	33.01
ENSG00000115268	883.25	490.77	1486.53	1181.31	436.83	1141.24	592.56	644.87	454.8	824.02	558.73	498.02	667.85	862.56	784.02	468.15	550.03	543.08	517.67	487.76	452.95	287.09	257.77	721.12	373.6	910.12	575.38	931.83	774.32	500.63	605.24	947.38	605.06	596.48	417.79	711.04	738.17	992.02	380.43	538.95	602.72	438.13	656.43	344.73	525.85	580.98	617.12	457.12	1154.14
ENSG00000115275	41.44	58.38	86.52	65.95	45.63	58.8	66.13	63.73	52.29	49.36	63.3	46.59	44.6	50.09	45.76	38.98	40.16	37.75	50.36	55.88	43.3	36.33	33.13	49.58	40.54	47.68	42.08	50.27	52.15	41.07	40.81	67.37	67.44	41.34	45.9	45.06	50.77	65.61	57.65	56.16	41.55	62.01	54.94	26.69	60.15	46.8	57.33	45.34	53.27
ENSG00000115282	19.67	13.32	25.66	11.41	5.56	15.6	19.94	13.41	10.94	11.03	11.71	10.06	12.9	6.35	11.37	6.36	9.93	5.63	14.13	20.32	10.66	6.34	5.79	8.37	5.61	8.78	3.81	10.06	7.31	1.98	5.53	8.03	14.77	7.36	5.2	8.03	12.12	11.61	19.53	10.75	13.57	11.4	13.82	6.45	9.3	12.29	19.4	9.85	11.6
ENSG00000115289	25.38	22.83	33.6	32.68	11.86	42.17	31.67	37.61	24.68	35.26	39.21	40.14	31.42	45.75	30.49	31.85	31.34	27.21	33.56	50.25	33.7	25.39	36.33	34.77	38.62	55.21	46.28	38.6	45.94	47.62	29.15	37.2	73.46	32.95	44.33	30.95	46.49	39.39	29.64	39.78	32.79	49.82	32.79	36.67	51.16	32.51	49.75	44.01	51.09
ENSG00000115325	6.7	16.55	21.01	11.54	13.31	9.85	8.99	4.95	6.59	11.9	9.02	5.84	14.91	10.76	15.04	4.18	10.31	17.42	8.28	5.41	8.16	4.1	1.39	8.12	6.33	1.89	9.87	8.14	8.67	3.36	11.62	6.78	5.31	16.68	5.92	5	6.21	11.59	15.32	6.41	12.2	5.99	17.28	2.32	12.95	11.88	19.15	6.85	10.85
ENSG00000115361	1.36	6.07	6.07	7.01	2.53	4.49	6.65	2.31	4.21	1.52	1.75	1.35	0.6	0.4	2.88	0	0.96	2.95	1.59	1.31	1.8	1	2.11	0.55	1	1.15	0	0.66	0.48	0.74	1.52	3.2	0.46	1.93	3.78	1.21	1.98	1.13	4.26	2.22	4.74	1.15	6.99	0	0.39	1.11	1.72	0.42	5.06
ENSG00000115457	228.75	83.12	233.75	230.96	133.51	143.26	206.41	127.23	54.38	101.41	93.37	60.9	66.14	139.38	86.61	73.27	69.21	32.35	79.86	40.01	64.69	67.52	44.64	32.7	52.52	191.89	103.32	46.55	106.07	49.17	73.8	86.86	150.92	323.5	70.51	98.1	94.73	87.76	58.52	70.83	59.18	161.26	82.64	30.88	74.19	44.6	20.98	81.08	60.45
ENSG00000115461	12.82	90.98	60.66	39.4	104.6	12.32	39.35	13.45	43.5	39.26	14.65	19.16	24.57	27.64	39.13	25.83	88.25	40.06	66.91	33.44	39.94	26.07	21.44	9.56	28.68	23.42	21.77	8.63	68.9	19.39	59.31	12.63	6.03	103.76	17.61	19.43	22.51	8.19	104.83	40.41	38.78	9.46	49.04	20.48	13.72	35.51	20.67	33.28	8.84
ENSG00000115486	25.54	19.04	31.77	37.38	15.58	23.46	25.83	22.73	18.95	25.46	22.92	23.68	20.52	21.96	23.38	25.4	21.41	16.72	22.41	24.57	20.25	23.27	24.24	22.35	22.38	16.54	22.19	16.89	27.04	20.35	23.13	19.37	20	33.29	30.09	15.24	17.23	22.38	19.87	23.45	18.91	19.82	32.7	25.05	30.43	25.54	22.98	21.11	13.25
ENSG00000115541	334.56	154.92	252.86	2315.45	54.96	413.07	252.53	226.3	144.52	152.42	184.06	240.96	390.76	177.06	209.3	264.04	150.36	174.44	207.91	188.68	187.41	153.56	196.49	289.33	171.37	263.78	180.81	312.43	280.39	309.84	243.86	202.67	300.09	126.36	249.43	327.64	226.4	232.19	191.2	185.63	271.83	174.07	290.08	152.02	219.68	342.25	609.18	189.26	312.36
ENSG00000115616	0	1.67	0.59	2.05	1.55	0.24	1.85	2.03	3.5	0.74	1.5	0.66	1.18	0.19	1.17	1.24	1.88	0.72	3.36	2.09	0.88	2.27	2.06	1.61	1.8	0.84	0	0.97	0.23	0.9	2.23	0.89	0.9	2.35	0.55	0.99	0.97	1.37	3.03	1.09	3.18	2.24	7.23	1.38	0.96	2.17	0.21	0.81	0.49
ENSG00000172232	21.37	22.1	14.67	6.62	3	12.56	6.73	6.55	3.32	3	8.97	4.26	5.7	1.25	5.3	4	1.52	2.32	9.16	11.39	2.13	3.66	4.65	5.18	1.58	2.72	0	7.27	2.26	0	1.2	5.04	5.08	0	8.94	2.55	6.88	11.53	4.88	2.33	1.87	3.01	5.18	0	7.43	2.62	3.39	1.97	7.98
ENSG00000115758	130.53	112.74	223.75	282.19	106.46	91.23	78.33	69.92	62.99	78.74	56.85	68.82	106.3	89.5	75.15	66.34	88.15	74.4	74.98	47.43	64.99	51.92	61.55	72.51	86.18	78.57	79.77	83.81	102.81	102.18	75.66	56.58	73.63	85.76	68.94	67.13	60.02	141.27	70.27	63.99	68.24	64.79	78.81	46	53.7	80.12	97.7	64.01	90.53
ENSG00000115816	36.84	26.87	6.22	45.61	8.11	31.2	32.15	28.21	31.02	8.83	24.32	28.6	34.21	9.36	12.87	28.83	7.4	24.21	29.57	25.35	26.59	26.01	28.37	28.91	12.9	17.43	5.7	25.69	9.42	25.96	14.41	26.82	32.65	7.97	31.44	29.32	33.91	27.71	35.25	27.71	30.8	31.04	33.84	28.84	28.63	38.67	36.62	25.23	31.91
ENSG00000115841	1.88	1.31	0	2.58	0.44	2.07	2.96	3.2	1.46	0.53	3.03	2.1	1.67	0	0.33	2.76	1	1.02	0.73	3.18	2.8	2.99	5.25	2.27	2.31	2.78	0.69	2.28	1.66	2.56	0.79	4.11	3.5	0.67	3.93	3.36	3.29	4.28	1.88	1.02	3.28	3.18	3.13	5.85	1.9	2.3	2.38	3.17	2.1
ENSG00000115844	23.73	19.22	352.81	21.42	5.74	4.81	6.3	5.58	7.63	4.13	2.64	3.26	8.01	7.65	12.76	4.81	6.39	13.65	3.83	4.36	2.72	3.21	4.58	1.32	2.02	5.55	2.41	6.36	2.31	2.24	2.76	3.31	2.78	6.4	1.37	2.44	4.31	2.72	5.14	4.47	7.15	2.31	3.47	3.4	1.9	6.03	2.6	2.51	2.44
ENSG00000115902	84.38	105.32	110.68	72.66	182.35	112.42	156.13	97.07	50.55	72.66	73.5	50.31	98.56	127.15	81.69	80.54	85.61	117.5	42.89	91.25	58.02	69.35	70.68	132.71	98.05	60.06	113.11	54.91	135.06	91.37	93.58	57.4	48.62	131.23	72.32	55.77	93.48	78.19	89.56	74.5	100.08	50.17	53.46	131.46	70.74	74.6	102.87	65.65	29.26
ENSG00000115942	13.97	10.94	4.73	9.95	3.7	3.42	13.37	6.99	8.97	6.01	9.63	8.59	6.63	2.72	5.28	6.72	9.26	9.8	13.08	13.31	12.06	7.3	10.71	6.77	7.12	7.51	3.43	11.32	1.97	7.63	7.59	7.54	11.39	7.29	10.14	11.68	7.91	8.89	13.31	5.85	8.55	13.93	11.3	3.87	11.07	6.1	8.58	11.72	6.96
ENSG00000115956	0	3	72.83	10.57	0.72	3.38	0.54	2.09	5.24	2.15	2.48	1.15	9.56	0.9	4.89	2.05	4.36	2.78	2.99	0.74	2.04	3.38	1.91	0	1.13	1.95	1.69	2.98	3.79	0.84	5.17	2.59	1.56	9.82	3.42	2.75	1.35	11.46	17.53	3.35	3.35	4.76	7.44	0	2.67	2.51	9.74	1.88	2.29
ENSG00000116062	47.5	27.64	29.52	37.33	18.16	18.57	26	21.34	17.44	13.92	17.02	21.62	21.13	9.2	8.72	16.04	11.65	23.18	16.67	20.5	14.76	17.12	17.17	19.89	14.79	17.03	8.26	16.78	6.4	16.16	14.68	17.47	17.89	7.98	20	19.2	22.62	16.13	22.83	14.39	19.43	22.3	25.79	23.32	24.53	18.73	22.9	15.76	14.83
ENSG00000116095	25.04	16	9.08	28.96	7.1	13.81	15.65	14.63	26.67	9.53	15.02	19.16	19.9	7.31	13.31	23.9	17.15	22.06	20.92	16.9	20.19	24.08	25.56	19.51	19.84	12.14	11.85	20.86	7.57	25.41	20.11	22.31	22.48	11.45	19.97	21.36	19.89	14.85	16.87	15.15	24.23	15.65	20.07	33.44	15.03	16.84	23.29	24.15	18.7
ENSG00000116096	10.05	12.18	18.01	25.39	14.09	13.55	10.56	5.71	11.45	15.03	11.91	15.03	23.86	24.46	30.87	10.75	20.23	29.17	22.21	32.47	10.01	10.67	12.49	33.85	43.78	27	19.73	27.68	30.75	21.05	17.89	24.86	37.57	34.55	24.31	25.01	39.23	36.17	22.98	21.05	16.11	11.35	27.44	13.92	40.79	28.8	98.96	12.34	22.53
ENSG00000074800	465.4	596.94	1752.16	1036.83	814.63	953.5	954.55	915.97	677.1	1030.97	999.61	852.42	1821.29	1890.62	1334.13	1103.86	1275.98	1275.47	1175.21	986.45	1012.4	781.76	837.08	1555.2	1297.53	1073.33	1524.89	1468.13	2040.21	1373.65	1387.89	1039.87	1107.46	1653.94	1240.95	1046.95	1271	1764.97	1336.96	1036.99	1697.84	718.48	1056.93	1059.31	968.92	1339.65	1129.96	933.46	1420.03
ENSG00000097046	25.58	17.05	5.87	16.6	6.44	12.29	20.66	28.17	18.95	4.14	17.48	22.3	17.07	2.87	9.06	17.09	7.34	10.35	16.11	16.2	14.69	16.38	15.59	18.68	10.91	13.77	4.71	16.73	2.78	10.48	7.19	14.26	14.03	1.75	15.1	17.62	15.55	12.25	13.21	18.81	14.19	26.93	15.81	6.13	13.4	18.52	6.87	16.9	13.23
ENSG00000116128	52.07	37.34	39.99	32.62	41.78	19.97	27.61	18.26	24.38	18.09	19.26	18.8	19.31	18.84	19.79	15.93	19.29	21.9	15.15	18.46	15.28	16.9	14.65	16.62	16.28	12	16.8	13.2	18.51	12.99	16.97	13.61	13.71	17.3	14.53	17.34	16.56	14.57	27.82	14.22	24.9	22.89	14.87	18.03	15.75	20.23	17.25	18.64	13.25
ENSG00000116209	200.25	201.17	248.1	256.43	127.74	353.63	285.05	257.17	184.29	222.23	231.37	296.05	294.29	205.26	204.91	277.13	241.36	225.43	186.62	246.36	265.89	231.48	257.6	306.15	284.68	280.46	226.87	318.96	240.43	338.62	297.95	313.18	300.87	216.8	327.84	393.32	254.82	347.68	262.13	239.68	281.04	222.75	380.46	217.48	228.29	268.6	344.05	230.46	289.21
ENSG00000116251	189.91	88.69	154.53	123.63	16.58	62.89	43.83	39.84	54.46	56.17	33.71	37.44	52	20.72	73.94	46.85	53.36	62.07	96.02	44.49	51.26	41.89	50.57	77.57	33.95	69.02	38.4	70.98	69.23	49.02	53.96	97.09	65.22	35.61	60.56	115.85	43.97	84.9	35.78	36.48	80.25	62.42	88.6	60.69	60.48	71.73	82.17	32.02	137.17
ENSG00000116329	0.72	2.02	0.86	1.99	2.36	0.53	0	1.48	6.28	7.28	3.26	5.04	2.57	6.74	10.23	3.47	6.66	2.09	3.38	4.55	3.83	3.53	3.14	1.17	4.98	4.28	4.25	1.4	5.6	1.97	8.11	4.38	1.96	1.54	0.4	5.6	2.11	0	3.71	3.55	4.42	2.85	5.25	11.99	10.46	2.36	1.83	4.43	1.08
ENSG00000116455	14.91	17.12	18.75	25.95	13.94	34.04	29.67	33.71	31.7	22.88	13.18	19.16	23.75	22.92	21.14	23.07	27.87	21.64	22.65	19.01	23.45	19.21	18.04	16.49	20.51	19.3	25.42	24.41	21.6	18.87	19.85	10.05	18.66	17.3	21.46	14.52	20.21	18.9	14.35	23.16	21.95	21.26	16.18	16.3	15.92	23.77	15.45	21.19	28.14
ENSG00000116667	33.1	30.85	27.67	57.76	15.47	48.66	37.08	57.17	56.21	33.41	39.92	47.28	41.24	19.33	57.86	60.15	40.75	65.63	53.35	33.14	48.35	58.34	56.21	35.66	32.63	29.94	19.49	36.46	38.93	27.73	32.25	20.83	32.98	42.36	35.71	27.66	24.54	27.48	46.66	39.78	40.5	33.63	33.46	27.5	46.05	77.65	63.06	39.27	49.45
ENSG00000116704	3.78	4.23	6.77	7.81	2.12	5.56	4.24	5.16	5.64	5.51	4.4	4.9	2.02	0	9.65	5.25	2.69	5.49	2.36	6.59	1	4.07	3.76	7.33	4.1	3.21	0.56	2.2	2.13	0.83	2.98	4.08	1.54	1.61	2.95	4.97	1.77	3.77	4.32	4.54	1.98	2.13	3.67	12.57	3.94	4.33	4.8	3.25	4.52
ENSG00000116731	42.55	40.04	22.53	29.09	59.8	34.46	37.88	50.35	65.94	42.58	54.46	58.09	39.15	48.29	39.71	55.44	61.35	46.13	52.21	46.21	59.8	76.26	71.23	30.75	71.08	46.3	52.58	31.83	37.28	54.3	54.78	37.57	36.65	43.72	40.77	56.84	43.51	23.86	40.65	56.4	27.64	63.34	32.23	89.39	47.65	51.25	27.33	59.02	26.14
ENSG00000116741	53.34	31.24	10.62	72.61	18.99	77.47	73.79	48.48	56.8	22.78	45.94	60.12	30.51	21.51	26.1	59.05	29.76	44.22	65.36	28.92	84.31	34.2	41.03	29.76	40.06	115.23	27.1	59.24	39.43	51.33	83.51	86.48	64.7	33.4	32.6	43.21	42.36	22.14	29.03	49.26	35.51	44.44	136.31	47.48	58.15	59.24	111.29	31.95	49.32
ENSG00000116874	2.98	5	10.69	3.6	4.18	5.48	10.96	7.12	11.12	8.78	7.23	6.32	5.31	3.48	5.28	9.57	3.18	9.74	11.63	7.23	9.41	6.21	4.63	6.63	5.88	5.69	4.94	9.42	7.37	7.74	6.29	5.53	9.63	4.24	9.16	6.68	10.48	5.57	6.39	5.3	6.52	8.42	5.88	9.29	8.65	7.32	2.84	5.49	8.91
ENSG00000116981	1.46	2.04	2.18	6.03	3.41	3.22	1.02	1.99	4.53	4.91	3.3	2.18	5.84	3.83	4.65	1.56	2.59	3.18	3.98	2.83	2.42	1.79	5.89	1.77	5.04	3.09	3.76	3.55	4.63	3.19	2.05	0.98	1.98	4.67	2.85	4.35	2.99	3.63	4.59	1.99	6.38	5.76	3.1	6.06	2.11	4.78	1.85	3.58	1.09
ENSG00000053371	30.66	35.96	74.58	39.67	57.31	72.01	82.2	50.47	43.67	63.32	43.97	40.62	77.2	106.12	72.6	57.56	70.11	59.67	39.66	64.13	55.11	30.39	30.66	67.07	51.98	65.32	75.4	95.93	91.31	74.76	87.84	71.6	55.88	86.66	65.52	50.89	74.84	96.85	68.81	44.53	96.07	44.32	73.47	80.78	59.38	79.56	66.49	46.35	91.6
ENSG00000117385	23.22	14.63	40.94	26.92	6.37	11.92	22.71	12.82	8.93	9.3	15.72	11.02	10.17	4.95	11.23	8.67	9.42	9.36	12.94	14.64	10.52	8.3	7.79	16.38	4.36	11.25	5.7	11.11	7.54	4.83	8.91	12.43	12.77	10.22	11.93	7.92	10.36	20.5	11.59	8.86	10.95	14.77	16.1	4.59	12.18	6.94	11	11.99	14.32
ENSG00000117395	78.74	84.05	68.39	75.61	52.4	90.32	81.85	116.3	90.42	105.69	96.34	117.71	91.3	85.69	99.76	127.53	99.98	83.08	100.48	88.43	138.6	83.52	104.51	80.01	124.68	139.62	118.52	122.89	107.77	121.87	94.54	142.37	139.4	72.09	144.47	141	112.41	130.74	60.68	114.06	75.07	105.71	120.82	89.21	99.57	112.28	52.28	111.27	114.05
ENSG00000117479	11.35	11.49	5.17	13.03	5.05	8.34	10.98	9.58	7.72	4.55	6.64	4.85	12.51	3.47	4.6	5.49	5.76	6.27	9.7	9.17	6.1	6.62	8.73	10.48	4.53	7.34	1.19	6.83	4.58	6.79	6.68	6.56	8.81	2.69	6.34	6.13	6.96	3.14	11.74	7.09	7.56	4.88	7.54	20.21	5.33	5.75	6.87	4.31	6.46
ENSG00000117533	0	4.24	0	3.92	6.2	5.57	6.64	5.17	5.89	5.32	1.22	0.94	6.75	2.21	2.69	5.07	4.04	6.88	5.91	6.43	7.55	4.64	7.07	1.53	5.61	0	0	3.68	2.68	5.18	2.13	6.39	9.02	4.04	6.35	5.66	12.21	4.72	10.83	6.21	11.6	5.35	5.75	7.88	3.3	4.65	8.43	5.82	5.66
ENSG00000117614	72.73	49.23	44.95	110.74	15.5	74.09	54.49	66.98	57.87	29.33	51.11	66.12	71.53	25.33	20.8	66.83	39.87	56.46	71.64	55.01	58.45	52.47	47.56	75.26	37.74	37.87	25.35	65.72	29.72	87.13	39.44	91.19	55.48	31.75	72.63	67.78	59.74	91.1	63.44	55.76	71.37	48.25	102.91	37.1	59.16	78.31	83.46	68.9	102.92
ENSG00000118160	44.13	98.3	34.26	22.29	202.78	78.94	53.04	98.79	180.96	210.75	214.8	153.58	75.28	195.45	142.3	154.51	245.01	89.64	121.03	104.77	172.38	167.1	161.78	46.36	165.35	113.53	158.07	45.03	204.02	84.79	177.36	78.36	37.48	181.46	82.92	105.82	71.89	26.26	114.76	236.29	67.5	150.69	58.88	146.68	78.02	115.58	68.2	207.63	47.25
ENSG00000118200	70.29	53.75	10.36	37.84	47.78	21.12	40.1	37.57	58.15	17.02	29.53	33.13	35.53	18.68	19.33	42.78	26.56	44.3	39.73	47.36	37.91	62.37	62.86	30.8	39.64	21.76	14.23	24.93	15.17	44.42	29.96	35.33	29.09	19.01	43.26	37.32	30.88	18.6	56.17	25.96	35.53	48.44	30.13	56.3	37.07	43.18	28.46	38.8	19.7
ENSG00000114942	364.51	263.1	348.56	344.65	62.34	191.76	153.46	177.03	146.53	156.29	103.13	155.52	151.59	128.7	141.82	154.72	140.44	175.42	157.92	100.42	157.38	142.89	94.73	113.58	142.11	163.66	132.38	163.23	174.87	169.84	166.71	186.34	196.65	135.5	174.84	183.45	130.37	229.45	115.05	132.11	158.25	122.36	221.79	138.57	154.66	187.17	168.7	117.69	250.9
ENSG00000138363	58.56	55.08	63.44	55.35	65.97	84.76	75.33	76.14	48.23	67.2	66.29	67.19	78.38	82.98	70.13	78.14	61.58	66.85	65.14	79.18	79.27	62.68	74.18	93.91	66.92	72	97.89	96.62	79.14	91.76	76.04	94.89	105.17	77.46	87.66	79.94	78.38	82.17	48.26	80.36	73.4	69.44	67.73	86.76	79.73	65.76	77.56	61.84	90.88
ENSG00000118246	17.43	12.18	8.46	16.13	8.14	14.81	19.83	14.11	15.9	11.91	16.54	16.55	16.96	7.95	11.58	22.12	12.76	20.54	19.11	20.84	20.25	18.13	20.3	19.8	16.11	13.39	7.21	11.64	6.15	15.77	11.02	12.48	21.83	5.81	23.71	17.55	20.08	12.66	28.01	16.36	17.13	19.67	18.17	22.63	20.2	12.03	14.18	14.37	15.46
ENSG00000118407	0.67	11.04	1.32	2.75	12.75	11.57	7.45	16.78	13.64	5.35	10.17	9.06	4.93	2.85	2.36	6.76	3.31	15.12	7.61	9.13	5.3	10.21	7.44	2.69	2.95	6.02	1.8	2.37	2.5	3.51	3.37	3.59	1.21	3.31	4.58	8.21	5.19	1.47	10.65	8.36	5.43	4.13	6.99	6.45	11.57	5.44	3.66	8.57	4.64
ENSG00000118473	46.02	49.54	7.29	45.72	38.32	40.73	36.16	51	77.4	37.04	48.13	50.85	42.34	24.68	30.83	59.9	45.35	54.5	57.61	48.68	47.18	88.74	74.88	25.29	48.46	35.57	32.02	38.64	23.64	45.49	39.94	36.73	27.01	31.38	49.79	47.09	42.14	19.49	62.26	47.03	51.98	57.07	47.84	85.83	34.66	42.01	36.78	56.47	38.81
ENSG00000028839	64.7	18.71	17.32	76.84	4.17	45.92	45.3	51.71	31.88	33.78	34.59	38.91	41.69	29.97	30.04	45.31	47.54	45.32	27.84	30.26	48.88	44.79	34.65	39.66	28.6	51.09	24.63	52.04	37.79	65.81	56.43	64.68	42.44	20.62	49.8	55.93	45.7	38.9	25.5	48.76	23.4	54.14	36.53	74.15	69.83	40.17	89.26	64.35	43.33
ENSG00000118496	31.76	20.99	6.47	16.9	9.44	7.16	9.35	3.94	6.73	3.64	4.9	3.78	11.88	1.48	3.84	5.02	5.89	7.07	5.91	7.87	3.35	5.83	5.38	7	3.2	2.14	1.33	7.72	2.55	4.53	2.64	1.95	3.19	5.13	1.81	4.09	4.44	3.89	11.96	3.15	7.57	5.7	8.32	11.99	3.35	7.97	13.75	5.31	4.31
ENSG00000118503	3.74	3.43	123.37	10.78	1.43	3	5.72	2.32	2.54	1.34	1.32	0.68	1.82	1.19	2.41	0.91	1.93	1.23	6.1	1.65	2.71	1.5	1.06	3.85	0.5	1.15	0.5	0.99	7.93	0.37	12.82	2.29	1.62	7.26	1.33	2.44	1.2	44.08	5.45	0.93	3.27	0	9.08	1.41	1.78	2.79	7.56	0.84	3.05
ENSG00000118579	23.82	15.99	54.06	24.62	11.13	26.27	26.69	22.74	20.72	40.08	24.63	35.62	27.56	23.65	27.01	19.1	33.84	12.1	33.44	24.24	33.22	27.99	35.52	23.1	24.66	28.29	22.79	43.99	20.18	24.73	36.15	24.1	25.9	33.88	26.59	15.64	29.28	19.78	27.23	19.52	29.15	21.51	31.79	19.8	24.86	54.59	31.77	23.39	21.35
ENSG00000115423	1.1	0.94	0.27	1.52	0.24	1.19	1.54	1.15	1.37	0.44	1.84	1.48	1.9	0.3	0.37	2.8	0.41	1.08	2.12	2.7	1.33	2.92	2.45	2.2	0.64	1.26	0.48	2.14	0.18	0.92	0.69	3.62	1.23	0.46	3.11	1.89	2.61	2.1	1.74	2.55	0.79	1.06	2.59	2.15	4.31	1.64	1.97	2.62	1.45
ENSG00000239305	69.85	77.68	36.32	90.83	39.24	80.77	84.63	78.66	48.52	39.83	63.13	64.14	70.2	33.69	41.99	59.78	50.73	66.9	60.9	61.6	51.33	57.64	67.78	63.74	62.1	52.58	38.12	67.89	35.18	70.32	60.44	55.57	70.39	31.25	76	71.45	63.16	68.1	59.21	48.45	66.54	65.56	62.83	53.8	68.24	68.41	88.72	50.57	53.93
ENSG00000118680	434.17	487.27	361.49	692.5	158.52	661.15	482.65	669.41	417.65	488.62	426.28	576.94	517.92	353.52	309.88	614.67	489.6	393.97	650.47	390.53	598.18	437.33	444.74	425	431.12	468.5	319.52	558.04	396.48	594.22	520.4	551.9	465.17	282.12	560.15	470.02	349.73	582.68	421.55	522	386.25	339.01	748.4	368.5	512.33	524.69	474.36	407.74	532.34
ENSG00000149639	44.15	32.46	42.63	8.54	52.14	10.36	12.1	14.09	20.43	24.54	7.16	22.94	6.85	15.58	13.18	6.13	16.28	11.45	6.3	13.56	6.74	9.75	8.52	5.31	9.35	3.66	5.67	2.92	10.61	4.52	13.3	3.55	2.68	10.42	3.98	7.51	6.16	4.37	11.81	6.98	11.33	9.75	9.68	20.29	4.79	15.37	7.99	6.46	3.93
ENSG00000118762	36.68	18.56	17.11	26.95	4.24	11.04	30.57	21.19	21.05	6.46	19.64	17.58	24.25	1.02	9.16	12.88	7.69	19.26	25.88	25.39	14.15	16.59	16.06	14.96	5.85	9.48	3.09	21.05	4.44	6.87	9.82	10.6	14	6.21	17.35	18.14	17.79	19.14	24.96	11.07	14.65	19.12	26.69	18.87	17.41	21.16	19.97	13.72	13.57
ENSG00000118777	6.98	6.43	20.34	2.83	7.67	47.96	48.27	27.98	51.5	34.52	17.76	42.13	30.31	22.77	51.18	31.81	47.8	32.15	69.77	35.79	57.49	19.69	28.81	33.16	26.3	14.97	10.57	49.45	15.06	26.23	30.45	27.12	30.95	25.97	30.46	37.24	25.22	13.97	19.47	35.42	87.87	30.8	148.83	10.23	36.63	53.74	42.48	16.87	158.17
ENSG00000118804	3.75	19.29	11.2	11.36	5.96	7.72	11.03	4.6	15.84	9.67	8.72	10.09	15.35	14.45	18.6	19.64	18.64	19.58	27.49	17.44	27.38	19.09	27.95	18.18	34.38	21.62	23.73	17.49	19.05	23.76	23.6	26.8	12.74	15.99	26.37	15.22	19.31	19.92	18.43	23.76	12.45	4.23	14.55	15.58	22.17	14.73	15.24	12.88	14.56
ENSG00000118816	1049.8	857.39	761.72	459.22	500.51	392.63	273.25	371.92	538.05	447.66	385.6	415.59	472.17	254.96	714.15	444.25	332.32	731.06	367.68	329.17	376.85	425.07	397.36	528.28	459.23	469.31	720.17	657.53	322.7	522.52	303.42	451.88	764.48	392.92	408.19	527.59	430.17	299.79	297.54	337.74	627.43	777.79	408.61	574.02	520.56	424.32	350.08	364.05	1024.54
ENSG00000118985	11.34	10.33	31.85	26.04	2.55	10.5	8.82	14.89	18.53	11.77	16.01	32.65	17.19	8.58	10.71	20.65	14.32	22.55	19.98	21.57	15.89	25.5	32.36	24.43	21.74	24.93	7.73	16.73	11.26	21.34	21.95	17.84	15.98	8.96	24.38	27.83	16.71	23.01	43.2	14	11.01	35.08	19.87	27.92	19.96	12.72	24.54	13.14	7.53
ENSG00000119125	22.24	90.57	2.72	33	97.81	65.4	59.9	71.55	171.51	78.03	96.18	116.82	59.89	41.64	44.06	137.8	123.55	85.23	122.32	93.12	109.44	174.54	185.34	36.41	118.94	68.2	32.74	58.2	41.86	114.35	106.75	93.45	28.29	46.23	117.77	98.73	60.42	22.73	121.26	114.05	22.43	46.03	92.01	132.7	67.11	82.62	59.4	123.9	23
ENSG00000119147	10.84	3.03	6.47	13.69	8.44	10.62	15.18	4.93	5.61	3.04	7	10.8	14.47	10.55	12.8	17.38	10.27	3.93	19.73	18.38	17.99	12.38	1.12	5.84	19.6	7.66	15.96	14.05	28.05	8.88	17.26	40.2	27	24.41	11.09	8.63	15.86	18	9.29	9.87	7.9	12.24	48.21	7.51	12.57	1.48	14.92	4.43	16.19
ENSG00000119203	14.38	21.82	12.57	28.3	9.84	26.8	20.13	24.5	15.63	13.53	26.87	21.24	19.65	13.79	10.92	24.15	13.49	17.51	22.02	23.63	18.07	18.35	19.46	16.59	18.98	23.95	18.89	23.45	7.97	24.12	14.14	28.04	28.6	7.67	20.63	26.66	24.04	28.56	19.66	19.64	23.33	22.31	26.47	17.06	19.94	21.85	17.28	19.85	19.17
ENSG00000111364	26.88	28.8	21.93	40.73	4.6	20.41	36.07	31.45	20.32	12.06	23.73	16.07	18.74	7.32	19.68	24.42	16.22	23.72	32.14	18.01	27.06	21.93	23.38	26.06	16.34	18.23	8.24	27.86	8.54	17.13	13.09	33.53	28.3	11.15	17.75	25.67	17.04	34.96	22.02	20.07	25.06	24.78	29.61	24.19	25.96	22.73	28.73	18.97	25.43
ENSG00000119242	146.77	121.51	105.56	105.57	139.43	182.39	123.2	194.59	211.08	267.35	236.8	184.26	164.52	231.57	228.7	193.74	212.51	260	230.18	240.82	219.11	196.52	243.84	201.8	277.02	289.52	335.98	274.24	247.23	295.91	298.06	371.79	374.05	301.51	336.23	300.59	355.46	289.49	139.03	209.99	158.75	260.86	198.68	235.82	263.21	187.8	332.67	252.77	232.57
ENSG00000119431	29.91	20.31	48.48	33.85	27.46	49.47	46.37	45.88	43.8	31.15	48.31	43.65	34.22	66.76	49.21	31.41	37.94	30.22	38.32	55.9	48.23	29.29	32.52	57.83	45.82	45.3	47.96	58.14	70.87	50.77	45.03	38.18	74.03	46.33	45.91	30.61	26.89	78.94	38.46	39.1	48.55	39.79	40.82	17.75	61.92	48.96	51.56	32.78	49.47
ENSG00000119541	18.75	22.33	10.48	22.5	9.61	14.67	18.64	23.51	26.31	15.94	16.42	24.42	16.69	11.66	15.43	23.61	13.75	37.3	20.76	37.22	21.69	30.21	34.58	17.11	18.49	15.9	12.02	23.52	8.97	29.41	22.78	26.11	26.3	12.9	36.46	37.56	26.56	15.57	32.85	18.84	23.26	26.97	19.45	30.16	23.14	18.32	8.84	28.96	31.63
ENSG00000063761	25.17	19.53	7.06	12.74	24.01	30.97	31.65	32.57	27.13	27.94	29.21	29.95	32.46	26.4	23.67	24.44	22.99	17.89	25.64	19.41	24.22	20.88	21.39	13.7	23.05	35.73	31.38	25.46	26.47	17.12	23.39	19.05	39.09	22.28	26.38	19.93	28.87	9.81	16.74	30.59	20.21	23.49	21.5	23.48	24.42	14.72	11.75	29.32	25.33
ENSG00000119632	65.79	62.16	200.51	128.15	64.66	155.09	146.13	145.38	146.58	178.09	165.63	150.36	197.85	298.1	249.19	234.03	232.02	153.05	238.84	186.85	147.6	92.19	116.99	245.64	205.78	292.44	227.07	379.22	307.42	215.64	269.04	194.27	240.44	177.42	189.91	189.59	260.24	274.99	151.7	178.48	176.46	129.32	253.16	150.8	139.39	315.63	328.49	107.19	460.9
ENSG00000119638	24.74	23.96	44.14	23.78	9.68	19.87	34.64	23.14	20.73	19.03	24.9	22.93	29.43	6.72	22.22	19.06	16.95	25.87	26.92	36.37	22.72	24.22	19.48	38.35	13.04	14.39	8.68	25.44	14.01	12.41	22.31	19.39	19.15	21.88	22.15	21.8	26.77	22.45	37.31	19.17	32.18	22.89	32.97	19.12	34.68	28.25	39.27	27.71	26.64
ENSG00000119650	56.61	40.8	31.55	76.26	9.99	54.56	71.34	53.17	25.79	23.28	40.64	21.94	31.35	22.77	21.4	34.97	16.98	20.99	46.11	31.08	35.91	20.33	23.45	51.84	19.22	29.87	26.85	42.79	26.64	24.05	28.28	27.14	41.02	15.2	28.08	30.79	41.23	41.78	24.44	23.37	32.98	33.37	37.38	5.23	32.81	50.45	40.74	22.39	60.14
ENSG00000119669	154.03	118.99	195.06	124.26	106.7	60.33	47.3	43.75	69.88	100	72.24	48.65	39.08	91.53	63.43	52.72	58.54	67.63	54.79	52.04	43.95	43.33	43.02	69.33	54.45	70.18	70.1	55.15	66.04	49.45	67.97	52.84	31.9	73.49	29.6	51.21	55.95	49.64	52.32	62.37	56.09	51.09	46.09	71.57	37.59	53.35	59.21	73.58	43.39
ENSG00000119673	10.01	14.62	22.92	22.22	22.09	40.48	19.86	31.09	18.66	25.89	29.11	13.58	15.84	46.45	36.26	22.89	29.23	29.05	24.29	19.4	15.88	17.7	14.51	14.38	22.76	25	21.29	34.06	31.8	16.71	25.64	27.75	20.03	20.17	17.07	20.25	16.93	25.4	16.53	25.22	22.85	13.81	25.3	25.42	17.41	16.84	18.02	28.67	25.76
ENSG00000119686	0	0.92	6.89	1.14	1.28	2.83	2.31	1.87	1.71	1.85	0.71	1.1	1.47	0.32	1.95	0.59	1.95	0.8	3	0.8	1.1	1.88	0.68	0.89	1.08	0.47	0	0	1.16	0.6	1.24	1.11	0.37	3.91	1.53	0.98	0.97	5.48	4.71	2.4	2.88	2.17	6.34	0	1.59	1.35	1.4	1.35	2.46
ENSG00000119699	35.85	32.07	46.32	46.7	24.98	13.9	28.75	12.44	8.91	13.16	15.58	10.72	18.56	8.37	6.93	4.53	9.72	29.79	16.27	17.69	9.52	6.38	4.86	34.76	8.03	8.85	11.99	10.14	9.66	4.99	13.19	8.35	14.61	21.78	11.64	20.23	15.64	16.78	16.76	6.41	16.52	9.2	22.14	8.12	9.07	14.4	13.66	12	20.45
ENSG00000119714	12.89	22.42	5.56	25.15	34.13	15.79	14.54	17.08	23.58	17.26	12.03	13.91	7.65	18.82	4.57	14.16	5.59	9.87	7.82	7.63	10.93	12.62	9.79	4.05	20.82	10.32	11.07	11.83	11.12	12.91	15.69	7.72	3.4	12.73	12.39	5.98	16.34	7.13	7.37	13.3	4.38	4.45	9.55	5.95	8.72	3.52	26.83	20.21	5.35
ENSG00000115421	18.99	17.57	5.89	15.35	10.92	6.18	7.42	7.97	10.21	5.94	7.79	10.56	7.48	3.63	2.33	8.59	5.19	10.07	9.69	10.8	7.52	11.27	14.07	10.92	9	5.89	3.76	6.74	2.84	10.18	7.19	6.9	4.72	4.16	7.34	10.68	6.84	7.28	9.39	7.38	7.02	10.93	8.42	6.07	12.7	8.37	9.28	8.97	3.82
ENSG00000119778	10.96	4.12	2.82	3.78	2.03	1.11	3.97	1.8	3.17	0.53	1.22	1.32	2.69	0.11	2.14	2.32	1.21	2.88	2.36	2.11	1.13	1.57	1.53	4.58	0.75	0.8	0	2.02	0.4	0.83	1.27	1.91	0.9	0.54	1.58	1.24	1.99	1.41	3.56	1.24	2.81	2.03	2.52	3.14	0.99	2.17	1.56	1.39	1.13
ENSG00000119820	41.76	19.05	28.22	50.72	17.46	42.81	40	27.72	36.86	24.64	44.73	35.04	40.09	10.91	28.81	25.26	22.63	22.32	29.99	25.55	32.1	32.82	24.58	30.19	28.71	30.75	8.9	34.17	14.73	24.61	27.17	25.93	21.65	15.62	30.05	25.58	25.72	22.81	40.82	30.62	26.89	31.01	36.65	36.52	31.21	27.88	42.57	20.9	32.83
ENSG00000119862	56.99	63.73	21.12	60.92	24.79	39	28.89	50.91	64.7	34.16	30.47	32.31	24.48	5.74	27.85	42.01	30.7	27.08	42.91	26.66	44.36	36.56	35.41	9.53	29.06	30	13.02	28.65	18.03	36.5	24.3	27.82	16.02	20.96	26.32	38.71	19.55	17.95	28.08	32.21	30.91	32.16	35.75	40.82	30.75	33.77	41.18	30.15	14.68
ENSG00000119878	21.12	10.33	11.03	21.82	1.23	34.92	11.09	12.6	13.12	11.84	5.12	22.36	4.7	18.5	16.83	12.7	9.37	15.32	14.41	8.95	19.27	9.05	9.84	14.93	6.51	13.43	3.88	12.82	7.45	33.16	16.32	10.68	16.14	3.75	27.99	15.75	18.54	26.3	24.13	14.42	13.84	8.94	17.61	0	9.18	19.44	20.11	14.58	11.83
ENSG00000138111	23.67	35.93	19.79	15.38	35.08	21.38	24.15	35.97	27.74	40.58	27.97	30	22.27	30.42	22.53	31.09	28.34	16.19	17.41	31.46	33.23	26.83	30.68	21.32	21.67	26.39	33.35	30.9	34.37	27.71	28.13	28.73	27.57	33.66	27.18	26.24	41.96	25.83	20.49	31.41	19.51	30.54	21.74	16.86	46.66	16.05	30.07	40.68	27.28
ENSG00000119938	29.63	36.45	7.58	39.66	11.87	37.34	111.43	52.52	7.89	12.82	44.3	11.39	117.53	12.36	36	30.77	23.45	50.36	29.71	29.12	19.11	9.12	13.15	54.72	20.45	35.18	30.53	46.9	52.58	16.65	67.09	4	13.8	17.45	17.95	10.61	36.67	29.52	38.71	17.11	59.19	10.99	33.37	172.34	14.72	47.11	32.26	23.9	54.38
ENSG00000120129	103.15	63.4	160.33	90.21	27.69	225.85	348.8	181.04	87.72	121.83	120.05	84.58	139.97	123.47	249.88	144.29	334.08	153.37	443.85	146.73	571.65	66.26	126.36	102.85	97.01	394.58	330.03	121.57	451.25	87.52	466.68	336.4	92.94	878.45	109.82	80.35	72.79	293.36	128.77	104.71	173.27	123.86	1360.28	112.45	64.88	59.87	67.83	136.92	227.31
ENSG00000120137	44.19	43.63	11.23	30.44	23.72	17.28	17.11	24.36	36.22	13.18	16.4	22.02	10.88	8.79	11.99	27.14	16.03	17.05	18.33	13.21	14.98	34.06	26.87	11.4	13.9	13.56	6.23	12.79	5.97	20.54	15.85	8.88	5.75	8.69	17.32	12.35	8.8	4.68	20.42	19.52	6.57	18.04	18.82	31.25	11.44	18.47	7.76	16.15	4.21
ENSG00000120256	20.87	34	15.72	25.63	24.17	32.68	34.31	43.92	49.61	46.81	46.32	47.93	37.15	33.39	38.58	61.11	63.8	40.81	51.66	41.33	54.82	64.42	72.73	38.86	60.39	40.79	46.08	43.21	31.38	58.5	53.55	50.78	43.77	38.06	61.28	60.13	64.26	30.14	42.01	50.57	29.34	56.85	47.33	49.01	59.96	37.13	49.56	52.34	25.76
ENSG00000120318	12.77	16.81	35.66	14.75	5.51	12.56	22.42	10.58	13.18	10.24	14.09	7.93	12.41	4.47	11.83	8.82	7.81	7.98	11.95	13.13	13.3	9.71	9.89	14.92	4.94	9.66	2.46	12.03	6.66	5.04	8.61	26.1	10.28	12.71	13.05	8.21	9.54	31.48	21.22	10.95	11.33	7.54	35.27	4.9	10.7	6.91	10.73	12.18	10.57
ENSG00000120322	3.69	1.88	2.21	0.92	1.41	3.95	1.65	0.92	1.46	0.56	0.65	2.68	2.09	0.2	1.19	0.72	1.43	0.97	0	1.14	1.11	0.16	0.83	1.08	2.32	0.57	0	0.33	0.95	0.37	0.38	0.45	0.46	1.91	0.37	1.2	0	3.62	0.58	0.55	2.93	2.08	1.02	1.39	0.19	0.27	0.43	3.09	0
ENSG00000120327	35.04	28.07	14.49	18.34	11.02	22.04	29.72	24.81	15.91	11.71	21.55	18.3	19.79	17.51	11.22	22.69	16.75	14.42	17.08	14.85	28.41	19.3	17.38	20.96	17.11	13.14	9.67	17.03	11.41	18.22	13.82	14.09	18.54	16.05	23.5	16.09	15.78	15.67	15.6	25.03	20.61	18.26	19.21	9.8	10.94	14.89	16.69	22.74	12.08
ENSG00000120328	7.78	8.32	8.48	1.86	3.79	4.47	3.08	1.38	6.3	3.79	4.15	3.2	3.31	2.77	3.6	3.8	4.8	1.96	3.43	4.1	2.92	3.15	2.73	4.65	3	2.87	2.24	0.66	1.67	4.25	4.56	3.88	3.22	4.81	2.45	2.62	2.77	3.09	2.51	2.77	4.73	3.82	4.72	2.81	1.18	1.94	1.93	1.66	2.02
ENSG00000116132	0	1.22	17.65	12.82	1.02	3.22	12.26	5.22	4.08	3.68	3.54	7.09	12.66	1.28	6.98	5.26	4.66	9.53	11.95	13.25	7.27	8.57	4.76	13.26	6.47	5.57	4.83	6.38	8.5	4.78	7.38	2.95	1.49	7	1.22	6.53	11.53	7.27	13.76	4.19	26.78	3.09	6.64	22.73	8.88	15.23	5.56	6.72	6.54
ENSG00000120332	1.04	1.39	0	1.28	1.26	1.52	0.43	0.56	0.77	0.81	1.2	1.34	0.37	1.45	0.15	1.55	0.74	0.6	0.32	0.2	0.69	1.83	1.8	0.33	0.82	0.35	0.3	0.6	1.32	0	1.28	0.14	0	1.33	0.69	1.11	0.61	0.17	0.12	0.68	0.36	0.12	2.01	0	1.32	0.17	0.26	5.59	0
ENSG00000120509	14.32	27.22	20.52	19.73	26.76	40	50.13	25.38	21.35	30.51	11.1	25.69	15.29	50.18	28.41	22.96	30.51	20.78	17.87	20.81	45.63	33.65	28.47	30.08	21.18	38.86	48.48	19.48	48.51	26.6	25.76	25.1	21.4	32.58	31.97	27.35	28.5	9.51	22.91	23.47	22.53	33.94	27.79	35.7	36.52	35.16	52.75	28.12	42.78
ENSG00000120526	15.4	11.94	12.16	18.13	3.48	13.87	16.69	27.43	14.2	5.57	13.16	17.08	15.47	4.93	7.39	13.54	7.41	6.49	9.68	13.48	9.23	18.97	11.42	11.64	6.37	7.58	2.56	8.21	5.61	12.48	12	13.06	9.45	3.18	12.47	10.38	10.76	14.85	15.9	8.14	6.51	10.65	16.87	16.51	12.67	11.38	9.46	13.72	8.9
ENSG00000120690	2.17	4.61	4.93	6.28	1.83	8.62	13.38	5.03	4.59	2.43	4.77	6.06	10.05	1.01	8.31	1.62	3.7	9.76	6.43	5.05	3.46	3.19	1.35	8.42	3	2.21	0.64	5.06	2.76	2.37	8.79	3.51	2.95	4.63	3.39	4.41	6.86	8.65	12.66	4.74	9.11	2.21	17.64	9.02	5.54	4.26	8	4.53	7.78
ENSG00000120697	29.82	24.09	24.24	34.24	10.45	29.84	31.9	25.98	15.95	17.19	20.34	26.42	42.75	14.03	11.74	24.79	28.24	18.03	23.9	23.28	15.95	17.44	21.62	15.39	16.33	30.91	12.8	25.76	13.45	22.63	22.35	31.28	30.39	8.83	32.82	35.11	29.57	47.45	27.46	23.53	25.34	20.1	26.63	3.44	19.69	26.44	20.52	15.76	37.12
ENSG00000120729	1.62	1.21	0.32	1.86	0.25	0	1.89	0.37	1.68	0.3	3.83	2.42	3.36	1.26	1.53	2.02	1.15	4.7	5.05	4.97	1.07	3.17	2.68	3.49	0.53	2.75	1.59	2.1	1.14	4.13	1.21	3.64	3.67	0.77	2.11	8.05	4.42	3.14	2.47	0.59	1.41	1.22	1.96	0	4.38	2.21	1.71	1.66	1.61
ENSG00000120738	35.96	25.56	151.42	112.11	126.74	205.21	262.88	157.49	349.91	339.72	145.32	273.07	63.46	501.56	153.77	433.31	174.03	107.89	214.86	53.16	352.88	249.49	202.61	40.39	267.13	871.55	847.83	160.53	581.62	231.76	692.72	50.14	135	462.82	63.95	130.99	157.68	75.91	54	360.65	130.52	489.53	572.98	546.98	71.02	211.51	39.48	317.55	176.65
ENSG00000120837	47.78	64.64	28.53	65.83	14.4	39.65	62.59	73.55	72.78	26.79	36.84	55.3	58.98	19.8	53.52	62.61	30.65	84.98	66.11	48.54	54.23	67.92	58.41	54.8	37.99	49.67	23.82	49.43	19.58	58.1	25.12	74.82	84.82	16.44	73.97	68.08	47.81	43.51	42.28	42.94	60.62	45.23	63.56	44.82	57.18	56.76	55.79	32.16	69.07
ENSG00000120860	27.26	43.83	19.33	43.43	8.76	76.4	36.98	68.53	33.87	30.57	53.94	38.21	39.42	24.88	25.36	62.84	33.88	32.14	53.15	37.97	33.94	47.55	31.76	63.33	31.92	76.59	32.6	67.89	40.89	41.89	51.71	62.04	63.67	18.17	55.15	60.01	34.9	43.85	28.24	38.17	47.65	36.54	49.6	21.24	49.38	39.04	55.19	43.91	68.72
ENSG00000104290	27.04	17.38	7.95	14.18	21.31	16.32	22.04	19.54	25.08	9.51	19.3	26.75	14.01	15.09	12.01	25.89	20.93	12.59	22.03	13.69	25.46	25.89	24.58	9.78	23.88	26.01	6.24	16.47	14.24	20.51	18.6	14.15	12.89	8.03	20.5	15.42	13.94	5.36	13.38	16.76	9.88	21.87	20.07	41.92	17.08	16.85	15.64	17.83	8.44
ENSG00000120875	38.85	9.15	10.18	20.66	12.1	2	11.93	5.11	26.25	8.41	3.96	5.43	1.21	13.13	15.46	12.02	6.78	6.43	13.82	1.98	13.57	8.68	8.05	0	8.74	9.83	14.04	10.6	11.06	16.38	16.09	0.92	4.17	9.69	0.38	11.8	12.37	2.83	1.17	17.5	17.87	15.77	9.09	8.49	0.79	18.41	0	13.38	9.16
ENSG00000120896	11.22	18.82	115.79	38.36	19.28	42.7	62.27	34.69	25.88	35.27	37.79	29.15	69.87	38.14	54.22	18.42	38.13	58.12	35.62	48.91	31.92	11.57	14.69	87.72	22.12	21.74	31.55	39.32	43.82	26.04	30.62	37.82	58.24	90.29	25.49	25.83	53.93	99.78	70.29	25.83	66.52	36.85	71.19	18.31	36.69	33.11	70.98	22.62	71.81
ENSG00000120948	149.2	140.38	132.49	166.24	53.96	87.74	135.35	113.66	117.68	73.47	96.4	124.46	104.49	44.7	94.7	118.24	116.1	125.65	147.21	106.23	105.95	134.03	136.63	141.52	86.02	98.48	62.54	152.56	44.87	110.92	102.09	104.54	104.01	62.26	122.73	117.72	113.14	83.48	166.46	102.42	122.46	130.34	121.17	110.5	141	122.11	143.78	124.6	101.75
ENSG00000121039	0	1.32	14.1	11.93	0.74	6.36	14.88	6.98	8.31	2.21	7.12	1.96	11.21	2.3	5.58	6.73	5.59	4	1.84	7.63	8.88	3.08	2.93	7.63	6.6	3.34	5.21	6.12	5.56	3.44	5.31	3.72	2.14	5.04	2.2	2.35	4.15	10.46	7.2	9.46	3.44	3.55	8.12	3.27	2.28	9.02	2.5	7.73	1.18
ENSG00000121058	29.39	20.87	13.93	17.68	7.85	14.4	18.29	15.27	16.81	8.11	10.85	20.46	14.95	5.72	14.88	16.46	12.92	16.92	18.19	17.41	11.46	19.65	20.87	16.96	12.88	12.27	10.3	14.06	5.27	17.59	12.06	16.67	19.02	10.61	17.71	13.37	14.47	10.07	18.93	16.06	12.64	19.22	20.09	31.01	14.06	11.46	18.37	14.03	11.85
ENSG00000121068	0.93	3.37	6.64	4.47	2.6	10.55	11.67	9.79	8.06	7.27	7.78	3.69	6.59	2.97	9.19	2.48	6.58	5.38	13.36	17.95	7.07	5.44	4.32	15.72	1.83	5.5	2.04	7.2	5.23	1.77	7.03	12.18	1.89	14.82	3.1	3.04	2.71	8.84	3.71	4.55	13.36	2.09	18.26	0	4.83	2.65	4.71	5.97	20.75
ENSG00000121083	251.66	376.33	335.51	338.65	601.62	326.94	307.31	474.79	698.11	702.25	514.23	659.1	421.85	933.07	875.09	638.14	735.7	573.14	634.4	394.12	606.13	724.95	716.32	331.02	926.1	719.68	1007.86	853.14	855	767.31	638.14	674.78	763.39	857.13	623.83	677.73	589.15	383.86	434.81	533.96	654.71	855.49	393.98	753.73	508.84	517.27	375.39	545.87	743.12
ENSG00000121101	1.43	0.34	0.49	1.12	0.1	0.15	0.43	0.42	0.38	0.23	0.53	0.3	0.36	0.12	0.14	0.22	0.43	1.18	0	0.79	0.27	0.4	0	0.49	0.3	0.35	0	0.59	0.14	0.33	0.46	1.1	0.28	0.29	0.23	0.85	0.24	0.85	0.35	0.22	0.53	0.35	0.12	0	0.24	0.33	0.26	0.13	0.61
ENSG00000121104	6.93	5.81	26.47	10.02	5.5	5.6	10.67	4.25	4.3	12.43	4.92	5.52	11.1	5.66	4.91	6.66	6.89	5.02	9.18	8.72	11.96	5.77	5.16	14.55	6.15	5.29	5.61	5.39	10.27	4.92	8.18	7.47	8.47	21.18	9.28	7.44	5.68	11.5	17.02	6.43	10.9	5.86	10.92	8.63	10.04	7.94	10.56	8.93	12.42
ENSG00000131127	7.37	4.44	0.68	2.73	3.44	0.83	2.78	3.48	5.63	2.54	2.93	2.26	3.03	0.33	2.01	3.64	1.21	3.29	3.54	2.75	1.51	4.44	2.11	1.37	1.12	0	0	3.3	1.2	0.93	0.64	2.29	1.54	0	1.58	3.38	1.66	1.88	5.18	1.86	3.47	1.6	3.44	0	0.66	2.32	1.8	4.17	1.69
ENSG00000121316	0.97	0.54	2.03	1.34	0.45	2.14	4.76	0.66	1.21	2.72	0.63	0.24	3.03	0.57	2.75	0.78	2.42	1.41	3.03	1.65	3.23	1.67	1.21	4.71	0.96	0.82	0.36	1.42	3.09	0.8	3	3.28	0.66	8.98	0.81	1.74	2.28	4.44	2.78	1.59	3.82	0.55	9.14	0	1.69	2.39	4.01	0.6	3.63
ENSG00000121350	3.76	3.31	0.32	4.81	2.01	2.76	3.39	4.03	3	1.81	4.86	3.21	2.87	0.63	1.14	3.73	3.43	2.34	2.51	5.21	2.85	2.89	3.67	3.04	0.53	2.28	0.4	3.66	1.9	3.23	1.21	3.62	4.75	0.76	4.8	3.85	3.14	4.02	3.99	4.99	6.57	3.03	2.93	6.7	3.11	3.08	1.71	2.97	3.21
ENSG00000121361	4.43	8.5	21.18	20.95	7.4	29.8	24.39	27.64	10.23	25.57	11.46	18.31	22.55	12.58	10.77	11.17	7.2	8.73	9.39	17.49	15.14	15.82	15.74	19.96	12.18	15.04	9.79	6.16	8.05	12.46	9.61	10.68	17.21	13.51	10.61	20.04	13.35	16.3	16.29	11.07	19.38	17.16	18.82	7.89	15.79	13.48	16.49	12.44	20.82
ENSG00000121579	43.44	49.48	35.55	60.96	22.55	33.11	40.55	31.81	62.97	21.65	34.3	46.5	37.22	17.85	19.38	53.32	22.85	52.52	50.19	44.43	57.68	71.68	62.97	36.4	36.48	32.75	26.05	45.34	31.79	56.25	36.17	55.32	34.98	32.03	35.91	58.58	40.49	32.06	68.04	51.86	47.81	55.39	61.47	106.94	27.98	48.72	48.02	41.46	43.26
ENSG00000121680	17.07	18.22	15.75	30.46	34.08	39.92	36.39	34.38	29.4	42.63	33.58	25.52	35.21	45.76	28.59	31.1	26.45	27.01	35.7	30.82	28.33	19.37	17.35	22.57	22.18	36.85	29.12	40.71	31.76	23.73	20.93	39.23	41.11	27.58	29.87	34.73	29.06	43.8	25.72	29.67	23.05	30.65	26.35	22.56	35.08	33.02	19.22	23.8	55.63
ENSG00000121691	21.92	17.96	30.75	23.53	13.58	38.23	39.98	28.5	15.84	12.58	23.39	20.83	46.73	9.83	23.85	18.26	15.93	24.41	22.66	22.97	17.94	11.48	6.97	44.49	10.81	11.24	8.26	29.24	13.67	13.37	13.76	8.59	11.78	14.86	14.23	13.39	18.5	16.09	34.38	15.88	32.08	10.65	30.61	16.95	15.07	28.79	32.38	14.08	22.09
ENSG00000121742	14.39	18.39	3.07	8.49	11.52	83.08	130.93	72.15	10.21	19.59	152.02	8.19	272.49	57.01	88.11	92.82	40.87	169.95	60.9	111.01	34.11	21.13	2.55	244.93	43.06	19.17	51.42	126.82	57.29	75.78	101.07	22.86	22.34	76.71	43.01	7.36	133.51	77.63	110.4	37.61	132.01	10.44	120.89	119.53	106.02	130.34	215.34	58.01	49.12
ENSG00000121858	0	1.6	2.28	5.92	1.78	11.23	9.36	13.02	9.49	6.96	1.23	9.04	4.25	6.69	21.65	12.76	18.98	10.39	32.01	17.11	26.62	12.62	5.93	6.94	7.53	2.43	4.92	11.13	3.37	9.91	6.44	12.87	5.84	7.47	6.93	11.4	11.17	3.96	14.19	12.52	85.1	10.78	77	3.97	7.19	35.16	7.88	9.96	42.78
ENSG00000121898	0	2.07	11.77	2.83	1.92	2.41	6.9	5.32	3.83	2.3	1.86	4.71	3.65	4.8	4.07	4.83	5.54	1.19	7.68	3.38	6	2.01	3.32	0.66	3.04	4.53	3.02	2	4.64	5.61	9.23	0.83	2.51	11.97	4.35	4.41	0.24	1.7	3.99	4.49	2.15	2.32	15.69	0	3.09	2.02	2.09	2.52	1.84
ENSG00000121989	48.19	52.72	10.95	35.36	22.03	18.48	23.84	29.28	26.36	9.69	24.03	27.14	10.72	9.18	8.17	20.44	10.04	13.3	19.2	12.18	13.21	25.13	23.76	8.04	14.72	11.55	6.55	17.31	4.81	11.44	10.89	12.01	10.67	5.59	13.74	10.63	14.41	9.57	20.35	19.74	15.56	13.89	19.69	13.06	18.22	12	13.97	22.18	5.48
ENSG00000122008	11.44	8.64	1.48	11.07	1.59	5	13.42	7.59	8.45	2.08	7.19	7.09	7.98	0.9	5.48	6.11	1.76	8.52	10.36	14.53	4.92	8.32	7.11	8.99	2.13	3.15	0.68	7.21	2.62	5.74	2.26	9.79	5.46	2.2	8.8	4.61	6.33	6.42	13.95	4.05	6.48	6.28	12.93	7.7	11.11	6.58	11.38	5.88	7.39
ENSG00000122035	6.65	4.34	3.97	29	5.18	14.66	26.37	12.08	18.58	22.36	11.45	21.53	17.75	24.59	21.2	24.87	24.39	11.25	23.33	8.59	24.27	10.31	6.19	8.06	17.48	13.15	14.68	8.61	33.62	9.08	41.1	8.22	13.55	33.08	11.75	19.18	12.32	14.72	10.76	24.82	25.17	20.63	54.42	9.21	9.63	14.51	4.92	6.8	26.48
ENSG00000122085	45.1	36.65	29.88	27.67	14.16	26.94	28.12	28.35	34.59	22.92	34.15	37.93	25.71	16.87	26.97	35.41	28.03	35.79	32.98	34.48	37.9	32.09	31.53	30.75	33.7	29.88	25.41	39.04	23.87	32.72	34.86	34.21	32.08	23.05	43.26	34.5	38.77	26.33	26.58	31.57	37.57	32.22	39.32	26.35	39.62	32.88	26.85	37.62	21.06
ENSG00000071189	6.96	6.43	2.72	9.22	4.88	7.47	9.93	8.57	9.98	3.75	6.57	10	9.29	2.66	3.6	9.58	4.18	10.09	9.81	8.69	6.57	11.14	10.47	8.65	4.09	6.13	1.38	4.68	1.89	6.14	5.72	7.4	6.36	1.33	8.36	7.83	9.87	5.11	8.87	7.02	7.48	8.91	7.47	11.12	5.89	7.01	9.35	9.03	5.2
ENSG00000106546	2.93	3.28	2.53	4.71	2.28	1.91	2.05	4.44	5.66	2.19	2.52	4.38	2.32	1.33	3.23	3.65	2.08	4.96	4.82	5.99	3.89	5.58	3.64	3.16	2.73	3.31	1.44	2.21	0.92	2.67	3.84	2.85	2.21	2.31	3.09	3.5	3.62	2.97	5.76	2.13	3.13	2.75	8.68	2.7	4.34	1.86	2.27	2.2	1.94
ENSG00000122507	8.76	6.53	5.62	5.59	2.43	4.53	5.91	6.64	3.02	4.91	6.08	4.85	8.95	2.08	4.14	3.99	4.15	6.36	4.55	7.07	3.66	6.04	3.02	6.03	2.72	3.85	1.43	5.68	1.83	5.14	5.11	5.03	5.07	3.46	4.89	5.62	5.89	0.54	6.68	3.72	7.09	5.49	7.67	4.04	7.34	4.51	6.59	4.58	7.27
ENSG00000122547	5.2	10.83	23.41	35.46	16.33	13.89	29.43	11.59	10.86	12.71	3.36	7.77	15.55	14.34	13.39	6.31	17.11	8.22	11.79	10.3	9.41	5.78	7.04	4.96	11.18	12.82	11.82	10.1	13.67	6.97	10.88	9.87	20.54	15.78	11.6	14.38	11.33	7.45	16.47	6.97	21.05	17.33	14.32	7.85	6.3	13.14	9	7.54	16.93
ENSG00000122585	76.92	161.28	232.95	463.63	272.13	224.14	59.62	95.51	68.27	1056.65	223.63	370.98	112.45	152.41	204.4	54.33	107.31	245.11	98.55	135.75	89.37	91.46	56.32	11.1	93.44	188.71	58.63	85.43	69.8	55.53	60.22	90.76	37.33	76.17	98.12	224.65	115.76	18.25	78.5	151.58	206.47	86.82	126.62	68.48	122.61	53.96	132.59	136.54	32.83
ENSG00000122643	31.95	21.89	9.54	33.02	5.23	21.73	25.73	23.42	11.42	8.96	17.55	9.16	12.8	5.6	7.36	12.38	7.38	11.59	8.1	11.22	10.61	14.47	12.41	9.68	4.73	8.81	0.59	14.75	5.64	6.98	6.29	17.77	15.2	1.14	14.71	6.68	13.56	9.29	11.87	12.22	16.76	12.17	12.6	3.32	14.35	13.73	13.7	14.22	13.13
ENSG00000122687	23.98	20.11	37.1	45.05	18.33	29.64	27.47	40.87	29.79	40.33	36.62	24.44	30.07	36.92	32.44	40.78	44.12	30.84	36.55	38.02	39.8	32.55	39.95	38.75	52.66	32.35	48.93	57.2	36.15	40.49	38.59	39.68	44.43	34.87	34.67	32.53	45.29	37.1	35.51	31.56	34.29	39.98	46.27	27.17	52.44	33.9	29.07	28.76	48.85
ENSG00000122705	172.01	183.44	240.81	280.92	171.92	362.56	256.01	291.22	205.24	283.59	305.42	254.87	182.47	381.19	309.98	241.72	233.81	205.76	256.73	221.3	253.35	182.93	179.06	199.73	221.25	328.46	289.23	338.75	271.74	308.66	252.9	364.06	325.03	232.43	249.2	367.18	290.01	300.75	141.92	270.72	175.22	217.94	226.6	212.96	233.74	225.6	255.37	275.41	296.09
ENSG00000122728	5.16	3.38	2.64	3.76	1.86	2.17	2.89	2.41	4.58	1.65	1.24	3.16	1.57	1.29	2.92	3.07	2.93	3.53	2.99	4.43	3.42	3.54	2.84	3.1	1.89	2.5	1.95	3.15	0.73	2.25	1.49	2.09	1.8	1.89	2.3	3.08	2.07	2.69	4.38	2.09	3.61	2.99	3.4	3.06	2.65	2.65	2.81	1.9	1.98
ENSG00000122733	27.41	74.99	14.03	24.95	167.88	56.85	41.81	72.08	142.32	150.4	85.38	91.22	46.17	123.49	104.06	97.33	128.63	75.99	67.95	64.98	86.44	132.77	126.51	49.04	118.23	67.25	113.11	49.47	98.11	77.01	108.94	57.43	56.53	96.05	86.32	70.71	60.73	38.2	53.15	104.29	66.74	96.69	44.53	134.21	58.45	72.1	26.11	99.72	46.8
ENSG00000122735	0.38	0	2.3	1.06	0	1.41	1.35	0.26	0.72	0.43	1.99	0.96	1.71	0	0.82	0.62	0	1.12	2.4	0.93	1.53	1.32	1.19	0.31	0.38	0.65	0	1.5	0.54	0.84	0.65	1.56	3.4	0	1.29	0.46	2.03	1.28	3.52	1.47	2.02	1.3	2.33	0	1.56	0.94	1.71	1.42	1.72
ENSG00000122862	15.24	43.55	388.27	262.43	3.16	42.32	56.9	32.32	31.56	28.48	53.6	24.47	93.42	13.84	124.79	28.96	66.14	46.67	80.54	31.99	96.67	14.92	24.2	147.76	20.87	127.8	12.46	85.56	278.43	33.3	195.09	89.05	20.71	125.19	18.9	33.35	18.83	258.65	238.04	41.63	91.75	20.07	353.24	35.17	55.94	38.8	125.81	23.9	88.53
ENSG00000122877	4.52	1.58	9.1	8.16	12.66	12.86	36.75	8.08	37.52	26.9	8.75	22.22	5.52	40.54	17.2	41.63	18.44	7.78	20.25	3.83	36.72	19.9	17.88	2.74	30.6	106.74	78.09	10.42	30.27	25.9	138.31	3.81	4.98	42.13	2.2	10.11	9.25	4.22	2.9	33.61	17.76	39.5	45.52	44.55	1.64	43.42	1.08	20.78	14.33
ENSG00000138286	17.55	21.17	8.82	15.91	6.69	16.29	18.43	17.31	14.63	10.87	13.43	10.59	17.26	4.05	14.07	15.55	11.81	20.77	14.4	14.77	12.88	10.17	12.34	18.66	10.7	7.44	12.23	19.75	7.82	11.86	11.68	12.45	19.14	6.89	15.46	17.64	14.86	14.57	13.72	10.34	20.18	14.59	18.76	13.43	17.13	17.01	21.41	13.32	26.9
ENSG00000076248	29.15	24.93	46.08	20.08	17.63	24.58	22.21	16.95	9.59	19.23	16.06	10.25	32.04	26.54	32.81	14.21	18.88	29.85	18.05	28.66	17.65	11.75	10.12	49.88	22.4	19.63	18.3	31.66	63.54	26.7	29.88	15.61	18.64	32.31	15.79	14.84	30.61	16.37	40.18	14.05	24.73	13.55	20.28	46.31	32.3	22.45	42.47	18.94	16.65
ENSG00000122971	9.78	8.02	19.85	15.27	13.71	28.27	21.91	8.44	12.96	14.25	29.48	13.64	42.93	33.12	35.11	18.12	18.52	26.48	27.96	28.74	18.61	7.66	7.69	38.45	13.17	13.82	23.03	36.74	25.76	17.8	19.78	25.93	15.06	25.03	26.19	16.34	24.42	41.13	26.45	18.52	30.19	9.93	13.44	21.66	38.54	28.27	12.83	18.4	38.95
ENSG00000123091	284.85	457.42	157.65	295.53	208.57	320.45	321.03	434.55	666.86	411.95	347.86	436.22	332.31	189.68	540.33	505.03	603.2	585.88	591.91	387.08	433.57	548.5	566.53	346.64	444.37	436	320.84	496.25	274.58	531.34	510.55	466.09	325.67	287.71	483.68	455.14	397.46	301.38	408.96	378.61	428.07	441.12	357.09	663.85	417.8	497.5	373.92	486	454.05
ENSG00000123095	2.33	7.83	11.15	16.08	2.18	8.58	17.98	6.37	4.35	11.78	7.54	6.98	43.62	4.09	18.2	4.99	19.89	25.4	18.2	16.96	17.05	13.71	14.5	18.86	6.9	17.82	10.31	9.07	19.77	21.68	20.99	23.61	15.86	14.94	32.57	20.9	21.86	25.19	52.03	17.85	16.32	13.17	24.07	19.39	16.24	26.74	35.58	14.32	3.49
ENSG00000123096	1.1	6.17	11.86	3.04	1.55	6.49	7.72	3.76	2.06	1.24	1.43	0.55	5.89	1.93	4.69	1.18	2.35	11.21	6.02	10.16	2.93	2.7	1.37	5.35	1.09	1.87	3.25	8.58	3.89	3.62	4.34	2.98	2.25	3.14	4.31	3.29	5.17	0.92	1.26	3.62	4.82	1.25	3.35	13.75	1.92	7.22	4.9	2.03	0
ENSG00000104915	54.25	57.91	106.77	148.65	31.11	105.14	108.77	84.9	85.03	76.74	106.75	76.81	72.42	71.29	63.79	59.97	63.05	34.88	68.27	56.75	65.49	53.73	36.01	80.7	51.06	57.51	38.11	93.47	53.08	52.54	41.58	65.68	86.28	51.72	54.36	48.58	75.05	59.38	53.56	70.06	65.74	64.72	65.06	25.61	54.32	79.72	57.95	68.1	97.62
ENSG00000123143	166.55	147.14	252.11	152.32	186.13	174.99	134.83	107.34	94.7	99.71	101.52	63.61	111.92	124.01	126.02	58.84	96.01	110.58	83.16	89.96	64.14	33.48	45.21	135.59	56.13	84.32	84.94	112.17	114.22	71.11	78.45	138.31	63.5	126.88	70.19	57.66	100.96	187.75	105.94	81.74	135.96	49.21	117.17	66.46	84.17	93.69	123.89	54.66	135.87
ENSG00000123144	313.33	266.19	711.19	291.28	267.22	518.76	207.65	368.1	204.11	431.53	397.98	231.17	204.38	435.24	478.56	260.96	254.93	232.81	243.16	265.28	203.98	152.66	161.59	260.54	202.44	371.49	312.3	344.4	266.22	216.86	223.97	448.16	268.66	256.28	201.17	353.18	262.6	323.27	146.03	315.76	221.99	260.96	262.89	246.44	238.04	204.14	201.88	377.06	338.54
ENSG00000123146	2.9	1.85	11.87	10.56	1.94	1.83	4.06	1.41	3.86	3.95	4.01	7.02	2.95	6.53	8.51	2.88	6.18	4.21	6.14	9.03	7.42	4.06	1.29	5.35	3.88	5.62	5.79	4.43	9.35	5.2	10.48	5.86	5.91	28.27	5.55	5.19	4.36	20.63	5.68	4.53	7.24	12.62	18.59	6.88	2.64	4.41	2.37	3.05	4.33
ENSG00000198342	1.29	2.16	0.77	5.61	0.2	1.26	2.1	1.75	0.53	0.48	1.38	1.28	2.67	0.5	0.61	0.46	0.3	1.87	1.67	0.83	0.85	0.63	0	6.23	0.63	0	0.32	1.67	0	0.23	0.24	0.29	2.04	0.3	0.96	0.51	1.25	2.85	2.2	0.94	1.12	0.73	1.82	1.78	0.75	1.4	2.45	1.84	0.64
ENSG00000114796	29.56	13.27	6.95	23.45	4.4	7.57	10.35	10.99	10.3	5.27	9.26	10.71	11.56	4.97	7.3	9.34	6.36	13	11.53	13.67	6.25	11.62	12.25	11.94	8.17	4.56	4.62	10.45	4.74	10.52	8.31	5.74	6.09	2.87	11.5	9.63	9.7	7.07	15.87	8.57	9	9.86	8.42	39.08	8.83	12.1	19.34	9.07	6.02
ENSG00000123179	83.78	61.84	60.04	88.88	27.4	55.42	62.18	28.56	21.86	19.73	36.81	14.19	41.75	35.23	28.5	17.02	26.18	36.47	50.96	13.8	24.47	11.49	19.78	36.56	19.82	31.26	35.76	42.34	43.76	27.46	32.02	39.54	23.91	32.16	30.86	17	24.52	50.08	23.94	20.14	27.82	16.08	32.52	13.92	28.17	24.68	44.69	16.45	67.58
ENSG00000123200	49.52	42.3	9.15	37.78	30.6	26.8	37.95	35.63	48	13.3	38.45	36.81	32.15	13.28	15.09	34.31	14.43	41.42	37.61	37.12	30.09	49.6	41.99	23.59	21.63	14.64	11.75	32.76	9.11	25.99	14.05	24.04	29.15	13.42	38.71	29.46	32.76	23.44	35.12	31.37	29.46	42.33	33.95	42.89	33	28.12	28.07	35.43	27.23
ENSG00000123353	7.43	5.54	44.38	25.6	5.79	14.57	12.14	11.82	9.23	26.39	9.6	24.69	22.05	7.23	12.29	10.59	17.6	14.38	11.59	19.2	6.58	7.28	9.24	12.01	8.55	21.01	14.59	21.67	26.23	10.83	20.89	18.37	6.73	17.61	13.83	14.79	10.15	30.85	18.41	16.24	23.82	6.99	19.53	0	33.03	14.19	25.17	12.16	33.31
ENSG00000123360	4.88	8.18	10.68	13.82	10.89	9.16	14.04	23.65	24.58	28.27	33.97	24.85	24.6	37.99	22.66	32.16	43.5	18.48	44.81	43.07	44.26	35.83	44.45	31.97	40.08	46.89	52.66	25.28	47.05	46.49	49.35	40.57	31.3	47.4	41.44	37.21	38.39	27.9	26.02	28.72	17.05	32.12	12.82	22.52	33.62	24.4	19.97	41.91	10.53
ENSG00000123384	53.51	53.2	92.14	39.95	78.18	50.98	64.33	48.32	51.37	54.24	42.15	39.9	63.27	45.58	65.06	38.85	62.27	54.89	37.21	48.69	42.78	43.25	43.45	45.4	42.33	28.06	41.29	41.72	61.27	32.43	51.07	29.88	29.17	82.46	34.63	27.88	44.83	47.91	58.84	47.31	65.81	42.13	48.34	46.92	35.84	56.59	51.22	44.92	33.96
ENSG00000117480	37.13	39.11	29.56	39.66	37.96	62.1	51.23	59.42	52.48	85.08	75.09	74.81	50.76	49.96	41.94	44.87	39.74	69.09	68.82	81.85	66.44	48.74	59.51	62.17	44.56	75.29	64.55	77.91	65.7	57.91	63.21	95.78	100.16	60.82	82.28	101.82	79.04	79.07	49.82	48.5	54.08	54.66	49.6	35.77	88.57	39.63	43.74	56.79	74.75
ENSG00000117616	214.63	163.98	108.28	234.52	13.4	236.65	235.12	161.46	145.99	87.67	220.55	202.84	206.64	17.29	98.34	127.08	55.85	132.21	215.72	182.87	171.36	157.63	137.95	241.45	45.15	112.19	29.28	243.65	60.72	50.03	99.83	137.23	174.72	29.6	133.72	122.04	175.97	76.81	175.01	146.07	164.94	199.45	256.41	61.5	212.89	178.68	196.82	184.5	187.95
ENSG00000123570	26.66	23.1	7.16	10.1	9.96	4.9	10.26	5.45	37.26	12.7	19.8	15.27	8.3	3.89	10.39	17.81	19.88	19.34	19.75	18.08	18.58	25.45	31.47	5.38	16.42	12.43	9.81	14.25	6.58	34.22	18.73	29.65	15.39	11.37	20.08	33.41	19.5	7.75	15.23	17.47	13.98	18.8	21.01	33.22	20.86	12	9.31	22.08	9.95
ENSG00000123607	14.1	9.83	4.03	11.55	4.58	6.76	11.02	9.06	10.54	4.47	8.98	13.24	9.82	3.7	5.65	9.94	5.37	10.82	10.52	13.47	11.67	14.61	16	9.08	7.15	9.01	4.06	9.93	2.74	11.73	8.27	13.64	14.44	4.21	12.66	11.47	11.37	5.26	14.25	9.16	10.54	16.27	11.41	17.83	13.15	9.37	11.29	12.67	7.33
ENSG00000123609	0.87	0.98	36.02	27.7	0.82	8.99	7.34	6.55	3.8	2.45	3.95	3.92	12.45	1.02	16.1	5.14	2.48	3.17	5.45	6.78	6.96	3	3.8	15.54	2.15	2.22	1.29	11.89	0.62	4.3	2.95	6.48	2.97	3.73	3.9	5.22	2.05	14.51	13.49	4.78	23.68	0.99	17.49	0	8.11	14.31	14.43	2.68	26.11
ENSG00000123612	0	3.05	0.65	4.5	3.31	0.8	2.29	3.72	3.05	0.61	2.82	2.72	0.97	1.91	2.32	2.91	5.03	0.79	8.5	3.96	1.45	4.27	5.76	2.64	2.69	0.92	0	3.71	1.15	8.34	2.45	2.2	2.96	2.32	4.56	3.25	1.91	1.81	5.29	2.98	1.91	5.23	2.31	13.58	2.21	2.23	4.15	3.34	1.63
ENSG00000123685	5.49	18.43	29.53	43.52	16.69	26.25	26.93	16.85	18.77	21.56	19.52	35.59	26.89	32.09	25.31	30.83	33.17	27.9	36.42	11.98	40.12	32.28	29.01	17.76	29.79	27.96	20.22	72.08	46.53	18.01	27.79	29.64	20.53	23.44	24.53	24.6	33.76	36.49	14.13	33.02	16.81	6.2	8.33	57.06	30.25	60.7	41.87	33.71	32.83
ENSG00000123739	21.25	11.09	19.46	18.55	9.93	16.66	24.8	9.66	19.37	8.74	12.82	22.59	12.61	9.1	9.04	12.87	20.13	14.39	9.94	12.36	23.52	18.04	15.85	18.32	13.97	15.62	11.47	12.39	5	11.61	13.54	8.6	8.66	9.07	16.61	13.53	12.44	14.12	13.77	19.35	17.34	12	17.19	23.55	20.53	9.28	13.5	14.78	8.47
ENSG00000077312	88.47	118.08	170.99	168.41	78.68	130.06	89.25	91.44	67.97	76.81	97.72	67.31	103.28	90	82.92	67.12	75.67	81.43	92.73	75.12	68.84	47.97	63.24	103	57.68	88.74	88.91	74.88	104.06	75.35	80.73	114.17	105.99	115.65	70.08	71.55	104.67	125.58	82.64	74.32	69.84	79.46	100.38	55.33	103.11	80.19	116.6	64.21	137.84
ENSG00000123810	18.87	12.66	11.27	18.2	19.4	5.55	5.28	18.01	16.41	23.28	39.01	7.52	16.79	22.04	13.37	14.12	2.68	13.69	2.94	12.8	20.04	3.7	7.03	6.1	13.02	9.6	13.89	7.34	15.98	14.43	8.48	2.54	20.51	13.42	10.53	9.01	15.46	18.8	6.47	8.25	3.3	17.04	11.44	0	15.31	24.71	9.59	9.26	16.91
ENSG00000204604	8.24	5.18	1.84	7.09	1.68	3.78	5.05	4.21	3.52	1.73	1.66	4.87	2.29	1.2	2.55	2.75	1.46	2.24	2.81	1.5	1.37	2.77	2.24	2.5	2.28	1.31	0.38	3	1.45	3.09	1.16	3.47	1.4	0.73	4.02	0.92	1.51	3.42	5.59	2.25	4.05	4.94	2.19	0	2.69	2.95	5.56	2.84	6.15
ENSG00000256683	16.16	9.32	6.03	15.66	3.54	14.11	18.39	12.74	9.1	2.83	11.42	10.07	12.59	1.47	5.01	10.53	3.59	8.79	13.79	9.79	9.72	9.15	6.28	7.35	4.98	5.14	1.86	10.31	2.14	6.62	4.83	7.15	2.75	2.51	7.33	7.84	8.87	7.55	15.88	8.55	10.59	9.41	12.25	4.2	13.76	9.92	14.76	5.58	12.07
ENSG00000123901	3.81	11.01	0.76	5.69	7.71	1.4	2.22	1.73	8.68	3.92	4.1	3.16	2.83	2.97	7.2	6.11	3.61	17.04	5.45	11.07	9.27	8.39	7.1	6.67	10.02	4.31	7.48	8.02	8.07	12.49	10.35	6.42	5.18	18.06	7.8	8.72	6.32	4.22	4.35	3.12	6.1	6.45	3.47	13.19	6.26	5.72	2.82	4.68	1.9
ENSG00000214367	14.26	14.21	3.73	17.19	4.37	8.52	18.1	12.15	6.65	4.75	8.64	8	14.28	3.12	6.63	8.81	4.75	9.7	11.12	9.5	7.69	9.38	8.86	9	4.17	4.91	0.98	9.53	1.57	4.38	2.51	10.22	8.18	1.27	10.7	5.85	10.17	8.88	16.81	6.82	10.52	7.3	13.79	7.41	11.63	13.5	12.74	5.74	6.66
ENSG00000123989	83.26	137.92	145.23	154.38	293.57	196.87	125.09	157.51	121.35	166.51	188.5	146.6	126.58	274.33	154.64	162.25	179.37	92.61	111.74	117.99	140.5	90.02	88.37	108.48	123.31	135.63	169.53	119.35	161.6	96.66	138.25	113.92	75.89	131.46	96.61	72.27	106.6	148.05	99.33	196.36	102.18	105.73	116.77	108.1	97.53	92.56	155.99	137.52	83.96
ENSG00000123999	15.4	40.2	7.45	19.2	2.06	39.36	32.36	41.01	18.23	6.58	32.23	7.31	15.01	3	8.84	9.02	9.38	9.05	24.6	26.65	21.92	8.98	10.94	16.6	6.15	14.31	6.48	9.27	4.14	4.41	8.66	24.73	20.43	3.65	15.56	9.2	22.32	34.71	11.32	13.63	6.41	14.08	18.68	3.05	14.88	10.21	6.52	13.05	20.82
ENSG00000124074	34.2	30.89	52.63	47.12	22.74	35.77	28.55	25.11	17.16	19.18	37.39	17.04	35.12	29.19	29.83	18.28	26.16	32.44	26.67	31.23	20.96	12.88	13.89	48.89	20.75	14.5	26.14	38.35	21.35	28.74	20.7	42.57	26.81	28.06	17.62	19.63	28.48	34.95	36.08	15.81	28.74	22.27	38.29	27.32	21.35	22.61	32.58	16.14	55.02
ENSG00000101442	10.18	7.92	10.84	7.02	6.21	8.79	8.99	6.64	6.05	5.46	9.44	4.41	7.88	5.95	9.41	7.81	6.92	7.39	8.63	9.65	7.64	8.67	8.25	10.38	6.98	8.26	3.58	9.04	5.94	6.05	10.45	13.14	11.73	6.3	8.4	5.02	10.11	9.56	6.33	5.08	6.97	7	10.74	3.68	7.96	7.25	9.84	11.41	5.29
ENSG00000124140	18.15	34.09	7.77	29.49	67.98	23.7	24.85	44.33	75.91	77.32	67.39	73.04	39.3	92.09	79.68	86.02	123.92	52.67	78.81	72.59	105.76	111.82	122.54	42.91	117.4	88.69	132.59	46.87	116.45	88.21	109.79	63.75	75.28	107.67	83.76	82.48	67.23	30.59	73.39	97.39	53.04	137.01	46.83	85.54	73.97	73.61	36.13	97.09	26.31
ENSG00000124172	947.43	506.6	562.68	1497.88	70.15	1130.24	790.18	804.71	517.85	705.4	648.9	626.91	691.07	749.82	796.13	816.33	577.27	589.64	851.89	406.33	615.25	418.24	479.27	602.39	464.49	1154.73	521.99	1076.71	796.54	800.39	442.29	694.66	953.16	397.52	699.2	852.94	572.68	765.1	429.02	560.03	764.68	502.57	737.85	623.75	636.18	838.91	877.85	438.41	1415.28
ENSG00000124181	61.89	44.16	87.23	35.31	24.34	33.54	71.48	46.17	29.39	25.47	48.19	31.57	31.34	22.63	36.32	30.29	25.01	27.21	33.15	39.77	29.05	34.99	25.89	52.53	24.65	23.15	23.77	39.08	22.79	21.29	23.42	26.55	32.84	28.89	30.23	23.38	43.05	27.85	35.25	33.13	38.97	36.81	40.44	25.97	41.43	38.03	63.12	38.1	33.62
ENSG00000124193	95.38	67.25	98.44	115.7	17.92	142.51	132.83	96.12	125.6	73.25	117.22	106.94	123.63	9.69	83.02	85.89	67.74	109.05	140.68	65.3	72.96	87.31	77.94	31	43.95	35.17	25.94	115.87	29.27	42.48	59.44	48.93	79.59	43.49	70.01	73.65	84.95	48.2	93.62	68.54	134.1	102.4	163.48	21.54	94.95	106.06	153.41	75.07	150.23
ENSG00000124209	7.36	6.58	7.91	4.05	4.81	6.49	5.15	6.02	6.4	10.72	3.8	9.53	15.71	3.44	6.25	5.5	3.13	11.74	8.03	7.13	6.84	11.52	9.14	7.13	6.53	11.23	8.66	8.58	1.04	5.63	9.1	3.97	2	6.28	4.1	10.54	8.61	10.99	8.41	9.64	9	6.64	17.84	24.45	5.12	8.43	6.54	8.12	2.2
ENSG00000124212	4.84	7.21	7.38	2.96	7.28	3.95	4.14	5.49	7.34	2.71	6.6	4.82	4.3	3.45	9.14	4.31	0.76	3.12	8.8	2.6	2.5	3.95	3	1.3	2.12	0.91	3.95	0.52	4.55	2.64	2.11	2.17	0.73	14.9	2.1	1.28	0.94	1.78	4.61	2.94	4.23	4.25	8.8	4.46	3.43	1.32	2.39	4.62	3.21
ENSG00000124215	0.63	0.71	0	0.43	0.15	0.7	1.33	1.51	0.59	0.18	1.02	0.63	0.84	0.55	0.89	0.51	0.67	0.46	0.74	1.83	0.63	0.93	0.2	1.53	0.16	0.27	0.7	0.61	0.22	0.17	0.18	0.43	1.07	0.22	0.88	0.94	0.92	1.83	1.62	0.69	0.28	0.71	0.77	1.31	1.65	0.77	1.2	0.77	0.94
ENSG00000124217	13.43	9.47	11.86	12.07	12.28	9.01	6.54	13.93	9.43	13.43	13.58	13.97	8.83	17.73	11.59	12.8	24.06	9.32	8.65	13.86	10.08	10.86	13.42	6.13	16.98	13.87	18.05	8.51	14.01	12.44	13.13	13.78	11.51	12.46	14.34	13.25	14.7	9.7	9.34	11.17	7.15	9.56	10.27	14.56	13.54	10.04	9.64	13.98	5.23
ENSG00000124226	28.21	20.38	49.14	33.2	3.85	26.79	27.16	16.83	22.64	21.09	15.95	20.5	28.25	13.73	26.66	13.82	16.7	22.17	27.5	38.73	19.51	14.97	15.34	20.9	15.07	20.94	8.65	15.99	19.91	16.06	23.79	22.19	18.37	13.37	11.81	15.44	21.33	27.33	32.25	10.92	26.71	19.9	26.38	24.42	20.44	17.32	32.85	20.2	28.1
ENSG00000124299	33.72	40.91	61.44	72.45	86	94.11	80.44	60.79	42.26	65.06	34.71	71.49	56.46	95.47	67.24	63.85	83.22	43.12	52.6	49.84	58.82	62.69	52.56	57.27	80.59	82.41	86.65	74.43	68.17	74.63	80.63	52.41	67.18	84.52	51.04	64.48	83.97	86.84	47.04	78.07	73.43	64.2	61.7	56.99	57.65	66.42	49.73	55.77	73.43
ENSG00000124370	15.21	5.95	9.08	25.15	2.84	7.83	18.1	16.59	16.06	11.09	22.6	15.16	10.83	11.55	15.09	17.07	15.12	11.03	18.98	18.42	15.15	11.91	8.5	19.66	6	18.06	10.07	22.17	9.66	22.43	18.81	18.46	22.73	9.73	18.67	17.25	13.35	27.78	20.86	12.46	14.62	12.88	24.91	18.96	14.99	13.69	8.69	14	18.18
ENSG00000124383	59.47	24.1	7.46	54.03	8.46	38.33	42.54	33.49	30.79	8.7	38.15	30.28	36.05	9.06	7.02	22.81	11.02	28.45	26.55	34.66	35.48	28.91	27.58	36.22	13.38	24.49	10.15	34.76	6.69	26.84	10.17	41.26	37.48	4.9	33.91	30.61	34.81	40.43	24.63	24.02	27.87	33.32	36.33	25.07	33.47	30.68	41.05	26.18	43.13
ENSG00000079435	8.07	5.71	7.07	7.04	7.79	10.87	9.98	10.08	6.35	19.3	18.24	27.21	9.81	10.99	11.05	4.17	7.83	24	5.45	22.15	7.86	6.32	5.35	9.56	8.88	23.26	14.45	9.93	7.97	8.67	11.19	13.96	17.36	8.99	13.51	31.14	18.57	18.09	8.45	6.61	11.75	14.88	7.83	4.47	13.41	8.14	9.05	6.77	15.27
ENSG00000112146	74.52	105.51	33.37	108.87	70.2	114.85	111.49	150.76	185.18	160.38	142.1	180.27	105.88	100.02	149.47	181.8	164.74	129.91	196.82	119.07	212.24	215.07	217.67	71.86	228.1	200.79	184.42	199.14	90.76	263.93	178.67	192.05	239.64	116.63	228.38	222.76	152.29	120.24	86.54	196.65	130.25	229.94	184.04	179.75	140.37	166.22	67.17	160.77	162.48
ENSG00000124507	53.23	87.44	15.89	47.56	158.96	159.57	189.84	366.31	550.34	476.64	364.34	373.45	437.45	585.33	740.91	491.26	576.55	621.48	466.38	407.4	513.55	540.4	597.91	397.2	568.71	414.77	645.8	272.41	653.36	422.12	565.2	452.58	334.52	552.31	367.63	371.88	389.44	290.04	466.8	473.05	513.22	378.83	224.47	435.4	463.31	616.03	278.9	609.41	470.91
ENSG00000124541	48.67	44.58	60.6	62.77	58.06	55.56	58	60.71	51.46	59.8	39.47	58.31	52.52	58.66	68.97	68.63	66.92	54.83	56.52	57.19	65.31	56.27	46.32	40.16	63.8	57.08	72.39	70.44	65.77	59.96	57.03	53.76	72.45	55.21	74.54	64.28	43.63	62.76	39.06	57.13	52.49	61.94	64.05	43.02	54.62	50	34.85	47.65	66.51
ENSG00000111801	2.3	3.6	12.64	11.1	4.3	7.78	10.63	14.12	5.72	7.48	2.68	5.05	11.06	4.03	14.02	6.64	9.15	14.02	11.48	11.37	10.08	6.53	5.72	11.53	10.44	6.63	9.82	8.94	7.79	11.06	10.6	11.17	13.13	12.11	11.04	7.97	8.62	4.97	60.49	11.31	41.02	12.21	25.68	5.74	8.54	24.1	24.55	7.34	11
ENSG00000124574	36.88	32.76	33.84	26.2	31.95	34.59	48.14	32.87	28.64	27.35	31.52	27.28	24.95	17.72	21.5	27.41	22.51	16.44	30.56	30.99	22.95	23.13	21	21.26	13.92	21.01	16.82	22.4	17.76	12.7	21.48	18.78	26.75	16.25	21.22	16.51	26.98	18.18	24.26	32.32	26.52	27.53	33.43	11.17	28.95	26.56	34.03	31.47	27.83
ENSG00000124608	17.47	16.18	21.36	14.11	20.03	13.25	22.17	21.41	22.73	31.54	17.82	24.49	18.22	27.11	35.21	25.1	23.46	22.98	22.78	19.45	23.75	26.74	21.04	21.18	25.04	22.23	23.11	26.53	27.75	19.39	23.02	18.04	22.82	20.96	19.96	23.96	29.08	14.73	23.25	20.88	33.65	27.89	24.18	14.75	21.84	30.61	23.06	22.79	35.08
ENSG00000124613	6.75	7.13	0.9	7.23	4.91	5.51	13.65	9.71	11.18	1.68	11.63	6.73	10.01	1.75	5.85	10.42	5.33	9.25	15.79	9.81	9.46	10.65	9.78	9.09	7.76	3.18	3.31	15.3	2.65	9.83	5.9	5.56	4.08	4.8	10.46	8.95	11.41	2.49	6.43	10.65	6.55	12.7	9.1	9.35	11.3	8.59	10	14.73	7.84
ENSG00000124733	182.37	217.7	254.11	282.17	193.43	406.41	207.74	446.99	261.67	362.77	290.82	307.26	325.87	557.88	362.07	323.38	316.61	307.64	318.3	240.52	303.65	251.57	295.86	258.46	320.37	385.43	401.58	451.52	399.41	411.95	341.67	366.94	341.21	343.69	372.37	360.28	346.47	356.9	201.83	326.58	297.27	222.19	360.77	180.39	348.17	383.78	245.42	251.35	462.7
ENSG00000124749	0.56	1.89	0.17	2.32	0.53	0.41	4.33	3.64	3.49	0.47	2.72	1.54	1.75	0.98	1.99	2.1	1.2	4.28	7.45	4.49	2.05	2.06	2.27	0.91	1.94	1.19	0.41	4.37	0.4	0.46	2.53	3.79	1.72	1	3.61	1.85	4.11	1.17	4.34	3.38	8.1	0.48	7.67	0	2.93	5.29	2.5	1.55	1.68
ENSG00000124766	206.3	77.96	507.68	40.21	30.19	27.91	23.81	12.75	20.42	16.21	16.48	9.89	5.55	8.94	22.09	11.81	11.67	9.87	13.7	4.94	6.77	5.55	5.28	1.37	5.87	3.36	2.5	3.3	4	4.03	5.73	1.91	1.93	2.42	3.16	3.04	1.33	1.41	10.04	13.93	10.9	15.03	7.22	7.06	5.26	9.28	2.88	5.22	5.93
ENSG00000124772	28.92	51.29	19.35	12.71	81.53	35.91	41.19	50.3	75.88	104.83	69.57	75.77	45.25	90.26	59.71	67.15	87.81	84.27	57.15	65.7	67.52	99.34	91.07	56.4	74.22	101.05	91.36	54.75	96.06	67	87.14	76.31	48.77	88.96	74.29	63.39	67.4	37.25	57.84	78.44	30.94	80.47	40.51	51.78	65.02	51	56.36	116.25	34.26
ENSG00000124785	107.31	107.37	28.11	134.87	78.29	480.19	216.16	628.88	642.12	495.07	650.72	737.38	464.06	499.15	514.97	876.45	574.94	431.56	653.33	436.89	684.93	799.15	773.15	540.02	682.12	873.33	710.76	720.85	491.61	816.59	605.24	757.81	735.42	341.3	596.76	648.42	660	309.48	264.68	826.93	255.03	824.51	437.29	649.17	465.95	414.45	320.41	673.5	787.44
ENSG00000124788	25.07	32.84	15.96	20	29.44	19.64	17.32	26.76	62.72	37.74	26.22	32.22	18.5	23.12	47.93	30.86	45.93	28.72	32.93	25.09	24.09	45.87	47.96	18.93	30.9	16.79	18.45	13.47	20.02	27.03	31.15	19.35	10.31	26.04	17.68	24.03	22.78	9.31	30.17	26.68	32.01	30.91	18.61	65.79	18.93	57.24	14.67	29.96	22.67
ENSG00000125037	23.72	32.49	52.41	62.91	43.78	59.28	58.12	60.64	44.95	62.51	66.66	54.96	66.49	92.12	40.34	71	76.65	56.78	59.19	62.63	82.67	69.1	60.42	75.7	79.51	96.55	75.93	78.37	89.56	74.51	73.99	64.77	70.9	53.12	76.11	76.46	72.88	79.76	67.78	65.44	44.57	65.6	72.64	54.2	86.62	72.79	70.8	74.23	70.86
ENSG00000125124	64.13	84.86	52.99	95.55	24.91	85.51	131.31	88.97	61.62	37.21	81.18	50.35	111.16	40.29	74.25	77.93	62.76	105.49	103.52	111.46	80.7	65.36	51.66	145.82	65.8	60.4	59	132.99	44.47	75.98	75.24	79.95	86.13	48.25	89.06	69.67	98.2	139.62	92.48	67.63	120.25	53.45	86.38	94.49	102.01	109.85	94.48	77.57	91.35
ENSG00000125166	127.42	108.97	111.16	108.86	195.84	103.76	65.16	107.31	126.9	164.26	146.49	172.75	120.62	227.26	170.86	170.94	213.82	170.83	157.82	189.14	189.51	196.95	234.79	158.98	237.71	224.07	384.76	183.32	280.81	254.55	277.35	221.95	262.67	265.11	235.3	269.57	205.09	147.28	110.66	193.83	123.37	212.93	135.24	249.12	196.23	156.42	146.77	182.83	120.37
ENSG00000125249	140.46	93.26	55.04	63.5	50.59	38.72	74.78	56.85	129.08	55.79	59.55	68.54	57.29	31.61	45.62	89.93	81.05	84.91	98.13	102.78	79.65	129.66	152.72	65.02	65.64	55.84	40.92	89.58	30.98	107.9	67.43	88.79	48.71	28.09	72.67	87.34	96.76	43.73	71.91	92.72	60.1	80.92	67.44	109.41	61.91	50.29	53.89	102.35	43.71
ENSG00000125266	142.26	70.31	42.75	26.55	58.32	30.36	45.62	38.17	45.62	32.93	18.97	37.5	17.15	27.87	18.86	32.87	33.24	32.62	35.07	29.79	36.56	47.63	44.48	20.02	32.57	24.91	20.26	12.49	21.38	29.08	43.33	22.9	9.35	27.4	19.98	31.23	27.93	12.19	36.19	36.6	18.45	13.99	46.75	45.75	28.73	22.53	19.23	32.66	13.71
ENSG00000125347	2.48	6.46	445.31	31.86	3.09	9.71	13.3	6.76	7.7	8.33	6.94	6.17	20.58	10.61	49.16	5.3	8.8	11.38	9.66	13.2	11.51	5.66	4.1	22.69	6.11	8.4	9.72	9.63	20.4	7.22	13.46	14.48	9.54	15.85	4.61	8.38	2.9	30.17	26.43	4.06	29.59	4.19	38.06	17.15	8.14	10.14	13.11	6.08	14.8
ENSG00000100503	24.73	11.57	3.39	12.25	8.78	5.84	13.25	9.55	17.48	4.53	12.71	15.84	8.76	3.46	6.7	13.08	6.9	13.09	15.05	12.9	12.98	15.5	14.27	9.17	5.72	6.21	2.79	10.05	3.03	6.2	5.39	6.46	5.4	4.39	8.87	9.11	9.82	7.86	14.06	10.48	7.28	11.75	12.16	20.96	10.53	11.56	8.89	11.61	6.41
ENSG00000125398	39.59	110.98	348.64	126.91	48.59	84.98	176.66	71.97	25.58	25.45	43.65	13.68	116.5	40.38	46.01	28.78	38.99	71.61	26.35	84.39	13.67	9.05	5.9	157.39	21.6	12.09	33.41	48.22	65.57	13.55	36.49	5.69	5.74	31.15	10.61	9.14	62.72	79.32	96.24	29.13	83.04	15.19	25.93	81.14	33.66	59.18	144.48	33.36	25.23
ENSG00000125445	87.52	100.35	82.7	133.56	81.79	167.76	97.73	144.26	119.76	185.12	117.39	130.84	131.12	179.22	159.37	158.11	152.64	117.34	134.78	132.57	170.64	136.15	128.03	136.96	158.38	169.12	194.05	205.64	194.69	199.72	140.73	125.49	199.45	115	163.22	154.75	149.13	162.8	89.91	153.74	151.05	144.44	152.52	133.48	193.29	198.56	111.16	120.33	213.49
ENSG00000125447	42.57	52.1	47.97	29.05	79.19	39.56	45.27	55.03	55.89	58.1	54.23	58.64	45.39	59.81	55.78	50.45	55.05	50.4	51.36	73.35	63.19	70.98	59.64	51.6	64.54	59.6	67.09	40.59	55.27	56.6	51.92	44.41	61.39	67.67	57.15	58.25	59.7	34.68	51.64	67.36	48.79	61.88	50.17	46.72	69.84	51.93	52.28	64.07	40.2
ENSG00000125449	10.82	20.42	16.16	15.84	32.24	21.88	23.68	15.68	15.97	22	28.84	17.53	16.85	32.39	18.21	22.42	22.1	16.68	16.88	16.39	21.56	14.57	7.56	22.96	23.34	24.09	17.92	24.98	16.23	17.74	15.21	23.72	22.06	16.35	18.12	18.57	23.75	11.23	13.14	19.22	22.46	16.8	20.51	22.48	21.17	17.71	12.89	17.43	22.23
ENSG00000125450	35.78	49.37	56.06	44.5	30.18	38.6	36.11	27.88	33.78	28.66	48.34	53.95	30.19	35.82	34.91	33.28	23.76	27.31	44.21	27.24	37.64	32.99	28.01	34.54	29.32	26.01	21.55	37.48	29.52	27.16	26.64	39.17	48.93	30.06	30.6	31.34	27.74	47.07	35.85	43.16	30.46	29.64	51.01	32.82	34.48	39.93	38.07	36.78	43.73
ENSG00000125457	24.09	25.77	31.28	28.14	26.43	24.64	29.34	26.42	18.22	23.49	16.92	19.84	23.3	26.92	24.5	15.12	21.58	22.04	16.34	24.36	16	14.36	12.37	27.09	19.11	23.1	20.04	24.43	22.92	12.59	22.37	21.19	29.18	36.49	18.71	21.89	20.84	33.05	26.34	17.74	21.97	17.14	34.94	13.06	26.72	16.29	13.3	10.93	39.12
ENSG00000125458	29.32	27.57	87.55	67.02	27.4	46.04	49.45	31.8	35.6	45.58	41.33	29.22	47.44	56.04	42.5	27.07	40.7	51.24	54.05	41.32	31.85	20.88	19.04	33.38	21.68	39.56	35.31	56.99	45.15	31.31	38.2	63.8	60.66	36.01	42.39	40.57	51.48	109.54	54.08	32.77	40.77	30.84	51.73	27.68	31.67	42.54	26.24	29.44	83.62
ENSG00000125459	10.84	9.49	23.65	12.34	14.1	10.05	15.51	23.14	21.09	14.8	14.32	13.63	19.3	22.03	15.7	17.39	14.06	17.1	21.33	15.08	15.65	13.16	16.99	13.33	12.32	18.39	17.7	16.5	15.97	16.74	19.08	17.8	25.94	17.43	23.68	15.76	17.94	21.14	14.55	13.39	18.13	21.29	21.73	15.67	15.3	15.43	9.28	19.38	17.61
ENSG00000125505	111.52	177.52	112.25	235.43	293.33	316.66	221.02	255.06	160.36	229.45	252.76	212.88	200.09	331.42	196.3	235.55	249.11	153.97	196.39	245.31	254.96	199.92	175.46	253.62	215.92	231.87	314.4	237.74	353.55	248.12	251.23	280.77	166.19	273.67	252.46	217.96	267.4	252.38	187.1	231.92	122.62	128.42	163.09	179.35	263.26	175.18	363.83	284.22	110.17
ENSG00000130584	21.45	26.53	12.53	12.57	47.12	16.1	11.5	14	24.1	20.72	12.68	12.05	11.37	12.26	21.34	12.19	14.58	10.92	13.17	15.25	10.91	11.39	9.92	11.43	12.82	8.51	9.07	7.98	15.46	9.97	16.16	11.69	4.03	15.25	7.64	12.8	10.42	9.47	12	16.7	13.56	7.47	14.11	11.37	9.52	17.55	7.82	20.72	11.59
ENSG00000115084	10.36	7.62	12.37	12.77	3.57	10.82	12.98	8.55	9.49	2.45	7.4	5.16	11.65	3.18	4.25	9.33	3.87	11.08	7.23	10.3	6.15	4.27	6.78	12.78	5.11	2.77	0.8	10.07	1.92	4.77	4.9	6.25	4.45	3.1	7.3	6.18	6.7	12.68	16.52	4.47	8.58	8	9.26	15.86	6.95	3.57	13.16	7.36	5.7
ENSG00000125629	22.63	23.98	22.76	19.69	15.03	16.64	15.01	19.49	26.64	12.02	23.86	27.9	23.32	9.74	8.44	32.47	21.15	17.28	25.08	30.01	26.89	41.99	39.97	21.18	22.9	20.2	18.41	20.84	7.57	27.98	31.47	19.28	21.85	14.4	28.59	32.71	21.61	8.9	30.64	24.73	10.41	36.3	22.4	19.8	28.31	22.42	24.21	31.43	12.46
ENSG00000125637	0.82	3.51	8.31	3.01	6.75	4.81	4.2	4.65	4.58	5.96	2.64	1.5	5.1	5.58	5.03	2.77	5.04	4.75	2.34	3.04	2.72	2.8	1.69	4.41	2.82	2.54	3.21	1.06	5.2	2.38	4.45	4.05	0.74	7.17	3.96	3.74	4.95	7.02	7.79	4.32	3.81	4.46	4.96	2.27	3.64	2.01	4.33	3.01	2.85
ENSG00000125652	100.65	99.68	163.66	108.6	140.53	172.04	82.36	85.15	81.37	123.75	108.9	66.47	103.6	176.34	154.68	75.19	96.46	69.5	96.46	96.94	67.63	35.03	37.67	83.29	57.99	183.06	76.75	139.06	124.96	74.2	117.91	151.27	84.86	94.84	64.97	102.07	134.85	139.95	54.06	97.39	99.63	70.49	92.67	45.34	78.02	105.2	93.96	93.76	144.92
ENSG00000125656	62.82	99.52	172.38	75.21	99.24	123.13	85.86	96.86	85.49	100.63	123.68	79.75	77.2	136.26	122.95	60.76	63.73	78.12	101.47	76.81	61.56	49.79	43.67	65.26	84.79	74.84	90.26	93.02	106.61	78.44	79.86	101.85	85.35	111.65	64.27	78.56	89.29	115.48	86.33	108.68	65.36	64.15	83.45	37.28	68.49	93.02	94.03	78.01	100.54
ENSG00000125730	2.72	19.94	296.02	12.91	21.89	10.22	7.83	12.57	34.55	48.81	8.98	6.48	53.8	3.71	40.05	1.62	72.77	36.62	12.49	7.03	13.04	32.71	9.2	6.11	27.86	6.66	13.57	10.57	39.89	10.24	8.15	39.54	10.88	136.89	9.61	32.66	6.19	138.52	173.09	33.19	28.27	24.22	48.03	11.3	36.97	29.19	155.48	10.02	20.32
ENSG00000125755	36.86	43.64	58.91	21.66	47.62	22.31	36.43	39.91	30.31	54.1	39.22	39.44	37.62	37.35	35.34	32.45	30.8	54.26	34.66	47.27	34.55	29.19	39.07	35.04	41.15	36.78	59.84	31.61	46.67	41.46	43.87	29.97	41.24	40.85	36.3	37.53	55.83	31.5	42.13	30.21	46.43	55.07	39.45	18.02	38.33	39.04	26.85	53.88	25.91
ENSG00000089101	0.69	1.16	1.37	1.27	0.54	1.01	1.45	1.1	1.14	0.9	2.23	1.37	0.82	0.54	0.81	0.98	1.8	0.5	1.43	0.33	2.29	1.58	1.43	0.93	1.02	1.36	0.85	1.12	0.65	2.39	0.52	0.47	1.41	0.49	2.05	1.24	0.94	1.53	1.05	1.76	1.41	0.91	0.56	1.91	1.07	1.13	1.31	0.85	1.03
ENSG00000101224	16.96	25.48	66.14	27.01	12.13	33.89	45.27	39.74	43.46	44.57	59.58	28.52	39.61	33.12	46.94	42.21	25.59	40.37	47.53	46.98	39.41	32.43	40.17	46.25	28.48	32.36	26.13	49.96	32.54	20.84	34.85	45.38	48.96	38.43	41.11	34.16	44.04	43.12	32.41	37.35	53.73	51.74	48.21	33.02	54.98	46.84	53.17	41.62	66.5
ENSG00000125810	1.24	3.46	17.23	4.26	4.43	7.58	8.37	1.97	4.87	2.31	1.33	1.64	6.6	1.44	2.34	0.88	6.15	1.2	2.89	2.2	4.93	2.22	1.02	3.33	0.61	0.7	0	2.4	6.4	0.45	3.71	4.45	0.56	11.43	1.15	0.25	0.72	44.84	19.08	1.8	2.52	0.47	18.25	0	2.39	0	8.38	0.51	0
ENSG00000125827	58.46	90.32	47.77	29.67	42.77	45.23	48.47	63.97	83.63	45.72	65.1	87.39	48.6	49.41	57.23	85.51	91.78	68.63	100.77	67.45	78.13	123.9	123.3	43.51	130.44	61.32	74.16	67.28	70.57	108.83	103.32	78.31	54.87	56.33	80.27	90.45	59.42	52.37	62.42	65.56	47.06	99.41	71.84	83.08	65.54	79.32	41.52	69.38	35.62
ENSG00000125868	733.05	857.85	386.42	650.2	383.44	466.11	443.96	522.95	614.61	465.58	395.01	604.5	523.88	358.96	451.66	622.39	551.71	678.82	752.51	573.57	751.53	617.75	679.13	530.72	577.22	734.45	584.83	773.86	507.05	968.34	841.33	976.49	789.97	800.18	949.41	818.02	652.08	613.98	424.5	499.71	531.52	567.49	1080.92	707.45	590.34	585.31	665.33	510.52	658.96
ENSG00000125869	12.45	23.57	26.89	47.52	39.39	44.37	91.22	58.78	41.66	53.72	34.66	31.03	64.8	81.13	67.21	60.43	121.8	87.57	88.16	88.19	132.94	76.93	83.93	86.7	113.82	94.25	155.12	166.66	211.64	225.05	242.31	129.2	192.01	249.29	178.58	83.5	119.43	193.29	91.99	52.34	102.99	42.18	52.29	95.53	113.29	105.06	192.26	67.02	110.2
ENSG00000125912	25.9	30.6	44.64	27.26	39.72	40.22	23.95	28.65	33.39	49.59	46.72	38.96	29.13	51.65	34.97	36.04	34.7	28.35	30.1	35.98	33.74	34.93	22.77	24.08	31.31	43.92	37.04	26.12	35.52	24.29	38.17	38.21	22.9	33.35	26.72	31.5	38.6	35.7	27.64	44.58	30.32	38.61	31.71	20.3	38.8	25.59	37.54	46.47	18.98
ENSG00000057757	80	95.86	66.73	115.47	52.81	98.94	67.57	102.15	104.14	139.56	132.09	127.83	75.71	158.7	156.58	126.93	129.87	140.02	155.48	139.66	139.11	125.59	138.07	128.26	143.98	171.23	171.02	185.12	148.77	205.34	172.01	232.04	154.43	122.78	191.34	190.26	136.01	173.96	100.88	116.55	113.2	101.77	132.46	158.27	161.93	112.24	142.74	137.92	113.82
ENSG00000257365	20.28	23.03	26.79	20.75	37.34	26.66	29.69	24.3	17.95	35.5	26.21	25.42	24.07	36.25	23.08	26.94	25.76	20.51	24.45	25.01	25.71	24.68	27.5	30.3	32.12	26.58	23.52	22.7	30.37	25.85	23.15	19.89	21.3	24.03	19.21	34.12	24.46	19.39	24.94	21.49	23.1	32.95	14.91	17.87	28.15	21.13	24.98	24.89	14.69
ENSG00000125966	96.42	82.74	63.85	39.46	139.18	26.67	33.75	24.73	34.1	33.72	22.2	16.89	20.39	29.27	39.58	19.65	29.49	29.78	23.45	19.66	20.92	24.77	29.06	22.76	28.94	17.41	26	12.99	33.35	19.3	25.22	23.82	18.48	25.45	16.52	16.81	17.32	16.64	26.46	20.34	42.13	23.71	16.5	13.88	22.69	26.56	22.43	20.5	17.83
ENSG00000125967	5.32	19.99	10.45	20.96	19.54	27.39	41.53	31.63	51.5	53.73	64.36	51.16	55.49	52.41	44.73	47.96	45.37	17.65	51	30.95	32.82	33.88	31.18	25.81	30.74	41.28	34.14	44.34	32.74	26.17	28.64	30.25	65.1	29.2	39.89	32.23	40.5	24.62	29.99	51.93	33.23	81.12	43.82	34.75	30.42	42.94	23.18	47.13	42.03
ENSG00000125970	112.25	110.81	190.62	134.11	129.07	123.76	115.42	98.04	79	104.24	91.22	94.83	88.18	118.81	88.86	60	71.62	88.42	74.54	88.79	63.46	72.13	63.75	88.57	79.97	112.3	94.87	72.44	92.22	78.08	76.39	98.74	109.62	120.95	88.58	95.27	95.46	104.84	86.7	74.74	72.04	94.03	102.64	72.86	81.83	60.28	89.1	80.72	142.79
ENSG00000126003	3.25	4.24	28.14	8.96	3.29	4.38	3.79	5.17	4.04	4.25	4.2	5.13	4.34	3.48	3.45	6.37	5.39	7.07	3.8	5.51	2.88	3.98	4.71	6.57	5.07	3.68	4.39	3.68	6.12	2.66	5.78	2.56	4.05	6.16	5.14	2.26	4.44	3.6	8.67	3.26	6.63	3.97	3.61	9	8.16	2.22	6.88	4.99	2.43
ENSG00000126088	75.45	100.67	89.6	105.13	105.76	160.07	145.87	132.1	110.79	140.37	137.37	115.36	121.31	215.3	133.06	141.6	115.69	120.04	138.4	142.47	137.18	113.76	109.73	127.47	152.15	164.33	202.54	187.47	196.66	164.87	155.17	194.82	228.91	159.09	118.66	163.26	174.62	176.53	107.8	116.16	135.63	142.26	134.67	142.48	165.49	145.24	141.02	100.49	197.24
ENSG00000126226	55.15	39.46	31.16	58	14.13	38.79	46.91	40.02	19.16	27.93	37.93	35.46	30.08	22.51	21.43	37.72	27.37	21.08	35.61	42.81	42.52	31.07	31.32	37.85	28.06	32.18	19.64	44.95	24.69	31.75	28.33	42.78	44.31	24.45	41.37	33.63	35.05	32	35.24	34.34	32.13	36.48	34.88	32.03	50.18	40.28	53.47	31.66	38.09
ENSG00000126243	32.53	38.05	41.92	17.1	63.2	63.55	36.86	53.1	36.7	69.12	57.24	46.28	24	75.49	44.59	42.78	44.08	24.22	40.72	36.29	37.79	24.73	20.48	20.4	29.12	64.25	41.26	31.61	34.44	22.91	40.17	38.09	23.26	31.04	20.54	36.02	36.57	29.49	16.39	60.8	17.21	29.47	27.51	37.34	14.89	23.82	21.47	51.74	34.53
ENSG00000126246	1.17	5.24	21	12.11	2.19	5.17	9.85	8.79	7.28	5.26	9.09	5.26	15.65	4.79	13.29	2.51	7.49	10.2	6.4	18.74	7	1.72	3.64	28.41	5.2	6.96	1.73	12.53	10.75	5.76	8.56	13.44	8.76	10	6.54	8.4	10.98	60.34	32.16	4.48	4.1	8.6	19.19	4.87	10.87	8.63	13.4	5.75	19.26
ENSG00000126247	39.42	49.13	65.25	42.68	62.63	74.52	55.2	78.33	53.19	70.74	71.32	60.06	68.16	94.07	75.03	65.02	77.6	67	82.57	58.94	80.77	67.28	74.88	98.3	79.41	87.89	130.98	89.76	98.58	86.15	87.37	110.89	99.48	96.1	84.86	80.69	83.07	126.25	45.06	65.23	50.21	55.94	63.53	74.87	80.31	39.64	67.24	65.66	70.67
ENSG00000126249	23.25	15.1	23.29	38.74	14.02	28.66	19.95	22.49	15.84	22.71	6.78	18.31	16.68	36.35	16.47	16.03	26.63	10.88	18.71	17.08	18.92	13.22	16.77	14.54	16.27	26.71	23.73	20.41	28.05	20.07	19.39	25.79	19.36	17.06	18	22.38	18.43	23.66	12.86	18.85	15.73	21.58	17.28	12.46	19.99	25.16	17.62	18.41	17.92
ENSG00000126261	77.7	56.36	67.22	93.74	25.32	75.33	86.16	83.32	73.06	43.57	69.19	89.16	68.77	32.62	44.35	74.3	63.24	66.11	77.62	78.54	81.14	85.95	85.85	70.93	60.25	65.18	33.38	81.63	30.23	89.48	60.9	76.74	86.74	36.73	85.08	84.24	78.66	74.97	70.57	77.78	76.35	80.36	91.95	85.5	74.98	80.77	84.02	71.13	80.93
ENSG00000126368	114.16	188.21	91.74	336.24	179.72	288.2	252.1	260.39	152.78	169.59	228.16	90.38	257.29	230.22	181.83	112.63	195.11	200.07	196.77	213.47	109.43	93.24	143.84	327.59	144.9	264.2	271.28	192.33	275.97	182.43	201.48	218.69	244.99	171.8	199.46	142.66	208.24	279.46	178.96	103.17	173.9	155.35	102.88	219.4	219.54	228.32	225.96	176.11	180.09
ENSG00000213465	84.06	131.79	123.04	128.3	207.18	212.02	120.01	143.83	98.31	217.18	119.27	166.73	139.34	284.92	144.84	140.08	124.08	137.5	127.25	200.43	151.01	114.59	132.1	225.08	207.19	279.57	293.55	315.56	246.61	298.04	211.22	330.07	407.59	207.41	275.03	254.82	270.11	316.11	123.4	156.68	113.8	203.72	179.93	89.02	225.47	140.29	166.43	160.82	238.83
ENSG00000126453	1.61	1.35	13.92	3.88	0.38	4.73	5.06	5.48	2	2.7	7.27	2.8	2.86	1.88	4.56	1.72	4.57	3.5	2.51	5.45	2.67	0.79	1.5	1.95	3.57	4.09	0	2.34	2.84	1.76	3.16	7.59	1.64	6.28	3.59	2.4	3.29	6.67	6.43	3.07	2.81	3.17	1.95	0	1.86	5.26	4.08	1.97	3.6
ENSG00000126458	15.98	11.69	87.36	28.79	13.21	36.14	34.43	16.76	19.09	24.81	27	14.09	31.72	30.15	37.46	24.31	30.56	18.73	44.1	30.37	47.34	12.64	16.04	64.56	21.21	15.64	24.43	43.01	47.72	21.49	42.15	61.34	22.55	105.75	19.21	13.21	25.18	66.34	30.91	20.82	46.2	15.96	82.75	15.32	32.06	33.2	60.11	17.35	64.27
ENSG00000105373	232.12	190.44	492.7	205.58	168.86	181.78	111.75	120.69	86.25	131.73	160.86	84.58	117.03	149.34	184.01	81.41	120.15	149.63	146.83	116.27	86.57	64.67	52.03	143.05	74.81	168.73	121.19	178.61	144.78	99.48	129.83	223.58	114.93	207.78	91.9	138.22	136.18	220.71	105.68	103.48	150.31	114.51	141.45	74.72	100.01	125.11	130.63	97.6	171.27
ENSG00000126500	21.14	12.04	36.2	16.21	19.57	24.92	30.44	27.73	40.88	60.38	34.01	61.02	22.01	57.07	51.72	41.14	61.18	37.03	39.5	14.11	48.46	36.71	42.37	11.28	46.6	35.52	35.52	23.64	46.73	34.21	43.26	10.76	17.34	44.23	23.59	36.43	23.11	11.92	20.06	56.43	50.19	31.29	34.11	19.88	16.18	48.63	24.82	47.72	23.24
ENSG00000108788	15.31	19.63	23.66	23.57	18.51	24.49	27.11	22.71	25.73	26.76	19.2	20.64	24.84	25.24	21.69	24.06	24.3	22.86	19.66	22.68	18.53	14.11	16.22	14.55	22.64	18.33	23.85	25.38	19.06	24.59	17.71	22.46	20.19	23.68	21.61	19.35	22.66	28.41	19.04	20.66	16.53	27.44	22.93	11.22	24.53	21.37	17.15	19.34	28.25
ENSG00000126562	0.69	0.64	0.41	0.95	0.11	0.84	4.8	0.78	0.57	1.03	0.89	1.6	0.2	0	0.65	0.49	0.97	2.32	2.14	0.78	0.91	1.01	0.57	0.55	1.13	0.78	0.67	0.44	0.65	1.25	1.67	0.77	1.4	3.25	0.64	1.23	0.67	0.19	0.39	1	0.6	0.65	3.74	2.85	1.19	1.31	0.58	0.56	2.05
ENSG00000213918	19.98	19.68	14.77	15.73	7.11	24.47	18.65	20.75	18.91	12.8	16.59	11.85	8.47	7.78	16.18	10.68	10.81	12.42	11.87	8.76	13.26	10.25	15.96	10.76	7.97	11.29	7	4.62	4.7	7.8	8.55	4.49	9.05	5.41	3.72	7.95	12.81	7.9	13.59	12.99	14.97	10.2	12.69	11.86	14.34	16.35	21.14	9.34	8.53
ENSG00000126602	109.28	130.32	118.54	122.33	143.21	146.53	148.24	129.5	115.36	151.75	140.38	108.06	128.4	201.43	125.54	134.39	137.94	124.17	118.84	135.87	151.05	117.25	128.1	139	156.56	172.68	192.26	163.45	206.67	151.34	140.83	161.76	174.29	175.72	141.51	126.13	140.66	178.97	116.12	147.16	140.65	134.19	148.6	113.5	159.59	143.58	116.3	141.97	140.29
ENSG00000105705	56.26	57.09	61.97	111.67	57.25	90.98	82.28	86.37	64.99	66.13	88.58	54.82	60.08	61.09	64.38	60.14	50.61	66.51	69.87	67.64	60.31	46.72	51.53	75.76	51.15	66.44	67.47	79.78	70.88	66.7	54.11	76.71	99.94	62.22	75.35	62.94	87.56	79.92	55.73	74.45	60.46	60.45	67.99	32.9	78.26	66.16	67.22	66.49	96.49
ENSG00000105671	97.84	105.12	96.61	129.07	155.38	98.71	94.02	86.75	73.1	101.83	86.76	82.21	79.67	129.21	113.74	74.51	98.55	75.15	66.32	59.79	74.72	61.36	60.39	62.52	68.72	84.6	72	52.82	85.75	71.26	57.86	59.5	69.94	78.2	59.95	65.27	54.64	64.24	63.59	68.12	77.68	70.74	68.64	45.16	77.84	84.26	60.1	71.02	85.97
ENSG00000130283	91.95	172.3	172.14	178.03	202.04	500.5	120.05	282.92	174.46	306.54	398.17	131.26	207.87	433.93	436.73	163.38	206.5	230.75	164.73	290.15	100.64	49.88	30.88	246.98	74.73	231.82	128.02	243.92	128.03	52.94	166.21	194.37	64.15	121.91	72.12	134.99	293.79	445.65	72.43	244.38	232.39	123.42	93.44	92.92	72.02	158.63	148.35	248.56	222.73
ENSG00000132581	58.02	35.04	54.05	52.76	40.12	44.35	55.25	41.14	31.72	41.64	50.98	56.67	45.44	65.06	34.54	52.1	37.91	33.67	30.77	52.85	38.52	26.13	40.37	48.76	54.92	47.24	44.41	60.9	57.33	46.91	66.52	20.34	47.3	52.8	38.86	44.33	46.18	44.32	37.14	35.5	42.59	56.32	47.85	28.93	47.08	49.38	57.48	68.36	34.67
ENSG00000126653	16.86	12.66	5.75	34.83	6.53	12.74	29	20.68	21.24	4.05	18.98	17.28	26.14	5.06	8.53	22.4	4.1	39.83	24.04	28	19.82	16.03	19.45	31.52	8.78	14.3	6.38	36.97	5.44	17.89	5.41	18.83	32.39	6.16	28.76	23.86	25.65	31.19	24.77	15.79	34.94	26.91	27.16	10	19.82	22.86	20.49	16.25	30.94
ENSG00000126705	88.12	48.8	52.92	58.04	54.9	34.67	41.6	37.99	44.42	46.87	51.62	37.8	39.43	46.85	36.16	41.63	42.2	42.37	35.21	48.14	37.44	37.47	39.83	58.31	37.89	38	45.58	30.34	45.96	33.28	50.56	42.1	28.62	59.54	32.03	37.87	53.44	49.33	39.42	43.01	36.38	41.3	35.73	29.29	36	39.15	35.17	65.19	31.09
ENSG00000126767	76.51	51.23	72.2	35.14	69.3	57.63	59.52	73.41	75.12	86.33	70.79	52.72	73.13	77.78	98.4	68.67	91.24	102.1	67.04	166.12	60.83	68.45	76.3	137.39	91.73	64.89	91.76	66.1	150.67	89.79	136.45	94.26	62.25	139.02	55.88	72.17	71.32	109.01	159.8	56.25	73.48	68.77	38.38	23.55	161.52	95.86	166.17	81.73	69.14
ENSG00000126775	13.11	17.71	13.04	14.67	9.19	16.46	14.91	16.38	15.61	15	17.64	14.97	13.61	8.93	12	9.05	19.78	15.05	17.03	24.6	16.68	14.44	15.27	12.8	9.96	11.58	8.84	13.8	6.17	9.25	15.65	11.78	14.1	6.6	13.1	14.02	16.62	12.24	19.35	12.23	13.36	19.11	14.57	20.42	17.41	9.38	16.3	9.05	8.16
ENSG00000126821	17.61	38.69	18.78	23.4	24.1	29.59	28.18	37.74	32.83	28.92	30.89	28.21	30.23	10.29	24.96	32.95	42.89	43.8	37.28	40.23	34.24	45.58	43.77	28.46	29.15	21.34	15.74	36.68	15.09	38.49	27.58	32.23	23.08	18.78	39.32	20.28	40.5	25.07	35.23	24.74	24.19	30.53	27.47	52.26	30.63	35	27.96	37.83	5.64
ENSG00000126860	9.32	1.74	3.71	9.27	0	6.85	3.62	5.65	4.5	35.42	42.15	211.55	22.11	6.65	5.14	8.3	5.88	64.6	15.34	69.23	17.19	26.87	15.44	15.06	20.93	82.54	8.38	34.21	5.12	36.77	22.11	25.83	93.56	5.15	87.26	265.15	69.69	36.97	28.4	11.31	19.91	50.26	30.14	12.91	27.01	7.63	40.11	23.51	60.32
ENSG00000126861	40.9	94.21	13.85	84.53	33.66	197.89	154.29	218.91	111.5	83.86	171.17	265.87	200.46	101.25	64.89	162.17	94.95	189.98	119.02	278.3	161.3	166.78	147.16	175.6	115.86	242.29	78.62	171.45	67.64	216.1	126.95	233.79	262.52	39.93	294.01	378.97	216.51	150.53	184.91	129.07	142.99	181.57	111.07	177.53	356.67	142.88	224.08	159.95	102.14
ENSG00000103490	1.37	0	11.48	19.87	3.85	16.15	4.81	8.43	12.8	38.51	11.54	8.9	24.45	9.63	18.49	7.34	19.51	7.97	19.28	7.99	18.24	8.07	4.27	2.22	10.16	8.15	15.16	14.68	12.6	6	11.58	18.52	5.6	28.32	7.67	15.58	12.06	31.93	25.9	24.01	15.61	12.4	40.82	0	12.74	20.23	19.19	10.11	30.78
ENSG00000127184	1111.38	644.58	725.51	1659.56	206.43	2141.24	1014.91	1223.54	853.43	1064.39	860.74	976.92	1087.29	1531.89	1408.82	1276.61	779.51	826.24	931.29	702.3	1021.98	665.8	686.21	1121.11	932.39	2411.91	1056.67	1455.73	1958.47	1240.65	1222.13	1172.89	1538.19	804.85	1070.95	1368.01	965.58	1151.94	639.1	950.36	1140.23	880.47	1255.92	1003.73	1272.37	1372.76	1170.47	872.58	1907.67
ENSG00000054148	263.04	196.8	356.19	566.57	335.84	517.41	363.13	298.03	232.47	340.68	253.72	238.15	260.45	421.9	391.18	217.82	268.38	231.13	251.36	197.44	248.42	159.62	158.82	353.23	224.64	370.74	242.66	392.44	394.82	283.34	264.45	344.72	352.37	231.78	221.23	241.05	232.01	399.86	207.5	277.29	252.55	161	251.64	277.05	285.61	233.46	268.21	256.89	498.08
ENSG00000127220	105.85	130.69	91.34	126.87	172.4	268.95	183.34	249.43	197.67	257.64	328.1	200.01	274.96	422.35	399.77	243.31	266.38	205.5	226.65	288.42	278.25	190.22	188.17	285.75	263.92	333.65	344.47	287.79	361	252.02	297.12	379.95	272.68	295.8	221.95	233.01	236.7	213.86	219.6	254.38	245.45	221.35	158.45	195.73	334.08	306.45	260.34	256.06	383.88
ENSG00000254858	9.1	5.82	6.99	17.02	18.84	21.03	10.02	19.51	11.31	24.79	18.49	16.85	8.1	30.38	14.75	19.46	23.09	6.6	18.26	14.49	19	10.19	11.31	13.66	12.82	25.37	26.8	16.43	9.18	15.63	22.66	17.54	15.9	24.04	13.06	13.2	17.51	36.71	11.15	16.34	7.96	8.81	10.25	21.61	12.06	13.84	16.52	19.15	9.71
ENSG00000127337	32.11	29.63	19.18	13.27	7.5	21.24	28.1	33.93	32.92	10.8	25.93	22.4	20	19.69	19.34	22.31	27.37	24.46	43.83	17.89	36.24	18.08	23.94	22.06	23.75	42.21	10.64	28.09	9.07	38.59	23.46	24.9	32.72	9.13	18.82	27.79	18.79	31.99	15.6	21.05	33.68	19.03	33.11	33.35	27.92	21.02	17.33	17.73	26.38
ENSG00000127364	3.59	2.01	3.22	1.24	0.42	1.32	1.88	2.45	2.23	1.51	1.74	3.13	2.4	0	3.18	0.48	0.64	3.25	2.8	4.78	1.79	3.95	1.12	3.63	0.44	0.76	1.32	8.72	0.63	3.43	1.51	5.45	7.93	0.64	3	5.36	6.3	2.24	4.62	1.47	6.27	4.05	4.9	7.46	2.6	2.2	2.85	2.75	4.02
ENSG00000196453	35.59	31.48	43.86	46.81	42.79	35.44	38.29	37.72	32.37	35.56	37.21	29.35	35.71	45.73	38.29	29.92	37.23	39.9	27.5	30.88	26.64	22.34	23.92	41.57	34.45	34.58	47.86	34.9	44.53	25.45	28.55	33.16	35.61	50.15	29.98	26.08	33.33	37.88	31.25	33.41	37.61	30.68	22.17	25.54	27.01	33.37	30.21	36.93	40.12
ENSG00000127415	19.79	9.87	34.18	13.63	2	12.97	19.85	21.15	16.95	11.7	35.59	8	10	3.12	15.16	11.72	9.88	4.27	19.6	23.06	11.01	13.36	11.96	11.24	4.48	10.89	4.72	11.96	5.28	3.51	11.12	28.13	7.99	7.99	10.45	9.9	19.41	15.99	10.7	16.36	13.09	18.11	18.49	11.11	16.12	9.63	7.13	30.52	10.39
ENSG00000130803	39.4	24.85	32.28	24.3	25.26	14.14	22.45	19.99	16.79	19.01	16.28	20.32	21.2	16.85	26.94	18.36	24.73	18.61	19.29	23.75	22.51	15.25	21.63	17.03	25.29	14.37	21.91	18.7	12.61	17.02	19.05	15.44	19.3	19.87	15.34	22.15	19.3	14.07	25.13	17.27	18.02	26.37	16.11	24.74	23.63	20.99	20.07	23.89	14.37
ENSG00000127452	26.35	17.03	38.35	35.16	9.23	32.07	28.82	27.5	12.79	24	25	18.46	21.25	12.02	14	22	19.3	14.93	23.76	28.72	21.32	14.51	16.88	19.96	15.42	20.25	18.18	32	15.11	11.24	17.58	19.98	27.97	15.8	17.46	13.76	29.87	42.38	21.17	22.49	28.78	21.37	36.45	17.1	22.43	15.5	20.91	22.73	24.6
ENSG00000117245	11.75	36.74	5.92	19.22	63.3	32.92	24.42	27.53	29.42	29.23	26.33	16.28	17.64	42.66	26.8	38.46	28.42	23.44	21.19	37.17	43.87	34.87	38.09	28.18	49.22	30.82	57.01	36.39	53.37	49.13	29.92	48.02	28.18	42.02	43.23	34.4	43.19	23.16	23.71	40.51	12.19	13.88	21.15	30.5	37.66	26.44	13.99	35.37	30.16
ENSG00000127528	9.18	33.36	16.44	25.29	12.87	124.8	173.49	93.85	37.06	64.33	65.22	43.45	85.76	50.92	149.59	44.15	58.66	96.54	89.47	88.93	143.19	24.71	28.51	44.49	29.41	35.03	43.9	35.68	68.01	12.53	33.53	120.67	34.29	215.32	28.17	19.17	34.91	57.15	34.09	47.63	104.27	23.31	475.89	0	37.24	30.04	14.57	59.13	68.55
ENSG00000103145	253.72	368.21	329.63	617.73	467.88	741.72	408.16	524.18	347.75	684.16	514.29	404.39	418.82	790.63	570.96	430.65	396.15	389.18	427.44	404.42	343.32	284.48	277.97	399.06	354.22	606.09	430.46	662.54	456.55	423.22	401.68	504.07	480.26	391.06	432.35	438.17	542.97	493.65	280.04	399.97	304.69	336.67	506.25	337.95	437.82	386.75	472.31	425.47	682.8
ENSG00000197562	73.42	47.47	52.07	48.21	71.3	71.68	74.7	84.47	97.64	108.71	146.01	115.48	90.86	152.75	82.11	101.79	100.22	47.44	118.09	83.93	124.15	85.94	95.51	80.65	96.14	117.72	118.2	89.19	112.54	109.67	110.26	106.75	135.61	102.77	87.71	96.56	100.04	64.77	73.43	128.49	55.15	134.03	52.18	104.85	99.74	87.31	80.14	131.64	66.84
ENSG00000127580	20.18	19.62	27.51	22.36	20.91	19.35	22.42	27.51	15.26	20.17	22.96	20.77	23.42	24.6	25.8	21.57	22.43	15.91	19.16	25.29	16.02	15.68	18.53	20.2	18.17	23.07	34.22	21.32	26.94	18.45	23.18	20.71	19.67	23.08	19.34	21.47	26.96	14.2	20.06	18.93	23.39	19.56	15.96	21.87	27.97	15.8	16.72	24.5	14.42
ENSG00000127666	17.37	19.63	33.82	26.27	28.58	19.71	20.09	17.5	17.12	25.62	25.37	16.93	30.24	27.78	20.6	18.16	18.5	23.28	16.19	26.71	21.31	18.3	20.17	29.29	27.36	33.62	34.46	27.15	34.91	26.2	31.62	26.22	29.5	35.43	20.86	18.93	26.52	27.9	27.19	21.04	20.79	34.1	29.08	7.84	28.23	22.56	25.66	31.51	15.23
ENSG00000103111	29.48	20.88	39.9	16.92	32.6	25.64	30.27	33.83	42.42	32.5	27.93	30.36	34.54	24.96	38.99	21.27	37.68	33.86	32.18	33.56	25.11	32.95	34.49	32.15	27.61	28.75	31.09	21.48	24.27	24.42	37.83	23.19	21.69	19.56	20.29	26.1	25.88	26.51	33.97	25.23	42.08	32.72	28.6	36.74	29.04	34.98	29.33	30.75	21.28
ENSG00000127688	1.49	3.89	5.93	3.08	4.18	1.46	2.78	2.03	0.62	2.23	1.6	1.24	0.88	2.03	0.7	0.8	2.12	5.4	2.71	1.68	1.98	2.67	1.23	3.61	2.2	0.84	2.56	0.48	0	2.98	1.95	0.33	0.34	3.53	1.11	1.19	0.29	0.82	2.84	1.9	3.04	0	0.9	8.25	1.73	1.22	2.21	1.22	0.74
ENSG00000127720	4.9	2.74	0.88	2.03	0.46	5.05	6.87	6.69	1.83	0.82	0.95	3.18	1.75	1.15	1.74	2.1	1.74	2.13	2.68	1.66	3.58	2.16	3.96	3.17	0.97	1.66	0.36	5.24	1.73	3.48	1.65	4.63	4	1.39	5.2	1.17	3.73	3.26	1.96	3.48	3	3.6	4.16	0	5.12	3.21	2.8	3.01	2.93
ENSG00000178982	242.17	267.38	369.25	380.22	243.55	498.78	376.97	478.52	352.84	476.29	458.26	426.97	420.07	662.62	535.74	475.71	425.18	409.31	434.27	348.4	466.82	349.08	348.27	370.49	470.86	658.87	645.95	682.15	729.64	584.91	501.61	596.78	691.49	492.04	496.69	553.28	517.29	545	259.94	443.92	481.31	387.13	559.14	352.39	425.38	495.97	316.17	370.38	697.81
ENSG00000127824	88.74	50.96	47.26	104.91	135.04	437.2	254.81	605.77	479.04	1117.16	719.75	806.72	465.27	1279.12	471.63	818.18	766.07	436.69	600.84	591.72	863.8	815.51	837.06	577.49	1158.65	1182.24	1564.27	895.02	1098.53	864.39	921.68	1067.69	1074.15	860.22	970.04	846.45	882.56	654.6	364.6	910.32	326.47	960.37	678.17	729.85	848.69	485.29	528.89	867.2	495.31
ENSG00000006576	12.67	10.92	2.25	8.49	3.36	4.28	6	5.84	5.96	2.11	3.76	8.36	4.27	2.4	1.7	5.49	2.92	4.97	7.75	6.8	6.59	6.2	5.96	4.43	4.39	4.07	0.25	1.66	3.87	4.12	3.66	6	4.89	1.22	5.16	5.11	4.01	2.84	10.37	2.25	2.1	5.8	6.65	2.85	7.15	6.45	2.83	5.46	3.07
ENSG00000106211	203.87	26.31	1038.74	4483.27	59.84	369.84	266.26	91.77	73.07	120.91	213.62	82.06	440.76	156.46	310.24	127.13	129.01	176.33	181.41	239.33	235.13	79.34	71.45	1011.61	109.52	205.04	174.08	297.19	978.6	133.5	293.81	389.47	152.71	533.31	143.68	123.25	331.19	1399.66	547.46	127.09	219.3	77.45	791.78	179.17	241.64	152.94	1643.28	292.71	478.29
ENSG00000127920	32.74	32.55	45.62	30.07	8.5	85.57	99.34	62	47.46	48.96	25.85	50.76	93.89	55.24	74.76	64.17	72.35	44.86	93.62	49.35	82.12	26.72	31.64	99.95	37.66	95.64	37.48	98.99	115.54	63.6	106.33	139.82	44.49	103.46	62.94	47.78	48.97	135.92	56.14	65.59	219.39	36.96	238.28	45.34	67.48	86.34	67	55.81	353.25
ENSG00000127947	40.14	30.97	18.2	57.86	9.03	27.05	46.06	26.86	23.32	7.71	26.17	23.34	28.78	5.21	11.06	20.26	9.77	26.42	21.45	19.63	24.43	22.75	21.71	32.43	13.92	10.4	3.56	44.07	6.82	15.84	12.95	17.29	15.66	7.4	19.91	18.19	20.23	29.62	30.8	16.45	29.88	17.41	36.52	23.16	21.97	25.55	30.92	16.19	25.54
ENSG00000127951	1.22	2.05	1.1	5.48	0.29	0.9	27.42	3.34	5.32	0.69	3.16	1.22	5.99	1.43	3.9	3.92	6.95	6.66	10.02	1.19	3.66	5.09	3.8	1.48	3.62	7.26	0.45	2.97	13.82	2.01	19.26	5.78	1.25	15.22	1.37	3.65	2.15	7.11	9.79	4.01	12.3	4.14	41.93	12.71	3.9	2	13.6	6.01	3.66
ENSG00000127980	19.4	15.88	5.38	18.93	2.37	7.98	14.39	11.18	11.62	3.5	10	13.47	12.95	1.89	7.36	8.64	5.41	12.06	14.23	15.89	10.89	11.65	11.62	14.18	4.67	8.81	1.36	11.9	3.1	4.92	5.97	13.55	15.85	2.3	15.85	13.37	12.03	13.04	16.1	7.32	13.73	11.21	13.17	9.59	12.32	12.85	11.73	9.07	9.66
ENSG00000128011	41.5	40.17	32.28	16.34	67.3	54.6	18.31	48.26	31.85	55.14	61.06	36.49	33.52	67	42.26	41.57	61.42	27.07	31.27	38.52	27.09	23.56	21.02	32.97	20.97	48.21	42.35	35.92	37.66	28.96	49.39	40.44	16.11	26.28	24.13	32.47	31.84	21.42	22.72	51.25	21.33	34.64	17.77	37.67	24.66	22.26	35.43	53.28	22.4
ENSG00000128045	138.84	76.14	28.7	86.44	74.85	56.91	27.1	94.65	53.08	72.61	67.27	65.86	52.27	70.94	33.11	40.67	114.72	38.74	70.79	64.03	39.88	52.94	48.93	58.25	52.65	56.61	56	41.51	57.47	47.4	42.02	85.51	27.21	28.47	72.26	46.22	28.13	36.57	46.54	63.45	21	21.85	23.48	44.37	71.19	20.76	31.37	39.32	5.98
ENSG00000128159	85.02	66.82	79.87	58.1	27.35	71.98	100.66	77.83	71.76	51.29	107.55	57.67	67.73	29.89	59.46	62.09	42.99	52.63	88.34	97.9	62.5	59.17	65.26	60.24	37.52	61.15	44.39	72.45	48.22	34.53	44.41	82.98	81.19	46.68	70.17	55.8	89.48	66.15	58.38	71.25	69.83	90.31	91.38	26.81	95.97	77.41	67.56	77.3	82.45
ENSG00000128185	62.75	92.66	93.19	144.08	130.81	165.56	127.28	95.42	94.96	156.96	143.44	109.84	157.49	152.21	167.6	98.03	109.69	106.21	129.23	130.95	106.81	69.32	80.97	126.1	106.28	122.8	130.24	170.42	154.42	157.32	127.5	145.36	146.46	141.83	105.95	110.44	144.07	133.57	88.27	107.23	113.89	103.51	103.43	93.58	146.41	134.3	85.82	104.65	240.33
ENSG00000100365	0	1.28	10.29	11.08	0	5.07	10.46	3.13	5	9.66	3.71	2.29	9.2	2.68	6.51	2.46	4.08	5	6.27	3.9	3.05	2.25	4.28	4.64	3.96	2.92	0.85	1.12	1.62	0.63	2.58	3.1	0.78	20.42	1.28	1.37	3.36	8.58	26.92	6.28	11.04	0.65	18.12	4.77	11.32	2.82	13.13	1.41	5.15
ENSG00000100055	0	1.91	12.21	7.98	2.23	3.01	4.29	4.18	7.2	10.7	5.72	2.04	25.47	1.59	10.14	0.73	16.94	4.94	7.44	0.99	3.17	4.34	2.54	1.1	3.02	1.16	1.5	3.31	5.29	0.74	4.98	3.22	4.17	15.99	4.94	2.44	2.39	6.22	28.43	4.47	3.57	2.69	17.36	2.83	4.74	3.9	10.82	3.35	4.07
ENSG00000100031	5.67	2.11	3.95	4.88	1.32	8.68	7.61	3.86	3.52	3.44	3.66	8.47	5.88	3.59	5.02	4.29	1.68	3.43	3.31	9.84	4.7	5.55	4.11	7.25	2.33	4.81	3.13	6.88	4	1.81	4.51	10.51	9.63	3.69	3.95	3.67	8.02	7.06	6.48	4.13	6.19	5.6	6.59	1.96	7.12	8.89	3.3	6.67	13.41
ENSG00000100359	126.55	112.1	88.87	105.79	83.49	124.38	143.69	136.03	134.57	151.75	189.24	134.15	120.21	115.15	158.2	112.99	108.05	102.8	143.04	103.56	118.32	122.29	123.09	114.13	90.66	120.19	97.32	127.13	109.72	80.27	88.18	108.98	133.31	77.84	100.25	83.46	135.37	73.19	92.91	130.25	154.51	124.39	115.27	64.98	108.79	123.74	164.04	136.4	177.01
ENSG00000100095	97.41	143.33	46.86	54.33	177.08	49.28	74.82	50	119.56	123.61	70.83	101.21	56.15	78.99	90.27	90	164.13	94.4	79.04	55.41	89.54	114.3	123.49	21.99	116.06	81.6	88.81	35.26	76.26	71.95	122.57	47.33	46.08	115.79	70.43	80.04	51.7	22.59	78.43	102.55	82.37	102.16	53.33	93.39	52.8	90.69	28.8	104.54	31.81
ENSG00000128228	8.49	10.17	73.87	31.74	11.9	58.83	28.02	32.24	24.11	58.48	36.04	34.44	79.86	48.16	59.3	29.17	30.14	22.87	27.43	11.75	28.98	19.59	22.6	38.21	17.34	36	34.81	33	29.96	21.86	22.49	44.97	35.43	44.83	27.07	39.09	34.07	71.48	18.02	27.16	37.09	30.11	34.57	20.15	23.9	27.79	46.21	29.02	52.53
ENSG00000128245	1521.56	2121.46	616.38	1418.3	1885.89	2018.93	1418.59	2574.63	2285.37	3202.34	2242.1	2686.34	2022.29	2813.42	1999.69	3152.87	3066.16	2409.94	2866.13	2660.83	3506.61	3028.94	3375.72	1661.85	4044.78	3161.24	4399.69	2867.33	3018.47	4044.07	3650.45	3312.17	2123.66	3077.86	3498.11	2932.28	2404.9	2228.78	1855.63	3173.81	1133.56	2249.57	2144.97	3373.45	3235.25	2104.19	2353.4	3161.5	1572.81
ENSG00000128266	374.33	442.29	171.6	164.61	395.05	243.47	157.25	245.39	261.69	287.06	189.08	212.16	161.51	244.22	215.43	195.63	260.48	183.22	173.97	131.16	178.73	192.16	150.35	111.82	191.99	156.48	181.43	128.61	180.93	173.51	160.66	100.45	134.6	152.15	134.63	142.19	121.27	65.3	149.1	199.96	149.37	181.39	127.04	109.96	163.06	167.1	161.36	161.02	158.15
ENSG00000128283	6.98	12.68	94.79	93.73	22.01	29.49	58.62	21.41	10.84	53.79	23.67	94.75	17.08	18.34	19.78	10.26	30.97	35.43	9.52	56.62	19.69	10.25	8.67	31.01	27.52	75.45	19.26	13.56	34.47	20.96	19.61	25.88	56.88	59.53	50.62	129.11	46.96	72.41	34.89	20.01	41.16	34.46	28.56	21.74	25.28	14.28	21.05	20.34	36.48
ENSG00000128285	7	4.27	3.04	7.01	20.52	7.49	4.46	8.68	22.54	44.25	30.02	43.13	19.82	72.11	28.41	45.92	59.21	29.55	40.7	26.21	45.63	41.13	60.5	9.26	68.4	47.5	75.41	43.91	61.99	54.59	70.11	27.03	41.94	49.77	36.58	31.53	28.31	8.45	24.73	59.11	20.58	33.41	29.33	47.59	27.67	38.54	27.48	44.13	21.87
ENSG00000159873	26.92	12.9	15.5	13.25	7.19	7.77	11.44	9.18	11.35	7.55	9.32	16.77	12.83	6.18	10.22	12.33	10.93	11.86	12.75	10.25	12.13	10.83	11.95	11.65	13.27	6.52	7.78	7.48	12.21	8.93	10.27	7.78	9.8	6.15	9.12	8.03	6.19	7.18	10.99	9.98	12.6	11.4	6.41	15.98	15.05	10.23	16.49	12.39	1.44
ENSG00000128534	58.28	40.35	34.81	34.41	7.78	38.76	66.07	47.3	31.04	26.46	17.93	33.19	32.11	27.55	23.6	34.12	23.65	30.2	21.64	24.2	35.01	25.82	25.87	22.43	8.21	25.89	10.21	21.58	15.67	21.23	14.04	35.56	41.48	21.7	29.43	23.19	29.24	41.48	39.65	27.29	41.24	21.93	65.64	23.06	25.74	45.43	31.73	15.33	24.88
ENSG00000128564	40.64	20.04	50.89	45.16	108.44	224.23	99.44	206.17	211.78	262.45	288.57	220.4	53.28	322.35	177.15	202.06	190.27	94.16	122.01	44.46	167.71	101.21	124.9	92.87	117.42	210.52	353.48	296.46	194.32	183.12	161.87	94.59	104.21	155.36	117.07	155.48	279.32	93.98	10.24	362.21	163.1	129.49	133.85	206.98	15.45	118.39	81.32	281.86	113.6
ENSG00000128578	1.93	6.13	9.43	9.99	4.67	9.24	12.64	12.75	18.43	12.11	14.79	14.94	19.51	5.65	15.54	26.54	28.85	9.36	27.91	15.62	20.76	24.15	25.24	7.03	13.67	12.3	10.2	11.28	15.25	14.27	24.64	8.26	10.08	9.17	13.49	10.78	11.89	5.89	25.61	26.77	16.62	22.75	10.36	18.75	13.46	20.84	29.48	19.78	5.3
ENSG00000128590	25.24	35.62	29.43	57.95	8.99	55.66	48.8	50.8	52.27	22.91	44.26	62.29	55.61	28.78	25.55	63.6	46.09	36.62	48.74	47.16	61.44	50.61	68.7	47.58	24.29	55.04	29.19	65.41	27.14	74.19	46.61	57.54	58.79	26.49	64.39	65.28	47.83	60.87	50.83	42.02	42.02	59.01	58.31	54.92	48.76	51.15	48.08	61.95	35.91
ENSG00000128594	65.45	90.69	37.36	72.59	113.87	104.39	136.32	136.95	164.95	150.26	153.72	156.31	120.52	169.96	170.94	169.86	191.78	128.4	125.2	123.05	195.4	178.57	196.42	120.74	226.26	197.24	239.02	150.82	179.25	181.25	187.17	145.99	181.78	156.57	142.2	165.37	123.59	72.79	124.69	172.72	128.8	210.95	99.36	143.65	136.48	160.69	108.23	152.82	115.6
ENSG00000128602	7.86	5.54	31.83	12.94	7.98	12.05	14.83	9.08	3.4	5.36	7.73	2.89	12.16	3.59	7.26	4.02	4.85	8.18	7.46	9.1	2.72	3.35	1.49	14.08	3.54	2.9	5.03	9.96	7.72	2.99	7.1	6.22	2.79	12.87	3.62	1.43	7.8	12.48	12.3	2.24	11.05	3.09	8.91	7.1	9.31	8.11	14.75	3.14	4.08
ENSG00000128617	3.86	7.76	1.38	9.56	3.6	3.4	16.2	10.52	5.75	6.06	7.48	6.15	7.55	2.7	3.28	7.42	2.19	1.12	8.42	6.73	16.9	9.44	7.19	7.48	4.56	3.27	2.84	7.5	5.99	8.43	4.77	8.84	6.29	2.19	12.91	3.68	5.42	10.25	5.29	8.85	3.37	6.53	5.15	0	10.73	5.68	9.8	7.1	5.76
ENSG00000128654	108.09	106.63	33.49	165.08	39.55	200.89	161.35	182.14	93.13	100.06	106.07	133.14	114.34	88.14	76.6	125.91	94.15	76.19	124.85	91.4	145.56	104.85	105.81	102.17	113.61	121.07	85.55	135.77	78.45	174.36	111.76	134.76	169.04	50.75	161.62	149.74	118.77	87.2	70.52	101.4	96.25	116.26	144.72	165.22	122.35	107.66	144.42	107	100.54
ENSG00000092531	19.05	14.91	22.75	26.24	4.15	15.87	32.9	19.05	15.78	12.1	15.59	10.76	31.64	0.74	15.3	14.93	9.92	22.11	10.89	20.3	14.33	10.57	13.41	25.65	8.76	9.69	3.74	14.81	3.58	6.24	11.42	9.42	12.94	13.54	17.01	10.61	16.35	18.98	28.3	15.96	4.44	15.05	26.95	15.83	16.93	13.51	39.52	11.69	18.97
ENSG00000128872	94.07	104.77	13.7	39.51	86.84	30.36	49.8	46.4	133.52	30.88	34.59	44.21	67.38	31.27	48.78	58.46	50.52	88.22	77.54	72.62	44.18	128.44	135.43	60.56	61.08	27.24	24.77	39.39	30.77	61	44.28	36.1	33.77	36.97	46.52	55.24	51.48	20.32	100.97	38.02	76.2	66.91	36.18	139.81	40.78	73.86	34.48	49.28	41.13
ENSG00000128917	13.34	3.29	9.37	21.09	2.2	15.87	12.64	10.43	8.29	8.14	13.18	5.48	18.86	4.81	5.28	7.55	12.54	4.55	11.63	3.42	21.62	4.61	5.61	10.46	6.38	9.32	7.51	6.48	4.71	3.22	9.93	6.09	6.93	16.74	3.72	4.45	7.81	10.43	16.6	5.15	12.69	5.09	66.16	6.52	5.23	4.5	8.47	6.74	6.45
ENSG00000129009	3.14	3.51	1.12	5.62	6.45	2.31	75.57	2.57	3.51	13.37	9.33	13.13	2.79	9.89	2.22	6.71	14.26	9.56	37.68	22.8	12.08	16.28	14.43	8.11	19.18	28.21	16.63	7.93	41.19	19.2	49.73	24.54	58.41	223.52	31.52	53.57	31.59	12.5	5.38	10.63	9.32	23.73	118.36	5.21	25.46	3.59	3.19	29.27	7.5
ENSG00000129028	13.57	9.34	7.48	18.69	3.9	10.74	9.5	9.25	15.56	11.7	8.76	13	14.86	7.31	10.35	8.92	8.15	13.63	14.65	21.74	11.08	12.77	11.02	13.49	8.74	21.24	15.36	18.25	7.36	18.81	8.8	28.85	28.36	2.23	14.56	15.57	23.21	18.19	23.26	9.12	16.42	20.02	15.82	26.01	17.54	10.25	21.21	12.17	14.03
ENSG00000129083	38.1	21.78	14.16	30.71	10.42	21.16	34.18	25.39	19.29	10.13	22.79	25.87	25.11	9.39	11.6	22.17	14.63	20.47	22.67	21.33	21.73	22.8	22.44	26.45	14.19	16.75	7.27	22.21	7.97	21.89	13.48	21.31	23.2	7.22	20.79	21.22	19.16	27.18	28.22	19.58	20.72	21.18	29.44	26.96	24.86	25.63	25.09	19.57	21.5
ENSG00000129194	119.47	101.54	77.05	227.15	87.09	147.54	133.83	107.51	68.29	66.99	55.58	28.58	55.29	72.56	101.6	91.96	81.46	107.47	37.27	69.46	38.07	49.14	47.51	77.23	73.03	72.95	87.93	148.62	87.69	96.59	91.32	74.11	129.87	81.54	72.01	94.14	139.85	166.64	81.94	65.27	121.12	102.49	72.46	59.56	99.72	86.04	115.33	67.45	92.81
ENSG00000167840	21.17	20.3	34.32	26.26	7.92	17.34	17.37	16.91	12.4	8.82	11.73	9.04	12.92	8.13	11.15	10.35	15.47	10.53	14.63	13.48	13.66	11.26	6.77	8.8	11.93	11.29	7.57	21.17	8.97	14.54	14.96	12.24	23.02	8.6	19.24	16.25	12.04	7.53	11.06	10.25	15.86	18.44	14.31	2.51	15.08	16.34	11.91	14.85	17.17
ENSG00000129226	20.48	26.71	169.82	116.5	18.78	23.97	15.93	17.58	35.81	38.69	15.68	10.2	68.83	14.61	63.41	9.32	58.17	33.01	14.19	13.23	23.66	27.1	10.84	13.48	24.3	8.36	18.98	25.06	63.69	19.47	26.85	26.08	13.91	181.15	13.12	23.54	15.53	142.29	147.79	31.07	34.46	18.4	93.82	9.45	31.21	27.93	118.47	16.75	23.79
ENSG00000129235	58.62	35.2	68.71	77.77	19.27	108.52	60.8	81.4	52.6	77.91	77.15	90.88	79.21	79.88	78.46	82.39	60.14	31.5	47.41	41.02	57.66	31.89	43.16	43.86	57.79	92.06	59.12	69.63	72.02	45.07	46.37	39.52	76.7	37.04	38.77	49.25	52.1	43.26	34.74	81.84	72.1	51.46	85.58	63.14	71.73	67.52	67.56	42.63	84.32
ENSG00000129244	163.31	350.87	373.54	330	409.29	467.07	692.26	453.43	201.08	120.43	253.86	73.98	1030.51	365.31	410.31	239.12	257.98	455.92	115.78	311.2	107.11	109.03	54.73	770.15	199.07	76.38	359.1	285.68	410.74	122.74	187.47	49.38	54.47	346.2	99.98	49.04	273.42	1055.1	740.44	177.9	484.41	63.12	147.06	670.24	215.14	304.56	432.45	198.6	217.34
ENSG00000129245	69.1	66.33	113.78	81.17	110.49	80.45	79.14	93.13	86.36	119.37	98.06	117.43	95.97	152.79	119.45	106.11	125.39	110.98	106.53	117.66	116.15	110.3	114.16	106.18	150.04	127.37	187.84	119.95	146.31	157.76	138.29	132.5	154.13	154.2	121.93	147.59	138.16	118.39	86.97	109.76	104.03	107.98	96.41	112.84	127.57	94.8	92.59	114.95	97.26
ENSG00000129282	10.87	6.95	8.35	12.84	7.98	18.27	13.05	13.76	8.68	8.71	15.05	10.84	6.91	7.26	7.7	4.98	7.72	5.63	13.32	12.79	13.4	6.08	10.61	13.8	13.02	9.22	14.86	18.11	7.67	10.18	9.6	7.33	17.94	7.73	12.13	10.2	17.27	9.03	13.31	9.33	10.86	8.77	9.42	6.45	25.21	11.44	6.9	11.44	18.56
ENSG00000213339	128.85	141.12	101.54	164.71	58.35	201.14	262.27	225.49	146.07	112.47	275.49	119.15	154.85	74.47	110.14	124.96	101.89	123.34	163.67	169.9	126.11	109.91	116.37	188.91	76.62	117.16	57.68	229.79	103.13	66.76	69.43	191.67	250.88	83.11	150.49	114.18	202.14	224.98	118.43	137.16	192.72	163.44	175.62	44.15	214.05	159.8	188.12	166.28	279.79
ENSG00000105472	14.96	9.76	13.89	24.04	12.42	29.32	26.18	27.19	13.94	25.62	23.62	18.63	15.53	30.09	32.97	13.77	21.24	10.25	23.98	23.35	16	5.7	7.23	11.41	12.29	20.44	17.12	27.45	15.83	12.71	19.15	30.81	28.22	30.72	17.62	22.82	27.72	26.21	8.55	29.96	14.52	14.07	28.22	10.36	17.34	6.8	14.25	19.38	26.07
ENSG00000129484	87.13	90.22	26.7	81.29	33.39	82.34	82.95	93.65	69.88	51.7	78.92	76.73	53.74	36.34	37.89	85.99	51.07	54.51	80.17	85.76	84.78	82.83	61.29	78.22	55.9	69.98	43.42	78.4	28.96	75.04	59.33	137.07	112.43	39	102.13	91.36	77.97	102.57	67.97	74.3	55.6	93.4	74.37	57.45	106.88	64.89	71.72	82.6	75.06
ENSG00000129521	5.61	10.04	29.47	32.45	11.53	37.1	28.27	16.82	12.54	25.16	37.69	26.27	79.86	22.27	27.03	15.59	23.9	58.59	23.62	45.11	11.17	4.94	9.06	29.91	29.31	15.22	27.24	37.06	38	20.83	32.78	10.59	19.81	20.73	22.54	24.1	35.45	34.46	48.72	12.87	64.7	16.46	23.13	37.28	26.01	49.57	34.19	19.27	40.22
ENSG00000129559	393.98	387.34	362.7	517.91	323.69	707.08	466.61	572.97	526.24	618.53	362.71	500.62	581.4	786.1	565.35	642.26	501.32	464.42	535.1	469.22	586.33	459.72	520.15	525.25	615.01	776.82	855.33	883.8	806.34	746.1	695.66	670.74	789.57	669.89	613.79	593.8	618.72	613.29	367.76	624.19	499.26	444.7	637.15	300.07	650.82	534.68	487.88	517.75	730.75
ENSG00000129562	170.03	122.8	344.1	263.54	152.28	326.34	214.94	201.24	127.64	215.83	155.62	242.42	283.7	350.3	247.68	230.99	218.03	191.87	204.42	177.34	188.14	175.75	120.31	242.33	253.78	252.34	196.39	250.15	376.67	210.28	313.24	197.44	253.49	275.34	204.27	265.01	212.85	294.09	176.8	245.13	239.41	141.28	256.36	156.97	231.33	235.78	355.43	184.04	306.91
ENSG00000129596	81.7	57.67	146.37	80.27	24.41	73.84	66.58	60.26	69.9	64.59	64.9	68.75	75.09	35.2	60.75	67.29	78.95	80.64	96.09	107.07	75.58	63.61	76.56	94.15	73.95	76.1	51.26	68.99	37.81	90	99.37	91.21	75.52	45.71	91.94	109.53	70.55	72.28	72.72	78.3	119.4	66.52	71.48	44.52	93.16	92.07	94.41	67.39	70.03
ENSG00000127314	18.92	15.46	7.82	17.04	2.04	8.56	19.36	17.86	8.14	6.53	10.34	7.98	11.65	1.7	3.09	6.22	5.17	8.45	9.08	10.58	9.66	11.4	3.62	9.41	2.15	6.17	1.07	4.24	1.03	5.56	8.18	3.92	2.97	4.14	4.06	6.08	7.67	12.08	9.98	3.98	10.17	6.57	20.3	6.05	7.59	5.95	11.09	3.57	8.7
ENSG00000129675	3.7	13.44	17	22.67	7.6	10.6	19.94	8.82	10.34	7.05	5.97	8.11	13.16	3.02	11.27	5.34	8.14	18.78	9.81	14.69	4.66	9.41	9.88	11.35	8.39	4.39	5.99	4.31	4.44	11.31	8.73	5.98	6.28	8.68	9.49	8.39	8.44	8.6	23.46	6.26	12.6	7.72	12.11	15.36	11.57	13.62	24.66	5.9	9.39
ENSG00000138834	176.38	161.03	131.69	106.87	241.47	139.2	148.04	162.86	201.35	251.81	221.91	204.98	153.29	237.1	204.08	192.85	227.97	203.97	162	274.75	219.13	256.04	264.03	214.19	256.17	255.78	316.85	150.56	314.92	226.41	237.81	250.51	234.75	276.32	228.64	223.87	280.11	199.02	195	246.26	180.3	235.54	172.65	169.7	201.6	158.02	205.16	265.71	143.61
ENSG00000099875	40.11	34.02	56.57	129.09	35.22	57.43	47.93	51.85	37.37	52.34	46.46	33.42	76.92	63	71.54	32.89	36.34	42.14	33.43	39.87	34.89	27.42	30.5	98.33	24.2	45.74	47.84	36.29	66.86	24.18	49.36	38.23	30.06	54.08	26.24	33.85	48.16	71.19	35.17	32.11	56.81	51.12	67.1	34.47	48.5	43.01	142.72	37.34	43.38
ENSG00000129968	50.57	74.02	110.14	107.58	102.16	220.3	90.6	186.57	137.22	239.35	225.34	116.74	127.73	202.39	298.29	102.16	163.21	158.07	128.17	111.33	97.27	102.32	58.22	182.07	86.15	199.3	128.62	150.33	124.39	82.07	104.91	161.46	117.72	132.71	73.46	151.38	166.7	150.04	65.03	145.45	141.69	122.14	101.93	86.51	85.35	169.8	105.32	137.36	203.3
ENSG00000103449	4.97	11.35	37.6	13.27	9.49	13.7	29.59	13.56	12.48	13.71	10.57	22.19	24.7	6.9	19.96	8.97	15.74	22.09	10.98	21.48	10.45	11.16	3.99	26.11	10.93	8.08	7.16	10.47	5.7	9.51	10.01	4.05	10.41	11.49	11.44	18.42	15.28	18.23	36.94	10.52	37.47	12.63	13.19	18.93	14.77	26.95	31.44	7.25	10.83
ENSG00000100722	49.68	33.29	20.5	35.48	17.07	25.24	41.43	35.61	27.01	16.59	31.39	31.49	29.91	12.8	20.71	30.07	20.24	34.98	33.61	33.27	29.83	34.16	34.27	32.47	23.77	22.92	9.14	22.36	12.63	30.13	21.35	32.51	25.56	14.02	28.13	23.77	26.3	26.99	34.65	28.34	33.52	42.47	34.12	31.87	32.39	31.39	32.48	33.85	21.28
ENSG00000074695	16.86	12.08	8.81	12.7	5.42	5.42	9.96	5.03	12.11	5.61	8.17	7.88	12.66	3.69	6.35	8.45	6.36	18.34	10.27	18.12	11.19	14.19	14.4	14.9	8.05	5.81	1.55	5.12	4.83	9.21	7.4	13.85	6.8	7.12	8.82	12.58	12.03	13.56	19.27	5.76	19.34	10.7	15.98	4.38	7.63	6.47	18.4	8.73	4.72
ENSG00000110888	57.04	49.64	12.83	50.14	7.03	48.77	54.14	61.99	54.42	20.34	59.52	44.36	53.31	11.99	20.46	44.39	20	36.01	59.56	56.31	56.09	55.39	55.31	50.33	24.12	30.36	9.48	58.22	9.77	20.47	25.89	56.97	61.29	9.33	59.67	43.74	53.64	45.77	44.33	53.46	40.47	45.12	56.59	20.82	62.94	51.76	60.17	49.79	38.5
ENSG00000013523	14.53	29.7	25.76	12.82	7.64	19.02	18.75	16.09	20.87	30.04	21.12	25.34	31.11	15.11	28.63	20.38	28.7	29.97	29.74	45.75	20.19	28.01	30.18	21.64	27.53	16.94	25.06	22.94	34.92	17.61	24.75	18.37	16.65	23.56	26.35	27.1	22.05	10.18	38.92	15.63	36.11	22.04	22.03	37.72	36.31	21.18	17.3	28.42	19.67
ENSG00000132199	1.33	3.71	3.17	2.29	0.31	5.86	14.42	3.17	3.3	5.96	5.58	8.27	7.09	0.39	5.18	4.26	2.36	9.15	3.63	8.69	3.09	3.58	4.54	5.37	0.33	3.94	2.44	5.16	2.81	2.18	4.11	8.96	4.96	4.72	15.2	6.74	6.22	7.17	11.77	2.18	9.87	3.75	12.08	5.52	6.16	3.26	4.22	4.89	12.9
ENSG00000102543	9.99	14.12	7.02	30.75	5.21	18.13	17.68	19.62	16.79	11.2	14.8	18.15	22.48	11.32	13.74	17.9	10.43	13.21	16.95	17.64	23.01	16.97	14.6	14.71	16.79	20.92	10.81	21.12	13.68	20.86	16.84	20.2	18.36	10.86	20.65	17.53	14.78	11.22	14.77	16.04	20.02	19.56	22.09	24.4	19.75	24.52	14.17	11.53	16.67
ENSG00000102452	12.75	24.33	2.76	11.09	22.79	14.88	19.3	22.05	38.91	21.62	26.77	34.94	17.3	15.26	18.18	30.32	31.12	28.21	31.07	32.89	32.9	48.14	44.06	17.38	34.09	23.38	16.89	23.85	13.83	33.87	24.18	26.54	17.86	16.43	33.44	31.2	25.56	14.16	27.32	29.95	25.21	36.25	25.71	37.74	27.34	23.21	17.61	30.61	14.28
ENSG00000103426	60.71	55.16	72.7	32.27	74.46	31.28	33.26	34.41	38.94	48.1	38.37	36.83	25.25	38.34	43.02	29.1	40.77	27.52	29.59	32.93	35.26	29.56	26.24	26.66	33.18	56.24	48.07	33.34	34.46	31.18	24.29	45.82	66.34	38.94	38.3	37.81	38.43	46.02	39.03	36.95	31.43	62.75	37.02	34.27	31.36	24.57	14.46	34.62	43.86
ENSG00000108406	44.9	39.89	27.41	53.61	10.26	30.8	29.34	25.85	27.58	11.47	24.82	29.33	26.64	10.78	20.86	27.2	16.65	28.23	27.23	27.31	23.85	25.65	22.32	20.96	19.67	24.54	9.55	27.15	9.51	25.89	13.74	22.2	22.03	7.09	27.28	27.69	25.11	16.98	38.77	24.53	39.67	31.81	30.25	18.65	30.94	30.21	33.9	22.65	26.83
ENSG00000105429	55.24	126.89	75.3	32.13	216.05	59.17	60.86	72.42	91.91	104.28	71.2	71.84	66	108.94	97	73.87	103.59	61.14	56.58	69.66	72.41	85.96	79.52	46.93	82.49	71.16	76.58	38.79	83.05	64.54	80.71	53.38	39.78	88.37	55.43	65.16	62.62	34.56	59.52	85.01	69.2	84.89	49.11	55.02	63.16	76.02	53.59	78.54	48.47
ENSG00000159905	3.05	1.46	2.08	3	2.65	1.28	2.13	1.78	3.25	1.22	1.13	2.6	0.39	0.76	0.93	1.86	0.93	6	2.38	2.53	0.58	2.13	2.98	2.11	2.58	0.74	1.92	0.42	1.54	1.67	1.22	1.76	0.59	0.31	1.46	1.04	1.78	0.36	3.24	1.19	2.67	2.95	2.11	7.24	2.02	2.5	2.49	1.6	0
ENSG00000159885	10.82	8.32	7.27	18.17	1.26	10.94	8.52	14.76	7.56	5.69	15.3	14.16	12.04	1.58	4.79	10.48	6.25	7.85	11.61	11.47	7.63	9.94	16.39	8.2	3.33	10.33	1.49	16.43	4.77	8.13	7.6	12.31	13.33	2.4	10.95	10.5	10.69	12.35	11.98	8.5	10.05	11.45	14.36	8.43	10.59	16.05	11.6	10.79	14.15
ENSG00000099822	77.45	103.1	41.84	63.51	201.62	130.12	113.61	123.19	151.22	225.39	128.66	147.02	216.6	211.06	261.34	137.98	165.01	200.64	109.29	116.13	178.73	137.23	176.43	184.75	243.61	243.95	415.25	89.6	205.62	205.49	188.62	144.22	333.22	262.19	166.71	156.3	194.26	116.35	141.21	163.2	170.82	195.65	93.94	107.25	119.71	211.27	161.6	165.2	242.4
ENSG00000065268	57.14	59.58	82.07	50.53	102.46	114.65	63.25	117.91	68.6	79.23	125.21	75.41	79.7	119.04	90.28	54.89	75.13	51.53	67.44	74.07	50.75	50.66	43.17	46.79	44.53	92.33	60.8	95.3	68.66	41.76	54.68	90.07	74.49	65.32	39.21	56.69	83.15	90.39	46.77	90.27	55.33	78	64.62	25.66	71.61	40.44	48.05	91.44	91.12
ENSG00000117154	208.24	294.63	75.57	277.39	346.74	515.86	282.73	256.08	205.5	332.22	292.86	282.64	198.62	299.66	228.69	245.05	199.78	141.46	145.8	147.71	214.63	201.37	180.84	144.55	196.23	213.19	285.34	185.04	228.16	195.78	158.1	166.78	236.83	170.54	162.76	181.99	193.92	148.53	134.79	268.07	148.81	259.73	141.29	100.37	170.38	187.84	147.22	261.92	212.25
ENSG00000132207	15.14	14.82	25.62	19.99	4.13	21.33	16.79	12.9	18.82	12.74	22.83	18.24	29.2	8.11	20.57	9.44	15.24	10.07	11.81	30.57	14.24	11.12	12.54	21.41	8.09	8.56	8.36	19.62	8.02	7.58	4.26	17.87	13.72	10.77	24.65	15.07	23.63	19.91	19.47	19.99	14.34	20.65	22.19	0	29.26	19.62	26.45	23.23	13.2
ENSG00000108272	8.25	24.22	10.47	31.97	15.42	34.88	30.33	29.53	23.07	27.18	33.99	31.87	35.8	24.1	29.97	20.95	26.37	17.21	28.15	17.99	32.19	28.28	25.63	28.34	17.8	28.87	35.68	19.05	21.11	30.43	27.83	36.16	35.04	31.53	29.36	20.93	47.69	41.96	18.86	25.36	29.75	37.26	17.52	21.43	20.33	23.64	8.52	24.05	40.06
ENSG00000100441	9.91	13.75	45.22	11.74	7.23	7.58	17.21	9.46	6.65	9.11	13.83	11.26	12.35	6.25	14.05	8.69	7.6	8.92	9.89	12.87	6.58	6.21	6.65	19.54	7.43	5.72	5.25	8.48	9.23	7.36	9.58	9.09	6.73	10.71	10.84	9.23	17.87	15.8	19.94	7.8	17.33	7.61	18.52	3.29	12.18	12.65	20.4	10.22	8.88
ENSG00000090661	93.37	76.98	75.3	83.57	93.63	114.72	88.28	95.71	86.38	98.21	93.79	102.57	95.22	109.06	90.32	68.12	108.91	86.03	63.25	85.85	87.78	81.75	71.14	85.91	84.33	103.46	71.73	96.04	90.43	67.76	75.08	72.61	74.08	80.44	92.05	107.4	79.78	82.61	77.9	81.55	82.2	65.39	58.69	50.97	84.54	83.67	108.64	74.86	84.5
ENSG00000037042	82.8	86.03	40.96	148.99	96.44	202.13	186.03	212.32	176.21	214.12	193.63	150.88	154.52	222.3	180.41	181.33	154.92	147.93	164.81	157.17	186.25	141.29	149.35	143.8	162.67	171.36	200.55	220.39	168.78	165.75	156.64	202.07	263.64	132.24	165.53	135	178.66	159.55	112.3	178.93	180.38	159.03	163.39	107.82	166.55	227.57	143.24	146.74	255.69
ENSG00000131462	29.78	37.63	38.06	41.44	64.29	72.24	56.3	59.28	35.52	43.75	41.56	46.3	41.87	76.87	32.08	46.48	42.72	28.52	30.66	38.38	46.26	40.24	48.48	44.76	56.67	42.93	66.63	43.41	51.7	51.41	45.86	48.59	63.12	41.92	45.54	35.2	46.36	41.04	22.81	55.64	27.07	38.99	44.43	27.22	44.19	33.63	43.12	45.69	32.92
ENSG00000105613	321.52	275.97	170.72	143.74	231.08	124.26	152.84	153.38	164.38	138.09	187.42	113.72	99.34	92.08	118.75	114.04	119.89	107.37	130.48	144.74	115.52	130.52	128.56	118	103.35	101.39	132.25	95.5	89.61	70.45	86.53	115.15	127.63	85.7	121	86.28	128.35	64.53	123.63	147.67	111.62	130.33	109.58	83.29	172.88	93.58	210.63	135.78	83.19
ENSG00000105520	222.8	344.67	168.53	236.61	582.12	281.14	194.98	279.73	224.93	343.54	212.32	206.32	128.87	293.84	239.46	203.44	305.92	189.91	172.3	121.43	173.8	142.72	121.12	108.01	163.83	146.43	148.94	108.26	238.48	108.53	147.14	96.39	60.54	159.72	97.4	114.15	109.75	86.32	151.73	245.47	163.89	151.94	136.25	84.85	130.22	165.62	103.76	201.66	124.81
ENSG00000109805	5.28	6.37	4.48	6.89	1.69	3.27	3.5	3.41	2.42	0.16	0.9	1.66	0.74	0.49	0.59	0.59	0.39	0.81	2.17	0.67	0.55	0.95	0.86	1.12	0.68	0.24	0	1.08	0.2	0.61	0.78	1.12	0.75	0.4	1.09	0.83	0.81	1.61	1.75	0.76	1.94	0.63	1.18	0	1.77	1.14	1.94	1.36	2.91
ENSG00000108839	1.75	2.93	5.74	2.71	1.02	3.53	2.14	2.98	1.9	0.74	1.98	2.4	2.72	1.02	4.34	0.7	2.79	1.9	1.36	2.33	1.45	1.28	1.63	2.12	1.29	2.97	0.64	2.55	2.78	0.95	1.72	1.77	1.78	0.31	1.71	3.65	1.02	3.63	3.5	1.67	2.67	2.22	2.92	3.63	2.53	1.07	4.16	2.95	1.31
ENSG00000087116	2.31	2.32	6.62	2.86	3.67	0.85	4.69	0.94	2.3	2.33	2.09	0.92	1.85	1.62	1.15	1.36	2.46	2.85	2.16	4.48	2.15	0.68	1.29	2.05	3.19	1.96	1.7	2.24	7.33	2.78	6.1	6.23	3.29	7.88	2.58	3.86	3.24	5.75	3.3	2.02	2.02	1.43	4.06	0.96	2.14	4.54	3.67	3.12	2.07
ENSG00000103245	58.76	44.7	40.4	65.43	63.22	61.27	71.28	86.64	47.97	60.92	80.79	58.56	49.86	82.2	50.36	53.69	59.69	42.13	61.28	84.74	70.31	44.49	48.82	60.18	66.02	63.74	64.37	63.75	59.8	51.88	50.31	63.58	77.52	47.61	54.91	48.54	76.38	61.83	49.2	61.22	53.15	61.32	53.04	31.23	78.42	54.24	71.16	56.6	71.45
ENSG00000072756	23.52	22.49	3.33	15.77	8.1	26.84	22.96	24.05	22.3	5.21	19.19	20.97	18.17	3.25	7.46	20.51	10.55	11.22	18.82	15.59	22.19	20	19.23	16	12.81	17.85	5.92	14.43	5.68	10.14	9.39	12.94	16.4	3.52	16.92	15.89	13.76	13.87	14.5	14.54	18.93	15.72	19.52	15.43	15.07	14.18	17.69	11.01	12.94
ENSG00000104213	0	0.8	4.28	5.92	1.34	3.16	9.02	0.98	1.78	1.61	2.78	1.78	5.1	2.93	2.03	1.91	6.1	3.64	6.7	6.94	4.28	3.51	1.33	6.36	1.41	3.04	2.63	6.26	8.09	3.13	7.65	2.41	2.92	14.25	2.4	2.14	1.26	7.13	4.09	2.35	5.63	3.23	14.76	0	7.89	7.03	9.09	1.76	7.49
ENSG00000067248	15.92	8.24	2.7	28.7	3.67	9.97	16.92	13.4	9.52	2.64	11.17	11.55	9.62	1.95	3.9	9.66	3.49	8.41	9.5	10.28	11.61	9.14	9.89	10.48	4.84	5.67	1.74	9.36	3.88	7.3	4.2	11	13.62	2.93	11.84	9.5	11.85	9.46	13.48	7.19	10.99	9.65	10.25	8.98	9.57	9.97	11.36	7.6	11.45
ENSG00000108771	0	3.66	7.3	10.52	2.85	8.02	12.83	8.92	7.59	8.32	10.43	5.87	11.65	7.64	13.3	6.53	6.51	6.33	9.53	16.91	6.66	3.2	2.44	9.87	6.02	5.55	4.5	11.87	8.31	3.34	6.87	8.53	8.6	10.24	7.55	5.21	10.47	18.11	15.21	6.2	30.89	7.14	11.64	5.44	10.88	18.57	8.31	8.03	13.04
ENSG00000112379	15.45	9.61	2.95	4.43	14.9	5.09	4.24	4.04	18.81	9.63	6.95	12.01	4.62	6.57	8.23	7.93	17.82	10.58	9.74	10	9.6	16.4	17.28	3.5	11.76	5.45	5.37	3.24	6.72	7.29	12.92	4.25	2.35	8.26	5.31	7.6	5.86	1.74	13.07	6.96	7.24	8.16	5.32	32.87	5.73	10.42	4.63	8.95	2.4
ENSG00000114520	56.41	53.43	19.42	49.37	17.06	34.63	41.35	27.6	46.59	20.09	34.3	39.68	33.07	15.5	16.93	35.47	23.57	21.18	48.65	31.51	37.01	49.71	42.06	20.38	21.26	23.64	11.72	49.66	10.3	45.32	23.13	26.85	28.4	8.96	33.7	34.86	38.06	32.51	38.69	32.27	31.9	36.71	52.32	52.38	34.24	30.96	14.33	34.21	24.78
ENSG00000042429	42.53	24.01	23.18	52.05	12.54	25.8	22.55	22.8	16.67	13.2	19.74	17.9	23.88	8.92	11.41	18.54	16.72	14.38	18.03	23.6	14.25	10.31	20.78	21.02	10.18	21.36	12.15	20.06	11.37	20.3	19.49	16.7	21.6	7.05	21.2	19.72	24.41	16.45	21.47	15.57	20.21	18.64	23.54	13.72	18.43	26.7	20.19	16.22	20.35
ENSG00000102098	11.3	3.64	4.15	3.29	0.61	0.64	3.65	0.89	1.89	1.95	1.12	1.08	0.77	0.25	0.92	0.93	2.16	0.63	1.36	1.47	0.58	1.49	0.54	1.05	0	0.74	0.32	0.84	0.31	0.47	0.98	0.59	0.3	0.31	2.67	0.78	1.78	0.72	3.23	0.71	1.52	1.23	1.58	0	0.76	1.42	1.1	1.07	0.65
ENSG00000074319	88.54	75.34	67.13	90.69	42.09	75.27	86.25	59.31	51.18	52.67	54.22	60.24	59.61	47.21	53.47	60.91	62.34	54.73	61.24	54.46	56.74	45.61	44.01	62.21	54.65	62.03	40.8	66.59	60.31	59.3	59.28	74.75	65.38	53.64	59.29	58.37	50.02	60.09	50.16	53.42	44.41	49.54	71.91	63.97	63.82	53.56	74.81	51.5	49.46
ENSG00000100364	83.48	110.86	100.32	58.22	139.93	79.77	74.52	90.34	77.14	139.25	194.16	226.71	119.79	78	95.39	85.33	85.22	161.99	116.36	266.92	106.68	132.32	101.14	262.21	81.27	157.52	89.85	223.09	92.79	99.76	86.8	208.25	276.47	86.8	179.94	203.05	281.54	225.24	85.28	101.47	78.43	149.58	101.25	82.37	248.58	128.09	180.91	173.52	143.4
ENSG00000101452	3.44	2.35	3.2	1.58	1.79	2.25	3.21	3.65	1.19	2.79	2.72	1.33	2.72	0.89	2.71	1.84	2.44	1.39	2.39	3.71	3.3	3	3.33	2.78	2.64	3.24	2.53	1.49	2.16	2.92	3.44	2.58	3.38	2.99	2.99	1.37	2.01	4.44	3.72	1.67	1	3.67	2.32	3.18	2.44	1.88	1.94	2.82	4
ENSG00000088854	29.9	31.6	30.51	15.08	19.8	15.75	27.04	23.92	26.77	28.78	22.06	32.74	28.08	14.85	29.2	24.04	23.41	37.24	29.56	35.48	27.2	40.23	33.5	38.24	31.46	16.37	18.54	14.65	19.11	22.51	31.89	17.31	15.52	18.25	29.57	31.91	33.63	15.83	34.72	19.42	28.4	27.11	20.56	30.33	26.34	27.75	26.62	31.5	14.07
ENSG00000112659	33.46	23.2	29.88	21.36	13.09	26.88	35.86	41.91	30.62	23.08	40.48	29.2	31.02	20.92	33.94	27.09	24.37	30.95	39.69	42.94	31.44	29.05	32.75	39.74	20.08	27.56	26.04	30.44	30.11	19.1	26.02	37.63	34.79	29.64	34.31	27.12	36.73	34.53	37.33	27.98	29.81	30.53	34.37	16.43	49.08	36.05	38.97	35.62	35.78
ENSG00000253159	13.27	15	9.48	10.93	44.22	15.06	8.69	9.64	14.7	10.03	32.06	17.69	8.73	21.06	14.72	6.01	23.16	17.58	7.65	22.23	17.62	9.89	6.63	11.89	13.94	5.87	20.39	10.94	14.05	7.72	13.62	7.98	3.92	10.87	6.28	7.23	12.83	18.93	11.21	19.07	6.05	11.24	8.05	13.19	17.39	4.01	11.54	17.35	8.19
ENSG00000240764	96.29	114.05	102.24	73.59	201.54	147.21	166.34	150.51	153.45	192.96	140.43	150.34	145.77	223.44	150.8	181.05	253.31	141.77	113.3	126.98	177.98	185.37	204.08	108.19	207.14	117.66	231.25	109.91	245.09	126.84	187.02	82.21	87.29	245.07	117.17	104.07	126.22	106.2	118.85	200.62	128.47	152.74	107.64	178.71	105.52	148.75	128.63	204.71	88.52
ENSG00000113119	9.21	13.04	17.59	13.11	10.04	7.67	10.74	8.79	9.53	8.95	6.34	9.48	8.19	5.02	8.7	6.89	8.72	12.02	10.53	13.97	8.96	6.61	6.48	10.91	8.77	14.57	6.32	10.14	8.66	5.03	8.28	11.17	15.43	8.29	9.59	12.09	9.34	14.78	14.03	8.72	8.58	12.82	15.26	0	17.43	11.55	14.03	13.18	8.25
ENSG00000131495	255.76	276.98	324.75	459.92	221.4	696.56	495.71	519.39	391.38	487.57	495.71	415.88	539.04	822.26	604.76	528.09	455.05	283.18	394.7	329.98	446.83	341.39	332.85	506.84	520.23	810.51	536.92	693.32	820.8	608.86	587.09	651.65	729.75	438.3	449.22	565.66	496.32	616.89	315.41	483.89	470.57	404.16	525.73	290.8	533.67	583.85	437.68	432.82	933.01
ENSG00000100227	75.92	52.79	166.48	87.89	97.18	39.86	58.06	35.66	42.01	61.88	38.74	63.26	60.74	73.77	61.03	54.22	63.43	58.31	49.75	51	39.81	52.47	45.98	62.89	52.83	56.81	53.05	46.5	75.19	52.28	58.09	36.13	45.94	75.74	45.93	57.12	51.9	55.08	74.01	43.91	68.58	62.65	50.3	68.91	53.62	56.91	59.15	43.84	52.41
ENSG00000100056	45.72	42.92	62.69	68.04	65.67	65.55	58.88	63.1	39.97	55.06	64.54	52.03	52.74	79.43	43.19	47.96	59.72	41.35	48.42	54.96	52.08	37.86	38.92	46.97	52.58	65.57	63.97	53.75	55.77	55.19	52.66	55.94	59.05	60.19	56.69	40.76	64.74	73.1	48.38	46.25	38.47	47.46	47.92	32.83	59.21	52.66	51.61	52.64	58.17
ENSG00000133884	31.17	17.43	38.41	38.83	20.45	20.47	19.96	18.99	17.3	21.94	19.71	25.11	22.42	22.46	21.15	17.37	22.6	23.09	19.13	27.63	19.37	16.88	18.13	29.47	22.88	17.43	21.47	14.82	25.27	19.2	20.13	20.12	19.82	19.8	24.05	23.35	20.57	24.22	26.15	13.77	33.03	23.2	23.73	16.53	25.75	19.54	27.37	13.83	17.83
ENSG00000130037	10.52	4.41	8.38	11.78	4.92	5.16	1.84	4.18	4.09	6.64	6.8	3.5	5.46	6.4	6.21	2.34	5.92	6.36	4.45	4.25	2.91	1.93	3.27	3.9	5.84	6.69	5.16	5.97	8.66	4.79	9.12	9.16	0.3	20.26	4.4	4.97	5.9	9.46	3.76	3.83	5.36	3.71	9.57	1.82	3.05	1.44	6.96	5.92	5.89
ENSG00000130054	24.61	20.23	6.91	15.95	22.99	7.45	12.16	10.85	8.09	14.61	7.48	10.82	5.15	10.99	11.28	6.19	6.17	10.5	5.64	4.21	4.8	12.05	6.29	4.68	14.27	4.91	8.52	4.22	11.24	3.95	7.32	2.93	3.93	7.2	0.81	1.73	5.08	4.81	9.93	7.12	13.91	8.99	6.14	0	2.52	11.85	5.52	7.11	12.97
ENSG00000130165	32.05	44.8	78.47	55.19	41.93	49.47	56.1	45.88	73.67	61.1	57.98	47.91	54.19	71.12	65.86	70.23	70.56	55.8	69.98	43.48	72.34	67.47	57.75	49.2	58.46	73.39	80.19	87.21	81.43	49.02	68.45	36.74	104.51	59.24	67.97	91.83	71.28	79.83	47.62	49.03	89.63	61.5	58.31	53.26	70.59	70.82	97.7	55.07	100.54
ENSG00000130202	40.67	70.88	127.12	82.96	83.92	56.69	63.61	31.69	33.47	29.03	27.3	22.9	37.6	45.96	57.64	23.43	34.14	41.77	23.89	22.78	28.76	18.88	13.78	45.24	19.79	25.09	31.1	37.47	62.63	18.18	25.23	22.08	14.71	58.21	17.98	12.3	20.71	57.45	55.55	24.82	76.63	10.14	59.9	32.92	23.88	27.23	38.91	18.15	57.6
ENSG00000130208	12.49	32.59	104.42	43.02	11.67	113.22	180.71	161.77	43.97	37.35	78	31.12	177.83	194.5	159.31	104.58	59.13	15.1	32.47	12.1	33.17	10.19	15.52	20.18	20.52	42.37	52.08	60.69	99.9	36.39	46.8	22.46	28.28	14.8	27.88	14.91	14.62	58.76	359.26	81.88	400.23	25.85	93.42	51.89	50.67	105.62	142.77	2.55	398.01
ENSG00000130222	23.56	27.28	95.45	161.11	14.94	50.71	25.92	17.21	20.91	29.25	29.35	8.38	20.96	33.41	34.58	17.09	28.68	28.07	23.62	26.09	6.7	8.24	8.36	21.75	10.78	156.96	60.68	27.8	27.31	12.87	71.87	41.98	18.29	35.89	24.41	16.07	23.63	48.89	26.92	22.98	11.76	13.29	9.18	20.97	23.41	11.02	38.47	13.42	17.59
ENSG00000130244	55.07	37.63	40.19	50.58	48.6	121.43	68.54	83.42	83.63	54.89	102.78	33.54	81.67	67.89	104.06	52.33	99.95	66.58	95.43	44.46	69.06	32.95	68.43	93.93	84.45	93.4	40.53	59.46	86.36	80.22	99.73	57.76	116.39	82.65	95.61	76.7	100.27	86.36	59.44	63.51	101.6	69.06	59.37	50.84	99.3	110.16	81.6	45.05	100.54
ENSG00000130254	99.33	82.52	79.2	82.81	44.57	98.32	99.77	86.19	70.3	54.43	129.45	57.51	89.15	46.47	57.79	56.71	42.89	66.33	84.29	119.08	64.45	60.52	51.55	147.53	35.2	74.67	42.37	114.91	38.64	42.09	50.44	102.56	98.54	43.74	63.94	66.71	104.22	107.77	68.38	75.7	86.07	89.83	93.44	63.31	83.75	72.52	143.73	98.53	95.27
ENSG00000130300	1.22	3.06	4.35	22.61	3.41	4.02	0.85	0.83	4.53	7.84	1.18	0.3	7.57	0.71	4.31	0.65	6.47	4.85	0	0	1.21	3.27	1.51	0.98	2.1	0	1.34	1.18	3.86	0.66	0.34	1.23	0.41	12.1	1.02	2.9	1.42	8.07	22.92	5.31	3.72	0.69	2.58	2.52	1.41	1.49	5.4	1.12	4.54
ENSG00000130307	1.15	2.57	2.06	3.69	3.22	12.65	13.39	8.34	9.27	10.72	7.16	7.05	5.79	6.7	15.18	7.56	10.86	9.43	9.84	8.52	11.17	4.49	5.23	11.74	3.58	1.3	3.38	13.75	5.13	2.92	2.58	7.22	8.57	8.43	11.74	4.79	11.19	14.92	5.25	10.86	14.37	7.55	28.29	3.18	8.64	7.2	4.86	6.34	16.57
ENSG00000130309	45.37	38.82	89.48	52.08	42.72	38.4	51.49	35.61	35.44	33.14	38.64	34.94	51.99	27.7	50.66	32.7	32.22	29.92	30.02	32.3	37.42	32.98	29.89	36.66	24.4	34.98	31.36	31.4	29.59	24.03	32.07	34.3	39.23	47.89	23.02	24.62	28.56	33.1	53.03	36.8	33.04	41.12	52.52	31.41	49.4	27	54.56	37.12	27.72
ENSG00000130312	72.37	66.36	76.06	179.47	52.75	206.4	85.12	136.17	104.31	173.67	181.41	122.61	136.53	185.96	170.26	145.44	152.14	67.2	135.45	155.67	99.94	69.45	59.35	128.65	92.76	255.32	144.87	253.19	134.84	161.3	203.38	232.27	102.26	88.5	75.93	131.32	150.79	168.23	59.56	162.89	101.2	138.87	173.8	120.26	119.13	116.08	123.17	113.68	160
ENSG00000130313	75.38	71.59	182.92	93.14	109.02	131.05	70.37	66.89	49.8	71.11	68.8	61.41	62.82	91.54	72.07	41.57	61.18	53.81	64.38	46.95	47.66	28.71	25.28	48.34	24.18	60.88	51.07	66.28	46.44	40.53	61.87	65.35	38.2	53.59	46.07	53.57	51.82	112.25	37.61	58.83	56.47	47.27	54.42	39.77	48.55	47	51.67	46.99	69.71
ENSG00000130363	5.76	5.63	4.01	7.27	4.26	4.23	6.72	9.49	13.71	8.88	9.3	11.72	5.98	6.73	6.46	11.29	15.34	11.14	13.85	7.44	9.24	17.39	18.49	6.2	9.23	11.8	9.54	9.79	8.13	8.13	12.68	7.44	7.5	7.85	10.44	6.87	8.43	8.37	13.44	11.8	6.71	11.38	10.19	15.95	8.9	5.5	5.49	7.36	4.3
ENSG00000130382	86.69	73.58	89.01	58	98.5	71.51	86.02	70.15	107.33	75.53	82.2	77.07	119.32	114	140.1	88.67	110.29	105.87	82.68	86.41	98.54	70.84	93.38	148.66	90.08	73.52	103.27	44.85	136.45	80.4	96.75	80.32	80.93	131.24	64.39	74.08	80.3	66.28	106.21	69.85	153.16	78.14	69.59	38.86	93.99	158.73	78.42	83.81	101.55
ENSG00000130402	91.51	84.67	235.86	114.28	131.59	142.99	175.46	131.01	155.52	163.36	159.44	181.81	149.73	170.15	148.73	173.72	192.25	139.19	187.85	196.79	227.92	156.38	171.3	231.12	148.14	197.52	209.86	127.66	203.33	162.06	208.22	178.33	177.48	372.93	158.31	176.03	194.19	167.39	140.19	192.72	126.67	207.58	292.52	111.6	160.66	143.98	129.35	195.81	171.09
ENSG00000130429	16.84	25.68	113.37	38.5	20.39	45.58	34.84	26.62	31.39	56.66	32.15	20.6	83.79	25.48	47.74	18	45.13	29.43	43.58	30.41	46.76	22.86	15.22	53.82	34.72	25.32	31.55	40.17	52.95	27.18	41.74	69.17	22.88	112.12	30.33	32.44	30.47	122.03	89.69	43.08	56.2	25.92	123.96	22.26	58.57	33.83	84.11	17.85	68.61
ENSG00000130449	30.64	16.49	7.32	7.39	5.37	5.35	11.8	9.66	8.8	4.72	5.69	7.06	11.25	3.58	7.33	5.53	10.61	12.78	6.57	9.46	5.85	8.06	12.37	6.5	9.25	4.22	4.51	3.72	5.95	5.23	7.96	5.68	2.86	4.9	5.13	6.4	5.38	3.18	13.79	7.95	6.69	6.27	6.97	22.27	6.44	6.27	10.21	8.22	4
ENSG00000130475	79.55	76.46	50.18	65.14	56.28	58	48.09	76.23	37.31	45.5	77.2	64	40.09	36.38	32.6	38.59	33.13	40.33	44.85	54.64	36.48	37.23	40.69	48.53	29.45	60.15	38.56	46.26	25.7	30.54	31.24	48.9	66.63	24.08	54.2	58.55	54.04	38.99	41.26	50.44	31.27	48.68	31.19	27.87	55	26.93	29.01	48.03	50.59
ENSG00000169951	11.85	12.15	25.94	7.71	12.61	11.61	5.99	9.42	10.22	14.76	12.76	8.2	11.71	9.23	13.99	8.09	12.15	7.16	6.67	9.25	6.12	6.12	8.59	5.32	4.22	7.26	7.27	8.32	7.43	3.96	7.4	6.66	2.68	7.02	5.51	5.11	11.17	7.65	7.52	10.43	5.18	8.54	6.39	8.2	6.49	10.77	4.18	8.08	1.97
ENSG00000130508	47.92	27.71	89.76	43.17	3.44	12.04	23.51	13.68	15.52	8.73	8.2	4.29	6.56	0.72	11.9	6.13	5.24	8.91	6.39	10.71	4.62	4.81	3.31	1.99	1.21	5.9	0.6	3.58	0.87	1.57	2.76	3.87	8.9	4.08	5.03	4.89	8.39	6.8	8.43	5.15	14.32	5.32	5.22	5.1	3.8	6.7	4.16	10.81	5.51
ENSG00000130529	7.86	11.43	10.09	17.06	9.55	12.42	16.51	13.4	15.63	12.12	10.92	9.2	15.39	7.34	12.25	6.3	10.05	14.26	11.03	15.8	9.39	10.58	8.3	16.83	7.56	9.33	5.78	9.17	6.1	5.15	10.38	11.13	18.69	12.57	11.62	7.27	11.73	25.12	17.97	8.37	12.71	7.99	26.93	4.9	11.16	4.5	13.23	10.37	17.03
ENSG00000130544	12.16	6.08	6.5	3.97	2.69	3.29	3.14	3.49	2.39	5.38	2.89	4.78	5.7	2.99	4.54	4.1	1.82	4.64	5.49	2.48	0.85	1.57	3.58	0.52	1.89	2.71	3.3	1.87	1.35	2.45	2.52	3.02	1.3	1.82	4.29	3.44	3.75	2.66	5.85	2.1	4.47	4.33	5.05	0	1.48	3.67	3.66	2.75	0.96
ENSG00000130558	220.03	459.92	173.52	534.96	530.39	1259.63	1027.15	1831.78	1171.99	1091.48	1464.62	1278.66	1397.12	1541.97	1537.68	1555.52	1268.99	729.07	1027.01	667.5	1365.41	1223.03	1161.59	834.03	1341.48	1116.31	1419.27	1286.13	1006.18	1154.98	1017.71	756.62	998.45	690.6	863.88	847.92	821.14	409.95	566.98	1696.71	1162.85	1443.79	877.18	1333.53	934.02	1264.19	1154.44	1227.07	1242.24
ENSG00000105245	121.68	144.43	162.75	134.31	209.47	125.01	96.15	151.35	185.68	199.89	181.59	151.41	110.18	236.45	131.61	167.73	155.15	110.98	155.38	128.59	147.39	132.74	127.33	133.39	115.76	155.09	138.25	80.22	159.7	110.01	161.98	100.28	60.43	124.96	102.45	77.31	93.7	106.93	128.1	213.82	82.71	133.73	98.39	127.12	124.15	134.52	104.84	197.8	95.67
ENSG00000130638	296.93	341.23	200.28	242.33	256.35	261.91	237.19	278.77	260.02	278.43	247.01	289.45	230.51	213.37	179.96	302	292.02	210.88	289.34	215.92	316.54	268.05	260.38	184.17	292.19	235.99	200.21	239.09	154.87	315.45	288	232.24	220.93	194.21	267.34	259.28	200.26	188.29	213.65	330.93	217.49	226.31	263.77	272.56	212.1	254.11	227.36	257.17	205.3
ENSG00000130643	179.07	327.3	96.61	363.25	540.68	694.42	394.26	389.79	309.19	483.32	655.04	331.69	336.28	592.1	475.19	355.12	452.56	420.15	375.59	494.79	319.75	243.67	331.46	438.05	441.97	741.49	665.27	662.47	637.98	577.48	546.94	1202.36	668.66	556.63	560.3	615.52	789.26	798.69	227.26	502.63	324.87	357.55	393.19	338.61	358.62	319.36	718.38	613.05	359.73
ENSG00000130695	13.38	12.53	15.54	6.97	11.66	9.83	11.9	10.84	11.45	12.37	12.61	20.36	11.58	6.97	9.22	12.37	8.22	10.23	11.56	15.06	10.8	13.98	14.6	12.27	14.44	11.34	11.17	7.03	8.93	10.07	12.19	11.7	15.96	7.45	14.12	18.34	9.52	7.8	12.19	11.65	11.37	12.24	11.84	13.52	14.88	9.47	12.63	13.53	9.18
ENSG00000130699	17.87	10.71	11.69	10.26	7.56	10.32	6.55	7.25	8.99	6.44	6.87	5.73	4.17	3.98	7.54	6.6	4.84	6.17	10.29	5.36	5.37	4.79	5.29	6.88	3.78	3.97	3.13	7.44	5.41	3.02	4.54	3.73	3.76	3.63	3.8	5.84	4.48	3.18	10.21	5.35	11.53	5.04	8	3.54	5.43	8.36	6.22	6.79	4.45
ENSG00000130706	84.53	70.7	110.29	160.99	107.54	123.22	108.42	98.79	86.5	113.51	85.82	99.47	90.39	138.55	88.59	100.99	90.81	81.42	88.08	96.36	99.03	71.99	70.17	97	103.65	131.93	119.19	115.28	146.89	97.79	103	128.84	137.53	109.08	101.88	93.28	116.82	145.67	72.26	93.53	97.47	98.22	99.51	67.87	107.87	94.17	99.69	85.43	137.94
ENSG00000130725	80.22	72.38	97.98	110.52	97.11	143.39	128.92	140.44	116.66	169.69	159.01	127.19	150.88	208.68	184.75	135.45	165.73	146.8	166.34	116.59	121.04	101.76	112.14	212.13	146.49	188.63	230.77	246.27	164.7	151.38	163.95	183.16	214.27	171.09	154.65	153.44	182.46	231.58	111.49	122.51	145	110.1	132.68	113.61	141.6	132.79	142.41	163.33	285.96
ENSG00000130726	268.98	220.24	397.54	273.29	313.38	250.4	236.52	156.28	165.34	164.35	187.99	153.84	195.15	222.98	160.94	147.18	177.42	199.24	145.01	147.85	157.84	121.62	121.7	188.66	154.64	163.71	186.46	162.08	201.35	165.94	153.17	172.75	190.45	212.93	135.06	144.88	161.16	203.28	174.81	170.6	192.28	160.22	182.06	97.3	182.24	150.43	146.93	145.46	183.41
ENSG00000130733	22.08	32.29	38.04	40.37	46.03	63.67	38.05	55.58	43.79	57.14	53.22	44.86	52.9	76.38	51.15	52.66	53.08	37.58	53.65	59.25	55.25	42.41	38.52	41.86	64.89	60.5	61.25	49.52	49.15	60.31	47.25	43.52	66.35	60.38	45.97	44.1	47.72	52.88	40.77	60.78	30.43	54.16	41.72	21.17	66.45	52.13	50.16	51.07	58.36
ENSG00000130741	77.69	39.92	68.54	43.39	20.6	25.72	31.36	31.49	37.39	21.58	27.58	37.67	49.82	15.53	39.68	31.05	18.39	45.69	49.67	37.98	30.67	39.06	33.05	39.02	41.4	32.64	20.6	36.73	13.34	47.41	19.67	38.22	31.38	22.89	42.57	37.6	34.82	33.7	43.6	43.59	39.76	41.47	42.02	26.17	37.73	28.07	32.45	34.36	30.32
ENSG00000130748	45.58	63.72	139.5	57.89	78.54	199.98	58.84	151.49	83.19	163.73	456.46	100.79	84.93	272.85	410.83	117.25	129.49	72.33	115.53	112.49	83.22	62.77	45.13	93.23	75.13	268.18	153.05	184.11	93.49	67.7	100.87	384.17	88.06	67.85	73.93	132.64	149.23	121.81	61.87	147.08	113.29	88.43	108.85	100.6	69.35	104.91	56.08	170.44	140.44
ENSG00000130749	20.23	19.51	23.79	10.1	27.4	15.93	17.06	14.92	13.6	17.25	17.61	14.61	11.76	13.99	18.73	11.81	13.78	15.88	7.73	20	10.01	12.64	11.8	10.68	14.04	13.48	17.17	9.83	10.78	11.62	13.81	12.39	13.18	16.59	9.33	14.54	16.67	15.25	15.22	17.14	18.22	16.55	12.27	15.44	13.52	13.35	14.82	14.95	9.56
ENSG00000130755	4.26	5.96	7.64	13.21	2.99	7.83	2.98	4.36	2.65	4.78	5.51	7.43	5.69	2.49	12.08	4.56	15.13	3.09	6.65	4.13	8.49	3.13	3.97	8.61	6.3	3.61	1.57	8.28	10.53	5.82	4.79	11.49	8.69	9.09	8.32	6.36	2.49	24.77	12.18	1.16	13.04	6.01	16.8	0	8.65	6.98	23.01	5.23	9.55
ENSG00000130758	141.36	210.78	118.75	169.44	312.65	314.26	219.27	252.7	287.28	308.42	300.17	147.77	228.67	301.97	454.13	186.54	231.36	291.69	182.02	180.35	167.89	137.65	153.21	296.98	186.6	251.22	214.31	126.08	284.67	150.84	194.04	247.39	215.12	207.03	147.44	175.51	236.62	157.01	131.24	189.13	295.14	178	124.98	138.34	205.94	321.35	219.44	209.92	379.16
ENSG00000130766	22.09	12.68	19.96	52.22	34.03	19.74	15.46	13.84	12.61	17.4	10.8	8.33	16.47	19.52	13.54	11.17	16.11	11.26	14.43	17.06	13.47	8.77	18.91	19.29	13.54	16.2	18.01	4.64	21.49	14.67	15.77	8.85	16.22	18.25	8.99	13.18	12.23	17.35	18.76	12.39	16.17	19.2	12.31	12.4	13.84	12.7	25.78	8.06	5.35
ENSG00000130787	191.63	96.57	100.68	84.98	86.72	81.01	93.28	70.46	72.73	95.92	131.6	108.88	147.84	52.83	100.63	50.41	59.97	113.36	65.42	119.27	58.24	49.8	48.37	78.19	43.79	70.21	42.57	96.18	61.53	37.74	54.39	64.7	73.38	53.6	80.63	80.84	128.36	65.78	73.95	71.74	126.75	67	76.65	39.86	75.96	89.29	77.48	79.4	102.79
ENSG00000105364	73.09	73.05	106.93	125.87	110.14	133.64	106.18	117.09	110.12	140.88	135.76	100.16	97.56	189.95	134.02	134.29	135.61	101.4	93.34	107.12	134.66	95.73	89.69	133.62	125.21	152.64	167.42	178.46	157.33	143.74	112.97	140.45	173.79	140.3	119.31	110.16	142.77	162.32	90.33	142.75	95.02	130.97	120.24	91.1	125.51	114.4	91.09	121.1	165.14
ENSG00000130811	123.12	125.36	313.3	285.46	160.57	236.38	139.59	191.05	132.43	188.56	165.62	163	147.18	235.03	197.29	143.4	185.98	188.63	189.88	154.02	153.11	101.22	104.47	153.68	130.45	209.61	201.51	241.09	188.7	159.11	168.35	239.13	215.98	228.63	158.96	174.41	185.53	266.99	111.32	162.14	161.41	147.79	191.69	91.61	157.64	142.12	189.06	152.79	237.45
ENSG00000130813	14.39	46.27	55.86	38.41	34.46	46.28	71.78	63.77	54.76	42.36	62.75	47.51	48.02	58.83	62.46	45.19	63.88	50.89	60.32	74.07	51.35	44.91	54.76	61.04	43.45	50.34	51.63	68.18	35.55	36.36	49.54	75.19	76.99	52.43	55.21	33.29	70.53	56.75	67.85	59.95	88.04	63.96	65.45	44.84	65.68	69.19	51.4	51.88	56.43
ENSG00000130844	18.69	18.29	10.46	24.54	8.73	17.17	22.08	11.15	21.04	13.43	25.66	16.88	18.71	3.41	9.52	18.1	14.93	26.27	19.13	25.46	23.26	24.02	28.3	19.82	16.41	67.85	17.62	32.35	30.91	22.65	55.8	26.38	21.42	43.59	26.72	30.68	29.39	23.27	28.7	13.4	19.9	21.75	35.77	46.1	22.68	25.81	25.96	32.61	27.04
ENSG00000130856	10.21	7.02	6.69	7.15	6.18	5.53	8.32	7.53	13.41	5.91	5.62	9	8.64	2.93	8.06	6.98	7.49	11.41	11.61	11.19	7.33	9.34	10.6	8.25	7.59	6.67	5.66	7.15	5.08	4.39	8.28	6.09	5.23	5.12	7.94	6.89	7.64	3.89	10.14	6.67	7.17	6.89	6.7	11.82	8.53	9.86	7.86	8.11	7
ENSG00000130876	7.09	16.52	9.17	56.16	33.96	85.12	90.59	70.08	13.21	15.57	41.22	8.54	96.74	51.41	38.52	26.84	15.94	36.86	11.52	14.6	8.24	9.84	4.4	38.19	16.02	9.52	35.22	45.93	27.1	23.24	19.92	7.97	22.08	13.86	16.49	4.94	37	32.37	32.75	25.18	55.25	7.34	27.59	31.91	12.67	29.01	41.27	28.28	43.25
ENSG00000130881	206.71	269.43	212.27	279.02	594.06	419.39	344.7	323.98	348.61	478.3	406.29	207.76	352.99	503.06	656.96	252.14	370	346.77	223.29	190.31	240.63	155.4	143.83	283.27	197.09	299.97	263.91	201.91	370.64	154.32	242.76	275.93	175.54	253.96	158.04	176.12	254.43	201.19	155.85	338.03	443.41	190.57	210.07	129.11	195.11	405.21	213.76	288.83	479.88
ENSG00000105447	21.94	13.8	36.85	18.89	45.81	23.18	15.84	21.03	18.32	37.29	24.81	31.77	21.96	38.84	30.61	26.75	26.78	21.39	26.73	30.56	27.77	26.52	26.84	28.25	26.02	36.63	38.85	32.65	36.29	22.85	32.37	29.12	36.8	39.48	19.51	30.28	31.3	35.29	19.2	37.08	35.95	32.12	31.18	19.94	30.2	21.88	22.64	31.13	17.41
ENSG00000130935	23.05	11.58	7.7	25.03	1.64	9.48	14.77	11.45	10.68	5.04	8.84	13.24	10.08	3.19	4.43	10.23	5.83	8.22	12.49	10.98	11.15	7.65	11.41	11.05	4.62	8.62	3.16	14.81	3.31	7.47	5.49	10.27	11.68	1.94	8.07	12.13	10.75	11.03	12.95	8.33	10.93	8.6	9.72	11.36	11.32	9.59	8.93	8.15	10.51
ENSG00000130958	1.07	0	6.38	5.15	0.5	1.57	2.99	2.18	2.65	5.99	0	14.91	2.85	0.62	5.3	4	4.55	7.75	2.5	4.66	4.96	4.71	3.32	7.77	2.63	6.34	3.93	6.23	6.03	2.92	3.6	9.36	7.26	6.08	9.54	14.03	3.75	8.87	10.38	0.58	5.6	1.81	12.96	4.44	6.19	3.5	8.82	0.66	6.38
ENSG00000131013	20.75	8.55	3.91	24.45	5.61	12.44	21.41	10.42	6.45	2.76	10.94	10.34	14.09	2.55	3.87	7.88	5.04	10.7	8.94	9.79	6.16	6.68	9.84	15	5.92	5.09	1.21	9.55	2.31	8.05	7.98	7.73	10.02	5.05	7.62	13.69	8.63	10.43	10.3	8.65	15.27	7.09	11.59	18.15	8.55	9.83	23.93	8.04	8.97
ENSG00000131016	41.07	37.32	25.43	51.69	26.17	24.75	44.93	34.17	50.28	21.84	36.58	41.53	86.53	31.83	36.06	68.52	39.57	81.6	61.11	65.84	64.96	77.4	95.5	92.23	68.7	57.11	42.67	51.36	46.46	76.87	60.51	68.31	44.31	54.85	75.84	55.16	56.56	70.95	106.66	52.79	46.32	52.32	52.74	156.19	53.91	51.65	90.61	47.62	47.14
ENSG00000131051	91.03	68.23	43.56	137.42	15.08	62.64	109.38	78.34	71.39	28.24	72.58	68.52	69.52	14.33	35.68	55.9	25.22	74.93	85.59	63.49	65.58	58.16	48.53	94.94	27.05	45.44	10.45	89.72	21.87	42.67	42.82	53.98	71.49	14.69	66.29	60.89	74.44	56.28	77.11	55.02	78.43	74.69	101.02	56.32	76.34	72.38	94.3	51.9	77.15
ENSG00000131069	21.46	13.68	15.74	22.82	13.72	15.5	11.6	13.86	8.89	17.52	17.76	22.52	14.74	18.47	16.54	12.68	10.43	17.75	13.8	21.53	14.5	9.77	11.23	12.47	15.22	14.05	17.46	12.81	11.43	12.34	12.27	14.98	20.98	14.46	17.65	20	20.05	15.94	15.28	13.17	12.83	18.28	13.24	17.21	24.23	13.25	24.87	12.48	14.06
ENSG00000131089	89.38	92.94	38.73	61.19	75.88	74.51	89.66	118.51	181.14	157.37	108.09	141.21	98.93	96.11	135.17	145.35	181.14	170.78	163.2	118.28	152.68	208.12	216.02	92.47	199.34	113.23	128.74	94.8	107.69	167.61	152.84	124.56	87	122.05	141.12	152.24	116.74	64.25	156.04	139.64	110.02	149.17	90.89	206.03	130.77	157.88	85.14	151.82	86.29
ENSG00000131094	17.95	107.88	176.84	228.72	186.59	283.64	141.36	192.71	156.1	256.61	92.76	111.8	275.51	251.55	273.45	105.52	140.21	205.06	129.47	130.43	86.39	70.3	94.78	134.14	150.41	140.79	135.39	200.58	158.33	71.08	116.01	111.94	73.16	178.64	110.18	66.96	170.69	189.98	215.4	100.5	203.91	81.03	138.78	74.56	132.64	132.19	185.21	101.87	355.24
ENSG00000131095	182.34	237.24	7723.67	1366.38	655.02	265.45	351.85	181.91	202.81	1603.93	209.75	631.17	2392.81	554.77	491.02	185.42	1239.43	1086.59	959.32	2825.6	359.04	179.42	128.21	2625.43	558.18	335.68	441.2	334.53	1384.2	304.66	705.9	635.72	220.56	2729.95	569.36	467.76	1145.28	6753.34	3629.53	129.75	989.6	720.38	413.21	421.26	2339.13	972.52	3892.52	332.94	862.34
ENSG00000131097	10.77	15.05	6.43	16.69	7.55	45.51	35.81	33.04	16.73	25.66	31.31	18.78	47.91	20.44	51.51	31.66	26.77	37.11	35.69	37.82	26.81	19.77	10.04	43.51	11.94	22.83	25.76	47.09	45.6	42.65	22.7	30.86	53.04	22.97	31.55	33.75	26.79	11.18	16.92	20.59	70.59	18.23	63.68	11.18	29.65	30.84	29.06	31.39	92.5
ENSG00000131100	133.95	158.61	91.75	156.5	119.04	208.51	174.69	249.78	288.82	346.08	271.5	360.58	299.17	367.36	249.41	438	386.13	292.46	426.03	358.2	476.04	419.22	420.2	333.19	479.06	630.36	479.37	501.56	406.88	657.86	516.67	620.71	546.9	323.04	571.65	625.55	441.17	450.29	258.18	366.62	254.8	403.94	331.32	403.73	428.55	354.66	243.52	413.4	311.92
ENSG00000131143	652.45	618.95	812.34	1076.71	565.33	1563.31	1145.32	1426.14	910.06	1428.7	1407.83	1150.57	1509.3	2084.56	1741.69	1365.31	1306.9	1411.86	1386.87	1130.12	1224.84	948.25	952.41	1701.84	1442.66	2046.75	1956.79	2350.05	2111.24	1753.57	1477.51	1940.12	2484.14	1379.19	1508.59	1691.13	1690.55	1895.9	827.21	1328.9	1504.44	1191.39	1376.26	1131.6	1498.95	1513.73	1464.29	1279.8	3004.35
ENSG00000131148	40.83	39.24	63.24	92.29	33.39	64.71	54.49	55.67	50.73	52.22	35.45	38.15	48.82	67.06	51.54	39.55	58.9	47.2	47.76	32.76	51.67	42.48	25.37	29.9	39	50.86	51.64	44.64	54.93	51.58	47.33	43.01	44.21	44.45	44.15	40.37	53.77	55.08	48.13	53.67	40.14	40.33	60.36	15.9	42.89	45.94	43.75	43.06	40.03
ENSG00000131149	24.79	12.55	88.25	13.53	9.07	9.63	13.75	8.93	30.51	35.53	17.98	26.68	23.1	19.53	26.02	23.75	30.06	20.35	25.16	16.54	24.53	24.61	24.84	16.82	19.83	17.05	15.14	13.63	17.16	14.82	25.89	15.92	17.63	23.44	14.75	18.56	18.61	8.54	18.17	24.78	27.18	36.29	21.55	11.66	18.57	35.78	12.77	32.14	22.01
ENSG00000131153	5.79	3.24	20.74	4.99	4.06	5.32	9.12	3.95	4.5	0.81	0.94	0.72	3.86	5.07	4.1	3.09	2.06	4.2	2.26	7.01	3.84	1.42	0	11.7	4.28	3.68	2.13	1.41	4.09	1.58	2.44	2.93	0.98	1.03	0.81	2.59	5.08	10.82	4.14	56.93	5.06	0	1.76	0	3.36	3.55	6.43	2.66	10.81
ENSG00000131165	142.13	169.66	231.72	145.31	307.28	174.12	141.36	173.79	174.5	205.55	143.57	149.52	125.47	231.88	180.65	133.24	173.04	125.2	153.06	160.67	161.76	119.84	120.54	138.54	157.36	135.84	141.95	127.16	166.38	139.26	178.15	155.91	95.02	172.42	142.9	138.7	141.94	118.94	116.68	162.69	129.14	100.59	128.61	126.53	160.19	138.47	165.48	154.35	126.38
ENSG00000131187	9.18	19.06	8.09	25.29	24.3	15.42	7.04	5.96	7.33	17.15	11.01	4.79	8.56	9.44	6.5	4.2	1.55	4.12	1.7	13.34	3.19	5.35	7.33	15.54	6.46	12.23	8.36	18.26	8.64	10.98	9.83	25.05	8.31	6.84	10.73	12.52	18.16	28.66	5.74	4.3	4.58	2.96	6.63	7.26	7.09	2.86	12.21	4.29	7.83
ENSG00000131269	17.51	8.53	19.84	12.37	4.82	9.57	12.57	10.71	6.69	3.52	7.25	10.51	17.58	2.1	6.04	8.4	6.06	11.07	8.05	12.18	6.56	7.25	10.32	16.32	4.65	7.61	4.96	9.6	2.22	7.85	5.8	9.99	13.42	2.23	10.52	7.5	8.41	14.54	16.93	6.87	17.66	7.6	14.7	9.33	11.45	5.14	17.68	8.54	6.71
ENSG00000131351	5.9	4.76	7.04	7.22	2.45	5.3	5.04	7.59	2.44	4.04	7.19	4.24	4.08	2.3	3.25	3.5	4.65	6.18	3.58	3.81	2.61	2.24	1.63	3.7	1.61	5	3.86	3.82	2.77	3.22	4.42	6.18	4.9	1.86	4.75	3.52	4.6	7.07	2.99	2.15	5.72	4.07	7.15	0	3.42	1.61	5.41	4.02	2.94
ENSG00000131368	105.21	111.6	78.54	130.03	91.09	186.51	131.07	195.13	146.11	171.77	166.93	160.37	137.68	205.11	190.78	172.01	172.52	181.83	195.47	142.42	145.86	152.26	156.69	147.52	170.09	217.81	202.68	222.54	206.38	196.94	175.66	187.78	209.17	143	162.33	163.47	176.58	124.6	134.4	153.84	167.67	131.86	181.1	70.71	144.39	178.54	126.75	162.35	214.95
ENSG00000131375	20.52	13.93	9.19	14.14	5.48	8.08	14.37	12.24	14.57	6.16	10.65	8.58	15.98	2.78	8.31	7.64	4.68	19.14	14.57	15.8	11.19	12.2	12.98	14.8	7.77	4.35	6.2	11.4	2.59	8.41	5.15	10.87	14.44	4.69	13.29	12.03	12.44	4.56	16.34	8.01	11.21	11.37	11.11	12.18	13.38	18.29	13.03	11.24	4.93
ENSG00000131381	32.81	28.46	37.99	15.69	28.48	16.24	16.88	12.78	31.2	29.29	16.87	18.35	14.3	17.6	32.27	21.12	33.77	30.61	21.41	28.88	19.56	29.84	29.13	12.99	26.74	16.47	26.61	11.71	25.05	24.15	34.25	16.71	15.47	30.47	18.31	29.58	21.17	9.45	34.45	13.17	25.75	25.32	13.4	33.39	17.08	23.02	13.18	19.31	16.01
ENSG00000131408	27.52	37.82	87.82	36.3	69.82	58.38	72.68	79.88	56.67	89.95	81.29	80.73	102.17	120.79	122.6	90.79	93.27	97.55	77.89	88.39	91.37	82.78	90.88	162.67	134.91	138.05	171.89	120.75	157.62	106.97	112.71	108.7	164.02	150.96	110.16	116.42	121.05	133.19	91.24	89.79	125.78	104.3	104.45	104.55	97.55	103.62	83.4	77.69	153.89
ENSG00000131435	13.01	7.73	224.88	135.59	11.4	17.34	20.5	6.1	3.54	8.21	8.93	6.08	16.65	16.15	17.29	3.91	12.71	9.44	21.57	18.91	10.26	5.57	1.01	32.2	2.81	13.8	15.56	11.07	40.76	11.55	22.4	20.29	17.13	38.16	9.08	10.68	11.42	108.04	46.02	9.33	22.04	10.56	21.7	10.14	14.61	20.63	22.73	14.97	26.73
ENSG00000131459	20.18	22.1	27.37	55.61	15.52	23.18	32.97	20.35	19.85	12.97	19.83	12.57	24.32	14.24	16.39	18.88	24.48	15.55	16.72	24.85	11.44	15.85	15.15	16.65	13.26	20.68	8.97	19.61	24.33	12.86	18.43	14.17	17.42	23.31	18.07	18.07	20.67	35.25	28.83	12.86	18.37	22.3	16.06	12.23	23.88	18.58	26.97	18.83	13.82
ENSG00000131469	872.5	368.09	1073.73	932.68	196.5	727.99	437.5	415.29	291.78	469.38	370.72	327.06	400.45	532.48	608.54	377.07	403.33	362.08	439.81	247.53	366.6	230.91	250.28	517.62	382.64	653.27	335.51	561.45	729.49	419.73	472.71	569.73	505.97	405.15	334.48	525.5	343.88	673.8	317.82	356.43	494.61	275.04	593.49	318.39	474.97	469.59	530.37	274.93	989.25
ENSG00000131475	16.73	33.17	33.61	28.29	43.35	52.55	45.79	33.18	21.73	50.32	31.45	29.56	46.02	51.52	36.65	31.71	36.73	25.38	27.28	35.37	31.3	31.28	25.51	25.81	45.74	49.02	33.58	26.61	45.08	54.01	41.03	35.89	50.63	31.36	38.2	31.78	25.82	35.36	29.55	33.24	29.24	22.32	37.82	31.59	36.15	37.34	30.91	30.8	36.35
ENSG00000131477	18.74	83.82	59.31	77.45	94.56	112.95	103.64	52.38	67.52	52.53	12.11	43.89	41.69	85.36	65.07	31.05	89.17	58.45	81.83	50.84	82.11	29.36	27.94	28.77	35.1	28.61	34.48	78.31	80.67	31.73	49.5	99.81	38.19	95.92	31.37	23.49	18.64	32.67	29.99	56.31	88.44	27.5	192.06	23.35	36.93	50.61	16.66	33.35	167.95
ENSG00000131480	7.47	7.76	3.19	10.78	1	2.61	5.48	4.85	3.76	4.39	5.28	4.43	6.01	1.04	2.27	3.99	2.02	2.06	3.05	5.51	3.78	4	2.65	7.76	2.98	1.51	3.66	2.07	1.51	2.14	5	5.28	4.59	1.77	3.77	3.61	4.16	2.66	5.08	2.53	3.11	4.82	2.59	5.91	7.01	4.07	10.16	5.46	3.72
ENSG00000248383	4.75	12.02	1.17	4.04	18.14	2.87	2.74	3.62	6.94	8.77	3.61	6.26	2.24	3.91	2.18	4.18	3.37	3.24	1.74	3.79	1.85	7.38	3.99	0.45	4.27	2.37	3.9	2.99	1.18	2.14	2.98	2.26	1.52	1.99	3.27	3.17	1.96	0.46	2.55	5.03	2.93	1.89	3.56	2.32	1.13	3.43	1.06	4.97	1.25
ENSG00000131504	37.22	29.89	50.64	24.87	30.86	12.96	18.81	20.99	28.51	17.1	15.91	18.13	18.43	14.22	23.6	26.03	22.66	26.39	31.64	29.15	34	29.87	34.25	31.43	33.25	22.55	29.86	23.12	30.22	35.47	38.06	23.59	25.86	41.18	28.74	23.72	23.91	19.28	30.39	22.47	15.16	30.8	20.88	25.58	28.71	25.65	23.64	21.98	16.72
ENSG00000254245	6.64	10.81	8.79	4.97	15.77	6.36	9.29	4.13	3.76	6.47	5.97	3.02	13.1	6.57	8.59	6.94	5.74	8.58	2.03	6.43	4.6	2.83	2.69	14.69	2.99	4.16	5.52	5.05	7.53	2.36	5.03	1.75	3.14	9.03	5.31	2.24	4.73	13.18	7.26	4.41	8.83	8.14	3.67	7.19	2.68	4.49	6.6	6.91	3.88
ENSG00000131507	469.31	864.54	365.71	474.49	596.11	518.79	399.04	547.29	560.53	658.88	597.01	620.61	428.42	420.67	470.07	666.97	585.66	429.29	539.05	519.36	619.12	749.89	711.24	339.03	741.28	560.5	465.86	477.3	352.61	757.86	654.32	588.71	454.77	379.35	640.89	693.47	500.37	398.7	519.09	666.49	387.9	627.61	522.9	609.6	494.14	488.28	373.51	599.03	318.83
ENSG00000131558	83.27	62.56	48.19	28.57	71.06	35.92	34.44	44.06	49.34	50.84	37.6	47.1	23.75	31.92	38.05	44.51	46.81	53.41	34.6	45.17	41.84	57.93	45.34	28.84	53.41	39.54	44.96	27.81	24.73	46.54	39.76	29.7	32.98	42.06	41.99	43.95	35.38	22.42	44.83	43.03	43.27	42.64	39.58	44.08	39.32	36.31	35.94	46.76	26.9
ENSG00000131626	10.34	5.92	14.65	13.59	5.96	10.61	19.7	10.49	11.36	6.88	9.01	10.67	18.83	4.78	12.1	11.18	12.98	13.26	12.94	20.62	8.78	12.48	10.01	21.38	11.03	9.59	6.73	8.88	6.62	10.25	9.87	11.68	8.82	5.98	9.93	10.62	11.4	14.18	18.83	9.07	14.71	15.07	11.96	20.98	14.92	11.61	15.43	9.45	17.25
ENSG00000131634	5.56	7.25	8.85	7.66	5.19	23.15	5.19	11.37	8.06	21.81	19.15	13.85	19.78	12.98	36.76	8.91	10.52	13.44	13	13.46	7.38	4.53	5.75	23.95	5.48	6.28	2.73	23.4	2.61	6.07	11.45	28.73	7.55	17.12	7.24	11.06	15.18	23.07	12.7	13.16	19.43	9.41	42.69	7.7	5.37	16.68	14.12	3.41	38.74
ENSG00000131725	19.24	27.41	11.12	27.36	17.11	13.68	14.99	15.23	28.72	11.31	13.43	17.01	17.12	6.89	10.77	18.24	14.54	20.93	19.36	16.54	19.57	19.6	17.74	10.53	12.54	13.16	5.71	13.57	7.01	16.95	10.11	16.32	13.07	6.62	22.51	15.93	12.71	9.02	25.53	16.44	18.17	18.56	19.95	19.34	14.39	12.7	13.2	15.42	11.59
ENSG00000131730	1.28	3.58	0.77	4.86	0.6	5.65	8.08	9.61	6.37	3.59	4.56	3.51	7.42	5.62	5.91	4.45	2.28	6.51	10.5	9.63	6.81	3.45	3.19	8.29	7.27	2.17	4.25	11.84	6.79	5.6	5.4	3.03	5.66	6.38	7.15	4.21	13.88	7.98	6.96	4.55	13.44	5.06	10.88	5.33	9.66	12.07	9.77	5.11	19.15
ENSG00000131732	16.83	14.94	10.64	21.82	2.31	16.73	27.72	7.42	10.45	5.55	15.99	14.8	14.97	1.73	9.82	16.93	9.14	9.33	20.07	13.91	17.74	9.69	15.37	19.19	6.34	4.2	2.19	17.31	2.79	12.98	5.01	15.35	24.88	4.22	14.91	10.63	13.32	13.15	16.97	14.06	11.25	17.32	16.81	8.22	14.92	15.39	26.4	9.11	23.66
ENSG00000131781	0	2.47	0.75	1.31	0.3	4.18	2.65	0.86	1.18	0.35	2.86	0.63	0.56	0.37	1.79	2.03	0.45	0.92	1.48	1.22	0.84	0.93	1.57	2.04	0.62	1.07	0	1.84	0	1.38	1.78	1.28	2.15	0.9	1.41	0.75	1.85	0.52	2.53	1.38	3.31	0.71	1.53	2.63	4.4	1.55	3.61	1.55	1.89
ENSG00000131791	9.86	16.54	20.61	10.87	5.07	2.17	4.14	4.71	6.74	2.76	2.55	4.91	7.02	0.58	6.29	4.22	3.5	4.29	6.15	11.47	5.24	5.79	5.51	3.98	4.38	6.69	0.73	0.96	0.7	3.23	2.77	5.98	2.68	1.4	8.25	2.94	4.62	0.82	12.96	2.16	6.03	5.57	6.58	8.19	6.29	4.84	8.77	6.05	1.47
ENSG00000131849	6.47	10.01	9.78	9.44	6.94	7.28	6.93	8.31	8.04	8.97	8.86	7.4	6.44	4.67	10.52	10.58	5.68	8.84	7.13	7.19	6.07	8.58	8.52	5.54	7.13	7.1	6.45	9.25	3.76	7.07	10.06	5.39	6.73	9.75	9.14	11.82	8.25	5.06	9.58	5.2	8.65	12.89	8.31	6.33	10.15	8.73	8.46	9.58	7.96
ENSG00000131873	11.6	16.21	38.79	25.03	10.66	20.18	19.22	12.65	11.53	10.19	15.49	10.98	31.65	7.45	18.08	12.4	15.93	20.19	15.08	12.36	14.12	10.79	9.61	24.37	11.05	15.41	8.25	10.14	29.47	11.4	30.42	17.73	9.72	25.29	11.65	9.46	10.41	23.11	27.84	8.87	16.22	9.82	18.05	24.09	17.03	13.92	20.38	13.52	11.55
ENSG00000131876	45.22	47.63	25.75	73.89	8.84	27.83	47.86	54.49	33.32	17.69	29.22	26.2	29.01	14.74	21.61	30.91	17.18	22.89	36.9	31.59	34.91	43.76	28.09	39.09	16.07	33	13.16	44.97	17.07	28.15	33.69	60.27	66.44	14.95	49.88	26.36	28.93	52.39	35.46	35.05	22.06	37.39	38.27	34.95	35.35	37.87	36.06	23.23	26.71
ENSG00000131931	15.1	11.96	12.02	16.47	4.11	22.19	25.54	15.44	15.63	11.99	19.51	20.06	12.31	9.55	7.13	17.48	8.04	17.34	16.68	18.28	16.7	17.25	11.72	11.18	10.54	8.54	5.55	12.23	5.33	19.24	6.36	11.03	18.8	8.94	11.94	19.52	13.25	7.31	7.19	9.62	8.8	17.75	12.97	5.23	20.42	14.41	19.17	13.12	11.28
ENSG00000131941	3.51	8.12	23.34	50.04	10.53	15.1	24.91	12.98	6.23	5.62	11.01	4.24	20.96	12.29	8.17	11.25	17.08	9.81	6.64	14.81	5.32	4.42	3.42	20.24	5.43	4.67	5.9	9.74	4.6	3.01	8.73	1.69	1.02	7.12	3.36	1.79	6.45	5.82	43.81	7.12	26.71	2.26	7.6	20.81	10.45	11.48	16.55	7.07	6.74
ENSG00000131966	105.61	141.89	63.07	203.6	55.38	197.14	124.47	181.29	111.4	126.95	131.06	153.34	101.42	108.71	100.68	182.34	135.98	75.51	123.24	110.06	148.8	135.4	119.43	98.23	113.49	140.47	74.37	139.55	81.51	171.83	128.54	152.66	147.11	62.66	133.56	139.69	120.51	133.1	99.87	140.3	89.64	102.06	162.65	129.42	130.8	120.63	129.31	113.29	107.82
ENSG00000131981	8.58	32.99	125.54	286.68	19.04	75.69	136.67	43.87	25.32	31.27	38.81	15.5	254.84	77.04	95.01	61.91	83.03	72.36	72.77	100.81	49.13	25.21	19.99	397.79	37.54	43.66	59.99	151.14	160.48	63.28	85.6	101.97	56.84	124.29	52.67	42.9	90.39	451.47	294.23	42.78	190.29	25.42	124.89	75.75	132.42	150.1	138.27	22.38	216.3
ENSG00000196757	16.31	13.17	5.63	15.97	2.88	8.26	17	14.82	10.58	4.27	12.41	8.31	10.96	0.63	3.34	10.65	3.09	8.15	11.87	5.79	7.46	9.05	7.43	8.49	2.86	5.53	1.07	8.1	1.79	2.77	3.46	12.22	12.06	1.55	9.1	6.06	9.12	12.03	17.39	9.5	11.4	9	16.04	3.01	10.92	8.6	19.33	7.78	7.58
ENSG00000132002	1214.46	111.23	190.66	2251.46	139.43	336.31	364.2	97.64	122.35	141.66	163.86	151.17	350.51	165.55	166.34	128.65	126.45	155.85	121.78	93.97	135.37	112.01	127.92	419.52	174.06	221	238.63	207.82	853.6	192.35	275.6	108.64	129.74	178.9	148.76	169.21	157.76	230.39	183.04	134.22	151.25	134.72	153.82	190.08	196.02	131.05	644.29	269.77	292.7
ENSG00000132003	23.32	11.84	46.73	12.05	9.18	13.53	9.02	7.95	7.82	9.46	10.31	10.25	4.64	11.11	12.61	7.71	4.36	8.9	5.5	5.5	6.32	7.66	6.48	5.45	4.84	5.2	10.39	5.07	8.66	5.36	8.11	4.76	6.25	6.98	2.91	5.86	6.29	7.64	3.33	8.05	8.58	14.37	5.58	7.65	3.02	9.29	6.24	6.21	6.42
ENSG00000132005	17.18	14.3	22.79	9.99	14.62	12.91	13.63	12.49	9.49	12.63	12.58	10.27	12.23	5.8	10.55	8.77	11.66	10.52	7.74	15.35	13.18	7.47	6.88	9.87	5.64	8.09	9.55	6.68	7.81	3.34	11.37	6.43	7	10.31	9.8	10.25	8.49	6.34	10.47	7.3	14.34	13.36	8.33	6.34	13.5	7.18	11.88	13.35	8.55
ENSG00000132109	1.7	1.58	26.68	12.08	1.85	10.39	5.54	6.17	2.81	5.39	3.65	3.95	11.07	4.62	13.23	3.93	4.42	4.1	3.53	7.67	3	1.94	1.05	5.94	3.35	2.4	4.16	4.95	3.99	1.54	4.45	3.81	5	6.43	5.05	1.69	2.98	7.04	10.99	4.94	17.3	4.15	10.29	2.35	3.28	8.79	7.9	3.12	14.36
ENSG00000091157	26.72	26.45	9.49	10.82	32.14	14.47	14.28	19.82	38.7	26.12	23.68	33.83	19.76	20.77	23.42	31.85	41.8	37.46	24.64	44.7	32.61	56.22	57.89	15.46	48.33	24.96	26.44	17.2	20.52	41.03	40.59	31.53	22.57	26.83	38.39	37.51	28.22	13.64	36.01	30.68	20.2	38.93	21.46	62.26	24.28	29.26	15.71	42.66	9.98
ENSG00000173473	23.65	17.9	21.53	11.92	6.74	7.84	10.5	12	7.17	5.98	5.59	8.19	9.75	3.2	5.31	5.09	5.12	9.63	5.85	7.41	4.21	5.79	5.91	6.99	4.55	4.89	2.97	4.77	1.83	4.73	3.89	3.11	6.07	2.46	6.44	6.71	6.92	5.75	8.57	5.99	7.06	7.16	8.05	7.19	6.52	6.37	6.04	4.78	7.33
ENSG00000132164	20.84	53.51	27.94	33.4	63.99	43.14	59.85	32.76	12.68	11.21	17.31	6.57	32.55	18.13	18.99	13.87	11.48	16.04	11.28	14.42	8.75	10.2	4.76	30.24	8.6	4.33	11.27	10.33	14.71	8.13	8.37	4.3	3.18	11.79	2.61	5.08	19.17	25.42	22.36	10.46	19.7	8.4	7.48	14.14	8.63	15.31	17.29	13.05	6.99
ENSG00000132182	4.82	5.31	9.94	6.94	6.75	3.65	8.18	5.77	6.08	5.98	5.19	4.87	7.02	4.09	7.55	4.6	6.12	6.35	6.03	5.94	4.94	4.5	4.44	3.42	3.45	3.59	2.58	4.82	3.92	1.99	4.43	4.13	4.46	3.53	4.4	4.88	6.84	3.15	7.26	4.07	8.93	8.16	5.58	4.25	3.64	5.38	6.86	4.93	4.58
ENSG00000132196	17.31	22.27	20.68	38.76	7.69	14	20.61	14.75	12.91	9.71	13.98	15.53	19.26	6.07	11.66	7.87	9.22	10.05	17.55	13	13.22	7.2	7.53	28.68	7.25	11.01	4.46	11.78	13.44	9.46	11.19	12.26	14.7	6.15	8.7	13.43	7.09	12.22	14.35	12.3	9.84	10.26	16.27	14.39	11.54	18.42	25.29	12.75	10.34
ENSG00000132205	0.85	2.05	9.95	2.14	1.72	4.78	4.75	1.93	2.28	5.39	1.28	1.27	2.51	1.81	2.8	3.17	1	3.07	1.54	2.19	1.13	1.52	0.88	4.34	1.81	0.96	0.83	1.65	2.99	0.46	1.27	2.1	2.11	6.43	2.36	1.18	1.32	7.51	2.42	1.23	6.67	2.23	3.6	4.69	1.96	2.77	2.33	0.69	0
ENSG00000132254	43.3	61.18	54.06	72.12	59.95	60.18	63.93	70.3	61.62	76.8	86.97	79.63	58.84	112.63	68.61	72.37	72.12	56.53	72.44	70.17	66.89	67.45	69.94	54.06	78.39	91.46	102.54	80.32	101.11	80.84	82.29	89.17	76.47	76.67	81.71	71.89	70.03	72.54	56.23	77.41	71.55	74.64	74.95	55.6	91.25	74.08	62.99	76.8	63.5
ENSG00000132275	15.91	12.19	20.76	16.23	12.11	19.49	18.15	20.88	13.91	10.9	12.94	10.86	19.4	14.45	15.03	11.97	8.37	13.67	21.13	12.56	15.64	10.09	10.98	20.47	12.49	10.49	13.44	25.19	17.88	13.84	15.23	9.93	14.41	9.63	13.48	11.25	16.2	14.18	17.84	14.48	14.42	12.3	14.65	22.03	17.76	16.39	20.2	11.21	13.2
ENSG00000132286	15.53	14.47	21.64	30.31	15.72	19.03	36.25	15.88	36.99	44.99	21.74	23.22	34.55	27.21	27.52	33.21	42.28	33.8	44.41	22.57	17.19	45.63	40.21	16.73	49.77	35.12	40.01	17.61	23.75	32.52	48.01	24.44	19.34	34.97	43.34	44.81	34.85	25.79	25.15	14.14	29.41	35.06	42.39	32.26	16.5	38.13	21.37	20.65	30.94
ENSG00000132294	19.4	18.98	6.24	19.27	15.51	21.11	24.03	32.81	60.95	26.98	48.68	57.26	46.14	22.66	43.88	69.59	44.51	65.76	68.95	77.71	64.39	106.48	104.07	36.17	75.95	41.76	26.9	47.13	24.22	87.22	54.72	54.58	54.74	35.54	73.49	85.06	55.67	16.72	69.29	62.36	49.56	89.48	49.77	89.89	69.41	52.51	36.25	55.4	40.12
ENSG00000132300	33.16	27.49	20.74	34.94	10.03	24.09	33.87	32.18	29.09	13.13	34.79	31.89	44.1	11.85	24.05	30.24	18.29	43.02	41.99	39.32	33.42	31.14	32.48	50.13	27.7	25.15	13.78	35.64	9.91	27.71	26.31	25.25	38.7	14.42	41.59	38.2	39.5	29.15	48.16	31.12	42.97	35.45	36.44	43.77	37.32	38	45.1	25.86	34.39
ENSG00000132323	43.16	41.75	47.45	61.82	22.73	69.99	70.98	59.31	38.73	44.56	64.17	47.79	46.94	46.41	52.43	43.94	48.16	53.17	55.56	46.79	47.75	36.89	42.56	47.6	42.89	49.38	41.84	68.57	53.66	40.42	50.05	55.89	71.2	36.53	61.55	51.11	67.76	68.25	49.72	59.13	40.11	48.71	60.65	39.84	55.99	48.21	58.73	51.28	44
ENSG00000132326	11.56	3.17	5.78	11.54	5.95	6.76	13.38	5.79	28	18.12	12.96	20.93	9.45	23.56	11.2	20.43	8.38	14.55	18.77	6.52	14.41	19.52	24.77	9.34	12.33	17.61	13.2	6.88	20.32	16.37	24.8	7.32	6.09	17.45	4.21	17.61	14.36	7.05	6.47	17.27	13.61	33.02	14.31	15.68	4.1	22.59	10.19	27.22	7.4
ENSG00000132329	4.23	33.1	45.45	64.08	31.61	87.03	91.77	49.01	23.64	26.08	92.89	31.61	90.31	108.65	98.88	54.24	57.06	95.09	56.06	61.46	36.49	26.91	28.9	88.83	56.28	60.96	56.01	156.16	83.56	60.06	92.69	65.57	51.71	90.19	61.35	37.86	136.11	143.94	72.5	66.99	103.48	23.86	58.98	70.27	75.98	76.13	120.84	25.95	126.33
ENSG00000132330	2.94	9.86	14.92	11.14	9.96	12.96	9.26	9.02	10.96	7.83	10.45	9.89	9.81	12.02	15.62	11	9.92	14.93	10.89	13.53	9.27	11.15	8.68	9.5	13.04	19.32	11.36	6.43	11.93	10.44	8.67	11.4	14.98	13.58	8.61	12.28	9.89	9.76	10.08	12.04	14.13	10.37	10.7	12.21	8.95	9.62	12.13	6.31	13.17
ENSG00000132357	0	0.44	1.55	0.18	0.48	0.95	2.54	1.41	1.13	1.16	1.01	0.9	2.54	0.61	2.76	1.39	2.03	0.75	2.02	1.38	1.55	1.02	0.48	2.1	1.15	0.44	0.19	0.5	0.73	1.28	0.87	1.05	0.53	1.66	1.01	1.39	0.76	2.58	2.52	1.84	3.85	0.88	3.3	1.08	2.25	1.49	2.64	0.48	0.77
ENSG00000132359	41.21	105.73	18.05	20.82	107.18	41.06	52.57	78.97	156.73	167.64	79.87	120.92	57.04	101.07	127.18	87.12	102.43	92	69.98	79.19	72.04	117.01	109.52	48.83	106.53	51.64	54.59	18.69	77.87	62.53	65.36	33.65	40.12	63.15	58.51	59.03	60.56	11.02	80.33	105.06	71.63	73.64	48.31	55.16	82.53	110.53	25.88	101.42	56.77
ENSG00000132382	29.97	27.89	39.62	37.51	31.86	28.59	40.69	34.31	30.85	30.28	41.98	32.84	44.79	42.76	34.7	48.79	42.74	31.53	49.6	64.4	48.61	46.15	52.6	63.78	40.83	62.67	64.83	57.14	63.3	48.62	52.85	82.84	79.43	67.99	64.74	51.49	66.42	78.83	47.73	49	46.39	58.75	41.63	34.22	67.9	43.63	32.55	56.16	50.24
ENSG00000132386	23.16	60.7	30.25	55.84	102.12	129.8	158.08	154.92	114.2	112.81	181.41	171.66	101.75	269.64	137.44	173.29	120.27	77.7	179.47	124.12	195.07	162.28	141.18	122.8	202.64	165.71	250.32	192.71	263.55	215.86	204.19	218.6	144.55	197.57	186.59	187.48	145.7	188.66	191.08	182.66	59.45	93.12	222.08	264.58	212.26	95.95	136.96	186.51	121.08
ENSG00000132394	18.49	22.19	28.28	10.25	29.08	22.87	24.63	18.14	17.93	21.24	22.72	19.77	17.26	27.92	25.88	19.28	20.5	23.23	20.75	21.85	20.36	17	11.77	17.13	21.34	27.54	25.89	24.1	28.64	18.72	18.76	24.32	19.91	23.4	18.87	15.07	24.02	28.08	22.16	21.93	20.1	16.03	22.43	22.48	20.65	16.61	13.75	20.75	21.56
ENSG00000132406	26.7	22.39	9.96	16.09	3.12	26.98	25.7	20.48	29.03	14.97	17.25	21.62	14.85	21.44	9.46	26.76	16.59	2.42	13.01	22.64	6.65	6.54	16.59	16.18	4.94	16.98	0	22.7	14.13	10.94	26.26	24.75	11.34	9.49	24.21	17.93	11.72	22.17	20.98	20.06	20.42	7.53	30.36	13.87	15.48	16.39	6.36	10.24	19.94
ENSG00000132423	29.83	17.49	12.6	36.09	9.18	40.11	31.07	24.31	15.82	17.95	22.56	20.3	22.66	11.47	16.5	26.06	22.74	24.81	25.53	17.98	28.02	17.81	22.15	24.1	23.31	38.87	21.42	38.18	20.03	28.22	23.72	27.47	45.97	10.35	38.17	38.22	31.51	23.56	15.8	24.65	19.71	39.42	26.48	36.27	29.52	26.8	20.33	20.09	40.22
ENSG00000132429	18.44	5.16	2.2	12.7	2.58	11.52	5.16	8.8	4.01	4.14	19.06	11.95	9.02	9.69	7.19	12.81	4.58	15.38	12.22	22.78	11.02	22.12	26.92	17.13	22.72	39.88	24.43	34.94	9.11	39.79	22.8	39.79	36.95	3.93	40.65	39.62	30.22	35.21	6.32	5.04	9.67	20.29	8.95	22.98	26.19	10.56	21.66	18.67	24.79
ENSG00000132434	15.52	51.07	23.53	16.04	68.89	39.49	35.52	43.14	53.4	55.9	47.44	45.21	32.4	43.92	49.49	56.15	56.38	41.14	47.48	30.08	49.14	37.7	41.91	26.05	52.97	36.96	36.02	34.23	39.6	35.54	40.93	24.15	17.03	35.22	36.31	34.21	27.25	13.38	36.16	48.27	30.26	33.69	30.41	47.12	34.25	42.5	27.29	39.56	26.75
ENSG00000132467	27.48	28.85	21.44	73.79	15.46	25.56	34.95	36.32	40.07	25.47	42.03	48.91	32.94	21.95	19.08	53.96	30.27	38.65	42.43	36.68	46.54	47.78	44.95	33.08	37.6	35.2	31.78	44.7	24.15	56.68	36.88	37.44	46.49	28.31	41.94	48.21	37.09	42.37	48.08	51.17	39.7	49.06	55.78	34.95	51.04	41.77	31.7	40.96	42.73
ENSG00000132475	339.96	401.05	1303.73	1735.4	158.85	515.66	477.4	350.99	296.66	374.62	312.32	389.73	524.61	261.65	408.01	322.45	475.9	349.25	510.3	414.13	497.06	240.53	217.32	628.77	281.89	534.95	267.54	460.24	629.64	386.46	469.4	427.96	348.44	586.77	373.96	402.34	425.53	1288.86	680.56	356.43	556.44	299.44	1733.99	236.75	292.73	471.2	426.79	323.16	713.32
ENSG00000132481	13.06	16.73	230.71	134.95	26.97	41.5	53.68	29.87	15.7	26.46	23.14	12.18	89.98	34.2	32.24	11.93	25.13	15.59	23.98	41.43	18.18	13	10.73	168.51	20.15	21.44	32.56	44.63	27.36	23.02	20.36	24.71	37.78	36.24	19.75	15.34	26.88	122.77	102.09	22.79	50.08	18.78	35.26	14	29.3	44.48	23.81	13.44	28.95
ENSG00000132510	79.34	38.64	99.06	28.43	25.11	14.46	25.09	16.03	20.37	19.19	19.95	13.31	19.79	11.58	15.19	11.11	13.52	13	15.72	16.2	11.68	9.79	10.24	17.45	8.52	18.31	8.12	10.1	29.01	7.69	35.06	11	12.61	15.58	10	13.37	15.17	15.8	19.02	10.49	18.31	17.33	24.35	18.61	12.52	16.63	18.59	15.8	12.43
ENSG00000132561	1.48	9.46	15.6	34.96	4.02	10.25	14.13	8.7	12.54	11.65	4.99	7.69	12.41	3.12	10.31	5.87	10.75	18.95	10.88	9.92	9.85	7.56	10.7	8.63	7.32	5.54	5.24	6.92	5.03	4.7	9.68	6.6	11.09	14.98	10.93	8.33	10.25	48.05	19.85	6.16	16.86	7.2	18.9	8.63	6.02	9.23	13.01	5.65	9.75
ENSG00000112983	43.42	39.4	30.23	28.54	25.04	22.62	33.7	30.95	30.68	29.63	42.48	32.39	31.57	22.6	24.62	30.24	26.61	36	34.64	45.56	34.76	33.41	31.91	41.5	29.11	29.67	27.21	34.96	19.44	32.53	31.94	37.14	40.62	21.7	36.14	38.66	36.3	30.49	36.16	31.72	34.7	40.61	31.3	24.74	45.88	34.93	37.03	30.6	29.65
ENSG00000132570	10.46	1.46	18.73	10.8	1.22	9.61	9.15	7.13	8.12	2.93	1.69	0	11.63	3.05	7.41	8.38	9.28	9.48	0	2.53	1.74	5.12	3.25	4.22	6.44	2.22	1.92	12.7	7.38	5.71	8.81	7.05	7.1	5.57	7.29	4.68	7.65	6.51	17.93	5.71	18.27	1.48	9.51	0	1.52	8.56	4.98	4.81	7.81
ENSG00000132591	44.25	47.77	52.49	43.19	50.83	55.12	51.64	51.54	40.1	55.14	70.29	55.74	67.28	62.1	66.64	49.94	41.47	58.41	56.56	54.2	48.56	46.95	49.26	50.66	59.39	42.74	69.21	61.52	57.69	54.73	56.31	61.75	60.13	54.19	61.74	43.66	55.76	47.97	49.88	49.7	51.03	59.67	43.99	30.64	64.84	51.31	69.48	41.49	60.6
ENSG00000132603	14.13	9.03	15.67	29.21	5.66	23.75	8.48	16.52	12.54	23.77	10.44	27.17	19.76	8.25	15.74	20.51	20.08	8.79	14.17	20.54	24.13	18.78	20.07	13.05	14.93	15.41	22.29	17.66	22.8	25.37	18.16	10.89	16.46	10.05	11.27	22.9	14.18	16.76	15	22.06	12.35	19.37	15.92	33.55	15.21	11.57	12.82	16.11	27.15
ENSG00000132604	53.89	54.31	40.13	30.71	48.18	32.27	34	35.38	39.68	31.71	32.67	33.15	34.93	40.41	39.6	42.32	43	50.19	31.13	39.32	45.05	42.67	45.88	32.25	41.98	37.8	53.37	31.03	37.09	46.88	45.24	43.06	39.77	45.41	39.35	38.52	35.82	50.81	30.8	38.89	41.86	45.06	31.07	22.11	38.95	51.72	29.15	42.05	30.81
ENSG00000132612	166.78	183.71	230.52	166.09	271.44	212.58	197.23	235.91	200.63	261.62	228.41	218.51	187.88	328.3	230.17	238.71	252.86	199.37	226.51	215.16	265.82	235.48	241	234.69	281.13	289.76	377.41	282.27	320.93	303.35	239.78	281.33	327.6	285.1	252.03	265.84	253.71	259.29	196.34	256.96	214	259.46	200.01	236.14	275.16	236.17	187.63	225.76	223.01
ENSG00000101384	7.98	7.14	16.34	20.41	6.71	14.58	23.14	10.1	13.74	10.1	6.33	8.18	14.2	5.86	14.7	7.68	16.68	9.92	24.35	18.22	19.07	7.92	5.1	18.42	6.41	5.8	3.86	9.08	11.26	5.11	18.83	11.07	5.73	26.25	7	4.08	6.14	11.73	18.24	6.35	17.93	7.33	50.87	6.63	7.27	8.58	9.26	5.18	20.09
ENSG00000132622	1.57	4.82	12.4	2.7	5.31	14.4	12.62	12.02	11.93	18.02	9.11	9.37	9.42	12.13	22.49	6.07	14.75	7.11	14.67	13.1	15.61	6.72	5.11	12.35	6.18	4.98	7.5	14.47	3.32	4.28	7.05	16.65	8.25	18.11	6.12	8.89	8.49	4.55	4.7	12.42	20.55	8.18	29.71	6.51	9.77	6.41	5.23	16.83	16.39
ENSG00000132639	583.95	416.69	111.06	484.68	276.5	866.12	553.62	1736.89	1788.09	2174.55	2139.28	2707.06	1727.92	1405.11	1575.99	3243.55	2370.13	1921.8	3071.08	3227.29	3404.53	4061.88	4163.79	2145.86	3515.28	4290.5	2796.74	3748.76	1303.39	4777.22	3018.18	4128.46	5746.61	1434.1	4383.11	4435.93	3725.93	2533.13	1601	2583.48	1735.66	5128.52	2169.04	3798.39	3209.86	2280.9	1556.88	3352.64	2037.99
ENSG00000132661	40.1	27.76	92.35	69.71	13.38	39.3	42.78	24.73	16.61	29.98	28.37	15.22	27.19	28.99	23	20.41	20.34	16.62	13.4	22.2	12.68	7.48	14.24	29.31	32.94	17.81	28.1	27.83	56.6	28.16	27.9	41.2	31.13	54.3	19.18	19.38	23.47	33.29	28.37	20.86	25.03	14.01	57.9	15.86	18.81	25	18.19	9.37	48.49
ENSG00000132669	5.41	13.06	16.5	16.09	5.99	13.19	19.75	13.79	10.27	13.74	12.15	8.38	20.28	7.49	16.15	10.66	13.15	27.28	12.89	13.53	7.75	6.14	6.73	34.07	7.44	6.52	7.76	14.67	8.24	7	12.17	6.92	6.97	15.19	8.11	8.33	13.17	19.16	28.33	7	27.89	8.36	24.71	23.67	13.87	18.88	21.17	9.27	13.19
ENSG00000132671	0.69	1.93	0	0.95	7.44	0.51	3.39	2.36	5.59	2.72	4.02	2.07	3.08	8.49	13.73	4.07	8.85	9.04	6.48	2.68	3.22	2.71	2.58	2.24	3.07	2.35	5.09	5.38	4.88	4.54	4.28	0.47	0.94	3.94	3.86	1.65	2.03	1.72	6.72	6.43	11.49	1.17	3.36	2.88	0.8	3.96	1.76	3.82	2.07
ENSG00000132702	23.08	23.65	16.65	19.21	0.45	21.91	14.81	19.66	16.73	97.58	164.61	98.7	33.37	16.28	25.89	17.99	12.97	118.57	24.74	116.92	17.23	23.54	14.34	39.62	26.54	120.68	29.01	43.92	12.89	28.36	25.94	129.66	105.82	18.46	78.88	180.21	132.24	267.42	19.78	27.84	21.85	92.79	23.91	11.98	61.3	11.02	41.52	37.17	110.59
ENSG00000132740	12.53	12.1	12.24	11.25	16.86	6.98	9.3	12.43	11.56	11.07	13.98	11.73	9.8	13.97	11.57	11.77	12.14	9.64	7.7	13.43	14.12	10.97	11.32	12.27	12.35	14.81	12.3	10.7	17.95	8.92	12.59	15.36	9.03	16.47	12.29	9.07	15.11	11.35	16.06	12.65	11.61	15.22	11.97	12.62	17.39	6.84	12.78	14.45	8.51
ENSG00000132768	25.84	25.29	34.73	66.76	27.17	33.25	45.24	48.45	44.16	57.96	70.96	51.52	51.75	64.15	41.21	31.08	59.65	42.18	90.7	46.95	42.9	41.12	32.11	57.43	31.85	76.71	52.31	56.51	54.72	45.89	58.1	69.7	35.12	41.34	50.48	61.71	26.47	64.37	48	60.01	11.29	43.76	54.86	0	44.94	58.16	36.93	55.51	86.87
ENSG00000132801	11.2	9.29	5.54	13.04	6.86	7.38	8.92	6.85	6.96	9.75	8.73	8.08	8.94	8.35	8.21	7.23	5.49	7	6.02	7.49	6.67	7.19	7.92	4.99	9.33	5.57	8.24	6.01	7.09	6.33	9.77	8.59	8.4	5.49	5.82	5.07	4.97	5.13	7.73	5.28	8.78	7.85	7.26	8.02	7.16	6.01	9.57	7.82	5.77
ENSG00000132823	66.16	38.02	55.97	75.32	17.17	51.33	42.46	40.71	42.81	42.25	39.77	40.29	39.25	42.39	31.25	56.97	38.5	44.66	52.31	55.2	43.31	40.94	47.95	64.59	43.94	67.79	52.07	58.93	47.99	60.73	55.77	63.81	65.54	41.15	59.99	57.59	57.54	65.6	59.86	40.16	46.58	40.45	67.43	53.44	56.45	54.89	62.44	38.34	61.76
ENSG00000132837	0.38	1.68	0.22	4.39	0.88	0.55	2.36	1.53	1.17	0.63	1.45	1.5	3.67	0	2.13	2.41	1.6	1.63	2.05	2	2.24	2.39	0.7	1.82	0.74	3.18	0.55	1.82	0.79	1.43	1.48	2.53	1.27	0.53	1.05	0.9	2.85	3.74	2.14	2.46	1.31	0.21	2.28	1.56	1.3	2.76	2.14	0.92	2.8
ENSG00000132840	0	0.41	0	0.51	0	0	3.11	0.5	0.46	1.66	2.87	0.37	6.58	0.86	3.67	1.58	1.58	2.15	6.92	3.58	3.93	2.17	4.14	10.76	0.36	3.14	0.54	0.72	3.13	1.21	3.33	4.49	1.51	6.31	3.3	1.32	2.16	1.84	4.65	1.62	3.23	0	9.87	3.07	5.14	3.03	10.33	2.72	8.84
ENSG00000132842	6.21	4.07	3.22	5.02	2.02	3.97	6.61	3.68	2.51	3.03	6.45	6.45	8.4	2.05	3.25	6.2	1.92	8.81	5.05	6.41	3.4	4.62	2.51	7.63	3.72	3.2	1.59	4.72	2.09	4.72	4.25	4.18	4.77	1.92	4.52	6.44	6.32	6.95	8.79	3.98	6.13	5.03	6.55	7.85	7.82	7.73	7.03	4.47	4.43
ENSG00000132872	432.89	536.75	20.76	69.65	301.49	68.29	51.32	98.23	175.11	76.89	123.3	177.93	66.36	60.16	37.62	173.96	68.67	83.44	110.89	151.25	143.07	261.14	245.79	36.25	144.86	115.76	55.35	105.02	36.13	207.14	97.32	155.53	81.57	48.07	191.5	170.13	122.43	52.47	149.52	156.4	75.11	175.12	109.23	191.66	127.84	84.82	44.55	169.08	34.93
ENSG00000132952	63.49	21.59	9.55	107.25	9.26	29.12	29.52	27.88	20.99	6.98	23.79	23.03	23.96	8.6	8.1	18.33	9.2	15.48	26.34	22.64	24.62	18.78	21.3	24.22	11.02	18.52	7.29	19.99	7.35	21.51	11.13	24.49	27.61	5.24	23.39	19.86	20.36	17.08	21.48	22.76	21.31	25.23	25.11	26.38	26.06	22.86	30.16	21.2	22
ENSG00000132953	1.64	1.83	0.98	3.06	1.64	2.06	3.27	2.23	3.19	1.31	1.96	3.61	1.66	0.55	2.82	2.75	1.66	2.03	3.46	4.64	2.48	3.32	3.05	2.64	1.96	1.78	0.69	3.86	0.82	2.17	2.1	1.42	1.43	1.5	2.22	2.09	2.87	2.72	5.08	1.79	2.45	3.03	3.26	1.94	2.57	1.72	3.41	2.15	1.05
ENSG00000133019	13.67	19.36	2.72	5.02	23.84	11.38	19.45	15.84	30.85	22.99	25.9	29.06	17.84	19.15	16.14	27.03	38.82	23.46	28.42	24.72	30.24	39.03	41.89	6.63	35.26	20.47	23.13	20.36	21.54	23.39	30.98	13.51	13.62	15.87	24.4	25.02	17.06	6.05	26.55	24.89	13.54	26.74	10.77	60.56	23.5	29.82	12.15	34.38	8.17
ENSG00000133027	13.63	19.05	23.74	31.3	31.85	27.55	25.45	26.33	19.76	26.75	22.02	22.08	21.23	39.8	26.56	21.25	22.59	17.3	15.95	11.01	17.35	15.57	14.11	20.19	17.36	26.97	26.75	20.97	20.04	9.93	24.9	20.68	13.89	21.8	18.38	22.38	25.93	45.27	17.53	19.24	20.85	15.39	23.42	28.32	13.83	22.31	18.76	17.43	27.15
ENSG00000133028	13.37	19.94	18.1	22.72	12.5	13.11	16.23	11.55	14.95	15.49	18.43	16.88	11.11	14.06	13.27	20.01	15.19	12.93	18.07	19.87	12.43	13.53	11.63	12.24	14.06	12.85	9.18	7.8	8.81	18.51	14.53	21.04	15.75	8.24	16.42	16.5	16.7	22.94	12.74	17.53	9.35	10.57	18.92	11.11	12.92	13.13	10.19	17.5	14.65
ENSG00000214899	184.02	165.78	225.89	147.89	229.3	443.37	365.04	285.75	241.36	269.42	264.2	285.29	300.22	256.73	391.21	234.97	290.43	266.98	342.82	217.93	352.94	245.26	266.77	256.08	211.67	208.08	218.19	268.25	382.41	279.24	212.6	199.9	347.27	232.58	176.87	238	221.39	161.27	216.18	189.9	321.66	161.56	198.4	169.89	260.73	359.76	357.08	175.65	412.34
ENSG00000133048	2.8	1.18	203.05	32.36	2.62	11.34	3.93	10.51	6.53	5.9	7.7	6.99	56.77	5.73	4.97	9.37	1.99	4.58	1.09	129.75	8.38	6.52	10.02	1194.71	6.57	12.49	18.57	14.99	14.35	18.38	13.79	20.33	29.05	4.98	17.61	16.32	42.26	1118.72	152.65	6.13	10.42	7.52	5.53	17.48	20.32	5.16	249.33	12.48	14.66
ENSG00000133101	41.02	30.04	10.35	58.9	41.03	55.63	40.04	42.54	35.53	39.52	30.61	32.82	31.87	34.75	20.88	39.52	46.77	19.7	37.84	19.87	36.82	30.27	31.94	19.61	40.16	22.05	31.46	32.56	30.99	37.87	34.09	31.94	28.26	21.77	32.89	25.52	27.73	13.91	14.86	38.19	18.18	22.82	28.03	33.6	26.12	29.31	22.38	36.51	12.94
ENSG00000133111	7.89	4.41	4.12	5.43	3.23	2.9	15.19	10.08	9.19	3.87	7.65	6.88	1.76	2.3	4.89	2.11	8.4	6.44	6.15	6.69	7.2	9.17	5.51	5.58	4.38	10.87	7.26	4.79	2.78	8.62	4.99	5.32	3.35	4.91	6.6	5.3	6.93	9.82	7.33	8.08	6.89	7.79	8.97	16.39	7.43	8.07	6.26	6.66	10.31
ENSG00000133243	213.76	262.45	229.63	227.7	429.38	306.14	292.37	270.41	334.74	393.54	289.02	215.23	360.83	385.44	496.59	247.94	320.06	476.38	270.67	244.48	250.91	199.6	251.24	357.9	298.74	291.54	327.6	193.81	432.36	271.46	281.77	310.54	300.17	378.36	242.89	205.86	332.75	312.85	270.77	254.03	368.82	231.33	212.5	141.9	301.45	382.33	305.78	256.25	516.82
ENSG00000133247	23.11	28.8	42.59	25.02	9.57	25.24	30.98	32.41	17.23	14.44	34.13	16.78	21.16	7.71	13.1	15.18	11.26	11.02	19.57	27.19	10.96	9.38	14.36	18.14	5.21	13.44	6.8	17.97	10.25	7.94	8.91	17.37	13.46	7.04	13.64	12.61	21.64	10.97	17.74	22.37	20.2	16.03	23.23	0	11.1	12.43	19.29	22.69	17.76
ENSG00000133275	61.04	44.49	93.73	74.33	61.11	98.54	86.99	96.6	103.6	105.11	89.43	76.04	89.23	113.3	161.43	74.57	65.02	109.11	62.9	69.7	85.39	58.17	63.65	91.59	73.07	78.57	74.6	57.2	98.46	71.45	78.41	74.96	62.94	86.79	57.78	76.77	76.55	57.01	40.49	75.03	128.6	68.28	66.1	18.11	65.07	90.98	53.99	74.24	151.42
ENSG00000176225	6.29	3.24	2.96	2.91	1.53	4.09	4.57	4.45	3.76	1.08	4.84	4.46	3.44	0.56	2.66	2.78	2.66	3.42	6.41	3.46	4.98	3.91	3	1.76	1.37	3.28	0.27	3.76	1.02	1.32	2.11	4.24	2.63	1.2	4.59	3.82	3.25	2.11	4.28	3.37	2.64	3.41	6.23	1	3.78	4.55	2.53	4.38	4.15
ENSG00000133315	14.86	13.39	19.73	8.53	7.72	10.93	5.2	7.32	4.62	8.8	11.2	1.23	2.94	6.75	8.19	2.21	7.62	5.99	4.51	9.2	3.84	2.43	2.57	13.35	4.07	3.5	4.25	4.01	6.41	4.06	6.03	22.27	11.78	7.63	8.3	3.94	13.05	22.63	6.14	4.96	3.61	4.66	6.51	6.86	9.57	3.38	4.72	3.55	3.7
ENSG00000133398	160.34	150.53	105.21	240	63.82	157.15	83.15	155.19	115.6	165.38	168.82	176.57	91.6	172.25	141.68	133.31	118.09	127.8	140.48	149.61	122.22	146.35	127.91	134.36	138.57	172.91	134.03	186.6	97.79	161.13	104.58	178.85	195	90.07	184.49	187.88	121.65	136.41	108.6	142.75	103.8	120.66	152.46	106.91	198.5	152.28	129.48	138.47	192.21
ENSG00000100147	2.34	3.27	8.39	4.03	3.83	1.72	5.74	4.79	2.18	7.22	0.76	5.83	3.12	2.05	5.81	1.88	2.49	7.64	0.91	5.67	3.11	2.29	2.18	3.78	6.92	0.99	2.58	3.41	3.3	1.28	1.97	5.52	1.59	4.16	2.61	2.1	5.48	0.97	4.68	1.28	6.14	6.61	4.26	4.86	5.43	0.96	2.23	2.15	5.25
ENSG00000241973	35.39	26.9	27.74	16.95	45.22	28.66	29.04	37.04	55.83	81.78	69.58	73.51	54.13	82.51	56.23	78.33	98.19	77.42	69.65	88.95	105.09	117.5	125.06	61.21	121.04	88.17	127.28	60.06	126.26	93.12	109.4	70.38	72.13	123.84	84.25	84.09	80.99	46.03	73.32	92.37	51.35	85.51	51.31	86.73	94.96	71.05	54.78	96.79	45.23
ENSG00000133574	4.08	8.21	14.13	10.68	1.52	21.59	9.14	17.24	25.85	12.35	12.12	16.26	29.04	7.15	20.81	20.49	23.76	28.41	35.63	18.97	40.08	15.18	10.64	14.5	11.26	11.07	7.8	24.58	5.18	14.26	7.79	26.4	16.07	20.88	21.4	20.45	12.41	39.96	54.08	27.19	50.62	11.97	90.54	10.17	27.43	30.04	36.78	9.51	51.18
ENSG00000133606	174.44	169.71	146.52	135.13	106.29	114.6	107.81	120.22	124.25	160.86	114.35	141.05	110.31	117.54	115.92	142.42	142.95	125.61	134.54	119.18	129.81	136.71	132.99	96.55	133.87	144.14	143.89	118.6	117.7	166.5	140.42	134.85	155.4	108.57	142.63	137.31	112.94	101.85	113.57	127.76	118.95	147.13	136.4	116.8	124.81	134.39	127.01	124.68	112.63
ENSG00000133619	11.5	14.03	22.94	15.84	15.63	17.87	23.42	25.12	18.84	21.84	16.72	18.63	27.45	19.84	29.08	14.67	20.79	22.18	16.51	24.44	19.61	18.04	20.62	27.46	17.91	22.39	17.89	22.1	19.55	14.71	19.1	28.2	36.05	17.65	24.51	18.88	31.36	27.78	16.58	18.71	27.87	23.75	19.18	8.69	23.33	21.82	12.95	21.33	31.63
ENSG00000133627	98.31	149.81	36.45	96.93	108.08	135.55	132.7	150.24	124.14	161.04	136.16	144.4	110.35	133.21	112.92	150.08	189.37	90.89	157.83	87.47	167.21	122.37	124.95	69.05	148.87	125.87	112.54	115.52	96.59	120.74	143.01	69.75	95.16	97.75	102.19	88.98	75.21	45.34	78.21	161.12	64.58	117.85	103.26	80.08	102.79	126.2	114.66	147.46	90.22
ENSG00000133639	128.35	67.39	300.97	78.71	23.4	51.77	72.33	45.88	57.37	32.47	38.43	30.42	65.46	21.94	59.9	30.95	42.24	86.29	65.91	51.56	57.15	26.06	32.09	65.76	37.04	67.7	48.38	91.27	97.21	41.9	130.2	62.27	37.22	109.05	59.4	45.78	42.14	111.76	89.45	37.62	108.07	44.17	136.69	65.03	49.9	48.68	90.45	34.58	60.79
ENSG00000133703	11.34	17.43	5.08	8.78	11.26	4.17	6.94	11.59	21.13	1.59	4.58	7.77	5.04	4.96	3.01	7.57	6.04	7.2	2.21	8.24	10.35	12.49	11.44	5.72	5.59	7.21	3.13	4.13	1	7.74	4.78	10.51	2.89	3.02	7.12	4.23	9.12	2.35	14.58	6.97	3.72	8.8	10.31	17.66	7.39	4.64	4.5	9.56	0
ENSG00000133704	6.22	6.82	5.11	6.61	3.64	8.01	10.9	7.07	11.76	6.11	8.04	9.18	13.16	2.88	7.72	9.01	6.82	13.92	9.1	11.69	9.3	10.92	12.09	8.8	7.03	3.96	2.1	5.29	2.2	7.65	8.45	8.39	5.99	3.13	7.96	7.9	10.02	5.17	13.04	7.65	8.39	9.37	7.86	11.85	10.97	13.16	6.59	10.03	6.97
ENSG00000147588	10.12	14.71	24.18	40.44	4.73	17.85	59.52	52.44	32.7	9.08	15.69	22.19	131.49	18.91	24.39	50.85	12.94	101.32	63.14	44.13	29.56	22.79	26.41	137.39	11.97	13.73	11.92	72.78	12.86	40.91	20.48	17.74	31.63	7.2	46.31	42.29	54.5	159.65	146.92	13.27	148.6	28.56	45.42	151.37	18.77	72.89	64.27	34.78	127
ENSG00000133740	20.89	11.25	25.41	9.06	3.25	14.78	15.17	13.71	8.65	7.81	4.5	13.11	11.7	3.61	7.67	12.82	10.99	6.17	9.65	6.37	6.16	9.47	6.73	9.38	6.48	4.59	5.69	11.28	4.37	5.92	7.39	4.17	4.2	5.5	9.93	6	7.24	7.71	11.94	9.3	10.82	6.99	12.67	16.07	6.73	9.5	11.79	9.02	3.47
ENSG00000133773	33.37	18.66	17.94	54.41	6.76	34.34	31.93	26.54	31.1	7.49	16.53	24.39	26.73	7.8	7.88	30.92	14.22	32.28	28.63	26.95	17.73	17.97	20.04	22.47	7.13	26.42	10.64	35.68	14.13	18.23	12.51	34.5	36.28	6.33	25.45	33.2	18.88	33.25	20.98	26.74	33.06	28.88	37.78	27.73	39.33	21.85	39.56	19.8	48.19
ENSG00000133800	0.83	11.65	4.48	30.43	5.45	7.96	11.09	1.7	19.16	6.08	4.85	3.32	16.32	0.49	15.36	1.34	5.33	9.67	1.95	3.23	2.21	16.32	3.11	4.71	4.52	4.95	1.84	2.43	23.53	3.64	16.86	1.12	2.26	45.63	1.4	4.98	2.93	17.3	12.86	2.28	6.56	0.47	52.57	0	2.42	4.77	15.88	2.05	0
ENSG00000133812	29.53	17.41	12.84	12.05	8.92	8.37	14.83	10.5	9.67	4.32	7.05	8.72	9.28	2.44	5.57	7.03	4.79	10.48	9.89	8.79	5.54	7.7	7.08	8.3	3.96	4.63	2.01	5.61	2.83	3.77	5.86	7.14	5.89	3.42	8.06	5.46	6.95	8.93	15.22	7.19	10.66	5.8	8.86	8	7.53	9.32	8.25	7.29	8.39
ENSG00000133816	18.9	49.11	6.72	59.67	53.9	84.43	64.34	123.33	104.81	111.9	127.86	146.68	73.89	126.2	95.98	136.86	106.9	67.53	87.71	103.18	126.62	135.09	143.33	89.72	119.62	107.15	154.1	96.05	90.86	104.84	84.33	79.87	137.37	77.92	103.63	113.7	121.43	62.98	67.29	137.27	69.44	179.09	83.74	105.38	131.08	84.02	77.35	127.31	102.95
ENSG00000133874	31.06	9.65	83.47	34.48	4.03	2.54	6.04	2.35	7.51	7.74	6.69	4.3	6.14	6.05	2.45	3.69	1.23	2.5	5.38	1.67	4.58	0	1.07	16.73	0.85	7.32	7.62	3.35	18.27	3.77	12.61	1.16	3.52	4.91	3.85	2.06	3.03	5.73	8.88	0.94	4.52	3.9	11.51	14.34	1	4.24	3.29	3.18	0
ENSG00000133878	237.47	254.91	153.94	272.93	263.46	300.56	200.93	292.61	253.25	265.59	288.79	180.98	203.41	365.61	259.17	245.71	272.37	186.08	234.7	206.72	183.79	139.89	160.95	173.41	196.56	201.39	200.93	252.99	219.58	204.65	206.27	288.55	219.13	179.66	170.79	189.5	216.28	239.33	209.01	230.33	173.13	168.42	170.2	168.82	239.96	194.34	224.19	191.69	176.42
ENSG00000133935	76.37	101.42	71.83	127.58	131.15	157.19	117.64	145.78	99.64	113.48	81.41	92.29	79.86	165.03	85.24	109.2	153.23	60.94	119.12	61.05	105.21	92.55	80.67	72.51	129.89	103.63	134.89	98.34	137.45	116.82	91.22	69.52	97.28	78.73	89.51	99.16	87.16	82.43	64.38	87.62	75.09	82.97	82.21	55.53	74.15	82.82	93.37	87.87	105.53
ENSG00000133943	32.12	52.28	32.2	56.51	58.7	110.47	104.42	99.33	60.58	65.29	80.79	40.3	132.72	97.82	99.18	84.31	72.51	96.12	70.68	75.59	66.64	48.3	59.16	133.48	64.47	53.02	88.23	103.13	102.83	70.82	77.05	76.97	74.82	78.71	78.75	66.08	87.29	94.29	95.07	73.33	113.3	66.37	70.97	57.19	99.41	101.4	95.8	73.92	96.83
ENSG00000213463	20.28	27.84	9.91	19.05	8.62	25.75	24.53	36.45	20.62	16.54	21.44	23.89	8.2	16.15	26.13	26.61	14.41	24.08	25.88	14.29	14.69	22.57	17.18	22.35	14.54	9.38	21.71	21.5	14.32	17.12	18.65	13.68	15.03	19.66	16.46	19.81	18.35	12.25	22.13	13.1	24.17	21.85	22.37	15.32	32.06	24.14	23.42	12.45	30.3
ENSG00000133985	67.56	108.18	47.68	44.42	104.75	92.55	51.6	60.71	64.87	58.54	69.44	59.68	38.26	57.39	76.17	59.09	71.97	60.15	52.69	46.12	42.81	42.1	59.15	37.22	71.15	52.09	42.94	35.81	41.18	72.14	70.77	33.13	47.98	43.66	56.55	47.66	39.54	35.69	40.37	58.72	32.21	41.6	70.77	51.03	56.96	90.47	62.41	41.46	36.7
ENSG00000134001	53.67	46.21	55.96	63.38	29.46	53.23	41.75	51.69	53.46	42.04	45.13	66.65	59.13	25.37	31.39	59.2	50.22	58.09	55.81	56.96	53.73	60.9	63.52	50.25	56.7	46.24	31.35	60.44	29.46	79.12	53.63	50.55	54.41	30.28	72.74	65.6	60.33	45.98	60.37	52.13	64.03	62.03	66.65	67.25	79.01	64.14	55.19	53.32	58.54
ENSG00000134014	39.79	28.02	29.34	26.06	26.63	27.81	28.89	23.78	32.05	38.84	32.06	31.82	44.15	26.11	28.55	42.28	31.75	40.63	39.46	37.61	46.64	34.88	39.07	27.79	53.04	42.08	53.15	37.24	35.02	56.89	44.18	35.77	41.72	39.47	45.79	44.28	35.08	33.85	43.24	38.65	38.64	36.04	26.22	48.98	45.56	36.18	29.33	26.23	25.69
ENSG00000134020	0	5.28	3.53	0.81	4.41	5.21	5.79	4.02	8.8	5.96	9.15	6.47	14.71	22.76	11.71	6.31	9.22	14.56	15.65	9.15	16.46	8.67	5.87	17.17	4.66	6.01	12.17	10.33	16.67	12.9	20.57	29.46	8.02	12.59	13.18	10.57	16.59	18.63	4.72	13.55	17.54	5.33	12.89	19.62	10.27	17.39	12	9.42	5.29
ENSG00000134046	20.95	40.34	48.65	60.13	9.24	45.34	57.03	46.81	47.72	30.67	28.57	47.55	64.21	10.19	35.46	36.7	28.93	46.43	39.02	37.78	49.45	46.72	36.15	42.31	40.73	26.65	29.98	47.5	19.71	40.69	33.36	48.65	45.06	34.75	50.01	32.65	33.37	62.8	57.2	37.51	46.79	34.81	65.64	24.17	51.94	42.86	40.65	34.28	59.11
ENSG00000134049	71	19.85	53	79.48	29.03	45.67	18.64	114.96	71.68	54.74	51.61	53.07	39.49	25.92	25.16	52.18	31.52	45.07	48.45	55.9	41.25	21.73	49.63	57.37	43.75	67.74	39.19	77.63	6.26	53.33	39.91	53.86	72.35	37.86	44.58	52.98	46.75	88.42	50.72	33.94	46.54	95.17	75.36	0	77.17	58.11	90.18	59.91	39.77
ENSG00000134056	64.72	50.66	27.82	74.89	21.77	74.21	63.43	61.77	27.34	47.9	48.5	56.76	46.07	39.31	53.2	69.18	33.09	46.95	58.54	37.62	41.25	36.75	43.42	54.38	39.56	92.2	38.1	70.44	40.19	67.88	46.56	61.09	82.65	27.61	70.79	57.17	43.94	58.03	50.3	46.67	36.2	46.75	65.94	32.26	67.52	69.91	55.89	41.3	77.34
ENSG00000134057	4.96	3.12	21.86	10.68	3.19	10.03	8.25	7.61	5.4	7.3	13.63	9.89	9.38	10.14	7.03	9.95	9.25	5.4	12.09	8.41	13.18	8.2	10.02	9.02	11.01	14.73	16.89	9.04	9.63	12.88	10.11	14.64	10.96	3.53	9	12.59	12.71	7.21	7.44	7.79	7.05	6.3	11.29	7.73	16.18	11.17	12.61	12.18	5.56
ENSG00000134058	10.09	7.37	7.88	15.5	2.18	14.83	14.67	17.45	8.68	5.22	8.02	8.12	13.12	4.08	4.95	9.54	8.27	7.88	10.89	10.15	10.82	6.08	6.75	15.67	10.71	7.24	6.28	11.31	6.02	13.14	8.29	8.37	11.6	3.86	12.99	11.58	8.63	14.17	9.31	13.99	9.49	12.26	15.53	6.45	12.14	11.43	13.3	11.43	11.59
ENSG00000134072	64.58	114.83	66.3	196.95	100.02	185.09	158	159.29	105.49	133.05	139.71	143.19	85.24	157.22	95.13	121.01	112.35	65.8	104.69	68.2	107.91	89.89	66.27	65.67	75.48	97.85	91.32	112.13	99.35	70.16	73.41	78.77	115.36	57.26	73.7	73.2	90.89	56.63	63.87	134	78.64	128.6	107.38	48.23	100.53	86.11	82.49	122.9	114.9
ENSG00000254999	483.21	482.47	787.34	675.24	341.9	882.88	633.11	828.24	634.71	1045.04	771.54	915	632.71	1205.36	890.29	922.4	720.67	640.96	834.4	484.92	802	773.95	656.18	647.01	748.64	989.35	853.47	798.3	1027.95	863.55	927.26	772.62	947.3	952.08	878.33	861.18	626.21	613.22	654.88	773.11	494.7	666.2	849.84	716.95	944.27	999.92	701.4	745.51	886.81
ENSG00000134086	88.25	86.73	94.22	68.16	44.99	43.25	37.45	34.64	58.15	56.98	58.75	45.31	23.8	32.8	64.43	35.74	55.08	69.84	54.22	38.87	49.71	47.14	38.22	36.73	39.55	45.36	27.55	25.99	32.09	40.91	45.09	27.05	29.07	47.53	43.28	28.73	28.17	22.2	70.31	40.91	49.08	30.19	22.71	55.55	71.31	45.96	45.86	36.1	39.95
ENSG00000134107	33.9	54.67	43.99	48.05	27.11	50.31	141.93	67.99	69.66	66.89	78.33	60.74	149.08	140.09	85.46	122.99	73.15	64.78	195.2	132.32	215.08	116.81	147.01	150.11	185.41	234.39	200.53	114.03	200.12	197.28	262.32	207.01	160.75	326.72	98.22	158.75	164.81	231.09	125.17	86.54	83.18	216.32	409.16	246.44	77.08	109.89	56.71	148.4	68.16
ENSG00000134109	5.51	7.4	4.28	4.56	2.06	2.84	2.32	1.5	6.17	2.78	4.63	3.85	3.43	1.61	6.25	4.13	6.66	2	6.45	4.27	4.76	7.02	3.43	3.56	4.89	1.87	2.84	4.82	2.33	4.82	4.65	6.32	3	3.53	4.31	7.24	5.49	2.29	8.82	6.63	3.85	6.53	4.01	4.58	2.56	6.32	3.15	6.77	3.29
ENSG00000134121	97.53	87.69	10.81	32.27	88.93	22.62	27.25	33.63	60.59	20.81	33.77	48.83	36.05	25.24	18.92	50.8	34.39	42.19	39.88	53.83	45.97	105.7	106.01	29.8	57.67	30.51	18.99	29.03	23.8	51.06	38.16	42.42	16.76	22.68	56.32	43.5	36.42	11.46	57.29	50.94	30.66	40.61	26.76	76.15	21.51	40.93	20.41	53.6	12.51
ENSG00000134146	2.01	4.49	7.2	6.92	0.94	5.17	6.33	3.42	3.12	4.51	3.24	3	8.94	0.59	2.14	4.3	3.57	8.02	5.48	5.35	3.33	1.97	3.74	4.87	0.5	2.56	0.74	10.74	2.13	4.39	5.08	8.13	2.73	1.43	5.05	6.6	3.53	5	8.61	2.2	6.15	4.54	7.31	8.35	5.24	2.47	4.47	4.93	1.5
ENSG00000134152	58.26	26.65	15.29	30.4	4.12	11.03	30.28	17.45	24.13	5.94	15.4	14.08	18.07	4.64	11.26	12.74	8.15	8.96	28.91	20.53	15.24	17.29	23.03	26.39	4.35	9.73	3.9	14.58	4.98	7.72	12.9	16.66	16.79	3.14	13.79	13.17	14.98	6.6	29.26	16.4	16.2	15.94	21.95	11	16.88	20.95	27.47	17.87	6.59
[truncated: 11,244 more rows]
[truncated: 76 more columns]
