# Supplementary material
Source: publisher figshare collection journal article supplement (https://plos.figshare.com/articles/dataset/_/3973737)
Supplement: Supplementary file 1 [file 1 › S1 Table.PDF]

| Species | Diagnosis | Sample |      |     | Gender | RIN* | Cause of death^              | Source#   | Random |      | Used* |
|---------|-----------|--------|------|-----|--------|------|------------------------------|-----------|--------|------|-------|
|         |           | ID     | Year | Day |        |      |                              |           | Order  | Lane |       |
| Human   | Autism    | 6399   | 2    | 0   | M      | 7.3  | Drowning                     | HBTRC     | 136    | L7   | 1,3   |
| Human   | Autism    | 4671   | 4    | 165 | F      | 8.7  | Multiple injuries            | NICHD-BTB | 67     | L4   | 1,3   |
| Human   | Autism    | 7002   | 5    | 0   | F      | 8.4  | Drowning                     | HBTRC     | 48     | L3   | 1     |
| Human   | Autism    | 5569   | 5    | 0   | M      | 5.3  | Drowning                     | HBTRC     | 62     | L3   | 1,2   |
| Human   | Autism    | 1349   | 5    | 220 | M      | 7.4  | Drowning                     | NICHD-BTB | 120    | L6   | 1     |
| Human   | Autism    | 5144   | 7    | 55  | M      | 8.6  | Cancer                       | NICHD-BTB | 22     | L1   | 1     |
| Human   | Autism    | 1174   | 7    | 283 | F      | 5.4  | Seizure disorder             | NICHD-BTB | 82     | L4   |       |
| Human   | Autism    | 5666   | 8    | 0   | M      | 8.2  | Sarcoma                      | HBTRC     | 149    | L7   | 1,2   |
| Human   | Autism    | 4721   | 8    | 304 | M      | 5.2  | Drowning                     | NICHD-BTB | 139    | L7   | 1,2,3 |
| Human   | Autism    | 4925   | 9    | 0   | M      | 7.6  | Seizure disorder             | HBTRC     | 84     | L4   |       |
| Human   | Autism    | 7741   | 10   | 0   | M      | 8.3  | Epilepsy                     | HBTRC     | 2      | L1   | 1     |
| Human   | Autism    | 6831   | 10   | 0   | F      | 8.3  | Drowning                     | HBTRC     | 72     | L4   | 1     |
| Human   | Autism    | 5342   | 11   | 0   | F      | 6.5  | Drowning                     | HBTRC     | 60     | L3   | 1     |
| Human   | Autism    | 7078   | 11   | 0   | M      | 5.5  | Sudden unexpected death      | HBTRC     | 113    | L6   |       |
| Human   | Autism    | 4899   | 14   | 126 | M      | 8.2  | Drowning                     | NICHD-BTB | 7      | L1   | 1,3   |
| Human   | Autism    | 7575   | 15   | 0   | M      | 7    | Head trauma                  | HBTRC     | 100    | L5   |       |
| Human   | Autism    | 6184   | 18   | 0   | F      | 8    | Seizure disorder             | HBTRC     | 44     | L2   | 1,2   |
| Human   | Autism    | 7718   | 19   | 0   | M      | 6.7  | Stopped breathing            | HBTRC     | 96     | L5   | 1     |
| Human   | Autism    | 5144h  | 20   | 0   | M      | 8.1  | Accident, auto trauma        | HBTRC     | 109    | L6   | 1,2,3 |
| Human   | Autism    | 1638   | 20   | 277 | F      | 5.4  | Seizure disorder             | NICHD-BTB | 122    | L6   | 1     |
| Human   | Autism    | 6337   | 22   | 0   | M      | 5.6  | Aspiration                   | HBTRC     | 29     | L2   | 1,3   |
| Human   | Autism    | 7769   | 24   | 0   | M      | 8.2  | ARDS                         | HBTRC     | 71     | L4   | 1     |
| Human   | Autism    | 5000   | 27   | 0   | M      | 4.2  | Drowning                     | HBTRC     | 148    | L7   |       |
| Human   | Autism    | 6994   | 29   | 0   | M      | 7.8  | Seizure suspected            | HBTRC     | 57     | L3   | 1,2   |
| Human   | Autism    | 6640   | 29   | 0   | F      | 6.3  | Seizure disorder             | HBTRC     | 116    | L6   | 1,3   |
| Human   | Autism    | 5173   | 30   | 0   | M      | 5.9  | Gastrointestinal bleeding    | HBTRC     | 53     | L3   |       |
| Human   | Autism    | 7762   | 30   | 0   | M      | 7.4  | Epilepsy                     | HBTRC     | 74     | L4   |       |
| Human   | Autism    | 6677   | 30   | 0   | M      | 7.8  | Congestive heart failure     | HBTRC     | 134    | L7   | 1,2   |
| Human   | Autism    | 6401   | 39   | 0   | M      | 6.8  | Cardiac tamponade            | HBTRC     | 26     | L2   | 1,2   |
| Human   | Autism    | 7672   | 39   | 0   | M      | 2.6  | Aspiration pneumonitis       | HBTRC     | 144    | L7   | 1     |
| Human   | Autism    | 7085   | 49   | 0   | F      | 5.8  | Colorectal cancer            | HBTRC     | 73     | L4   |       |
| Human   | Autism    | 7886   | 50   | 0   | M      | 7.6  | Unknown                      | HBTRC     | 65     | L4   |       |
| Human   | Autism    | 7376   | 52   | 0   | F      | 6    | Unknown                      | HBTRC     | 79     | L4   | 1,2   |
| Human   | Autism    | 7090   | 60   | 0   | M      | 6.3  | Pancreatic cancer            | HBTRC     | 117    | L6   | 1,3   |
| Human   | Control   | 447    | 0    | 2   | M      | 8    | Complications of prematurity | NICHD-BTB | 93     | L5   | 1     |
| Human   | Control   | 779    | 0    | 5   | M      | 8.8  | Congenital heart defect      | NICHD-BTB | 54     | L3   | 1     |
| Human   | Control   | 398    | 0    | 16  | F      | 8.8  | Unknown                      | NICHD-BTB | 25     | L2   | 1     |
| Human   | Control   | 1157   | 0    | 20  | F      | 7.1  | Pneumonia associated         | NICHD-    | 107    | L6   | 1     |

| Species | Group   | Age   | Sex | Cause of death | Organ | Findings | Organ                                                       | Findings  | Organ | Findings |       |
|---------|---------|-------|-----|----------------|-------|----------|-------------------------------------------------------------|-----------|-------|----------|-------|
|         |         |       |     |                |       |          |                                                             |           |       |          |       |
| Human   | Control | 759   | 0   | 35             | M     | 7.9      | with meconium aspiration<br>Idiopathic pulmonary hemorrhage | NICHD-BTB | 132   | L7       | 1     |
| Human   | Control | 1055  | 0   | 96             | M     | 7.7      | Bronchopneumonia                                            | NICHD-BTB | 70    | L4       | 1     |
| Human   | Control | 5183  | 0   | 107            | M     | 7.7      | SIDS                                                        | NICHD-BTB | 129   | L7       | 1     |
| Human   | Control | 1303  | 0   | 212            | M     | 8        | Unknown                                                     | NICHD-BTB | 127   | L6       | 1     |
| Human   | Control | 1453  | 1   | 78             | M     | 6.7      | Asthma                                                      | NICHD-BTB | 51    | L3       | 1     |
| Human   | Control | 814   | 1   | 123            | M     | 7.6      | Drowning                                                    | NICHD-BTB | 68    | L4       | 1     |
| Human   | Control | 1275  | 2   | 57             | F     | 5.5      | Acute myocarditis                                           | NICHD-BTB | 27    | L2       | 1     |
| Human   | Control | 1791  | 2   | 286            | F     | 8.2      | Drowning                                                    | NICHD-BTB | 125   | L6       | 1,3   |
| Human   | Control | 6736  | 4   | 0              | F     | 6.8      | Acute bronchopneumonia                                      | HBTRC     | 92    | L5       | 1     |
| Human   | Control | 1185  | 4   | 258            | M     | 8.6      | Drowning                                                    | NICHD-BTB | 111   | L6       | 1,3   |
| Human   | Control | 4907  | 4   | 274            | F     | 8.1      | Asthma                                                      | NICHD-BTB | 9     | L1       | 1,2   |
| Human   | Control | 4898  | 7   | 272            | M     | 6.4      | Drowning                                                    | NICHD-BTB | 76    | L4       | 1     |
| Human   | Control | 1860  | 8   | 2              | M     | 8        | Cardiac arrhythmia                                          | NICHD-BTB | 36    | L2       | 1,2,3 |
| Human   | Control | 1706  | 8   | 214            | F     | 7.1      | Rejection of cardiac allograft transplantation              | NICHD-BTB | 137   | L7       | 1     |
| Human   | Control | 5161  | 10  | 262            | F     | 7.4      | Hanging                                                     | NICHD-BTB | 14    | L1       | 1     |
| Human   | Control | M3228 | 11  | 294            | M     | 8.3      | Internal bleeding                                           | NICHD-BTB | 110   | L6       | 1     |
| Human   | Control | 1908  | 13  | 360            | M     | 8.2      | Hanging                                                     | NICHD-BTB | 87    | L5       | 1,3   |
| Human   | Control | M3830 | 14  | 250            | M     | 6.1      | Hanging                                                     | NICHD-BTB | 80    | L4       |       |
| Human   | Control | 5242  | 15  | 119            | M     | 8.4      | Cardiac arrythmia                                           | NICHD-BTB | 143   | L7       | 1     |
| Human   | Control | 7387  | 17  | 0              | M     | 8.1      | Hanging                                                     | HBTRC     | 98    | L5       | 1,2   |
| Human   | Control | 5251  | 19  | 0              | M     | 6.6      | Respiratory infection                                       | HBTRC     | 49    | L3       | 1     |
| Human   | Control | 4548  | 20  | 63             | F     | 8.7      | Multiple injures                                            | NICHD-BTB | 141   | L7       | 1,2,3 |
| Human   | Control | 1846  | 20  | 221            | F     | 7.1      | Multiple injures                                            | NICHD-BTB | 42    | L2       | 1     |
| Human   | Control | 1442  | 22  | 322            | M     | 7.5      | Multiple injures                                            | NICHD-BTB | 99    | L5       | 1,3   |
| Human   | Control | 7738  | 24  | 0              | M     | 7.2      | Unknown                                                     | HBTRC     | 37    | L2       | 1     |
| Human   | Control | 602   | 27  | 42             | M     | 8.8      | Multiple injuries                                           | NICHD-BTB | 59    | L3       | 1     |
| Human   | Control | B-24  | 28  | 0              | F     | 6.5      | Unknown                                                     | MPRC      | 130   | L7       | 1,2,3 |
| Human   | Control | 1502  | 29  | 363            | M     | 7.4      | Multiple injuries                                           | NICHD-BTB | 77    | L4       | 1,2   |

|            |         |        |    |     |   |     |                             |           |     |    |     |
|------------|---------|--------|----|-----|---|-----|-----------------------------|-----------|-----|----|-----|
| Human      | Control | 7344   | 36 | 0   | F | 6.6 | Multisystem failure         | HBTRC     | 45  | L3 | 1   |
| Human      | Control | 7369   | 36 | 0   | M | 5.7 | Possible pulmonary embolism | HBTRC     | 50  | L3 |     |
| Human      | Control | 7561   | 39 | 0   | M | 7   | Heart attack                | HBTRC     | 64  | L3 | 1,2 |
| Human      | Control | 1134   | 41 | 241 | M | 8.9 | ASCVD                       | NICHD-BTB | 97  | L5 | 1   |
| Human      | Control | 6259   | 50 | 0   | M | 8   | Unknown                     | HBTRC     | 133 | L7 | 1,2 |
| Human      | Control | 1578   | 53 | 112 | M | 8.3 | ASCVD                       | NICHD-BTB | 21  | L1 | 1   |
| Human      | Control | 6860   | 56 | 0   | M | 8   | Unknown                     | HBTRC     | 81  | L4 | 1   |
| Human      | Control | 4263   | 61 | 187 | M | 8.8 | Cardiac arrest              | NICHD-BTB | 23  | L2 | 1,3 |
| Chimpanzee | Control | 11454  | 0  | 0   | M | 6.9 | -                           | BZ        | 138 | L7 | 1   |
| Chimpanzee | Control | 13302  | 0  | 1   | F | 7.5 | -                           | BZ        | 118 | L6 | 1   |
| Chimpanzee | Control | 13308  | 0  | 7   | M | 2.3 | -                           | BZ        | 17  | L1 |     |
| Chimpanzee | Control | 58     | 0  | 7   | F | 8.2 | -                           | SNPRC     | 20  | L1 | 1   |
| Chimpanzee | Control | 13311  | 0  | 8   | M | 7.9 | -                           | BZ        | 63  | L3 | 1   |
| Chimpanzee | Control | 60     | 0  | 32  | F | 7.3 | -                           | SNPRC     | 18  | L1 | 1   |
| Chimpanzee | Control | 59     | 0  | 34  | M | 5.8 | -                           | SNPRC     | 112 | L6 | 1   |
| Chimpanzee | Control | 13309  | 0  | 39  | M | 5.6 | -                           | BZ        | 35  | L2 |     |
| Chimpanzee | Control | 13304  | 0  | 45  | F | 6.6 | -                           | BZ        | 24  | L2 | 1   |
| Chimpanzee | Control | 11452  | 1  | 160 | F | 7.9 | -                           | BZ        | 106 | L5 | 1   |
| Chimpanzee | Control | 13312  | 6  | 123 | F | 5.7 | -                           | BZ        | 104 | L5 |     |
| Chimpanzee | Control | 57     | 10 | 146 | M | 6.6 | -                           | SNPRC     | 147 | L7 | 1   |
| Chimpanzee | Control | Japie  | 12 | 35  | M | 6.9 | -                           | BPRC      | 39  | L2 |     |
| Chimpanzee | Control | 37     | 16 | 219 | F | 5.9 | -                           | SNPRC     | 124 | L6 |     |
| Chimpanzee | Control | 38     | 16 | 292 | F | 3.4 | -                           | SNPRC     | 30  | L2 |     |
| Chimpanzee | Control | 1480   | 17 | 292 | F | 6.7 | -                           | GW        | 16  | L1 | 1   |
| Chimpanzee | Control | 40     | 18 | 0   | F | 7.8 | -                           | SNPRC     | 40  | L2 | 1   |
| Chimpanzee | Control | CAO127 | 18 | 183 | F | 7.3 | -                           | GW        | 11  | L1 | 1   |
| Chimpanzee | Control | 31     | 20 | 73  | F | 8   | -                           | SNPRC     | 56  | L3 | 1   |
| Chimpanzee | Control | 32     | 20 | 183 | F | 5.8 | -                           | SNPRC     | 85  | L4 | 1   |
| Chimpanzee | Control | 30     | 21 | 110 | M | 5.6 | -                           | SNPRC     | 126 | L6 | 1   |
| Chimpanzee | Control | 1465   | 21 | 146 | F | 6.1 | -                           | GW        | 8   | L1 | 1   |
| Chimpanzee | Control | 1437   | 21 | 183 | F | 7.1 | -                           | GW        | 46  | L3 | 1   |
| Chimpanzee | Control | 1275   | 22 | 256 | M | 7.7 | -                           | GW        | 66  | L4 | 1   |
| Chimpanzee | Control | 1365   | 23 | 329 | M | 8.2 | -                           | GW        | 38  | L2 |     |
| Chimpanzee | Control | 1358   | 24 | 37  | M | 7.7 | -                           | GW        | 90  | L5 | 1   |
| Chimpanzee | Control | 1028   | 25 | 183 | M | 2.4 | -                           | GW        | 119 | L6 |     |
| Chimpanzee | Control | 1351   | 26 | 146 | M | 8.2 | -                           | GW        | 34  | L2 | 1   |
| Chimpanzee | Control | 1266   | 27 | 37  | M | 8.1 | -                           | GW        | 75  | L4 | 1   |
| Chimpanzee | Control | 1342   | 28 | 329 | M | 5.7 | -                           | GW        | 94  | L5 | 1   |
| Chimpanzee | Control | 1167   | 29 | 0   | M | 7.9 | -                           | GW        | 108 | L6 | 1   |
| Chimpanzee | Control | 936    | 30 | 292 | F | 5.7 | -                           | GW        | 103 | L5 | 1   |
| Chimpanzee | Control | 1060   | 31 | 73  | M | 7.5 | -                           | GW        | 102 | L5 | 1   |
| Chimpanzee | Control | 53     | 32 | 146 | M | 5.8 | -                           | SNPRC     | 91  | L5 | 1   |
| Chimpanzee | Control | 905    | 34 | 183 | M | 7.6 | -                           | GW        | 43  | L2 | 1   |
| Chimpanzee | Control | Zurich | 35 | 9   | M | 5.8 | -                           | BZ        | 105 | L5 | 1   |
| Chimpanzee | Control | 5      | 39 | 329 | F | 8   | -                           | SNPRC     | 89  | L5 | 1   |
| Chimpanzee | Control | 1045   | 42 | 219 | M | 7.7 | -                           | GW        | 146 | L7 | 1   |

|            |         |        |     |     |   |     |   |        |     |    |   |
|------------|---------|--------|-----|-----|---|-----|---|--------|-----|----|---|
| Chimpanzee | Control | 1560   | 109 | 329 | M | 6.7 | - | GW     | 12  | L1 | 1 |
| Macaque    | Control | NB0903 | 0   | 0.5 | M | 8.6 | - | Suzhou | 145 | L7 | 1 |
| Macaque    | Control | NB0901 | 0   | 1   | M | 8.5 | - | Suzhou | 10  | L1 | 1 |
| Macaque    | Control | NB0905 | 0   | 7   | M | 9.3 | - | Suzhou | 5   | L1 | 1 |
| Macaque    | Control | 705    | 0   | 16  | M | 9.1 | - | Suzhou | 61  | L3 | 1 |
| Macaque    | Control | 704    | 0   | 20  | M | 8.4 | - | Suzhou | 19  | L1 | 1 |
| Macaque    | Control | 702    | 0   | 23  | M | 9.5 | - | Suzhou | 114 | L6 | 1 |
| Macaque    | Control | 701    | 0   | 24  | M | 9   | - | Suzhou | 55  | L3 |   |
| Macaque    | Control | 70175  | 0   | 151 | M | 9.6 | - | Suzhou | 131 | L7 | 1 |
| Macaque    | Control | 70115  | 0   | 179 | M | 8.5 | - | Suzhou | 128 | L6 | 1 |
| Macaque    | Control | 70133  | 0   | 207 | M | 8.3 | - | Suzhou | 47  | L3 | 1 |
| Macaque    | Control | 6709   | 0   | 278 | M | 8.7 | - | Suzhou | 83  | L4 | 1 |
| Macaque    | Control | 6237   | 0   | 353 | M | 9   | - | Suzhou | 123 | L6 | 1 |
| Macaque    | Control | 61569  | 1   | 80  | M | 8.3 | - | Suzhou | 142 | L7 | 1 |
| Macaque    | Control | 51087  | 1   | 170 | M | 9.3 | - | Suzhou | 140 | L7 |   |
| Macaque    | Control | 51373  | 1   | 242 | M | 9.1 | - | Suzhou | 52  | L3 | 1 |
| Macaque    | Control | 51469  | 1   | 294 | M | 8.1 | - | Suzhou | 78  | L4 | 1 |
| Macaque    | Control | 51095  | 2   | 9   | M | 9   | - | Suzhou | 4   | L1 |   |
| Macaque    | Control | 5773   | 2   | 101 | M | 8.4 | - | Suzhou | 69  | L4 | 1 |
| Macaque    | Control | 4093   | 3   | 40  | M | 9.3 | - | Suzhou | 135 | L7 | 1 |
| Macaque    | Control | 50715  | 3   | 80  | M | 8.7 | - | Suzhou | 6   | L1 | 1 |
| Macaque    | Control | 4089   | 3   | 110 | M | 8.9 | - | Suzhou | 121 | L6 | 1 |
| Macaque    | Control | 3071   | 4   | 27  | M | 7.8 | - | Suzhou | 101 | L5 | 1 |
| Macaque    | Control | B00051 | 6   | 165 | M | 8.2 | - | Suzhou | 58  | L3 | 1 |
| Macaque    | Control | 135    | 7   | 15  | M | 8.7 | - | Suzhou | 115 | L6 | 1 |
| Macaque    | Control | 99057  | 8   | 16  | M | 9.3 | - | Suzhou | 33  | L2 |   |
| Macaque    | Control | 98145  | 9   | 37  | M | 7.8 | - | Suzhou | 1   | L1 |   |
| Macaque    | Control | 98073  | 9   | 104 | M | 8.5 | - | Suzhou | 15  | L1 | 1 |
| Macaque    | Control | 96007  | 10  | 328 | M | 8.4 | - | Suzhou | 28  | L2 | 1 |
| Macaque    | Control | 95001  | 11  | 346 | M | 8.4 | - | Suzhou | 95  | L5 | 1 |
| Macaque    | Control | 94051  | 13  | 17  | M | 8.7 | - | Suzhou | 32  | L2 | 1 |
| Macaque    | Control | 93041  | 14  | 21  | M | 8.9 | - | Suzhou | 41  | L2 | 1 |
| Macaque    | Control | 92095  | 14  | 349 | M | 8.2 | - | Suzhou | 88  | L5 | 1 |
| Macaque    | Control | 92107  | 15  | 3   | M | 7.8 | - | Suzhou | 86  | L5 | 1 |
| Macaque    | Control | 90049  | 17  | 22  | M | 9   | - | Suzhou | 3   | L1 | 1 |
| Macaque    | Control | 87015  | 20  | 91  | M | 7.9 | - | Suzhou | 31  | L2 | 1 |
| Macaque    | Control | 86023  | 21  | 8   | M | 5.9 | - | Suzhou | 13  | L1 | 1 |

\* RIN: RNA Integrity Number;

^ ARDS: Acute respiratory distress syndrome;

ASCVD: Arteriosclerotic cardiovascular disease;

SIDS: Sudden infant death syndrome.

# NICHD-BTB: NICHD Brain and Tissue Bank for Developmental Disorders at the University of Maryland;

HBTRC: Harvard Brain Tissue Resource Center;

MPRC: Maryland Brain Collection Center;

BPRC: Biomedical Primate Research Centre;

BZ: Burgers' Zoo in Arnhem;

SNPRC: Southwest National Primate Research Center, San Antonio, TX;

GW: Department of Anthropology, The George Washington University, Washington, DC;

Suzhou: Suzhou Drug Safety Evaluation and Research Center, Suzhou, China.

& 1: samples with good quality used in the main analysis;

2: age-matched samples used to estimate the expression change in autism between RNA-seq and array;

3: age-matched samples used to estimate the expression change in autism between RNA-seq and ChIP-seq.
