# Supplementary material
Source: publisher figshare collection journal article supplement (https://plos.figshare.com/articles/dataset/_/3973737)
Supplement: Supplementary file 1 [file 1 › S2 Data.XLSX]

## Sheet: Data for Fig. 1A
Sample ID	MDS1*	MDS2
447	-0.208076	-0.325499
779	-0.233656	-0.239318
398	0.149916	-0.327728
1157	0.0438034	-0.169208
759	-0.278023	-0.253303
1055	0.00605004	-0.104753
5183	0.0275947	-0.0949804
1303	-0.052327	-0.0416847
1453	-0.143895	-0.0191805
814	-0.0790954	-0.0335628
1275	-0.0443368	0.0179714
1791	-0.111466	0.0264272
6736	0.0861161	0.00801427
1185	-0.0315117	0.00381186
4907	0.0159368	-0.00498143
4898	-0.0830768	0.028952
1860	-0.0654044	0.0119173
1706	0.0389548	0.0123371
5161	-0.0567924	0.0164692
M3228	0.0131668	0.0541238
1908	-0.0904747	0.0476256
5242	-0.17713	0.0896144
7387	-0.184918	0.0997245
5251	0.12654	0.0330272
4548	-0.100377	0.0632715
1846	-0.052584	0.0459673
1442	-0.0477734	0.0566039
7738	0.0183228	0.0396518
602	0.0291884	-0.00666553
B-24	-0.0654686	0.0730051
1502	-0.0213681	0.0283883
7344	-0.0374675	0.0447953
7561	-0.0381174	0.0977873
1134	0.0141255	0.0278071
6259	-0.058784	0.0622238
1578	-0.0512067	0.0643952
6860	0.0176141	0.0635754
4263	0.163465	0.0234589
6399	0.0786559	0.00505899
4671	-0.109882	0.0140392
5569	0.0884429	-0.00272517
7002	-0.140015	0.0947116
1349	-0.0099767	-0.0165729
5144	-0.0672513	0.0624684
5666	-0.00226644	0.0237967
4721	0.02988	0.0204127
7741	0.096109	-0.00331813
6831	-0.102108	0.0664798
5342	0.112854	-0.00722192
4899	-0.010471	0.0171798
6184	-0.151138	0.0867606
7718	0.091134	-0.00877438
5144h	-0.0446765	0.054178
1638	0.138427	-0.0125451
6337	0.332024	-0.0187295
7769	0.148916	-0.00291212
6994	-0.0568911	0.04023
6640	0.363134	-0.0613538
6677	0.0495532	0.0564025
6401	0.103203	0.0344291
7672	0.352785	-0.0256515
7376	0.00406292	0.063364
7090	0.268029	0.000211156
*MDS: Multidimensional scaling
