# Supplementary material
Source: publisher figshare collection journal article supplement (https://plos.figshare.com/articles/dataset/_/3973737)
Supplement: Supplementary file 1 [file 1 › S2 Table.PDF]

| Species | Diagnosis | Sample ID | Total reads | Mapped reads |          | Unique mapped |          |
|---------|-----------|-----------|-------------|--------------|----------|---------------|----------|
|         |           |           |             | genome       | junction | genome        | junction |
| Human   | Autism    | 6399      | 10341810    | 7740346      | 1691148  | 7224893       | 1536161  |
| Human   | Autism    | 4671      | 11251222    | 8442004      | 1798371  | 7670246       | 1634228  |
| Human   | Autism    | 5569      | 9365139     | 7479459      | 1153000  | 6912609       | 1031658  |
| Human   | Autism    | 7002      | 10129699    | 7469097      | 1727917  | 7056950       | 1581828  |
| Human   | Autism    | 1349      | 11576594    | 9050799      | 1638023  | 8150124       | 1452079  |
| Human   | Autism    | 5144      | 5650860     | 4924661      | 230423   | 1580469       | 210376   |
| Human   | Autism    | 1174      | 9821150     | 8221332      | 664805   | 7114705       | 533988   |
| Human   | Autism    | 5666      | 10567561    | 7998771      | 1716611  | 7549617       | 1547295  |
| Human   | Autism    | 4721      | 9404085     | 7429888      | 1225921  | 6369888       | 1096009  |
| Human   | Autism    | 4925      | 9581455     | 7555085      | 1227527  | 7006753       | 1084434  |
| Human   | Autism    | 6831      | 9505124     | 7079304      | 1565018  | 6425471       | 1434347  |
| Human   | Autism    | 7741      | 10093305    | 7842256      | 1506187  | 7349180       | 1325104  |
| Human   | Autism    | 5342      | 8131743     | 6803651      | 718898   | 6145559       | 620328   |
| Human   | Autism    | 7078      | 8532516     | 6794499      | 1124431  | 6304172       | 939922   |
| Human   | Autism    | 4899      | 9039432     | 6953140      | 1402557  | 6255257       | 1248693  |
| Human   | Autism    | 7575      | 7155438     | 5106535      | 1504441  | 4599477       | 1190560  |
| Human   | Autism    | 6184      | 8502885     | 6405799      | 1415526  | 5976095       | 1291123  |
| Human   | Autism    | 7718      | 8858576     | 6757707      | 1349585  | 6352885       | 1201700  |
| Human   | Autism    | 5144h     | 11519086    | 8721028      | 1765189  | 7594697       | 1604139  |
| Human   | Autism    | 1638      | 10726057    | 8546126      | 1360062  | 7581203       | 1230738  |
| Human   | Autism    | 6337      | 7847515     | 6717720      | 509170   | 5690843       | 445834   |
| Human   | Autism    | 7769      | 9211131     | 7115073      | 1409689  | 6656306       | 1230538  |
| Human   | Autism    | 5000      | 10929117    | 8397675      | 1669412  | 7642242       | 1421034  |
| Human   | Autism    | 6640      | 9567591     | 7359513      | 1555961  | 6456256       | 1343032  |
| Human   | Autism    | 6994      | 8898070     | 6913235      | 1358148  | 6411937       | 1220633  |
| Human   | Autism    | 5173      | 10198139    | 8552188      | 908293   | 7816192       | 794168   |
| Human   | Autism    | 6677      | 10179488    | 7947918      | 1388003  | 7374699       | 1246594  |
| Human   | Autism    | 7762      | 8076204     | 6515579      | 917675   | 6019828       | 802137   |
| Human   | Autism    | 6401      | 9448086     | 7054494      | 1608074  | 6559532       | 1417017  |
| Human   | Autism    | 7672      | 7923118     | 7033762      | 322770   | 6281152       | 263674   |
| Human   | Autism    | 7085      | 10662256    | 8700074      | 1116787  | 7926517       | 953812   |
| Human   | Autism    | 7886      | 8171231     | 6421488      | 1053504  | 5745544       | 895261   |
| Human   | Autism    | 7376      | 10811206    | 8306460      | 1681903  | 7732890       | 1506186  |
| Human   | Autism    | 7090      | 8770747     | 7027406      | 1037721  | 6286034       | 905311   |
| Human   | Control   | 447       | 10904288    | 4489372      | 962356   | 4009137       | 812180   |
| Human   | Control   | 779       | 10466812    | 7878598      | 1713179  | 7204652       | 1510454  |
| Human   | Control   | 398       | 7919215     | 5689593      | 1753556  | 5128979       | 1430046  |
| Human   | Control   | 1157      | 9303221     | 7251098      | 1424648  | 6558155       | 1169327  |
| Human   | Control   | 759       | 9657862     | 6725619      | 2070676  | 6144772       | 1910054  |
| Human   | Control   | 1055      | 11282445    | 8968968      | 1319992  | 8195650       | 1144021  |
| Human   | Control   | 5183      | 11044497    | 8844191      | 1349604  | 8181322       | 1202368  |
| Human   | Control   | 1303      | 11070436    | 8714358      | 1404567  | 7766008       | 1257876  |
| Human   | Control   | 1453      | 10544783    | 7870411      | 1556445  | 7358725       | 1414755  |
| Human   | Control   | 814       | 10476563    | 7774084      | 1804458  | 6757047       | 1624708  |
| Human   | Control   | 1275      | 9734021     | 7519592      | 1454762  | 7055552       | 1319010  |
| Human   | Control   | 1791      | 12127944    | 9234272      | 1957074  | 8378456       | 1775492  |

|            |         |        |          |         |         |         |         |
|------------|---------|--------|----------|---------|---------|---------|---------|
| Human      | Control | 6736   | 8326903  | 6602524 | 1110138 | 6150559 | 990938  |
| Human      | Control | 1185   | 9786434  | 7227661 | 1766503 | 6012267 | 1598969 |
| Human      | Control | 4907   | 9578007  | 7381572 | 1431162 | 6633364 | 1280551 |
| Human      | Control | 4898   | 11760445 | 8870468 | 1849291 | 8247486 | 1671575 |
| Human      | Control | 1860   | 8670080  | 6644239 | 1408204 | 5670310 | 1274383 |
| Human      | Control | 1706   | 11905741 | 9524505 | 1372170 | 8028633 | 1237169 |
| Human      | Control | 5161   | 8367710  | 6482585 | 1270175 | 6032934 | 1142569 |
| Human      | Control | M3228  | 11329437 | 8336202 | 1971448 | 7894501 | 1813212 |
| Human      | Control | 1908   | 9433644  | 7213477 | 1499775 | 6630406 | 1359520 |
| Human      | Control | M3830  | 10528550 | 8116461 | 1532680 | 7616449 | 1392696 |
| Human      | Control | 5242   | 11234835 | 8258652 | 1984180 | 7786160 | 1862765 |
| Human      | Control | 7387   | 9126544  | 6760065 | 1583226 | 6370675 | 1457380 |
| Human      | Control | 5251   | 9723637  | 7802368 | 1214133 | 7211860 | 1084998 |
| Human      | Control | 4548   | 11156736 | 8077140 | 2075023 | 7246965 | 1897383 |
| Human      | Control | 1846   | 7406407  | 5593446 | 1196004 | 5158518 | 1055831 |
| Human      | Control | 1442   | 9292950  | 6943472 | 1426547 | 5630543 | 1302083 |
| Human      | Control | 7738   | 7769759  | 6216512 | 1032869 | 5769998 | 910867  |
| Human      | Control | 602    | 9035360  | 6814642 | 1533618 | 5900515 | 1361529 |
| Human      | Control | B-24   | 11081762 | 8376822 | 1880885 | 7768838 | 1692326 |
| Human      | Control | 1502   | 10013837 | 7466882 | 1804950 | 6812034 | 1624793 |
| Human      | Control | 7344   | 9659056  | 7418503 | 1499796 | 6885165 | 1331794 |
| Human      | Control | 7369   | 10213241 | 8488212 | 460217  | 7630620 | 401695  |
| Human      | Control | 7561   | 10017170 | 7704910 | 1510348 | 7234303 | 1350277 |
| Human      | Control | 1134   | 8998020  | 6659671 | 1488452 | 5214083 | 1358892 |
| Human      | Control | 6259   | 11166137 | 8516050 | 1800989 | 8009260 | 1630728 |
| Human      | Control | 1578   | 10028528 | 7422955 | 1720335 | 6766947 | 1539136 |
| Human      | Control | 6860   | 10726199 | 7963374 | 1680476 | 7484192 | 1524838 |
| Human      | Control | 4263   | 8467944  | 6585842 | 1241794 | 5726512 | 1079641 |
| Chimpanzee | Control | 11454  | 8827503  | 6596771 | 1203050 | 6128632 | 1022657 |
| Chimpanzee | Control | 13302  | 10521488 | 7681022 | 1333456 | 7069382 | 1151304 |
| Chimpanzee | Control | 58     | 9989855  | 7165479 | 1516320 | 6768922 | 1336570 |
| Chimpanzee | Control | 13308  | 8976485  | 6938033 | 716199  | 6346687 | 578483  |
| Chimpanzee | Control | 13311  | 10713100 | 7724901 | 1375759 | 7180469 | 1222709 |
| Chimpanzee | Control | 60     | 6987426  | 4974941 | 949371  | 4656329 | 800106  |
| Chimpanzee | Control | 59     | 11340002 | 8274524 | 1455468 | 7679805 | 1238474 |
| Chimpanzee | Control | 13309  | 8351209  | 6250212 | 752427  | 5772295 | 621901  |
| Chimpanzee | Control | 13304  | 8029644  | 5897778 | 926518  | 5524941 | 806275  |
| Chimpanzee | Control | 11452  | 9281689  | 6738744 | 1181803 | 6298632 | 1075244 |
| Chimpanzee | Control | 13312  | 8597128  | 6256326 | 586011  | 5517749 | 506698  |
| Chimpanzee | Control | 57     | 11226560 | 7979186 | 1527518 | 7424635 | 1379665 |
| Chimpanzee | Control | 1560   | 8717372  | 6365697 | 1288698 | 5923136 | 1149432 |
| Chimpanzee | Control | Japie  | 9231851  | 7017852 | 1140523 | 6623278 | 999590  |
| Chimpanzee | Control | 37     | 8792020  | 6323232 | 1044433 | 5889417 | 855595  |
| Chimpanzee | Control | 38     | 8185238  | 5975570 | 867752  | 5494188 | 739112  |
| Chimpanzee | Control | 1480   | 13079392 | 9401497 | 1624595 | 8837360 | 1475072 |
| Chimpanzee | Control | 40     | 8501118  | 6112583 | 1106923 | 5716417 | 984470  |
| Chimpanzee | Control | CAO127 | 9747361  | 7149339 | 1401638 | 6688306 | 1251974 |
| Chimpanzee | Control | 31     | 9897509  | 7058897 | 1461751 | 6656261 | 1323243 |
| Chimpanzee | Control | 32     | 10754703 | 7800575 | 1483971 | 7326169 | 1350811 |

|            |         |        |          |          |         |         |         |
|------------|---------|--------|----------|----------|---------|---------|---------|
| Chimpanzee | Control | 30     | 10727964 | 7914321  | 1525708 | 7410966 | 1316314 |
| Chimpanzee | Control | 1465   | 10385964 | 7381675  | 1405031 | 6937196 | 1249635 |
| Chimpanzee | Control | 1437   | 10144166 | 7639440  | 1358308 | 7225426 | 1212525 |
| Chimpanzee | Control | 1275   | 11599628 | 8392849  | 1731709 | 7971912 | 1577050 |
| Chimpanzee | Control | 1365   | 8931801  | 6561757  | 1248897 | 6248975 | 1137883 |
| Chimpanzee | Control | 1358   | 8961884  | 6489079  | 1355879 | 6054623 | 1199204 |
| Chimpanzee | Control | 1028   | 8509062  | 6422346  | 805448  | 5855359 | 640075  |
| Chimpanzee | Control | 1351   | 8686063  | 6092013  | 1308341 | 5726189 | 1193715 |
| Chimpanzee | Control | 1266   | 12190487 | 8645727  | 1806353 | 8149299 | 1644607 |
| Chimpanzee | Control | 1342   | 8814780  | 6597796  | 1109744 | 6142663 | 1004399 |
| Chimpanzee | Control | 1167   | 11260122 | 8110292  | 1765337 | 7691259 | 1607212 |
| Chimpanzee | Control | 936    | 7975301  | 5958703  | 1019419 | 5562706 | 914032  |
| Chimpanzee | Control | 1060   | 8035483  | 5598345  | 1182438 | 5134670 | 1028498 |
| Chimpanzee | Control | 53     | 11244844 | 8209323  | 1623368 | 7707904 | 1470897 |
| Chimpanzee | Control | 905    | 8426240  | 6020879  | 1047985 | 5488925 | 926909  |
| Chimpanzee | Control | Zurich | 9344238  | 6658947  | 1085971 | 6123666 | 973671  |
| Chimpanzee | Control | 5      | 9675462  | 6972505  | 1448451 | 6570756 | 1325423 |
| Chimpanzee | Control | 1045   | 9709081  | 6961605  | 1252612 | 6525393 | 1114358 |
| Macaque    | Control | NB0903 | 11502454 | 7443519  | 1791433 | 7072398 | 1627879 |
| Macaque    | Control | NB0901 | 12245658 | 7957389  | 1828244 | 7589562 | 1656837 |
| Macaque    | Control | NB0905 | 11759873 | 7552310  | 1818038 | 7203181 | 1660040 |
| Macaque    | Control | 0705   | 10161033 | 6601120  | 1494305 | 6272905 | 1361025 |
| Macaque    | Control | 704    | 11744435 | 7597369  | 1667284 | 7206602 | 1510995 |
| Macaque    | Control | 0702   | 12066253 | 7771658  | 1891508 | 7404647 | 1725309 |
| Macaque    | Control | 0701   | 10161313 | 6145894  | 1687432 | 5797959 | 1531189 |
| Macaque    | Control | 070175 | 10828433 | 6934072  | 1634044 | 6587060 | 1488922 |
| Macaque    | Control | 70115  | 8370651  | 5281263  | 1187885 | 5029208 | 1082139 |
| Macaque    | Control | 70133  | 9509000  | 6088097  | 1379218 | 5779705 | 1253349 |
| Macaque    | Control | 6709   | 12644449 | 8182577  | 2006667 | 7816430 | 1831113 |
| Macaque    | Control | 06237  | 13122198 | 8516379  | 1884174 | 8083893 | 1708261 |
| Macaque    | Control | 61569  | 10515498 | 6872019  | 1587885 | 6543079 | 1436963 |
| Macaque    | Control | 051087 | 10612063 | 6579844  | 1773421 | 6196291 | 1591120 |
| Macaque    | Control | 051373 | 11516693 | 7303719  | 1736128 | 6946186 | 1585947 |
| Macaque    | Control | 051469 | 12620439 | 8144785  | 1812148 | 7729112 | 1632282 |
| Macaque    | Control | 051095 | 10806008 | 6382176  | 1851286 | 5934626 | 1658036 |
| Macaque    | Control | 05773  | 10881989 | 6972735  | 1623767 | 6557560 | 1448623 |
| Macaque    | Control | 4093   | 12402852 | 7889153  | 1897576 | 7488790 | 1741383 |
| Macaque    | Control | 050715 | 9546532  | 6165231  | 1512163 | 5881092 | 1372731 |
| Macaque    | Control | 04089  | 13305974 | 8399817  | 2083689 | 8007029 | 1907169 |
| Macaque    | Control | 3071   | 9474277  | 5919447  | 1437051 | 5618115 | 1313355 |
| Macaque    | Control | B00051 | 10268844 | 6438830  | 1427277 | 6058721 | 1299720 |
| Macaque    | Control | 00135  | 12394922 | 7834746  | 1906518 | 7425358 | 1721112 |
| Macaque    | Control | 99057  | 9004028  | 5351051  | 1544764 | 5015488 | 1395599 |
| Macaque    | Control | 98145  | 11156709 | 6795232  | 1798172 | 6354846 | 1591960 |
| Macaque    | Control | 98073  | 18078522 | 10345918 | 2271077 | 9666772 | 2041925 |
| Macaque    | Control | 96007  | 10598207 | 6752562  | 1659475 | 6431279 | 1510588 |
| Macaque    | Control | 95001  | 10326175 | 6321662  | 1549415 | 6002785 | 1409098 |
| Macaque    | Control | 94051  | 9309516  | 5887079  | 1389752 | 5581685 | 1264320 |
| Macaque    | Control | 93041  | 9886005  | 6224126  | 1460464 | 5879772 | 1333081 |

|         |         |       |          |         |         |         |         |
|---------|---------|-------|----------|---------|---------|---------|---------|
| Macaque | Control | 92095 | 9514593  | 6079328 | 1392926 | 5756198 | 1259834 |
| Macaque | Control | 92107 | 10228429 | 6514166 | 1446672 | 6151052 | 1303298 |
| Macaque | Control | 90049 | 13407744 | 8637289 | 2110619 | 8218700 | 1905997 |
| Macaque | Control | 87015 | 9325483  | 6046863 | 1364216 | 5683741 | 1204434 |
| Macaque | Control | 86023 | 11968615 | 7823376 | 1763733 | 7402794 | 1579585 |

---
