# Supplementary material
Source: publisher figshare collection journal article supplement (https://plos.figshare.com/articles/dataset/_/3973737)
Supplement: Supplementary file 1 [file 1 › S3 Data.TXT]

Cluster_ID	Ensembl_ID	HGNC_ID
C1	ENSG00000162585	C1orf86
C1	ENSG00000097033	SH3GLB1
C1	ENSG00000113845	TIMMDC1
C1	ENSG00000163884	KLF15
C1	ENSG00000115204	MPV17
C1	ENSG00000186132	C2orf76
C1	ENSG00000167525	PROCA1
C1	ENSG00000072134	EPN2
C1	ENSG00000174021	GNG5
C1	ENSG00000146535	GNA12
C1	ENSG00000116198	CEP104
C1	ENSG00000100292	HMOX1
C1	ENSG00000144909	OSBPL11
C1	ENSG00000105372	RPS19
C1	ENSG00000149716	ORAOV1
C1	ENSG00000115825	PRKD3
C1	ENSG00000175183	CSRP2
C1	ENSG00000110711	AIP
C1	ENSG00000143256	PFDN2
C1	ENSG00000167797	CDK2AP2
C1	ENSG00000143222	UFC1
C1	ENSG00000139531	SUOX
C1	ENSG00000111058	ACSS3
C1	ENSG00000103187	COTL1
C1	ENSG00000016391	CHDH
C1	ENSG00000167996	FTH1
C1	ENSG00000087495	PHACTR3
C1	ENSG00000171953	ATPAF2
C1	ENSG00000170584	NUDCD2
C1	ENSG00000131899	LLGL1
C1	ENSG00000254772	EEF1G
C1	ENSG00000101190	TCFL5
C1	ENSG00000160908	ZNF394
C1	ENSG00000140022	STON2
C1	ENSG00000125534	PPDPF
C1	ENSG00000125520	SLC2A4RG
C1	ENSG00000101849	TBL1X
C1	ENSG00000168028	RPSA
C1	ENSG00000188846	RPL14
C1	ENSG00000121310	ECHDC2
C1	ENSG00000129250	KIF1C
C1	ENSG00000087250	MT3
C1	ENSG00000116171	SCP2
C1	ENSG00000129422	MTUS1
C1	ENSG00000157184	CPT2
C1	ENSG00000185043	CIB1
C1	ENSG00000142937	RPS8
C1	ENSG00000101605	MYOM1
C1	ENSG00000103111	MON1B
C1	ENSG00000123595	RAB9A
C1	ENSG00000087842	PIR
C1	ENSG00000117450	PRDX1
C1	ENSG00000114391	RPL24
C1	ENSG00000187514	PTMA
C1	ENSG00000112306	RPS12
C1	ENSG00000168268	NT5DC2
C1	ENSG00000176973	FAM89B
C1	ENSG00000183688	FAM101B
C1	ENSG00000165478	HEPACAM
C1	ENSG00000221932	HEPN1
C1	ENSG00000150433	TMEM218
C1	ENSG00000187837	HIST1H1C
C1	ENSG00000100842	EFS
C1	ENSG00000085982	USP40
C1	ENSG00000163629	PTPN13
C1	ENSG00000215217	C5orf49
C1	ENSG00000180573	HIST1H2AC
C1	ENSG00000123080	CDKN2C
C1	ENSG00000197798	FAM118B
C1	ENSG00000127774	TMEM93
C1	ENSG00000136932	C9orf156
C1	ENSG00000124508	BTN2A2
C1	ENSG00000136938	ANP32B
C1	ENSG00000081870	HSPB11
C1	ENSG00000259431	THTPA
C1	ENSG00000114853	ZBTB47
C1	ENSG00000072778	ACADVL
C1	ENSG00000134508	CABLES1
C1	ENSG00000164111	ANXA5
C1	ENSG00000103148	NPRL3
C1	ENSG00000148498	PARD3
C1	ENSG00000170889	RPS9
C1	ENSG00000161958	FGF11
C1	ENSG00000145050	MANF
C1	ENSG00000129562	DAD1
C1	ENSG00000171206	TRIM8
C1	ENSG00000169006	NTSR2
C1	ENSG00000129194	SOX15
C1	ENSG00000225921	NOL7
C1	ENSG00000164023	SGMS2
C1	ENSG00000160781	PAQR6
C1	ENSG00000175854	SWI5
C1	ENSG00000141469	SLC14A1
C1	ENSG00000149806	FAU
C1	ENSG00000167216	KATNAL2
C1	ENSG00000130731	C16orf13
C1	ENSG00000168385	SEPT2
C1	ENSG00000149489	ROM1
C1	ENSG00000167315	ACAA2
C1	ENSG00000134716	CYP2J2
C1	ENSG00000114779	ABHD14B
C1	ENSG00000134042	MRO
C1	ENSG00000137198	GMPR
C1	ENSG00000172366	FAM195A
C1	ENSG00000185187	SIGIRR
C1	ENSG00000164089	AGXT2L1
C1	ENSG00000164751	PEX2
C1	ENSG00000166816	LDHD
C1	ENSG00000132570	PCBD2
C1	ENSG00000101542	CDH20
C1	ENSG00000166228	PCBD1
C1	ENSG00000111875	ASF1A
C1	ENSG00000179364	PACS2
C1	ENSG00000166295	ANAPC16
C1	ENSG00000132613	MTSS1L
C1	ENSG00000168393	DTYMK
C1	ENSG00000108107	RPL28
C1	ENSG00000063241	ISOC2
C1	ENSG00000105258	POLR2I
C1	ENSG00000104472	CHRAC1
C1	ENSG00000197971	MBP
C1	ENSG00000169813	HNRNPF
C1	ENSG00000137177	KIF13A
C1	ENSG00000166822	TMEM170A
C1	ENSG00000185340	GAS2L1
C1	ENSG00000119333	WDR34
C1	ENSG00000011198	ABHD5
C1	ENSG00000051620	HEBP2
C1	ENSG00000174720	LARP7
C1	ENSG00000177042	TMEM80
C1	ENSG00000126215	XRCC3
C1	ENSG00000112304	ACOT13
C1	ENSG00000129151	BBOX1
C1	ENSG00000172819	RARG
C1	ENSG00000112312	GMNN
C1	ENSG00000100319	ZMAT5
C1	ENSG00000100325	ASCC2
C1	ENSG00000100711	ZFYVE21
C1	ENSG00000133739	LRRCC1
C1	ENSG00000081377	CDC14B
C1	ENSG00000111907	TPD52L1
C1	ENSG00000148700	ADD3
C1	ENSG00000100575	TIMM9
C1	ENSG00000123349	PFDN5
C1	ENSG00000120729	MYOT
C1	ENSG00000111906	HDDC2
C1	ENSG00000089177	KIF16B
C1	ENSG00000169964	TMEM42
C1	ENSG00000260175
C1	ENSG00000163719	MTMR14
C1	ENSG00000179943	FIZ1
C1	ENSG00000171443	ZNF524
C1	ENSG00000164587	RPS14
C1	ENSG00000109911	ELP4
C1	ENSG00000180801	ARSJ
C1	ENSG00000119950	MXI1
C1	ENSG00000079337	RAPGEF3
C1	ENSG00000089006	SNX5
C1	ENSG00000123104	ITPR2
C1	ENSG00000133316	WDR74
C1	ENSG00000125871	C20orf72
C1	ENSG00000166164	BRD7
C1	ENSG00000168309	FAM107A
C1	ENSG00000126785	RHOJ
C1	ENSG00000104325	DECR1
C1	ENSG00000112167	SAYSD1
C1	ENSG00000125820	NKX2-2
C1	ENSG00000163702	IL17RC
C1	ENSG00000103449	SALL1
C1	ENSG00000188785	ZNF548
C1	ENSG00000178764	ZHX2
C1	ENSG00000155324	GRAMD3
C1	ENSG00000176476	CCDC101
C1	ENSG00000164904	ALDH7A1
C1	ENSG00000001167	NFYA
C1	ENSG00000213445	SIPA1
C1	ENSG00000119699	TGFB3
C1	ENSG00000012048	BRCA1
C1	ENSG00000064787	BCAS1
C1	ENSG00000115286	NDUFS7
C1	ENSG00000104881	PPP1R13L
C1	ENSG00000198242	RPL23A
C1	ENSG00000130725	UBE2M
C1	ENSG00000122406	RPL5
C1	ENSG00000128185	DGCR6L
C1	ENSG00000092621	PHGDH
C1	ENSG00000115268	RPS15
C1	ENSG00000185761	ADAMTSL5
C1	ENSG00000071564	TCF3
C1	ENSG00000144848	ATG3
C1	ENSG00000112531	QKI
C1	ENSG00000133069	TMCC2
C1	ENSG00000129968	FAM108A1
C1	ENSG00000117266	CDK18
C1	ENSG00000175334	BANF1
C1	ENSG00000113732	ATP6V0E1
C1	ENSG00000196531	NACA
C1	ENSG00000101400	SNTA1
C1	ENSG00000128311	TST
C1	ENSG00000167526	RPL13
C1	ENSG00000117280	RAB7L1
C1	ENSG00000128309	MPST
C1	ENSG00000112561	TFEB
C1	ENSG00000198818	SFT2D1
C1	ENSG00000128228	SDF2L1
C1	ENSG00000138029	HADHB
C1	ENSG00000078804	TP53INP2
C1	ENSG00000102805	CLN5
C1	ENSG00000068903	SIRT2
C1	ENSG00000117543	DPH5
C1	ENSG00000104825	NFKBIB
C1	ENSG00000198252	STYX
C1	ENSG00000006042	TMEM98
C1	ENSG00000117691	NENF
C1	ENSG00000103550	C16orf88
C1	ENSG00000107829	FBXW4
C1	ENSG00000166508	MCM7
C1	ENSG00000143353	LYPLAL1
C1	ENSG00000177917	ARL6IP6
C1	ENSG00000146063	TRIM41
C1	ENSG00000049245	VAMP3
C1	ENSG00000188039	NWD1
C1	ENSG00000121957	GPSM2
C1	ENSG00000099840	IZUMO4
C1	ENSG00000013306	SLC25A39
C1	ENSG00000213002
C1	ENSG00000108270	AATF
C1	ENSG00000143819	EPHX1
C1	ENSG00000147592	LACTB2
C1	ENSG00000213420	GPC2
C1	ENSG00000228474	OST4
C1	ENSG00000144283	PKP4
C1	ENSG00000124440	HIF3A
C1	ENSG00000110011	DNAJC4
C1	ENSG00000143994	ABHD1
C1	ENSG00000173511	VEGFB
C1	ENSG00000078487	ZCWPW1
C1	ENSG00000165475	CRYL1
C1	ENSG00000080839	RBL1
C1	ENSG00000162441	LZIC
C1	ENSG00000111087	GLI1
C1	ENSG00000173914	RBM4B
C1	ENSG00000166925	TSC22D4
C1	ENSG00000172458	IL17D
C1	ENSG00000144713	RPL32
C1	ENSG00000173264	GPR137
C1	ENSG00000160307	S100B
C1	ENSG00000184678	HIST2H2BE
C1	ENSG00000125691	RPL23
C1	ENSG00000102699	PARP4
C1	ENSG00000106330	MOSPD3
C1	ENSG00000108298	RPL19
C1	ENSG00000088826	SMOX
C1	ENSG00000130717	UCK1
C1	ENSG00000170370	EMX2
C1	ENSG00000175197	DDIT3
C1	ENSG00000112664	NUDT3
C1	ENSG00000132646	PCNA
C1	ENSG00000139800	ZIC5
C1	ENSG00000100568	VTI1B
C1	ENSG00000169738	DCXR
C1	ENSG00000203805	PPAPDC1A
C1	ENSG00000111639	MRPL51
C1	ENSG00000186184	POLR1D
C1	ENSG00000156482	RPL30
C1	ENSG00000186998	EMID1
C1	ENSG00000141741	MIEN1
C1	ENSG00000132681	ATP1A4
C1	ENSG00000131097	HIGD1B
C1	ENSG00000153140	CETN3
C1	ENSG00000105227	PRX
C1	ENSG00000167565	SERTAD3
C1	ENSG00000186281	GPAT2
C1	ENSG00000087077	TRIP6
C1	ENSG00000132541	HRSP12
C1	ENSG00000064961	HMG20B
C1	ENSG00000166912	MTMR10
C1	ENSG00000112333	NR2E1
C1	ENSG00000123815	ADCK4
C1	ENSG00000121104	FAM117A
C1	ENSG00000188493	C19orf54
C1	ENSG00000111196	MAGOHB
C1	ENSG00000165175	MID1IP1
C1	ENSG00000169857	AVEN
C1	ENSG00000132109	TRIM21
C1	ENSG00000152022	LIX1L
C1	ENSG00000188038	NRN1L
C1	ENSG00000166578	IQCD
C1	ENSG00000100300	TSPO
C1	ENSG00000164292	RHOBTB3
C1	ENSG00000184007	PTP4A2
C1	ENSG00000149922	TBX6
C1	ENSG00000106400	ZNHIT1
C1	ENSG00000140497	SCAMP2
C1	ENSG00000168303	C7orf11
C1	ENSG00000149262	INTS4
C1	ENSG00000211584	SLC48A1
C1	ENSG00000126351	THRA
C1	ENSG00000174444	RPL4
C1	ENSG00000196683	TOMM7
C1	ENSG00000159063	ALG8
C1	ENSG00000124479	NDP
C1	ENSG00000064393	HIPK2
C1	ENSG00000102882	MAPK3
C1	ENSG00000185250	PPIL6
C1	ENSG00000116044	NFE2L2
C1	ENSG00000173040	EVC2
C1	ENSG00000152404	CWF19L2
C1	ENSG00000149932	TMEM219
C1	ENSG00000130988	RGN
C1	ENSG00000150760	DOCK1
C1	ENSG00000116478	HDAC1
C1	ENSG00000214456	PLIN5
C1	ENSG00000072736	NFATC3
C1	ENSG00000005075	POLR2J
C1	ENSG00000164543	STK17A
C1	ENSG00000175130	MARCKSL1
C1	ENSG00000225828
C1	ENSG00000182103	FAM181B
C1	ENSG00000140319	SRP14
C1	ENSG00000179526	SHARPIN
C1	ENSG00000173436	MINOS1
C1	ENSG00000214530	STARD10
C1	ENSG00000102760	C13orf15
C1	ENSG00000184304	PRKD1
C1	ENSG00000146966	DENND2A
C1	ENSG00000163820	FYCO1
C1	ENSG00000187735	TCEA1
C1	ENSG00000165449	SLC16A9
C1	ENSG00000169627	BOLA2B
C1	ENSG00000145555	MYO10
C1	ENSG00000173801	JUP
C1	ENSG00000204682	C10orf114
C1	ENSG00000136940	PDCL
C1	ENSG00000116786	PLEKHM2
C1	ENSG00000133112	TPT1
C1	ENSG00000121900	TMEM54
C1	ENSG00000185437	SH3BGR
C1	ENSG00000128708	HAT1
C1	ENSG00000136770	DNAJC1
C1	ENSG00000166441	RPL27A
C1	ENSG00000131781	FMO5
C1	ENSG00000103024	NME3
C1	ENSG00000138326	RPS24
C1	ENSG00000111266	DUSP16
C1	ENSG00000165795	NDRG2
C1	ENSG00000145425	RPS3A
C1	ENSG00000130304	SLC27A1
C1	ENSG00000130313	PGLS
C1	ENSG00000021300	PLEKHB1
C1	ENSG00000214397
C1	ENSG00000165424	ZCCHC24
C1	ENSG00000103145	HCFC1R1
C1	ENSG00000160325	C9orf7
C1	ENSG00000157191	NECAP2
C1	ENSG00000144451	SPAG16
C1	ENSG00000076248	UNG
C1	ENSG00000178057	NDUFAF3
C1	ENSG00000196507	TCEAL3
C1	ENSG00000125652	ALKBH7
C1	ENSG00000076555	ACACB
C1	ENSG00000100075	SLC25A1
C1	ENSG00000182108	DEXI
C1	ENSG00000198721	ECI2
C1	ENSG00000148450	MSRB2
C1	ENSG00000106628	POLD2
C1	ENSG00000175575	PAAF1
C1	ENSG00000254087	LYN
C1	ENSG00000044115	CTNNA1
C1	ENSG00000118181	RPS25
C1	ENSG00000239779	WBP1
C1	ENSG00000117115	PADI2
C1	ENSG00000106633	GCK
C1	ENSG00000214194
C1	ENSG00000008988	RPS20
C1	ENSG00000185608	MRPL40
C1	ENSG00000160801	PTH1R
C1	ENSG00000123453	SARDH
C1	ENSG00000048342	CC2D2A
C1	ENSG00000136147	PHF11
C1	ENSG00000143919	CAMKMT
C1	ENSG00000137818	RPLP1
C1	ENSG00000165675	ENOX2
C1	ENSG00000159423	ALDH4A1
C1	ENSG00000133131	MORC4
C1	ENSG00000169957	ZNF768
C1	ENSG00000099256	PRTFDC1
C1	ENSG00000054148	PHPT1
C1	ENSG00000229809	ZNF688
C1	ENSG00000114859	CLCN2
C1	ENSG00000106689	LHX2
C1	ENSG00000185122	HSF1
C1	ENSG00000196091	MYBPC1
C1	ENSG00000093010	COMT
C1	ENSG00000113578	FGF1
C1	ENSG00000102032	RENBP
C1	ENSG00000151665	PIGF
C1	ENSG00000155115	GTF3C6
C1	ENSG00000026508	CD44
C1	ENSG00000142676	RPL11
C1	ENSG00000004866	ST7
C1	ENSG00000063177	RPL18
C1	ENSG00000185088	RPS27L
C1	ENSG00000136425	CIB2
C1	ENSG00000120963	ZNF706
C1	ENSG00000105700	KXD1
C1	ENSG00000115325	DOK1
C1	ENSG00000111666	CHPT1
C1	ENSG00000197756	RPL37A
C1	ENSG00000137463	C4orf49
C1	ENSG00000166595	FAM96B
C1	ENSG00000176909	MAMSTR
C1	ENSG00000092199	HNRNPC
C1	ENSG00000105552	BCAT2
C1	ENSG00000163879	DNALI1
C1	ENSG00000164039	BDH2
C1	ENSG00000115507	OTX1
C1	ENSG00000136518	ACTL6A
C1	ENSG00000136942	RPL35
C1	ENSG00000148362	C9orf142
C1	ENSG00000198130	HIBCH
C1	ENSG00000087086	FTL
C1	ENSG00000212747	FAM127C
C1	ENSG00000075188	NUP37
C1	ENSG00000214022	REPIN1
C1	ENSG00000133195	SLC39A11
C1	ENSG00000203950	FAM127B
C1	ENSG00000107175	CREB3
C1	ENSG00000136869	TLR4
C1	ENSG00000167107	ACSF2
C1	ENSG00000115364	MRPL19
C1	ENSG00000169504	CLIC4
C1	ENSG00000197982	C1orf122
C1	ENSG00000165730	STOX1
C1	ENSG00000181240	SLC25A41
C1	ENSG00000106565	TMEM176B
C1	ENSG00000164104	HMGB2
C1	ENSG00000002933	TMEM176A
C1	ENSG00000158417	EIF5B
C1	ENSG00000129521	EGLN3
C1	ENSG00000173473	SMARCC1
C1	ENSG00000254505	CHMP4A
C1	ENSG00000168522	FNTA
C1	ENSG00000164105	SAP30
C1	ENSG00000213999	MEF2B
C1	ENSG00000135097	MSI1
C1	ENSG00000164106	SCRG1
C1	ENSG00000140264	SERF2
C1	ENSG00000242028	C15orf63
C1	ENSG00000149273	RPS3
C1	ENSG00000164117	FBXO8
C1	ENSG00000064490	RFXANK
C1	ENSG00000010810	FYN
C1	ENSG00000174748	RPL15
C1	ENSG00000129515	SNX6
C1	ENSG00000136436	CALCOCO2
C1	ENSG00000107902	LHPP
C1	ENSG00000158315	RHBDL2
C1	ENSG00000144579	CTDSP1
C1	ENSG00000137154	RPS6
C1	ENSG00000120742	SERP1
C1	ENSG00000047849	MAP4
C1	ENSG00000039560	RAI14
C1	ENSG00000166337	TAF10
C1	ENSG00000167085	PHB
C1	ENSG00000165886	UBTD1
C1	ENSG00000167272	POP5
C1	ENSG00000086189	DIMT1
C1	ENSG00000071082	RPL31
C1	ENSG00000135912	TTLL4
C1	ENSG00000142534	RPS11
C1	ENSG00000122971	ACADS
C1	ENSG00000119487	MAPKAP1
C1	ENSG00000126456	IRF3
C1	ENSG00000077713	SLC25A43
C1	ENSG00000180354	C7orf41
C1	ENSG00000119403	PHF19
C1	ENSG00000198121	LPAR1
C1	ENSG00000147127	RAB41
C1	ENSG00000103876	FAH
C1	ENSG00000008394	MGST1
C1	ENSG00000183621	ZNF438
C1	ENSG00000143995	MEIS1
C1	ENSG00000213722	DDAH2
C1	ENSG00000145431	PDGFC
C1	ENSG00000130055	GDPD2
C1	ENSG00000142669	SH3BGRL3
C1	ENSG00000115541	HSPE1
C1	ENSG00000119632	IFI27L2
C1	ENSG00000147677	EIF3H
C1	ENSG00000162944	RFTN2
C1	ENSG00000104529	EEF1D
C1	ENSG00000133835	HSD17B4
C1	ENSG00000147905	ZCCHC7
C1	ENSG00000071054	MAP4K4
C1	ENSG00000167081	PBX3
C1	ENSG00000243056	EIF4EBP3
C1	ENSG00000204852	TCTN1
C1	ENSG00000170759	KIF5B
C1	ENSG00000115239	ASB3
C1	ENSG00000100485	SOS2
C1	ENSG00000185634	SHC4
C1	ENSG00000119943	PYROXD2
C1	ENSG00000205106
C1	ENSG00000213689	TREX1
C1	ENSG00000186298	PPP1CC
C1	ENSG00000205707	LYRM5
C1	ENSG00000156958	GALK2
C1	ENSG00000142765	SYTL1
C1	ENSG00000198324	FAM109A
C1	ENSG00000114268	PFKFB4
C1	ENSG00000109066	TMEM104
C1	ENSG00000158186	MRAS
C1	ENSG00000161513	FDXR
C1	ENSG00000066185	ZMYND12
C1	ENSG00000135365	PHF21A
C1	ENSG00000136044	APPL2
C1	ENSG00000168894	RNF181
C1	ENSG00000128585	MKLN1
C1	ENSG00000168890	TMEM150A
C1	ENSG00000119929	CUTC
C1	ENSG00000147576	ADHFE1
C1	ENSG00000215902
C1	ENSG00000165959	CLMN
C1	ENSG00000152492	CCDC50
C1	ENSG00000180900	SCRIB
C1	ENSG00000204138	PHACTR4
C1	ENSG00000164188	RANBP3L
C1	ENSG00000114850	SSR3
C1	ENSG00000235162	C12orf75
C1	ENSG00000110002	VWA5A
C1	ENSG00000168310	IRF2
C1	ENSG00000112851	ERBB2IP
C1	ENSG00000010361	FUZ
C1	ENSG00000163864	NMNAT3
C1	ENSG00000197958	RPL12
C1	ENSG00000143947	RPS27A
C1	ENSG00000153048	CARHSP1
C1	ENSG00000127952	STYXL1
C1	ENSG00000176101	SSNA1
C1	ENSG00000154134	ROBO3
C1	ENSG00000111275	ALDH2
C1	ENSG00000184384	MAML2
C1	ENSG00000106211	HSPB1
C1	ENSG00000105894	PTN
C1	ENSG00000122557	HERPUD2
C1	ENSG00000205246	RPSAP58
C1	ENSG00000257103	LSM14A
C1	ENSG00000130787	HIP1R
C1	ENSG00000143622	RIT1
C1	ENSG00000089009	RPL6
C1	ENSG00000116096	SPR
C1	ENSG00000105357	MYH14
C1	ENSG00000161677	JOSD2
C1	ENSG00000204653	ASPDH
C1	ENSG00000105698	USF2
C1	ENSG00000135838	NPL
C1	ENSG00000242252	BGLAP
C1	ENSG00000143443	C1orf56
C1	ENSG00000079999	KEAP1
C1	ENSG00000143458	GABPB2
C1	ENSG00000154945	ANKRD40
C1	ENSG00000105619	TFPT
C1	ENSG00000183401	CCDC159
C1	ENSG00000223547	ZNF844
C1	ENSG00000105607	GCDH
C1	ENSG00000160678	S100A1
C1	ENSG00000143553	SNAPIN
C1	ENSG00000253506	NACA2
C2	ENSG00000178171	FAM123C
C2	ENSG00000184185	KCNJ12
C2	ENSG00000212719	C17orf51
C2	ENSG00000007171	NOS2
C2	ENSG00000253719	ATXN7L3B
C2	ENSG00000007237	GAS7
C2	ENSG00000087111	PIGS
C2	ENSG00000114554	PLXNA1
C2	ENSG00000013016	EHD3
C2	ENSG00000144120	TMEM177
C2	ENSG00000084234	APLP2
C2	ENSG00000158109	TPRG1L
C2	ENSG00000006740	ARHGAP44
C2	ENSG00000133424	LARGE
C2	ENSG00000205356	TECPR1
C2	ENSG00000196581	AJAP1
C2	ENSG00000105737	GRIK5
C2	ENSG00000101337	TM9SF4
C2	ENSG00000105429	MEGF8
C2	ENSG00000133030	MPRIP
C2	ENSG00000134917	ADAMTS8
C2	ENSG00000160145	KALRN
C2	ENSG00000135709	KIAA0513
C2	ENSG00000151502	VPS26B
C2	ENSG00000116237	ICMT
C2	ENSG00000101152	DNAJC5
C2	ENSG00000006210	CX3CL1
C2	ENSG00000170324	FRMPD2
C2	ENSG00000183873	SCN5A
C2	ENSG00000163053	SLC16A14
C2	ENSG00000170579	DLGAP1
C2	ENSG00000135677	GNS
C2	ENSG00000145911	N4BP3
C2	ENSG00000135392	DNAJC14
C2	ENSG00000172568	FNDC9
C2	ENSG00000140945	CDH13
C2	ENSG00000135074	ADAM19
C2	ENSG00000119771	KLHL29
C2	ENSG00000034053	APBA2
C2	ENSG00000055163	CYFIP2
C2	ENSG00000141252	VPS53
C2	ENSG00000011347	SYT7
C2	ENSG00000134780	DAGLA
C2	ENSG00000183665	TRMT12
C2	ENSG00000165495	PKNOX2
C2	ENSG00000107282	APBA1
C2	ENSG00000066248	NGEF
C2	ENSG00000145860	RNF145
C2	ENSG00000174231	PRPF8
C2	ENSG00000135454	B4GALNT1
C2	ENSG00000112941	PAPD7
C2	ENSG00000198108	CHSY3
C2	ENSG00000186094	AGBL4
C2	ENSG00000066827	ZFAT
C2	ENSG00000012232	EXTL3
C2	ENSG00000165526	RPUSD4
C2	ENSG00000145016	KIAA0226
C2	ENSG00000147724	FAM135B
C2	ENSG00000136928	GABBR2
C2	ENSG00000196305	IARS
C2	ENSG00000092203	TOX4
C2	ENSG00000138759	FRAS1
C2	ENSG00000156515	HK1
C2	ENSG00000169992	NLGN2
C2	ENSG00000088538	DOCK3
C2	ENSG00000181222	POLR2A
C2	ENSG00000104687	GSR
C2	ENSG00000197043	ANXA6
C2	ENSG00000110042	DTX4
C2	ENSG00000073008	PVR
C2	ENSG00000134775	FHOD3
C2	ENSG00000162981	FAM84A
C2	ENSG00000104228	TRIM35
C2	ENSG00000111110	PPM1H
C2	ENSG00000103264	FBXO31
C2	ENSG00000101638	ST8SIA5
C2	ENSG00000134030	CTIF
C2	ENSG00000167114	SLC27A4
C2	ENSG00000172731	LRRC20
C2	ENSG00000089597	GANAB
C2	ENSG00000181852	RNF41
C2	ENSG00000249242	TMEM150C
C2	ENSG00000116604	MEF2D
C2	ENSG00000148843	PDCD11
C2	ENSG00000164733	CTSB
C2	ENSG00000164086	DUSP7
C2	ENSG00000141668	CBLN2
C2	ENSG00000165238	WNK2
C2	ENSG00000198915	RASGEF1A
C2	ENSG00000240694	PNMA2
C2	ENSG00000156395	SORCS3
C2	ENSG00000102466	FGF14
C2	ENSG00000096070	BRPF3
C2	ENSG00000107957	SH3PXD2A
C2	ENSG00000125827	TMX4
C2	ENSG00000113716	HMGXB3
C2	ENSG00000137261	KIAA0319
C2	ENSG00000062485	CS
C2	ENSG00000108039	XPNPEP1
C2	ENSG00000171617	ENC1
C2	ENSG00000103023	PRSS54
C2	ENSG00000234857
C2	ENSG00000166501	PRKCB
C2	ENSG00000103034	NDRG4
C2	ENSG00000101349	PAK7
C2	ENSG00000153395	LPCAT1
C2	ENSG00000006116	CACNG3
C2	ENSG00000177733	HNRNPA0
C2	ENSG00000107758	PPP3CB
C2	ENSG00000205423	TMEM188
C2	ENSG00000156959	LHFPL4
C2	ENSG00000125851	PCSK2
C2	ENSG00000258986	TMEM179
C2	ENSG00000119383	PPP2R4
C2	ENSG00000167281	RBFOX3
C2	ENSG00000168539	CHRM1
C2	ENSG00000065491	TBC1D22B
C2	ENSG00000078902	TOLLIP
C2	ENSG00000124140	SLC12A5
C2	ENSG00000198700	IPO9
C2	ENSG00000100422	CERK
C2	ENSG00000077235	GTF3C1
C2	ENSG00000156564	LRFN2
C2	ENSG00000033627	ATP6V0A1
C2	ENSG00000163399	ATP1A1
C2	ENSG00000158470	B4GALT5
C2	ENSG00000143061	IGSF3
C2	ENSG00000134247	PTGFRN
C2	ENSG00000198863	RUNDC1
C2	ENSG00000124217	MOCS3
C2	ENSG00000054793	ATP9A
C2	ENSG00000020256	ZFP64
C2	ENSG00000054803	CBLN4
C2	ENSG00000254470
C2	ENSG00000083812	ZNF324
C2	ENSG00000063015	SEZ6
C2	ENSG00000108861	DUSP3
C2	ENSG00000136099	PCDH8
C2	ENSG00000241973	PI4KA
C2	ENSG00000174514	MFSD4
C2	ENSG00000084731	KIF3C
C2	ENSG00000089818	NECAP1
C2	ENSG00000170091
C2	ENSG00000131242	RAB11FIP4
C2	ENSG00000164466	SFXN1
C2	ENSG00000076356	PLXNA2
C2	ENSG00000113749	HRH2
C2	ENSG00000072518	MARK2
C2	ENSG00000128266	GNAZ
C2	ENSG00000100228	RAB36
C2	ENSG00000059804	SLC2A3
C2	ENSG00000197381	ADARB1
C2	ENSG00000125966	MMP24
C2	ENSG00000065970	FOXJ2
C2	ENSG00000114573	ATP6V1A
C2	ENSG00000162706	CADM3
C2	ENSG00000151079	KCNA6
C2	ENSG00000178235	SLITRK1
C2	ENSG00000165300	SLITRK5
C2	ENSG00000007923	DNAJC11
C2	ENSG00000127526	SLC35E1
C2	ENSG00000162989	KCNJ3
C2	ENSG00000100221	JOSD1
C2	ENSG00000197283	SYNGAP1
C2	ENSG00000221890	NPTXR
C2	ENSG00000072954	TMEM38A
C2	ENSG00000070182	SPTB
C2	ENSG00000162426	SLC45A1
C2	ENSG00000065000	AP3D1
C2	ENSG00000116299	KIAA1324
C2	ENSG00000100321	SYNGR1
C2	ENSG00000128268	MGAT3
C2	ENSG00000183662	FAM19A1
C2	ENSG00000169258	GPRIN1
C2	ENSG00000161682	FAM171A2
C2	ENSG00000185800	DMWD
C2	ENSG00000143179	UCK2
C2	ENSG00000143801	PSEN2
C2	ENSG00000154639	CXADR
C2	ENSG00000143126	CELSR2
C2	ENSG00000088812	ATRN
C2	ENSG00000186487	MYT1L
C2	ENSG00000011485	PPP5C
C2	ENSG00000182013	PNMAL1
C2	ENSG00000160014	CALM3
C2	ENSG00000181754	AMIGO1
C2	ENSG00000165868	HSPA12A
C2	ENSG00000102572	STK24
C2	ENSG00000100095	SEZ6L
C2	ENSG00000173898	SPTBN2
C2	ENSG00000128203	ASPHD2
C2	ENSG00000177614	PGBD5
C2	ENSG00000159164	SV2A
C2	ENSG00000182674	KCNB2
C2	ENSG00000132821	VSTM2L
C2	ENSG00000090674	MCOLN1
C2	ENSG00000112640	PPP2R5D
C2	ENSG00000114861	FOXP1
C2	ENSG00000197106	SLC6A17
C2	ENSG00000067191	CACNB1
C2	ENSG00000107862	GBF1
C2	ENSG00000178974	FBXO34
C2	ENSG00000107651	SEC23IP
C2	ENSG00000176490	DIRAS1
C2	ENSG00000198793	MTOR
C2	ENSG00000103316	CRYM
C2	ENSG00000081842	PCDHA6
C2	ENSG00000139514	SLC7A1
C2	ENSG00000161082	CELF5
C2	ENSG00000150995	ITPR1
C2	ENSG00000204961	PCDHA9
C2	ENSG00000130227	XPO7
C2	ENSG00000251664	PCDHA12
C2	ENSG00000159140	SON
C2	ENSG00000073910	FRY
C2	ENSG00000185518	SV2B
C2	ENSG00000011021	CLCN6
C2	ENSG00000243232	PCDHAC2
C2	ENSG00000197852	FAM212B
C2	ENSG00000141568	FOXK2
C2	ENSG00000197296	FITM2
C2	ENSG00000171385	KCND3
C2	ENSG00000171462	DLK2
C2	ENSG00000112852	PCDHB2
C2	ENSG00000132824	SERINC3
C2	ENSG00000136504	KAT7
C2	ENSG00000182220	ATP6AP2
C2	ENSG00000167654	ATCAY
C2	ENSG00000145242	EPHA5
C2	ENSG00000166908	PIP4K2C
C2	ENSG00000140199	SLC12A6
C2	ENSG00000144597	EAF1
C2	ENSG00000005884	ITGA3
C2	ENSG00000186732	MPPED1
C2	ENSG00000135631	RAB11FIP5
C2	ENSG00000186642	PDE2A
C2	ENSG00000162065	TBC1D24
C2	ENSG00000130540	SULT4A1
C2	ENSG00000025800	KPNA6
C2	ENSG00000131504	DIAPH1
C2	ENSG00000180440	SERTM1
C2	ENSG00000156471	PTDSS1
C2	ENSG00000151176	PLBD2
C2	ENSG00000135956	TMEM127
C2	ENSG00000198794	SCAMP5
C2	ENSG00000144028	SNRNP200
C2	ENSG00000067842	ATP2B3
C2	ENSG00000127463	KIAA0090
C2	ENSG00000165194	PCDH19
C2	ENSG00000103042	SLC38A7
C2	ENSG00000075035	WSCD2
C2	ENSG00000072832	CRMP1
C2	ENSG00000116731	PRDM2
C2	ENSG00000157800	SLC37A3
C2	ENSG00000181215	C4orf50
C2	ENSG00000118160	SLC8A2
C2	ENSG00000138162	TACC2
C2	ENSG00000120696	KBTBD7
C2	ENSG00000180543	TSPYL5
C2	ENSG00000110675	ELMOD1
C2	ENSG00000158748	HTR6
C2	ENSG00000166949	SMAD3
C2	ENSG00000106609	C7orf42
C2	ENSG00000055813	CCDC85A
C2	ENSG00000013288	MAN2B2
C2	ENSG00000102385	DRP2
C2	ENSG00000116138	DNAJC16
C2	ENSG00000102804	TSC22D1
C2	ENSG00000091136	LAMB1
C2	ENSG00000198354	DCAF12L2
C2	ENSG00000137267	TUBB2A
C2	ENSG00000121905	HPCA
C2	ENSG00000116514	RNF19B
C2	ENSG00000068438	FTSJ1
C2	ENSG00000110427	C11orf41
C2	ENSG00000122126	OCRL
C2	ENSG00000183454	GRIN2A
C2	ENSG00000115844	DLX2
C2	ENSG00000186188	O3FAR1
C2	ENSG00000176769	TCERG1L
C2	ENSG00000169371	SNUPN
C2	ENSG00000166111	SVOP
C2	ENSG00000103647	CORO2B
C2	ENSG00000122733	KIAA1045
C2	ENSG00000156453	PCDH1
C2	ENSG00000175040	CHST2
C2	ENSG00000070413	DGCR2
C2	ENSG00000029364	SLC39A9
C2	ENSG00000160716	CHRNB2
C2	ENSG00000160710	ADAR
C2	ENSG00000084444	KIAA1467
C2	ENSG00000185742	C11orf87
C2	ENSG00000102003	SYP
C2	ENSG00000175182	FAM131A
C2	ENSG00000166887	VPS39
C2	ENSG00000177981	ASB8
C2	ENSG00000144645	OSBPL10
C2	ENSG00000082213	C5orf22
C2	ENSG00000137216	TMEM63B
C2	ENSG00000204619	PPP1R11
C2	ENSG00000177875	C12orf68
C2	ENSG00000149428	HYOU1
C2	ENSG00000215012	C22orf29
C2	ENSG00000131507	NDFIP1
C2	ENSG00000142686	C1orf216
C2	ENSG00000198420	FAM115A
C2	ENSG00000103056	SMPD3
C2	ENSG00000108219	TSPAN14
C2	ENSG00000156853	ZNF689
C2	ENSG00000214517	PPME1
C2	ENSG00000110514	MADD
C2	ENSG00000171914	TLN2
C2	ENSG00000169783	LINGO1
C2	ENSG00000100678	SLC8A3
C2	ENSG00000174136	RGMB
C2	ENSG00000185737	NRG3
C2	ENSG00000015676	NUDCD3
C2	ENSG00000237515	SHISA9
C2	ENSG00000111737	RAB35
C2	ENSG00000144583	MARCH4
C2	ENSG00000100600	LGMN
C2	ENSG00000127561	SYNGR3
C2	ENSG00000172375	C2CD2L
C2	ENSG00000124313	IQSEC2
C2	ENSG00000005108	THSD7A
C2	ENSG00000084463	WBP11
C2	ENSG00000145147	SLIT2
C2	ENSG00000178031	ADAMTSL1
C2	ENSG00000008853	RHOBTB2
C2	ENSG00000154917	RAB6B
C2	ENSG00000146147	MLIP
C2	ENSG00000172350	ABCG4
C2	ENSG00000095203	EPB41L4B
C2	ENSG00000204574	ABCF1
C2	ENSG00000119401	TRIM32
C2	ENSG00000185090	MANEAL
C2	ENSG00000151952	TMEM132D
C2	ENSG00000103429	BFAR
C2	ENSG00000196449	YRDC
C2	ENSG00000162104	ADCY9
C2	ENSG00000182022	CHST15
C2	ENSG00000176204	LRRTM4
C2	ENSG00000060709	RIMBP2
C2	ENSG00000151490	PTPRO
C2	ENSG00000196876	SCN8A
C2	ENSG00000130558	OLFM1
C2	ENSG00000147457	CHMP7
C2	ENSG00000171208	NETO2
C2	ENSG00000173705	SUSD5
C2	ENSG00000132604	TERF2
C2	ENSG00000162951	LRRTM1
C2	ENSG00000165102	HGSNAT
C2	ENSG00000169116	PARM1
C2	ENSG00000204427	ABHD16A
C2	ENSG00000109436	TBC1D9
C2	ENSG00000080503	SMARCA2
C2	ENSG00000135503	ACVR1B
C2	ENSG00000182732	RGS6
C2	ENSG00000058335	RASGRF1
C2	ENSG00000183049	CAMK1D
C2	ENSG00000204310	AGPAT1
C2	ENSG00000104888	SLC17A7
C2	ENSG00000011523	CEP68
C2	ENSG00000174437	ATP2A2
C2	ENSG00000198010	DLGAP2
C2	ENSG00000158008	EXTL1
C2	ENSG00000128594	LRRC4
C2	ENSG00000171160	MORN4
C2	ENSG00000099365	STX1B
C2	ENSG00000253729	PRKDC
C2	ENSG00000166159	LRTM2
C2	ENSG00000155256	ZFYVE27
C2	ENSG00000082458	DLG3
C2	ENSG00000106688	SLC1A1
C2	ENSG00000164588	HCN1
C2	ENSG00000164742	ADCY1
C2	ENSG00000128045	RASL11B
C2	ENSG00000181467	RAP2B
C2	ENSG00000156642	NPTN
C2	ENSG00000117682	DHDDS
C2	ENSG00000131238	PPT1
C2	ENSG00000144567	FAM134A
C2	ENSG00000183090	FREM3
C2	ENSG00000183117	CSMD1
C2	ENSG00000072201	LNX1
C2	ENSG00000140632	GLYR1
C2	ENSG00000119682	KIAA0317
C2	ENSG00000130559	CAMSAP1
C2	ENSG00000073849	ST6GAL1
C2	ENSG00000152034	MCHR2
C2	ENSG00000084070	SMAP2
C2	ENSG00000175077	RTP1
C2	ENSG00000214670
C2	ENSG00000117016	RIMS3
C2	ENSG00000019505	SYT13
C2	ENSG00000118804	STBD1
C2	ENSG00000090020	SLC9A1
C2	ENSG00000121671	CRY2
C2	ENSG00000133627	ACTR3B
C2	ENSG00000123901	GPR83
C2	ENSG00000186212	ANKRD56
C2	ENSG00000130226	DPP6
C2	ENSG00000111249	CUX2
C2	ENSG00000159720	ATP6V0D1
C2	ENSG00000110931	CAMKK2
C2	ENSG00000119946	CNNM1
C2	ENSG00000149260	CAPN5
C2	ENSG00000177181	RIMKLA
C2	ENSG00000120053	GOT1
C2	ENSG00000078328	RBFOX1
C2	ENSG00000115641	FHL2
C2	ENSG00000247077	PGAM5
C2	ENSG00000105983	LMBR1
C2	ENSG00000187189	TSPYL4
C2	ENSG00000189241	TSPYL1
C2	ENSG00000009335	UBE3C
C2	ENSG00000135213	POM121C
C2	ENSG00000166257	SCN3B
C2	ENSG00000188760	TMEM198
C2	ENSG00000176095	IP6K1
C2	ENSG00000106852	LHX6
C2	ENSG00000149269	PAK1
C2	ENSG00000102181	CD99L2
C2	ENSG00000169085	C8orf46
C2	ENSG00000152092	ASTN1
C2	ENSG00000110497	AMBRA1
C2	ENSG00000198752	CDC42BPB
C2	ENSG00000189159	HN1
C2	ENSG00000198797	FAM5B
C2	ENSG00000168872	DDX19A
C2	ENSG00000204969	PCDHA2
C2	ENSG00000163082	SGPP2
C2	ENSG00000142949	PTPRF
C2	ENSG00000134644	PUM1
C2	ENSG00000066135	KDM4A
C2	ENSG00000116005	PCYOX1
C2	ENSG00000069020	MAST4
C2	ENSG00000075340	ADD2
C2	ENSG00000136854	STXBP1
C2	ENSG00000121753	BAI2
C2	ENSG00000068615	REEP1
C2	ENSG00000132434	LANCL2
C2	ENSG00000011105	TSPAN9
C2	ENSG00000198216	CACNA1E
C2	ENSG00000175931	UBE2O
C2	ENSG00000160785	SLC25A44
C2	ENSG00000127616	SMARCA4
C2	ENSG00000157064	NMNAT2
C2	ENSG00000105520
C2	ENSG00000154975	CA10
C2	ENSG00000132004	FBXW9
C2	ENSG00000108389	MTMR4
C2	ENSG00000072062	PRKACA
C2	ENSG00000072071	LPHN1
C3	ENSG00000187730	GABRD
C3	ENSG00000109016	DHRS7B
C3	ENSG00000143013	LMO4
C3	ENSG00000158560	DYNC1I1
C3	ENSG00000128245	YWHAH
C3	ENSG00000101474	C20orf3
C3	ENSG00000197586	ENTPD6
C3	ENSG00000114631	PODXL2
C3	ENSG00000115241	PPM1G
C3	ENSG00000105409	ATP1A3
C3	ENSG00000115216	NRBP1
C3	ENSG00000166448	TMEM130
C3	ENSG00000163171	CDC42EP3
C3	ENSG00000243147	MRPL33
C3	ENSG00000105723	GSK3A
C3	ENSG00000158019	BRE
C3	ENSG00000113327	GABRG2
C3	ENSG00000139641	ESYT1
C3	ENSG00000258945
C3	ENSG00000097021	ACOT7
C3	ENSG00000134333	LDHA
C3	ENSG00000158864	NDUFS2
C3	ENSG00000005194	CIAPIN1
C3	ENSG00000168032	ENTPD3
C3	ENSG00000102900	NUP93
C3	ENSG00000110107	PRPF19
C3	ENSG00000238244	GABARAPL3
C3	ENSG00000129159	KCNC1
C3	ENSG00000082397	EPB41L3
C3	ENSG00000168502	CCDC165
C3	ENSG00000123360	PDE1B
C3	ENSG00000135426	KIAA0748
C3	ENSG00000141385	AFG3L2
C3	ENSG00000184368	MAP7D2
C3	ENSG00000167986	DDB1
C3	ENSG00000187624	C17orf97
C3	ENSG00000179409	GEMIN4
C3	ENSG00000167699	GLOD4
C3	ENSG00000053108	FSTL4
C3	ENSG00000110786	PTPN5
C3	ENSG00000213585	VDAC1
C3	ENSG00000174238	PITPNA
C3	ENSG00000085978	ATG16L1
C3	ENSG00000168496	FEN1
C3	ENSG00000144152	FBLN7
C3	ENSG00000113763	UNC5A
C3	ENSG00000159461	AMFR
C3	ENSG00000136842	TMOD1
C3	ENSG00000182934	SRPR
C3	ENSG00000004660	CAMKK1
C3	ENSG00000116221	MRPL37
C3	ENSG00000211445	GPX3
C3	ENSG00000134504	KCTD1
C3	ENSG00000171224	C10orf35
C3	ENSG00000185567	AHNAK2
C3	ENSG00000104722	NEFM
C3	ENSG00000120899	PTK2B
C3	ENSG00000148798	INA
C3	ENSG00000145882	PCYOX1L
C3	ENSG00000183856	IQGAP3
C3	ENSG00000126247	CAPNS1
C3	ENSG00000167778	SPRYD3
C3	ENSG00000220205	VAMP2
C3	ENSG00000023330	ALAS1
C3	ENSG00000089693	MLF2
C3	ENSG00000205084	TMEM231
C3	ENSG00000049656	CLPTM1L
C3	ENSG00000256500
C3	ENSG00000180104	EXOC3
C3	ENSG00000122882	ECD
C3	ENSG00000168000	BSCL2
C3	ENSG00000011083	SLC6A7
C3	ENSG00000146242	TPBG
C3	ENSG00000139970	RTN1
C3	ENSG00000139200	C12orf53
C3	ENSG00000111652	COPS7A
C3	ENSG00000137409	MTCH1
C3	ENSG00000111667	USP5
C3	ENSG00000254462	TMX2-CTNND1
C3	ENSG00000110328	GALNTL4
C3	ENSG00000250151	ARPC4-TTLL3
C3	ENSG00000156711	MAPK13
C3	ENSG00000111669	TPI1
C3	ENSG00000057593	F7
C3	ENSG00000050165	DKK3
C3	ENSG00000111674	ENO2
C3	ENSG00000110955	ATP5B
C3	ENSG00000100150	DEPDC5
C3	ENSG00000136827	TOR1A
C3	ENSG00000137200	FTSJD2
C3	ENSG00000139182	CLSTN3
C3	ENSG00000183020	AP2A2
C3	ENSG00000171574	ZNF584
C3	ENSG00000132589	FLOT2
C3	ENSG00000183155	RABIF
C3	ENSG00000144834	TAGLN3
C3	ENSG00000111218	PRMT8
C3	ENSG00000167642	SPINT2
C3	ENSG00000125841	NRSN2
C3	ENSG00000132694	ARHGEF11
C3	ENSG00000099960	SLC7A4
C3	ENSG00000163618	CADPS
C3	ENSG00000008118	CAMK1G
C3	ENSG00000174684	B3GNT1
C3	ENSG00000101019	UQCC
C3	ENSG00000072958	AP1M1
C3	ENSG00000105197	TIMM50
C3	ENSG00000101365	IDH3B
C3	ENSG00000167770	OTUB1
C3	ENSG00000141002	TCF25
C3	ENSG00000143502	SUSD4
C3	ENSG00000151576	QTRTD1
C3	ENSG00000184886	PIGW
C3	ENSG00000031698	SARS
C3	ENSG00000172020	GAP43
C3	ENSG00000143740	SNAP47
C3	ENSG00000108264	TADA2A
C3	ENSG00000121390	PSPC1
C3	ENSG00000101079	NDRG3
C3	ENSG00000143761	ARF1
C3	ENSG00000204851	PNMAL2
C3	ENSG00000204850
C3	ENSG00000100372	SLC25A17
C3	ENSG00000171603	CLSTN1
C3	ENSG00000148334	PTGES2
C3	ENSG00000142230	SAE1
C3	ENSG00000166189	HPS6
C3	ENSG00000142192	APP
C3	ENSG00000168159	RNF187
C3	ENSG00000188888	GPR179
C3	ENSG00000166619	BLCAP
C3	ENSG00000120254	MTHFD1L
C3	ENSG00000125843	C20orf29
C3	ENSG00000196419	XRCC6
C3	ENSG00000139112	GABARAPL1
C3	ENSG00000125304	TM9SF2
C3	ENSG00000169727	GPS1
C3	ENSG00000124702	KLHDC3
C3	ENSG00000172006	ZNF554
C3	ENSG00000147416	ATP6V1B2
C3	ENSG00000124541	RRP36
C3	ENSG00000198901	PRC1
C3	ENSG00000089199	CHGB
C3	ENSG00000054277	OPN3
C3	ENSG00000160396	HIPK4
C3	ENSG00000184056	VPS33B
C3	ENSG00000113048	MRPS27
C3	ENSG00000102144	PGK1
C3	ENSG00000138107	ACTR1A
C3	ENSG00000166922	SCG5
C3	ENSG00000108344	PSMD3
C3	ENSG00000146072	TNFRSF21
C3	ENSG00000106367	AP1S1
C3	ENSG00000204052	LRRC73
C3	ENSG00000181789	COPG
C3	ENSG00000131779	PEX11B
C3	ENSG00000114948	ADAM23
C3	ENSG00000164933	SLC25A32
C3	ENSG00000067057	PFKP
C3	ENSG00000169032	MAP2K1
C3	ENSG00000124134	KCNS1
C3	ENSG00000183837	PNMA3
C3	ENSG00000236279	CLEC2L
C3	ENSG00000168824
C3	ENSG00000167670	CHAF1A
C3	ENSG00000069849	ATP1B3
C3	ENSG00000144021	CIAO1
C3	ENSG00000173566	NUDT18
C3	ENSG00000053372	MRTO4
C3	ENSG00000135324	MRAP2
C3	ENSG00000075415	SLC25A3
C3	ENSG00000125166	GOT2
C3	ENSG00000115806	GORASP2
C3	ENSG00000157557	ETS2
C3	ENSG00000183654	MARCH11
C3	ENSG00000133606	MKRN1
C3	ENSG00000183527	PSMG1
C3	ENSG00000126950	TMEM35
C3	ENSG00000105402	NAPA
C3	ENSG00000103591	AAGAB
C3	ENSG00000149182	ARFGAP2
C3	ENSG00000088992	TESC
C3	ENSG00000140323	DISP2
C3	ENSG00000134684	YARS
C3	ENSG00000162543	UBXN10
C3	ENSG00000111261	MANSC1
C3	ENSG00000163995	ABLIM2
C3	ENSG00000138834	MAPK8IP3
C3	ENSG00000244038	DDOST
C3	ENSG00000115840	SLC25A12
C3	ENSG00000131473	ACLY
C3	ENSG00000148606	POLR3A
C3	ENSG00000102317	RBM3
C3	ENSG00000104140	RHOV
C3	ENSG00000165716	FAM69B
C3	ENSG00000185274	WBSCR17
C3	ENSG00000158301	GPRASP2
C3	ENSG00000204843	DCTN1
C3	ENSG00000168490	PHYHIP
C3	ENSG00000124688	MAD2L1BP
C3	ENSG00000133169	BEX1
C3	ENSG00000177465	ACOT4
C3	ENSG00000112290	WASF1
C3	ENSG00000159363	ATP13A2
C3	ENSG00000213337	ANKRD39
C3	ENSG00000165280	VCP
C3	ENSG00000176903	PNMA1
C3	ENSG00000154277	UCHL1
C3	ENSG00000179918	SEPHS2
C3	ENSG00000102078	SLC25A14
C3	ENSG00000255994	C14orf162
C3	ENSG00000198218	QRICH1
C3	ENSG00000135372	NAT10
C3	ENSG00000129691	ASH2L
C3	ENSG00000105649	RAB3A
C3	ENSG00000113552	GNPDA1
C3	ENSG00000124785	NRN1
C3	ENSG00000140105	WARS
C3	ENSG00000179222	MAGED1
C3	ENSG00000115073	ACTR1B
C3	ENSG00000137842	TMEM62
C3	ENSG00000112759	SLC29A1
C3	ENSG00000158941	KIAA1967
C3	ENSG00000116885	OSCP1
C3	ENSG00000253200
C3	ENSG00000081760	AACS
C3	ENSG00000179163	FUCA1
C3	ENSG00000147642	SYBU
C3	ENSG00000163875	MEAF6
C3	ENSG00000134287	ARF3
C3	ENSG00000163877	SNIP1
C3	ENSG00000117533	VAMP4
C3	ENSG00000174640	SLCO2A1
C3	ENSG00000151376	ME3
C3	ENSG00000010165	METTL13
C3	ENSG00000014641	MDH1
C3	ENSG00000067225	PKM2
C3	ENSG00000140395	WDR61
C3	ENSG00000151948	GLT1D1
C3	ENSG00000255863
C3	ENSG00000224453
C3	ENSG00000145730	PAM
C3	ENSG00000155876	RRAGA
C3	ENSG00000143420	ENSA
C3	ENSG00000125149	C16orf70
C3	ENSG00000127445	PIN1
C3	ENSG00000124813	RUNX2
C3	ENSG00000197102	DYNC1H1
C3	ENSG00000103423	DNAJA3
C3	ENSG00000173456	RNF26
C3	ENSG00000071553	ATP6AP1
C3	ENSG00000172348	RCAN2
C3	ENSG00000203879	GDI1
C3	ENSG00000164885	CDK5
C3	ENSG00000204564	C6orf136
C3	ENSG00000154096	THY1
C3	ENSG00000004059	ARF5
C3	ENSG00000122574	WIPF3
C3	ENSG00000163481	RNF25
C3	ENSG00000146267	C6orf168
C3	ENSG00000089737	DDX24
C3	ENSG00000102178	UBL4A
C3	ENSG00000159322	ADPGK
C3	ENSG00000106105	GARS
C3	ENSG00000033050	ABCF2
C3	ENSG00000125354	SEPT6
C3	ENSG00000113108	APBB3
C3	ENSG00000104738	MCM4
C3	ENSG00000198925	ATG9A
C3	ENSG00000204394	VARS
C3	ENSG00000178234	GALNT11
C3	ENSG00000169490	TM2D2
C3	ENSG00000164002	DEM1
C3	ENSG00000090316	MAEA
C3	ENSG00000160959	LRRC14
C3	ENSG00000033011	ALG1
C3	ENSG00000171793	CTPS
C3	ENSG00000054356	PTPRN
C3	ENSG00000166741	NNMT
C3	ENSG00000184207	PGP
C3	ENSG00000085377	PREP
C3	ENSG00000120314	WDR55
C3	ENSG00000103222	ABCC1
C3	ENSG00000170445	HARS
C3	ENSG00000167972	ABCA3
C3	ENSG00000135472	FAIM2
C3	ENSG00000010256	UQCRC1
C3	ENSG00000198492	YTHDF2
C3	ENSG00000141098	GFOD2
C3	ENSG00000136026	CKAP4
C3	ENSG00000100934	SEC23A
C3	ENSG00000179151	EDC3
C3	ENSG00000095485	CWF19L1
C3	ENSG00000132305	IMMT
C3	ENSG00000146701	MDH2
C3	ENSG00000161203	AP2M1
C3	ENSG00000151729	SLC25A4
C3	ENSG00000170419	VSTM2A
C3	ENSG00000139719	VPS33A
C3	ENSG00000105220	GPI
C3	ENSG00000078053	AMPH
C3	ENSG00000105568	PPP2R1A
C3	ENSG00000213190	MLLT11
C3	ENSG00000239672	NME1
C3	ENSG00000181610	MRPS23
C3	ENSG00000121083	DYNLL2
C3	ENSG00000179115	FARSA
C3	ENSG00000062716	VMP1
C4	ENSG00000163166	IWS1
C4	ENSG00000177409	SAMD9L
C4	ENSG00000117226	GBP3
C4	ENSG00000173653	RCE1
C4	ENSG00000162664	ZNF326
C4	ENSG00000183833	C3orf15
C4	ENSG00000109047	RCVRN
C4	ENSG00000198160	MIER1
C4	ENSG00000117133	RPF1
C4	ENSG00000170222	C17orf48
C4	ENSG00000055332	EIF2AK2
C4	ENSG00000115816	CEBPZ
C4	ENSG00000150540	HNMT
C4	ENSG00000114013	CD86
C4	ENSG00000111142	METAP2
C4	ENSG00000196981	WDR5B
C4	ENSG00000169087	HSPBAP1
C4	ENSG00000221886	C5orf54
C4	ENSG00000133773	CCDC59
C4	ENSG00000137955	RABGGTB
C4	ENSG00000113328	CCNG1
C4	ENSG00000155438	MKI67IP
C4	ENSG00000162616	DNAJB4
C4	ENSG00000130699	TAF4
C4	ENSG00000123609	NMI
C4	ENSG00000146833	TRIM4
C4	ENSG00000079134	THOC1
C4	ENSG00000135899	SP110
C4	ENSG00000118785	SPP1
C4	ENSG00000046651	OFD1
C4	ENSG00000197299	BLM
C4	ENSG00000132780	NASP
C4	ENSG00000159596	TMEM69
C4	ENSG00000163938	GNL3
C4	ENSG00000139233	LLPH
C4	ENSG00000114423	CBLB
C4	ENSG00000012779	ALOX5
C4	ENSG00000172671	ZFAND4
C4	ENSG00000091073
C4	ENSG00000163975	MFI2
C4	ENSG00000158373	HIST1H2BD
C4	ENSG00000196689	TRPV1
C4	ENSG00000040531	CTNS
C4	ENSG00000186470	BTN3A2
C4	ENSG00000026950	BTN3A1
C4	ENSG00000152700	SAR1B
C4	ENSG00000142327	RNPEPL1
C4	ENSG00000111801	BTN3A3
C4	ENSG00000178623	GPR35
C4	ENSG00000101773	RBBP8
C4	ENSG00000169288	MRPL1
C4	ENSG00000042980	ADAM28
C4	ENSG00000106799	TGFBR1
C4	ENSG00000176222	ZNF404
C4	ENSG00000145348	TBCK
C4	ENSG00000198315	ZNF192
C4	ENSG00000139574	NPFF
C4	ENSG00000197599	CCDC154
C4	ENSG00000249115	HAUS5
C4	ENSG00000121005	CRISPLD1
C4	ENSG00000076685	NT5C2
C4	ENSG00000081237	PTPRC
C4	ENSG00000103091	WDR59
C4	ENSG00000172361	CCDC11
C4	ENSG00000111641	NOP2
C4	ENSG00000167895	TMC8
C4	ENSG00000103126	AXIN1
C4	ENSG00000118197	DDX59
C4	ENSG00000111879	FAM184A
C4	ENSG00000125703	ATG4C
C4	ENSG00000167635	ZNF146
C4	ENSG00000174915	PTDSS2
C4	ENSG00000177119	ANO6
C4	ENSG00000170677	SOCS6
C4	ENSG00000153774	CFDP1
C4	ENSG00000155307	SAMSN1
C4	ENSG00000261717
C4	ENSG00000122884	P4HA1
C4	ENSG00000173366
C4	ENSG00000180917	FTSJD1
C4	ENSG00000138286	FAM149B1
C4	ENSG00000070047	PHRF1
C4	ENSG00000135473	PAN2
C4	ENSG00000089048	ESF1
C4	ENSG00000176731	C8orf59
C4	ENSG00000094914	AAAS
C4	ENSG00000126773	C14orf135
C4	ENSG00000167065	DUSP18
C4	ENSG00000132842	AP3B1
C4	ENSG00000188283	ZNF383
C4	ENSG00000108055	SMC3
C4	ENSG00000095319	NUP188
C4	ENSG00000139835	GRTP1
C4	ENSG00000119638	NEK9
C4	ENSG00000162733	DDR2
C4	ENSG00000177989	ODF3B
C4	ENSG00000219626
C4	ENSG00000141527	CARD14
C4	ENSG00000111581	NUP107
C4	ENSG00000171606	ZNF274
C4	ENSG00000122483	CCDC18
C4	ENSG00000165416	SUGT1
C4	ENSG00000083544	TDRD3
C4	ENSG00000196476	C20orf96
C4	ENSG00000125826	RBCK1
C4	ENSG00000083535	PIBF1
C4	ENSG00000185862	EVI2B
C4	ENSG00000100083	GGA1
C4	ENSG00000237441	RGL2
C4	ENSG00000160255	ITGB2
C4	ENSG00000163563	MNDA
C4	ENSG00000163565	IFI16
C4	ENSG00000203705	TATDN3
C4	ENSG00000067533	RRP15
C4	ENSG00000214078	CPNE1
C4	ENSG00000088451	TGDS
C4	ENSG00000134186	PRPF38B
C4	ENSG00000132635	FAM113A
C4	ENSG00000116266	STXBP3
C4	ENSG00000131051	RBM39
C4	ENSG00000134874	DZIP1
C4	ENSG00000143748	NVL
C4	ENSG00000104936	DMPK
C4	ENSG00000100532	CGRRF1
C4	ENSG00000164944	KIAA1429
C4	ENSG00000178607	ERN1
C4	ENSG00000142583	SLC2A5
C4	ENSG00000173992	CCS
C4	ENSG00000239306	RBM14
C4	ENSG00000132950	ZMYM5
C4	ENSG00000138074	SLC5A6
C4	ENSG00000185955	C7orf61
C4	ENSG00000205531	NAP1L4
C4	ENSG00000165487	EFHA1
C4	ENSG00000124713	GNMT
C4	ENSG00000108296	CWC25
C4	ENSG00000156171	DRAM2
C4	ENSG00000168071	CCDC88B
C4	ENSG00000151846	PABPC3
C4	ENSG00000124181	PLCG1
C4	ENSG00000182263	FIGN
C4	ENSG00000126777	KTN1
C4	ENSG00000105221	AKT2
C4	ENSG00000122033	MTIF3
C4	ENSG00000132963	POMP
C4	ENSG00000107949	BCCIP
C4	ENSG00000203667	FAM36A
C4	ENSG00000153187	HNRNPU
C4	ENSG00000090060	PAPOLA
C4	ENSG00000105289	TJP3
C4	ENSG00000165168	CYBB
C4	ENSG00000089876	DHX32
C4	ENSG00000242247	ARFGAP3
C4	ENSG00000011132	APBA3
C4	ENSG00000130300	PLVAP
C4	ENSG00000171163	ZNF692
C4	ENSG00000187796	CARD9
C4	ENSG00000141086	CTRL
C4	ENSG00000164934	DCAF13
C4	ENSG00000117360	PRPF3
C4	ENSG00000133104	SPG20
C4	ENSG00000184788	SATL1
C4	ENSG00000120832	MTERFD3
C4	ENSG00000145220	LYAR
C4	ENSG00000120699	EXOSC8
C4	ENSG00000102710	FAM48A
C4	ENSG00000174125	TLR1
C4	ENSG00000107672	NSMCE4A
C4	ENSG00000138964	PARVG
C4	ENSG00000186635	ARAP1
C4	ENSG00000138035	PNPT1
C4	ENSG00000165113	GKAP1
C4	ENSG00000101972	STAG2
C4	ENSG00000105865	DUS4L
C4	ENSG00000173391	OLR1
C4	ENSG00000122735	DNAI1
C4	ENSG00000028116	VRK2
C4	ENSG00000115392	FANCL
C4	ENSG00000115970	THADA
C4	ENSG00000204525	HLA-C
C4	ENSG00000140678	ITGAX
C4	ENSG00000162461	SLC25A34
C4	ENSG00000065526	SPEN
C4	ENSG00000155629	PIK3AP1
C4	ENSG00000178149	DALRD3
C4	ENSG00000099954	CECR2
C4	ENSG00000078177	N4BP2
C4	ENSG00000065911	MTHFD2
C4	ENSG00000163510	CWC22
C4	ENSG00000165029	ABCA1
C4	ENSG00000135241	PNPLA8
C4	ENSG00000260007
C4	ENSG00000100911	PSME2
C4	ENSG00000139684	ESD
C4	ENSG00000185222	WBP5
C4	ENSG00000104408	EIF3E
C4	ENSG00000006652	IFRD1
C4	ENSG00000138193	PLCE1
C4	ENSG00000139679	LPAR6
C4	ENSG00000212643	ZRSR1
C4	ENSG00000160191	PDE9A
C4	ENSG00000216490	IFI30
C4	ENSG00000175567	UCP2
C4	ENSG00000096717	SIRT1
C4	ENSG00000128915	NARG2
C4	ENSG00000138161	CUZD1
C4	ENSG00000104412	TTC35
C4	ENSG00000137601	NEK1
C4	ENSG00000122566	HNRNPA2B1
C4	ENSG00000177943	MAMDC4
C4	ENSG00000092531	SNAP23
C4	ENSG00000185947	ZNF267
C4	ENSG00000041982	TNC
C4	ENSG00000140993	TIGD7
C4	ENSG00000077420	APBB1IP
C4	ENSG00000058729	RIOK2
C4	ENSG00000156858	PRR14
C4	ENSG00000160201	U2AF1
C4	ENSG00000189184	PCDH18
C4	ENSG00000074266	EED
C4	ENSG00000096746	HNRNPH3
C4	ENSG00000183977	PP2D1
C4	ENSG00000163755	HPS3
C4	ENSG00000109381	ELF2
C4	ENSG00000133983	COX16
C4	ENSG00000119326	CTNNAL1
C4	ENSG00000119535	CSF3R
C4	ENSG00000159399	HK2
C4	ENSG00000118363	SPCS2
C4	ENSG00000187959	CPSF4L
C4	ENSG00000147874	HAUS6
C4	ENSG00000116062	MSH6
C4	ENSG00000158411	MITD1
C4	ENSG00000171469	ZNF561
C4	ENSG00000165046	LETM2
C4	ENSG00000165502	RPL36AL
C4	ENSG00000184716	SERINC4
C4	ENSG00000018280	SLC11A1
C4	ENSG00000157315	TMED6
C4	ENSG00000104133	SPG11
C4	ENSG00000182700	IGIP
C4	ENSG00000167851	CD300A
C4	ENSG00000111452	GPR133
C4	ENSG00000166710	B2M
C4	ENSG00000198604	BAZ1A
C4	ENSG00000119688	ABCD4
C4	ENSG00000138785	INTS12
C4	ENSG00000165609	NUDT5
C4	ENSG00000082196	C1QTNF3
C4	ENSG00000109445	ZNF330
C4	ENSG00000114416	FXR1
C4	ENSG00000086666	ZFAND6
C4	ENSG00000106344	RBM28
C4	ENSG00000204305	AGER
C4	ENSG00000144381	HSPD1
C4	ENSG00000152580	IGSF10
C4	ENSG00000166002	C11orf75
C4	ENSG00000157379	DHRS1
C4	ENSG00000103995	CEP152
C4	ENSG00000112249	ASCC3
C4	ENSG00000153015	CWC27
C4	ENSG00000155729	KCTD18
C4	ENSG00000171503	ETFDH
C4	ENSG00000198502	HLA-DRB5
C4	ENSG00000197579	TOPORS
C4	ENSG00000090857	PDPR
C4	ENSG00000167968	DNASE1L2
C4	ENSG00000168564	CDKN2AIP
C4	ENSG00000126709	IFI6
C4	ENSG00000138767	CNOT6L
C4	ENSG00000157426	AASDH
C4	ENSG00000158234	FAIM
C4	ENSG00000164011	ZNF691
C4	ENSG00000111832	RWDD1
C4	ENSG00000130349	C6orf203
C4	ENSG00000244617	ASPRV1
C4	ENSG00000164306	CCDC111
C4	ENSG00000196387	ZNF140
C4	ENSG00000132300	PTCD3
C4	ENSG00000120458	C11orf61
C4	ENSG00000196705	ZNF431
C4	ENSG00000087302	C14orf166
C4	ENSG00000188126	MYO15B
C4	ENSG00000021488	SLC7A9
C4	ENSG00000197841	ZNF181
C4	ENSG00000057252	SOAT1
C4	ENSG00000161551	ZNF577
C4	ENSG00000256683	ZNF350
C4	ENSG00000196214	ZNF766
C4	ENSG00000105397	TYK2
C4	ENSG00000170954	ZNF415
C4	ENSG00000143375	CGN
C4	ENSG00000136451	VEZF1
C5	ENSG00000107404	DVL1
C5	ENSG00000173621	LRFN4
C5	ENSG00000106012	IQCE
C5	ENSG00000158089	GALNT14
C5	ENSG00000188095	MESP2
C5	ENSG00000185347	C14orf80
C5	ENSG00000175048	ZDHHC14
C5	ENSG00000182636	NDN
C5	ENSG00000139266	MARCH9
C5	ENSG00000215067
C5	ENSG00000131188	PRR7
C5	ENSG00000139613	SMARCC2
C5	ENSG00000133265	HSPBP1
C5	ENSG00000103319	EEF2K
C5	ENSG00000161277	THAP8
C5	ENSG00000204352	C9orf129
C5	ENSG00000187860	CCDC157
C5	ENSG00000188986	COBRA1
C5	ENSG00000011376	LARS2
C5	ENSG00000099864	PALM
C5	ENSG00000161013	MGAT4B
C5	ENSG00000119574	ZBTB45
C5	ENSG00000071655	MBD3
C5	ENSG00000108840	HDAC5
C5	ENSG00000204899	MZT1
C5	ENSG00000153266	FEZF2
C5	ENSG00000241360	PDXP
C5	ENSG00000011451	WIZ
C5	ENSG00000225663	FAM195B
C5	ENSG00000177519	RPRM
C5	ENSG00000100307	CBX7
C5	ENSG00000197380	DACT3
C5	ENSG00000108292	MLLT6
C5	ENSG00000100122	CRYBB1
C5	ENSG00000169592	INO80E
C5	ENSG00000173991	TCAP
C5	ENSG00000141744	PNMT
C5	ENSG00000130758	MAP3K10
C5	ENSG00000103495	MAZ
C5	ENSG00000196358	NTNG2
C5	ENSG00000185442	FAM174B
C5	ENSG00000100304	TTLL12
C5	ENSG00000159307	SCUBE1
C5	ENSG00000178531	CTXN1
C5	ENSG00000174939	ASPHD1
C5	ENSG00000183114	FAM43B
C5	ENSG00000185519	FAM131C
C5	ENSG00000204377	C1orf134
C5	ENSG00000007080	CCDC124
C5	ENSG00000203618	GP1BB
C5	ENSG00000106636	YKT6
C5	ENSG00000185453	C19orf68
C5	ENSG00000181444	ZNF467
C5	ENSG00000115350	POLE4
C5	ENSG00000100605	ITPK1
C5	ENSG00000198546	ZNF511
C5	ENSG00000013563	DNASE1L1
C5	ENSG00000149243	KLHL35
C5	ENSG00000099364	FBXL19
C5	ENSG00000135925	WNT10A
C5	ENSG00000082014	SMARCD3
C5	ENSG00000160972	PPP1R16A
C5	ENSG00000129187	DCTD
C5	ENSG00000157613	CREB3L1
C5	ENSG00000139722	VPS37B
C5	ENSG00000141858	SAMD1
C6	ENSG00000172830	SSH3
C6	ENSG00000239857	GET4
C6	ENSG00000108591	DRG2
C6	ENSG00000176022	B3GALT6
C6	ENSG00000090581	GNPTG
C6	ENSG00000165644	COMTD1
C6	ENSG00000163472	TMEM79
C6	ENSG00000090097	PCBP4
C6	ENSG00000167508	MVD
C6	ENSG00000134905	CARS2
C6	ENSG00000218891	ZNF579
C6	ENSG00000213015	ZNF580
C6	ENSG00000143303	RRNAD1
C6	ENSG00000100364	KIAA0930
C6	ENSG00000167685	ZNF444
C6	ENSG00000228300	C19orf24
C6	ENSG00000189114	BLOC1S3
C6	ENSG00000174586	ZNF497
C6	ENSG00000099326	MZF1
C6	ENSG00000181588	MEX3D
C6	ENSG00000161010	C5orf45
C6	ENSG00000107816	LZTS2
C6	ENSG00000160113	NR2F6
C6	ENSG00000105298	C19orf29
C6	ENSG00000160360	GPSM1
C6	ENSG00000137221	TJAP1
C6	ENSG00000171161	ZNF672
C6	ENSG00000106397	PLOD3
C6	ENSG00000164972	C9orf24
C6	ENSG00000118162	KPTN
C6	ENSG00000185730	ZNF696
C6	ENSG00000188026	RILPL1
C6	ENSG00000198753	PLXNB3
C6	ENSG00000105519	CAPS
C6	ENSG00000159239	C2orf81
C6	ENSG00000179965	ZNF771
C6	ENSG00000181274	FRAT2
C6	ENSG00000122386	ZNF205
C6	ENSG00000256269	HMBS
C6	ENSG00000184162	NR2C2AP
C6	ENSG00000187954	CYHR1
C6	ENSG00000071859	FAM50A
C6	ENSG00000164897	TMUB1
C6	ENSG00000056558	TRAF1
C6	ENSG00000213563	C8orf82
C6	ENSG00000123933	MXD4
C6	ENSG00000158156	XKR8
C6	ENSG00000104946	TBC1D17
C6	ENSG00000142544	CTU1
C6	ENSG00000198003	CCDC151
-	ENSG00000243943	ZNF512
-	ENSG00000112096	SOD2
-	ENSG00000259164
-	ENSG00000115750	TAF1B
-	ENSG00000168234	TTC39C
-	ENSG00000137393	RNF144B
-	ENSG00000132849	INADL
-	ENSG00000163788	SNRK
-	ENSG00000243660	ZNF487P
-	ENSG00000162434	JAK1
-	ENSG00000164687	FABP5
-	ENSG00000119686
-	ENSG00000104856	RELB
-	ENSG00000136108	CKAP2
-	ENSG00000197930	ERO1L
-	ENSG00000009790	TRAF3IP3
-	ENSG00000186063	AIDA
-	ENSG00000156299	TIAM1
-	ENSG00000132561	MATN2
-	ENSG00000135747	ZNF670
-	ENSG00000162493	PDPN
-	ENSG00000151623	NR3C2
-	ENSG00000234745	HLA-B
-	ENSG00000137494	ANKRD42
-	ENSG00000169375	SIN3A
-	ENSG00000110911	SLC11A2
-	ENSG00000164073	MFSD8
-	ENSG00000077684	PHF17
-	ENSG00000129534	MIS18BP1
-	ENSG00000204634	TBC1D8
-	ENSG00000179542	SLITRK4
-	ENSG00000063601	MTMR1
-	ENSG00000086102	NFX1
-	ENSG00000123983	ACSL3
-	ENSG00000116580	GON4L
