# Supplementary material
Source: publisher figshare collection journal article supplement (https://plos.figshare.com/articles/dataset/_/3973737)
Supplement: Supplementary file 1 [file 1 › S3 Table.PDF]

| Cluster   |           | Function annotation                                                  | Observed | Control | Adjust p-value |
|-----------|-----------|----------------------------------------------------------------------|----------|---------|----------------|
| Cluster 1 | KEGG      | Ribosome                                                             | 37       | 1       | 7.24E-17       |
|           |           | Valine, leucine and isoleucine degradation                           | 7        | 0       | 2.10E-03       |
|           |           | Fatty acid metabolism                                                | 9        | 1       | 2.10E-03       |
|           | GO        | Transcription from RNA polymerase II promoter                        | 41       | 42      | 2.30E-02       |
|           |           | Translation                                                          | 55       | 33      | 2.41E-07       |
|           |           | Gene expression                                                      | 163      | 245     | 2.68E-03       |
|           |           | Positive regulation of transcription from RNA polymerase II promoter | 16       | 10      | 3.78E-02       |
|           |           | Positive regulation of transcription                                 | 27       | 23      | 3.12E-02       |
|           |           | Cellular metabolic process                                           | 279      | 503     | 3.12E-02       |
|           |           | Biosynthetic process                                                 | 194      | 276     | 1.59E-05       |
|           |           | Translational elongation                                             | 39       | 2       | 2.55E-15       |
|           |           | Positive regulation of transcription, DNA-dependent                  | 22       | 15      | 2.21E-02       |
|           |           | Response to lipopolysaccharide                                       | 6        | 0       | 3.12E-02       |
|           |           | Negative regulation of biosynthetic process                          | 28       | 25      | 3.18E-02       |
|           |           | Cellular biosynthetic process                                        | 194      | 270     | 5.65E-06       |
|           |           | Positive regulation of gene expression                               | 27       | 24      | 3.20E-02       |
|           |           | Positive regulation of cellular biosynthetic process                 | 32       | 31      | 3.19E-02       |
|           |           | Carboxylic acid catabolic process                                    | 13       | 7       | 4.84E-02       |
|           |           | Macromolecule biosynthetic process                                   | 160      | 214     | 1.92E-05       |
|           | Structure | White matter                                                         | 65       | 31      | 5.17E-32       |
|           | Cell type | Astrocytes                                                           | 149      | 67      | 9.86E-23       |
| Cluster 2 | KEGG      | Calcium signaling pathway                                            | 16       | 7       | 2.11E-05       |
|           |           | Dilated cardiomyopathy                                               | 7        | 1       | 1.51E-03       |
|           |           | Long-term potentiation                                               | 7        | 5       | 4.33E-02       |
|           | GO        | Homophilic cell adhesion                                             | 16       | 4       | 1.26E-04       |
|           |           | Cell adhesion                                                        | 38       | 59      | 1.91E-02       |
|           |           | Calcium ion transport                                                | 18       | 10      | 4.69E-04       |
|           |           | Protein polymerization                                               | 8        | 1       | 2.92E-03       |
|           |           | Synaptic transmission                                                | 25       | 19      | 4.04E-04       |
|           |           | Transport                                                            | 117      | 238     | 3.75E-03       |
|           |           | Cell-cell signaling                                                  | 32       | 31      | 4.04E-04       |
|           |           | Nervous system development                                           | 50       | 80      | 7.14E-03       |
|           |           | Cell-cell adhesion                                                   | 21       | 14      | 4.69E-04       |
|           |           | Actin filament polymerization                                        | 7        | 1       | 6.71E-03       |
|           |           | Cell communication                                                   | 123      | 267     | 1.47E-02       |
|           |           | Metal ion transport                                                  | 36       | 33      | 1.61E-04       |
|           |           | Ion transport                                                        | 46       | 57      | 4.04E-04       |
|           |           | Potassium ion transport                                              | 14       | 12      | 2.00E-02       |
|           |           | Regulation of actin cytoskeleton organization                        | 7        | 1       | 6.71E-03       |
|           |           | Cation transport                                                     | 39       | 41      | 3.51E-04       |

|              |           |                                                                       |     |     |          |
|--------------|-----------|-----------------------------------------------------------------------|-----|-----|----------|
| Cluster<br>3 |           | Sodium ion transport                                                  | 13  | 7   | 3.75E-03 |
|              |           | Regulation of synaptic transmission                                   | 9   | 4   | 1.47E-02 |
|              |           | Monovalent inorganic cation transport                                 | 24  | 23  | 2.92E-03 |
|              |           | Transmission of nerve impulse                                         | 27  | 22  | 4.04E-04 |
|              |           | Actin filament organization                                           | 9   | 5   | 2.65E-02 |
|              |           | Sphingolipid metabolic process                                        | 6   | 2   | 4.70E-02 |
|              |           | Cellular protein complex assembly                                     | 15  | 12  | 1.11E-02 |
|              |           | Actin polymerization or depolymerization                              | 8   | 1   | 2.92E-03 |
|              |           | Biological adhesion                                                   | 38  | 59  | 1.91E-02 |
|              |           | Membrane lipid metabolic process                                      | 6   | 2   | 4.70E-02 |
|              |           | Establishment of localization                                         | 117 | 238 | 3.75E-03 |
|              |           | Di-, tri-valent inorganic cation transport                            | 19  | 15  | 2.99E-03 |
|              | Structure | Grey matter                                                           | 136 | 96  | 3.95E-27 |
|              | Cell type | Pnoc+ Neurons                                                         | 32  | 65  | 2.01E-05 |
|              |           | Layer 5b Neurons                                                      | 27  | 29  | 2.20E-08 |
|              | KEGG      | Huntington's disease                                                  | 8   | 12  | 3.50E-02 |
|              |           | Aminoacyl-tRNA biosynthesis                                           | 7   | 3   | 1.85E-03 |
|              |           | Parkinson's disease                                                   | 6   | 1   | 1.60E-03 |
|              |           | Glycolysis / Gluconeogenesis                                          | 7   | 5   | 5.61E-03 |
| Cluster<br>3 | GO        | Vesicle-mediated transport                                            | 30  | 49  | 6.21E-04 |
|              |           | Transport                                                             | 86  | 269 | 4.56E-03 |
|              |           | Cellular macromolecule catabolic process                              | 24  | 54  | 3.53E-02 |
|              |           | Glucose metabolic process                                             | 12  | 9   | 1.85E-03 |
|              |           | Aerobic respiration                                                   | 6   | 1   | 4.56E-03 |
|              |           | Glycolysis                                                            | 11  | 4   | 3.55E-04 |
|              |           | Generation of precursor metabolites and energy                        | 24  | 29  | 3.55E-04 |
|              |           | Cellular respiration                                                  | 9   | 7   | 9.04E-03 |
|              |           | Intracellular transport                                               | 32  | 83  | 4.16E-02 |
|              |           | Membrane organization                                                 | 18  | 26  | 4.69E-03 |
|              |           | Catabolic process                                                     | 46  | 122 | 9.04E-03 |
|              |           | Dicarboxylic acid metabolic process                                   | 6   | 2   | 9.33E-03 |
|              |           | Alcohol catabolic process                                             | 12  | 8   | 1.13E-03 |
|              |           | Establishment of localization in cell                                 | 39  | 100 | 1.33E-02 |
|              |           | Glucose catabolic process                                             | 11  | 6   | 1.13E-03 |
|              |           | Hexose metabolic process                                              | 13  | 14  | 4.97E-03 |
|              |           | Monosaccharide metabolic process                                      | 14  | 17  | 6.07E-03 |
|              |           | Establishment of localization                                         | 86  | 269 | 4.56E-03 |
|              | Structure | Grey matter                                                           | 73  | 159 | 5.18E-12 |
|              | Cell type | Pnoc+ Neurons                                                         | 23  | 74  | 7.30E-03 |
|              |           | Layer 5b Neurons                                                      | 25  | 31  | 2.10E-08 |
|              |           | Layer 5a Neurons                                                      | 14  | 18  | 7.16E-05 |
| Cluster<br>4 | GO        | RNA splicing                                                          | 13  | 20  | 3.31E-02 |
|              |           | Immune response                                                       | 19  | 37  | 2.84E-02 |
|              |           | mRNA processing                                                       | 16  | 23  | 1.88E-02 |
|              |           | Nucleobase, nucleoside, nucleotide and nucleic acid metabolic process | 91  | 331 | 2.84E-02 |
|              |           | Defense response                                                      | 19  | 37  | 2.84E-02 |

|              |           |                                                                       |    |     |          |
|--------------|-----------|-----------------------------------------------------------------------|----|-----|----------|
| Cluster<br>5 | GO        | mRNA metabolic process                                                | 20 | 24  | 1.01E-03 |
|              |           | RNA metabolic process                                                 | 59 | 198 | 4.60E-02 |
|              |           | RNA processing                                                        | 24 | 48  | 1.88E-02 |
|              |           | Nitrogen compound metabolic process                                   | 95 | 362 | 4.80E-02 |
|              |           | Positive regulation of immune system process                          | 9  | 11  | 4.60E-02 |
|              |           | Regulation of T cell activation                                       | 6  | 4   | 4.60E-02 |
|              |           | Immune system process                                                 | 26 | 60  | 2.84E-02 |
|              | Structure | White matter                                                          | 25 | 71  | 7.95E-13 |
|              |           | Regulation of transcription                                           | 17 | 226 | 1.50E-02 |
|              |           | Transcription                                                         | 17 | 243 | 2.06E-02 |
|              |           | Nucleobase, nucleoside, nucleotide and nucleic acid metabolic process | 21 | 401 | 4.80E-02 |
|              |           | Biosynthetic process                                                  | 23 | 447 | 4.14E-02 |
|              |           | Regulation of gene expression                                         | 17 | 256 | 2.36E-02 |
|              |           | Regulation of metabolic process                                       | 19 | 317 | 3.17E-02 |
|              |           | Negative regulation of biosynthetic process                           | 6  | 47  | 3.37E-02 |
|              |           | Cellular biosynthetic process                                         | 23 | 441 | 3.87E-02 |
|              |           | Regulation of cellular metabolic process                              | 19 | 295 | 2.06E-02 |
|              |           | Regulation of nitrogen compound metabolic process                     | 18 | 242 | 1.50E-02 |
|              |           | Macromolecule biosynthetic process                                    | 20 | 354 | 3.52E-02 |
| Cluster<br>6 | Structure | Grey matter                                                           | 9  | 223 | 4.23E-02 |
|              | Cell type | CCK-expressing neurons                                                | 8  | 33  | 8.04E-04 |
|              | GO        | Regulation of cellular process                                        | 25 | 610 | 1.55E-02 |
|              | Cell type | Oligodendrocytes                                                      | 8  | 39  | 9.73E-06 |
