# Supplementary material
Source: publisher figshare collection journal article supplement (https://plos.figshare.com/articles/dataset/_/3973737)
Supplement: Supplementary file 1 [file 1 › S4 Data.XLSX]

## Sheet: Data for Fig. 2D
Cluster ID	Oberved_number	Expected number	SD*
C1	9	13.582	3.72655
C2	20	10.725	3.13292
C3	1	7.147	2.60849
C4	0	6.887	2.49368
C5	3	1.548	1.22442
C6	1	1.08	0.993271
*SD: standard deviation based on 1,000 permutations

## Sheet: Data for Fig. 3C
Cluster ID	Oberved_number	Expected number	SD*
C1	35	50.239	6.51647
C2	106	39.956	5.73594
C3	35	27.111	5.03389
C4	20	25.78	4.71846
C5	8	5.925	2.30058
C6	4	4.45	1.98177
*SD: standard deviation based on 1,000 permutations

## Sheet: Data for Fig. 4A
Cluster ID	Oberved_number (enriched TF)	Expected number (enriched TF)	SD* (enriched TF)	Oberved_number (correlated TF)	Expected number (correlated TF)	SD (correlated TF)
C1	5	4.38353	4.35319	0	1.268	1.58956
C2	18	3.9739	3.85195	4	0.654	1.05137
C3	6	3.64558	3.62957	0	0.488	1.00243
C4	1	3.82631	3.94879	5	1.171	1.6372
C5	6	2.70181	3.4189	1	0.124	0.385711
C6	0	2.58133	3.31714	0	0.097	0.381755
*SD: standard deviation based on 1,000 permutations
