# Supplementary material
Source: publisher figshare collection journal article supplement (https://plos.figshare.com/articles/dataset/_/3973737)

|                       |                    |                       |                      |                     |                     |        |
|-----------------------|--------------------|-----------------------|----------------------|---------------------|---------------------|--------|
| 0 (0%)<br>1.0e+00     | 425 (94%)<br>0e+00 | 158 (51%)<br>1.8e-129 | 0 (0%)<br>1.0e+00    | 6 (9%)<br>1.6e-01   | 0 (0%)<br>1.0e+00   | C_log1 |
| 52 (18%)<br>1.0e-17   | 0 (0%)<br>1e+00    | 0 (0%)<br>1.0e+00     | 218 (75%)<br>0.0e+00 | 1 (2%)<br>9.2e-01   | 7 (14%)<br>3.2e-04  | C_log2 |
| 215 (77%)<br>7.3e-244 | 0 (0%)<br>1e+00    | 0 (0%)<br>1.0e+00     | 62 (22%)<br>6.3e-43  | 0 (0%)<br>1.0e+00   | 4 (8%)<br>4.4e-02   | C_log3 |
| 152 (78%)<br>5.4e-171 | 0 (0%)<br>1e+00    | 0 (0%)<br>1.0e+00     | 0 (0%)<br>1.0e+00    | 20 (30%)<br>1.9e-20 | 22 (44%)<br>2.0e-26 | C_log4 |
| 0 (0%)<br>1.0e+00     | 25 (14%)<br>2e-08  | 148 (83%)<br>1.2e-222 | 2 (1%)<br>1.0e+00    | 2 (3%)<br>3.4e-01   | 0 (0%)<br>1.0e+00   | C_log5 |
| 150 (90%)<br>4.1e-189 | 0 (0%)<br>1e+00    | 0 (0%)<br>1.0e+00     | 2 (1%)<br>1.0e+00    | 12 (18%)<br>1.2e-10 | 2 (4%)<br>2.0e-01   | C_log6 |
| 0 (0%)<br>1.0e+00     | 1 (2%)<br>1e+00    | 0 (0%)<br>1.0e+00     | 0 (0%)<br>1.0e+00    | 25 (61%)<br>3.9e-48 | 15 (37%)<br>2.0e-26 | C_log7 |
| C1                    | C2                 | C3                    | C4                   | C5                  | C6                  |        |

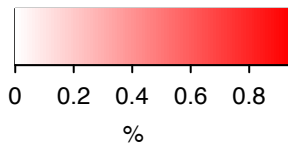

Supplement: Supplementary file 1 [file 1 › S4 Fig.PDF]
