# Supplementary material
Source: publisher figshare collection journal article supplement (https://plos.figshare.com/articles/dataset/_/3973737)
Supplement: Supplementary file 1 [file 1 › S4 Table.PDF]

| Sample ID | ADI-R domain scores* |                     |                     | Sum | Groups**   |
|-----------|----------------------|---------------------|---------------------|-----|------------|
|           | Social interaction   | Stereotyped pattern | Development evident |     |            |
| 6640      | 30                   | 12                  | 5                   | 47  | high 1     |
| 6677      | 26                   | 12                  | 5                   | 43  | high 2     |
| 6184      | 28                   | 9                   | 5                   | 42  | high 2     |
| 6337      | 28                   | 6                   | 5                   | 39  | high 2     |
| 5144h     | 27                   | 6                   | 4                   | 37  | moderate 1 |
| 4721      | 24                   | 10                  | 3                   | 37  | moderate 1 |
| 7090      | 26                   | 4                   | 5                   | 35  | moderate 1 |
| 7002      | 24                   | 7                   | 4                   | 35  | moderate 1 |
| 5144      | 28                   | 3                   | 3                   | 34  | moderate 1 |
| 4671      | 26                   | 3                   | 5                   | 34  | moderate 1 |
| 4899      | 22                   | 8                   | 4                   | 34  | moderate 1 |
| 4925      | 24                   | 4                   | 5                   | 33  | moderate 1 |
| 5569      | 22                   | 6                   | 5                   | 33  | moderate 1 |
| 1174      | 22                   | 6                   | 5                   | 33  | moderate 1 |
| 1638      | 21                   | 7                   | 5                   | 33  | moderate 1 |
| 7078      | 22                   | 4                   | 5                   | 31  | moderate 2 |
| 6994      | 22                   | 5                   | 3                   | 30  | moderate 2 |
| 5342      | 22                   | 3                   | 5                   | 30  | moderate 2 |
| 5173      | 22                   | 2                   | 5                   | 29  | moderate 2 |
| 6401      | 20                   | 4                   | 5                   | 29  | moderate 2 |
| 5666      | 19                   | 4                   | 2                   | 25  | low        |
| 6399      | 14                   | 6                   | 5                   | 25  | low        |

\*ADI-R domain scores: Autism Diagnostic Interview Communication score.

\*\*Autistic individuals were grouped by the sum of the ADI-R domain scores.
