# Supplementary material
Source: publisher figshare collection journal article supplement (https://plos.figshare.com/articles/dataset/_/3973737)
Supplement: Supplementary file 1 [file 1 › S5 Data.TXT]

Cluster_ID	Correlated_TF	Targets_Ensembl_ID	Targets_HGNC_ID
C2	EGR1-4	ENSG00000183873	SCN5A
C2	EGR1-4	ENSG00000112941	PAPD7
C2	EGR1-4	ENSG00000165526	RPUSD4
C2	EGR1-4	ENSG00000134775	FHOD3
C2	EGR1-4	ENSG00000156395	SORCS3
C2	EGR1-4	ENSG00000107758	PPP3CB
C2	EGR1-4	ENSG00000125851	PCSK2
C2	EGR1-4	ENSG00000163399	ATP1A1
C2	EGR1-4	ENSG00000063015	SEZ6
C2	EGR1-4	ENSG00000084731	KIF3C
C2	EGR1-4	ENSG00000131242	RAB11FIP4
C2	EGR1-4	ENSG00000197283	SYNGAP1
C2	EGR1-4	ENSG00000100321	SYNGR1
C2	EGR1-4	ENSG00000169258	GPRIN1
C2	EGR1-4	ENSG00000181754	AMIGO1
C2	EGR1-4	ENSG00000177614	PGBD5
C2	EGR1-4	ENSG00000161082	CELF5
C2	EGR1-4	ENSG00000171385	KCND3
C2	EGR1-4	ENSG00000131504	DIAPH1
C2	EGR1-4	ENSG00000118160	SLC8A2
C2	EGR1-4	ENSG00000166949	SMAD3
C2	EGR1-4	ENSG00000055813	CCDC85A
C2	EGR1-4	ENSG00000156453	PCDH1
C2	EGR1-4	ENSG00000102003	SYP
C2	EGR1-4	ENSG00000137216	TMEM63B
C2	EGR1-4	ENSG00000149428	HYOU1
C2	EGR1-4	ENSG00000110514	MADD
C2	EGR1-4	ENSG00000185737	NRG3
C2	EGR1-4	ENSG00000172375	C2CD2L
C2	EGR1-4	ENSG00000124313	IQSEC2
C2	EGR1-4	ENSG00000130558	OLFM1
C2	EGR1-4	ENSG00000174437	ATP2A2
C2	EGR1-4	ENSG00000128594	LRRC4
C2	EGR1-4	ENSG00000156642	NPTN
C2	EGR1-4	ENSG00000144567	FAM134A
C2	EGR1-4	ENSG00000084070	SMAP2
C2	EGR1-4	ENSG00000121671	CRY2
C2	EGR1-4	ENSG00000176095	IP6K1
C2	EGR1-4	ENSG00000149269	PAK1
C2	EGR1-4	ENSG00000121753	BAI2
C2	EGR1-4	ENSG00000175931	UBE2O
C2	EGR1-4	ENSG00000072062	PRKACA
C2	EGR1-4	ENSG00000072071	LPHN1
C5	TEAD2	ENSG00000173621	LRFN4
C5	TEAD2	ENSG00000158089	GALNT14
C5	TEAD2	ENSG00000185347	C14orf80
C5	TEAD2	ENSG00000175048	ZDHHC14
C5	TEAD2	ENSG00000131188	PRR7
C5	TEAD2	ENSG00000139613	SMARCC2
C5	TEAD2	ENSG00000161277	THAP8
C5	TEAD2	ENSG00000187860	CCDC157
C5	TEAD2	ENSG00000099864	PALM
C5	TEAD2	ENSG00000161013	MGAT4B
C5	TEAD2	ENSG00000071655	MBD3
C5	TEAD2	ENSG00000108840	HDAC5
C5	TEAD2	ENSG00000153266	FEZF2
C5	TEAD2	ENSG00000011451	WIZ
C5	TEAD2	ENSG00000100307	CBX7
C5	TEAD2	ENSG00000197380	DACT3
C5	TEAD2	ENSG00000108292	MLLT6
C5	TEAD2	ENSG00000130758	MAP3K10
C5	TEAD2	ENSG00000185442	FAM174B
C5	TEAD2	ENSG00000178531	CTXN1
C5	TEAD2	ENSG00000174939	ASPHD1
C5	TEAD2	ENSG00000115350	POLE4
C5	TEAD2	ENSG00000099364	FBXL19
C5	TEAD2	ENSG00000157613	CREB3L1
C5	TEAD2	ENSG00000141858	SAMD1
