# Supplementary material
Source: publisher figshare collection journal article supplement (https://plos.figshare.com/articles/dataset/_/3973737)
Supplement: Supplementary file 1 [file 1 › S5 Table.PDF]

|      | Function annotation                       | Observed | Control | Adjust p-value |
|------|-------------------------------------------|----------|---------|----------------|
| KEGG | Calcium signaling pathway                 | 6        | 113     | 1.29E-03       |
|      | MAPK signaling pathway                    | 7        | 200     | 2.34E-03       |
|      | Homophilic cell adhesion                  | 6        | 87      | 3.25E-03       |
|      | Calcium ion transport                     | 9        | 148     | 9.88E-04       |
|      | Synaptic transmission                     | 9        | 282     | 9.94E-03       |
|      | Cell-cell signaling                       | 10       | 433     | 3.89E-02       |
|      | Protein amino acid dephosphorylation      | 6        | 110     | 6.47E-03       |
|      | Dephosphorylation                         | 7        | 144     | 4.83E-03       |
|      | Cell communication                        | 39       | 2864    | 1.35E-02       |
|      | Metal ion transport                       | 14       | 441     | 1.39E-03       |
|      | Ion transport                             | 16       | 645     | 3.25E-03       |
|      | Cation transport                          | 14       | 507     | 3.25E-03       |
|      | Sodium ion transport                      | 6        | 98      | 4.63E-03       |
|      | Transmission of nerve impulse             | 10       | 326     | 7.64E-03       |
|      | Cellular homeostasis                      | 9        | 320     | 1.96E-02       |
|      | Regulation of cell communication          | 15       | 756     | 2.13E-02       |
| GO   | Di-, trivalent inorganic cation transport | 9        | 177     | 1.39E-03       |
