# Supplementary material
Source: publisher figshare collection journal article supplement (https://plos.figshare.com/articles/dataset/_/3973737)
Supplement: Supplementary file 1 [file 1 › S6 Table.PDF]

| Targets      | EGR member | Number* | Source          | Cell lines | GEO Number              | Reference                |
|--------------|------------|---------|-----------------|------------|-------------------------|--------------------------|
| predict      | EGR1-4     | 852     | Match algorithm | -          | -                       | -                        |
| egr1_Ecc1    | EGR1       | 3237    | ChIP-Seq        | ECC-1      | GSM1010888              | Pope et al, 2014, Nature |
| egr1_Hct116  | EGR1       | 2658    | ChIP-Seq        | HCT-116    | GSM1010846              | Pope et al, 2014, Nature |
| egr1_Mcf7    | EGR1       | 3034    | ChIP-Seq        | MCF-7      | GSM1010844              | Pope et al, 2014, Nature |
| egr1_Gm12878 | EGR1       | 6373    | ChIP-Seq        | GM12878    | GSM803434               | Pope et al, 2014, Nature |
| egr1_H1hesc  | EGR1       | 3783    | ChIP-Seq        | H1-hESC    | GSM803430               | Pope et al, 2014, Nature |
| egr1_K562    | EGR1       | 8298    | ChIP-Seq        | K562       | GSM803414               | Pope et al, 2014, Nature |
| egr2_MAK     | EGR2       | 4970    | ChIP-Seq        | MAC#       | GSM785503,<br>GSM785504 | Pham et al, 2012, Blood  |
| egr1_LoVo    | EGR1       | 3511    | ChIP-Seq        | LoVo       | GSM1208608              | Yan et al, 2013, Cell    |

\*: Only target genes detected as expressed in our human brain data are shown.

#: Monocyte-derived macrophage
