# Supplementary material
Source: publisher figshare collection journal article supplement (https://plos.figshare.com/articles/dataset/_/3973737)

|                   |                   |                   |                |                 |                |               |
|-------------------|-------------------|-------------------|----------------|-----------------|----------------|---------------|
| 5 (1%) (1.0e+00)  | 35 (8%) (3.1e-05) | 19 (6%) (4.9e-02) | 3 (1%) (1e+00) | 0 (0%) (1e+00)  | 1 (2%) (1e+00) | <b>Layer2</b> |
| 0 (0%) (1.0e+00)  | 3 (9%) (3.1e-01)  | 3 (9%) (1.2e-01)  | 0 (0%) (1e+00) | 0 (0%) (1e+00)  | 0 (0%) (1e+00) | <b>Layer3</b> |
| 2 (1%) (1.0e+00)  | 2 (1%) (1.0e+00)  | 3 (2%) (8.6e-01)  | 0 (0%) (1e+00) | 1 (2%) (1e+00)  | 0 (0%) (1e+00) | <b>Layer4</b> |
| 1 (2%) (1.0e+00)  | 2 (5%) (7.3e-01)  | 1 (2%) (8.6e-01)  | 0 (0%) (1e+00) | 4 (10%) (3e-04) | 0 (0%) (1e+00) | <b>Layer5</b> |
| 16 (7%) (3.3e-01) | 1 (0%) (1.0e+00)  | 0 (0%) (1.0e+00)  | 1 (0%) (1e+00) | 1 (2%) (1e+00)  | 0 (0%) (1e+00) | <b>Layer6</b> |
| $\bar{c}$         | $\bar{c}$         | $\bar{c}$         | $\bar{c}$      | $\bar{c}$       | $\bar{c}$      |               |

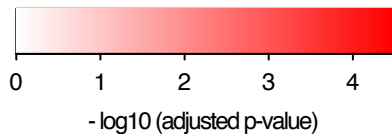

Supplement: Supplementary file 1 [file 1 › S14 Fig.PDF]
