# Supplementary material
Source: publisher figshare collection journal article supplement (https://plos.figshare.com/articles/dataset/_/3973737)

**C1**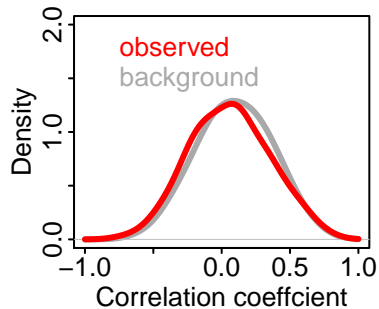**C2**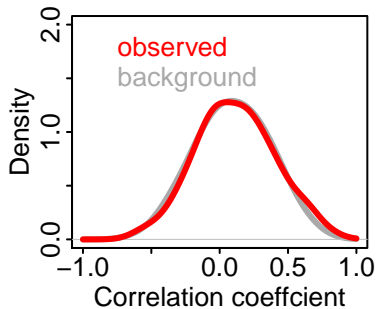**C3\*\*\***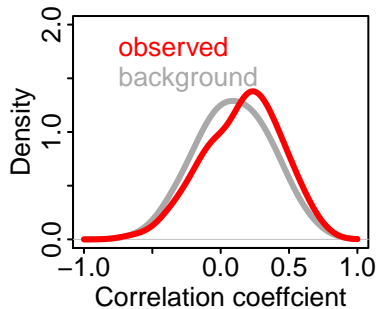**C4**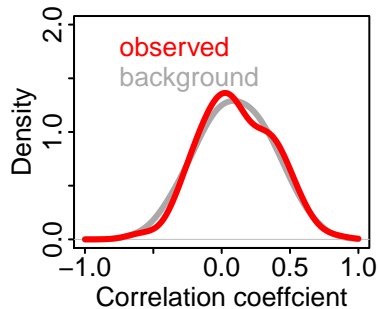**C5\*\***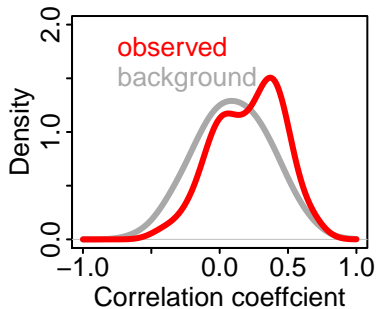**C6**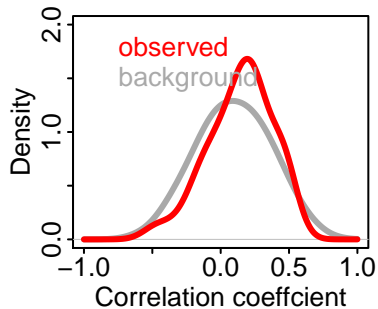

Supplement: Supplementary file [file 1]
