# Supplementary material
Source: publisher figshare collection journal article supplement (https://plos.figshare.com/articles/dataset/_/3973737)

**C\_log1:599**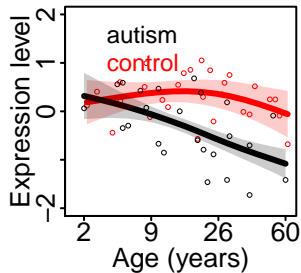**C\_log2:289**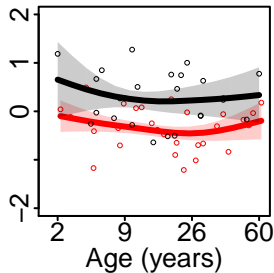**C\_log3:281**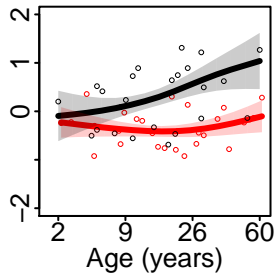**C\_log4:195**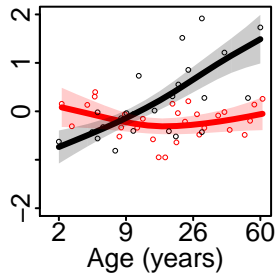**C\_log5:178**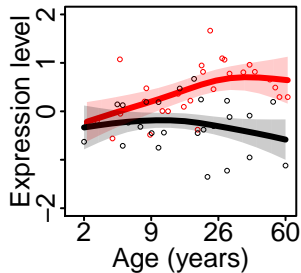**C\_log6:166**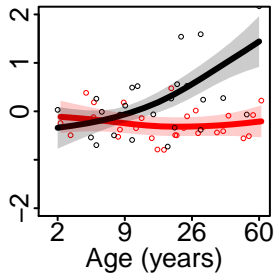**C\_log7:41**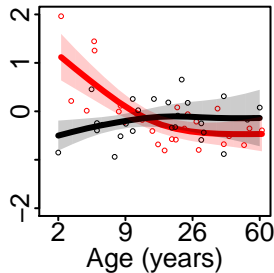

Supplement: Supplementary file [file 1]
