# Supplementary material
Source: publisher figshare collection journal article supplement (https://plos.figshare.com/articles/dataset/_/3973737)

**A** SFARI genes

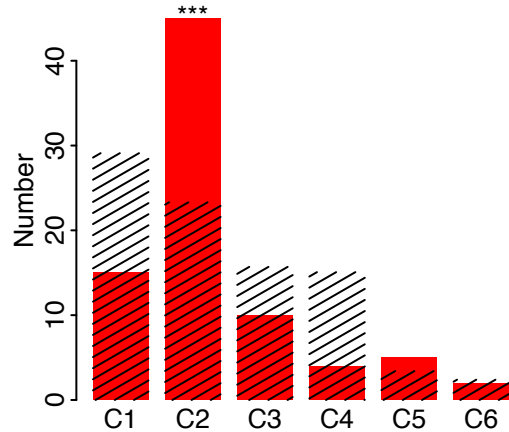

**B** AutismKB genes

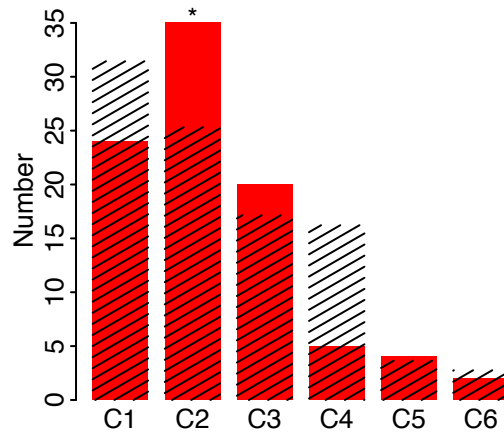

**C** Genes with *de novo* mutations in autism

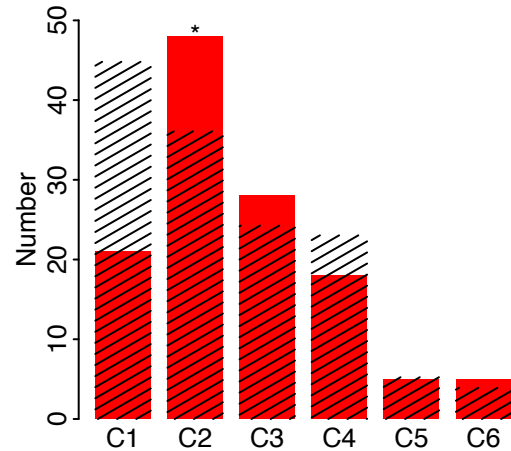

Supplement: Supplementary file [file 1]
