# Supplementary material
Source: publisher figshare collection journal article supplement (https://plos.figshare.com/articles/dataset/_/3973737)

**A****SFARI genes**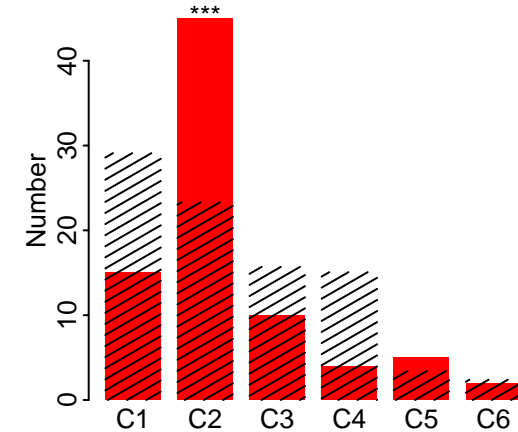**B****SFARI scored genes**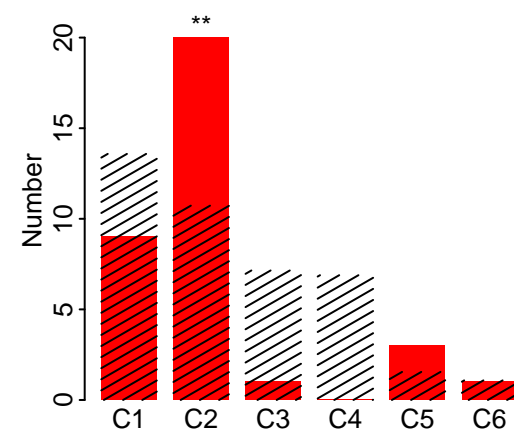**C****AutismKB genes**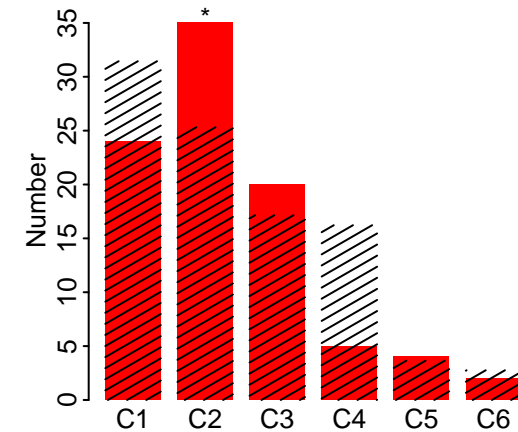**D****Genes with de novo mutations in autism**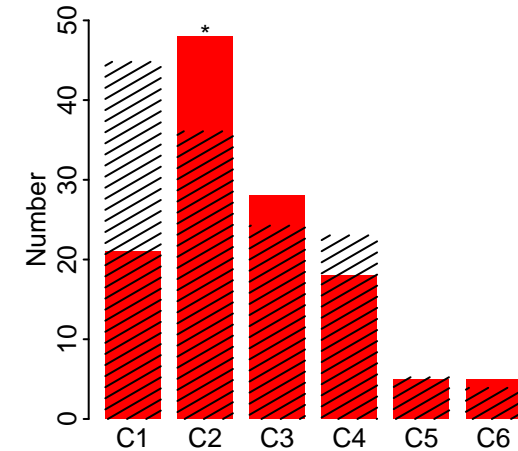

Supplement: Supplementary file [file 1]
