# Supplementary material
Source: publisher figshare collection journal article supplement (https://plos.figshare.com/articles/dataset/_/3973737)

**A****All**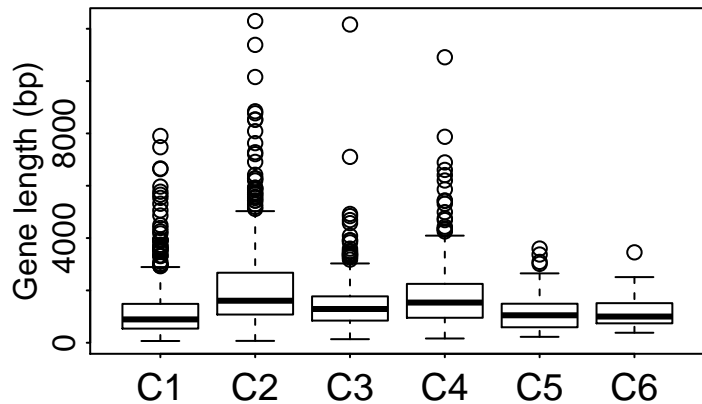**B****Subsamples**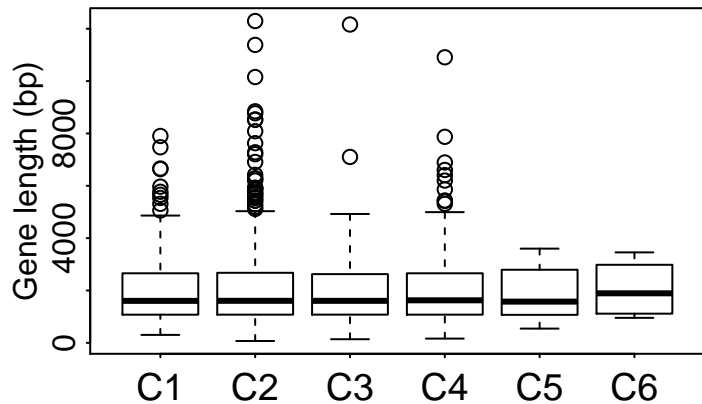

Supplement: Supplementary file [file 1]
