# Supplementary material
Source: publisher figshare collection journal article supplement (https://plos.figshare.com/articles/dataset/_/3973737)

**RNAseq (synapse-related genes)**

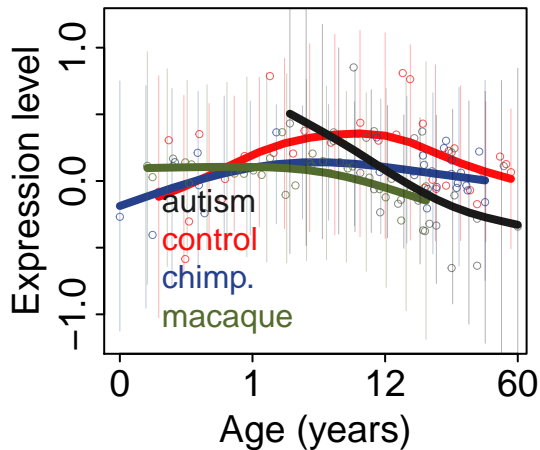

**Array (synapse-related genes)**

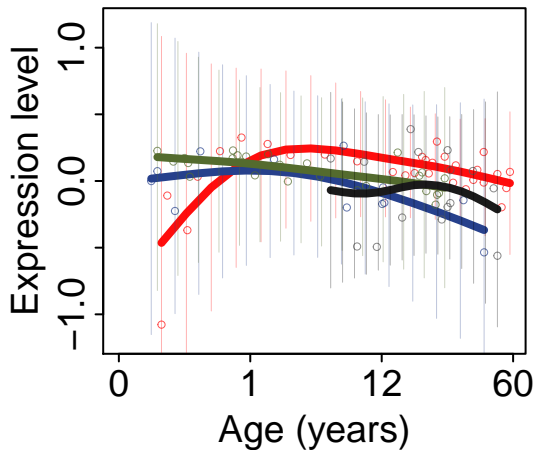

Supplement: Supplementary file [file 1]
