# Supplementary material
Source: publisher figshare collection journal article supplement (https://plos.figshare.com/articles/dataset/_/3973737)

**C1:569**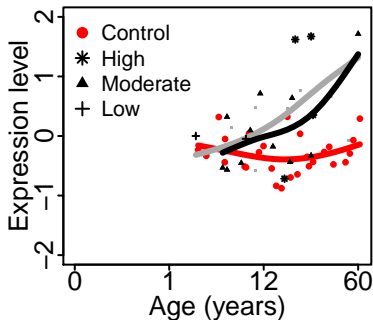**C2:454**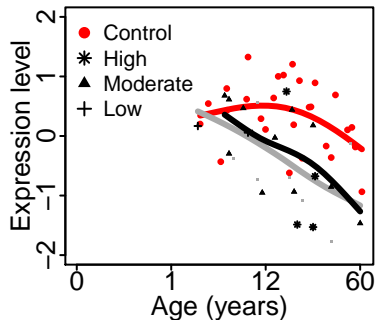**C3:308**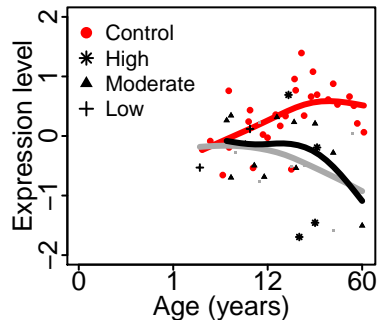**C4:293**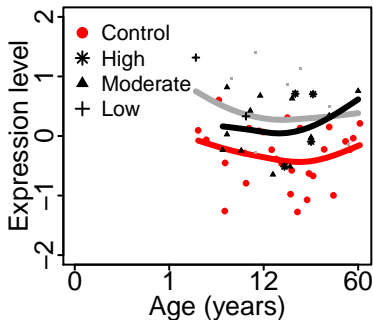**C5:66**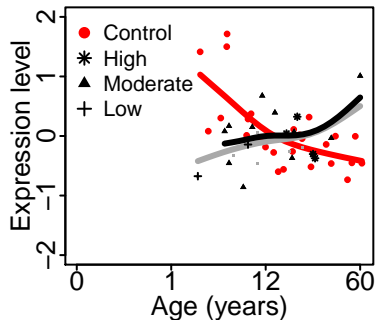**C6:50**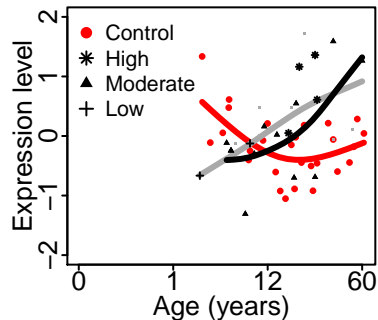

Supplement: Supplementary file [file 1]
