# Supplementary material
Source: publisher figshare collection journal article supplement (https://plos.figshare.com/articles/dataset/_/3973737)
Supplement: Supplementary file [file 1]

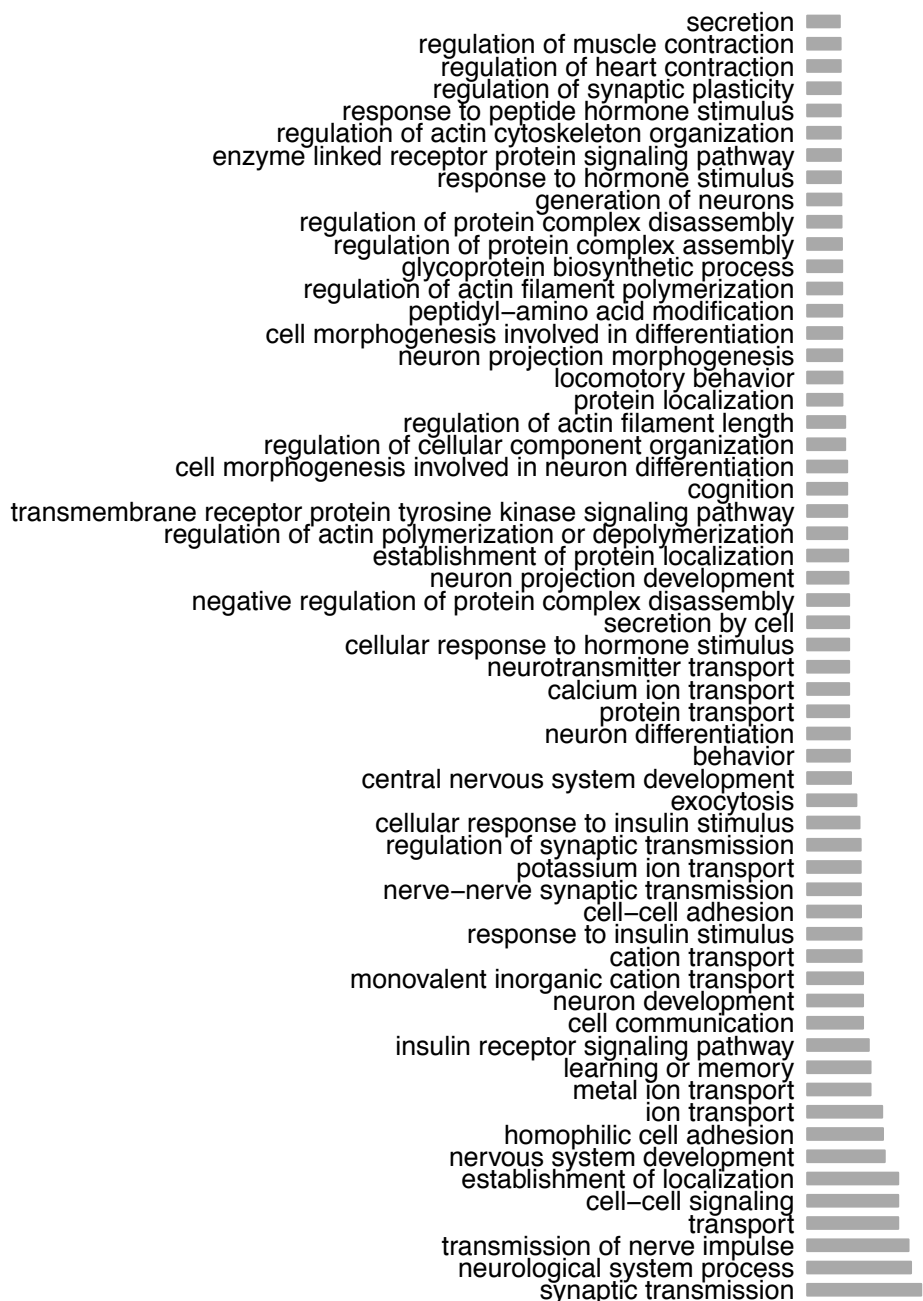

0 2 4

$-\log_{10}(\text{Adjusted P-values})$
