# Supplementary material
Source: publisher figshare collection journal article supplement (https://plos.figshare.com/articles/dataset/_/3973737)

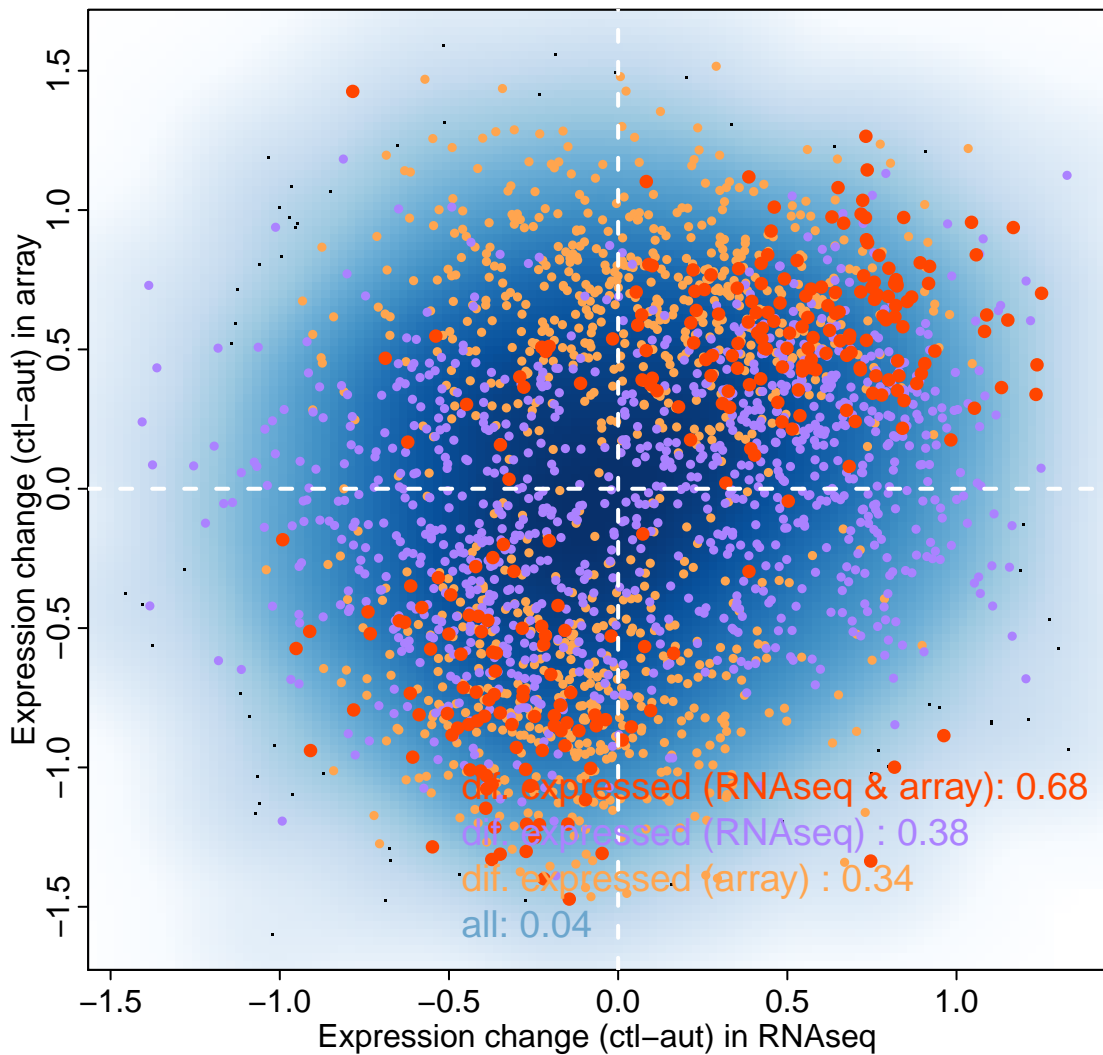

Supplement: Supplementary file 1 [file 1 › S1 Fig.PDF]

**A**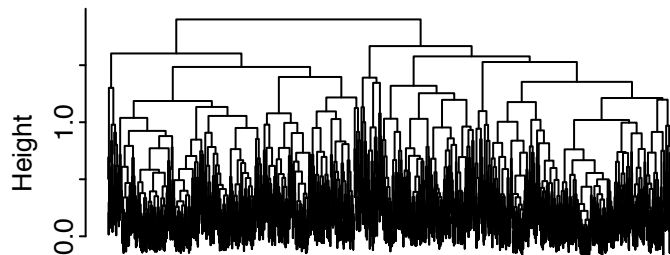**B**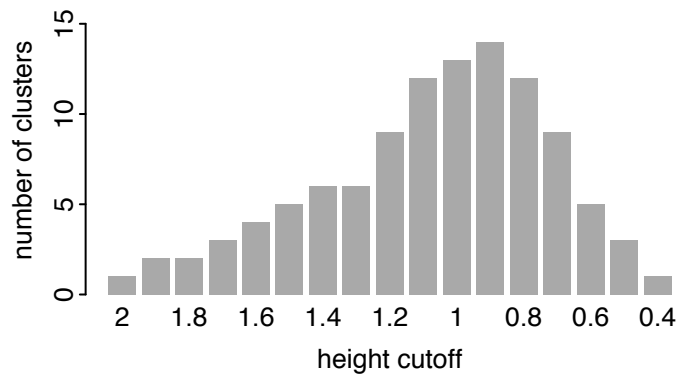**C**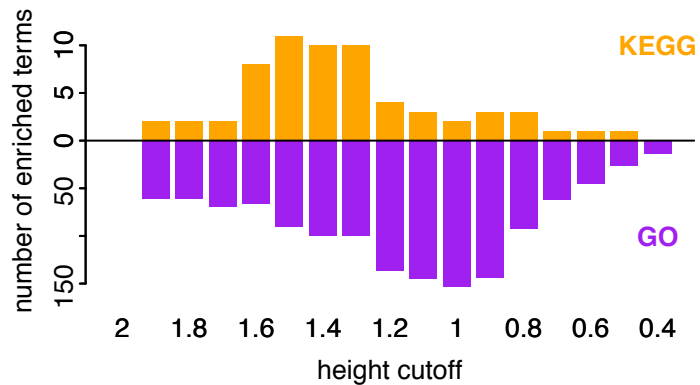**D**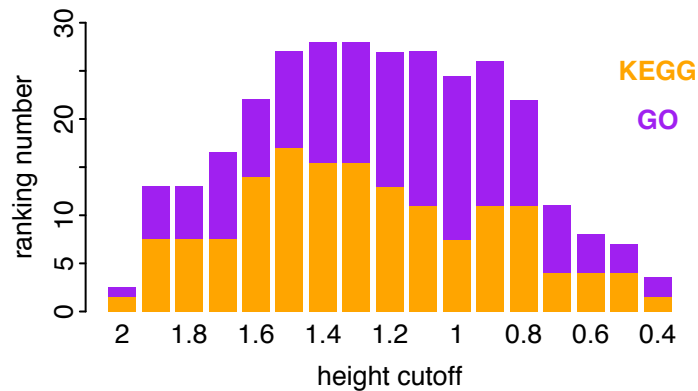

Supplement: Supplementary file 1 [file 1 › S2 Fig.PDF]

**C\_log1:599**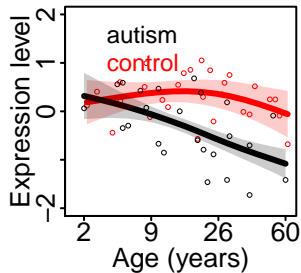**C\_log2:289**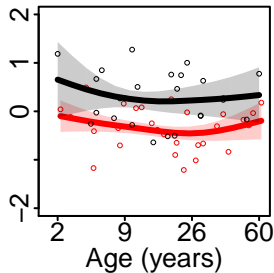**C\_log3:281**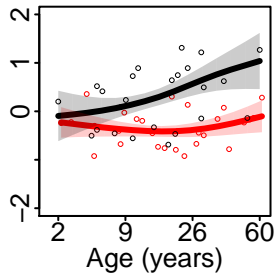**C\_log4:195**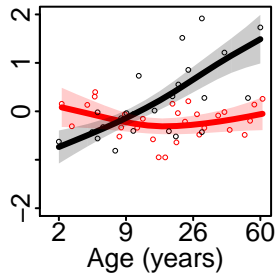**C\_log5:178**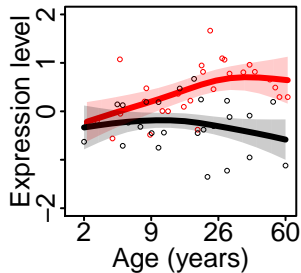**C\_log6:166**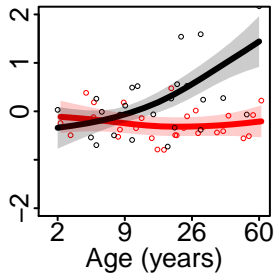**C\_log7:41**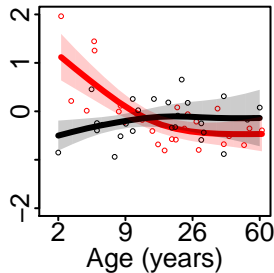

Supplement: Supplementary file 1 [file 1 › S3 Fig.PDF]

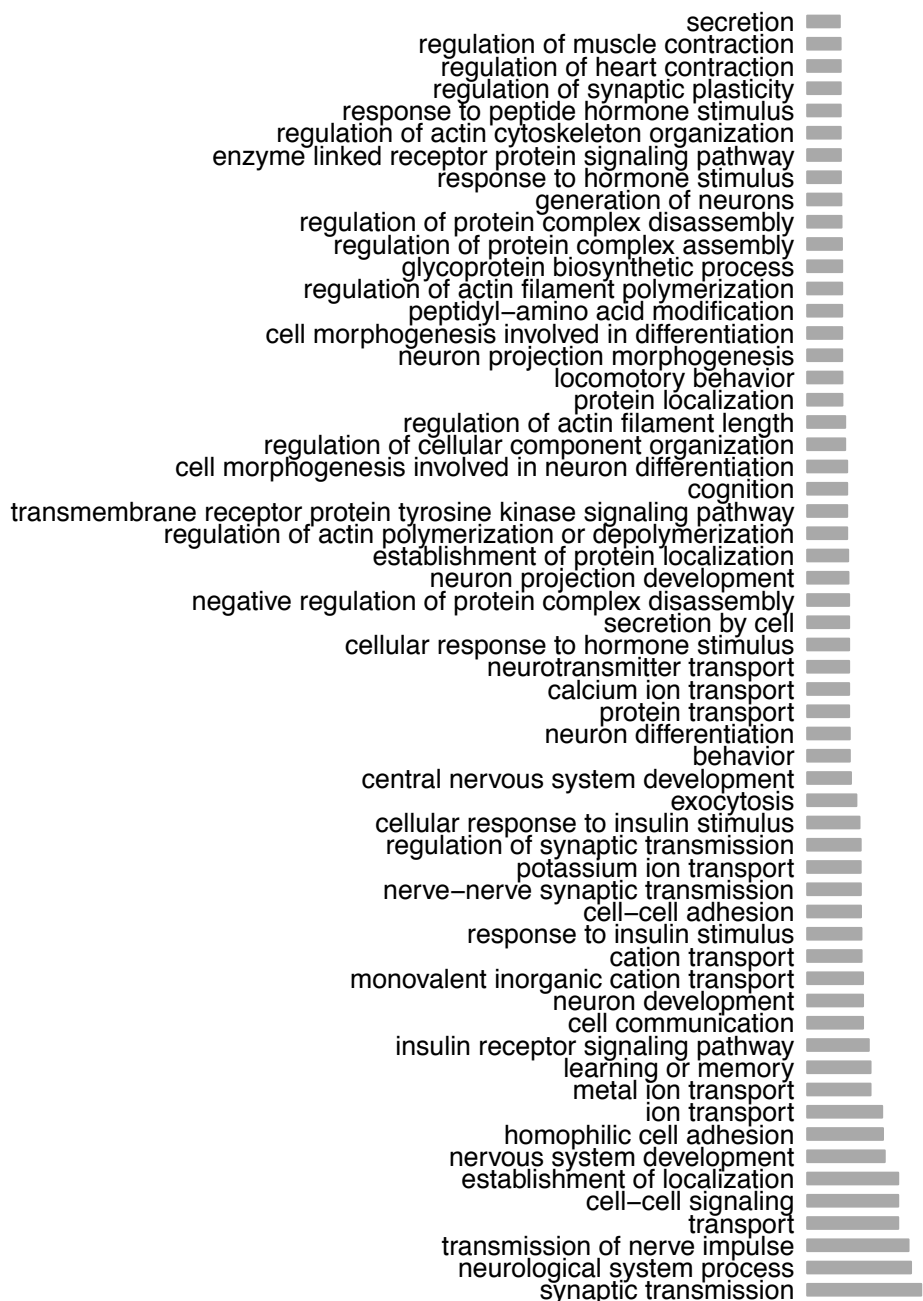

0 2 4

$-\log_{10}(\text{Adjusted P-values})$

Supplement: Supplementary file 1 [file 1 › S6 Fig.PDF]

**C1:569**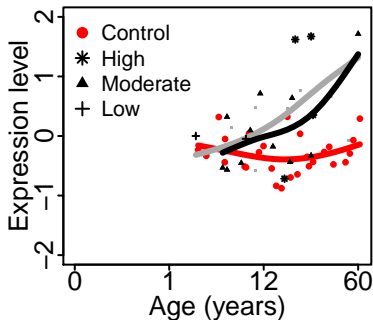**C2:454**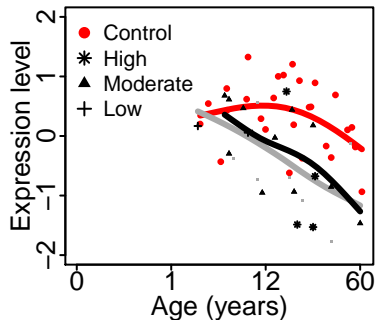**C3:308**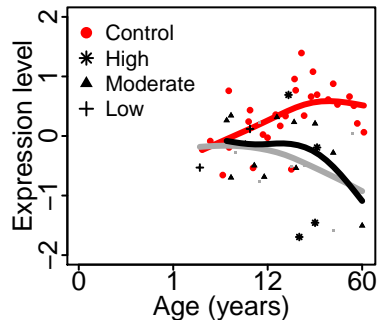**C4:293**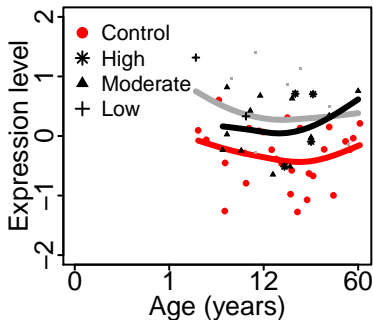**C5:66**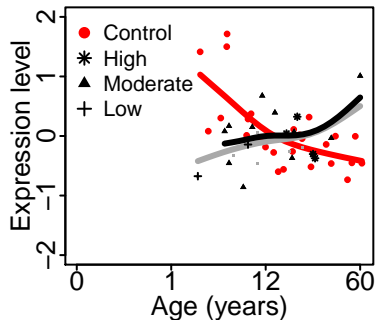**C6:50**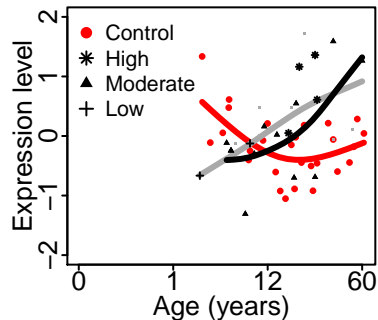

Supplement: Supplementary file 1 [file 1 › S7 Fig.PDF]

**A** SFARI genes

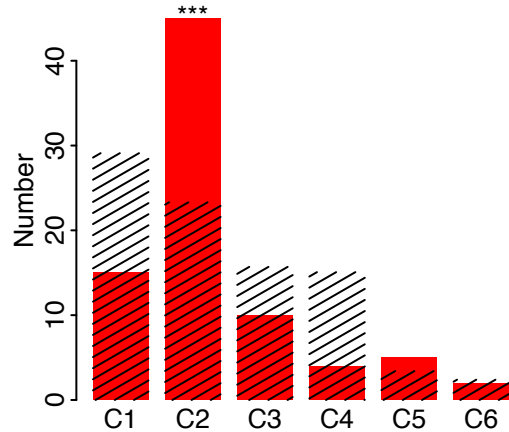

**B** AutismKB genes

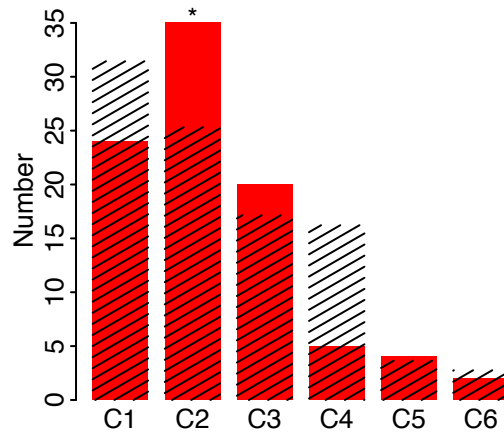

**C** Genes with *de novo* mutations in autism

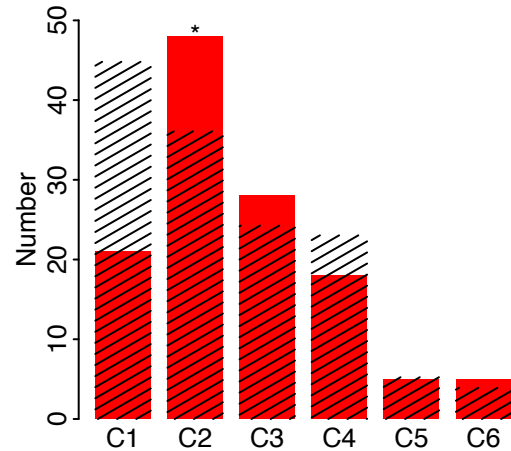

Supplement: Supplementary file 1 [file 1 › S8 Fig.PDF]

**A****All**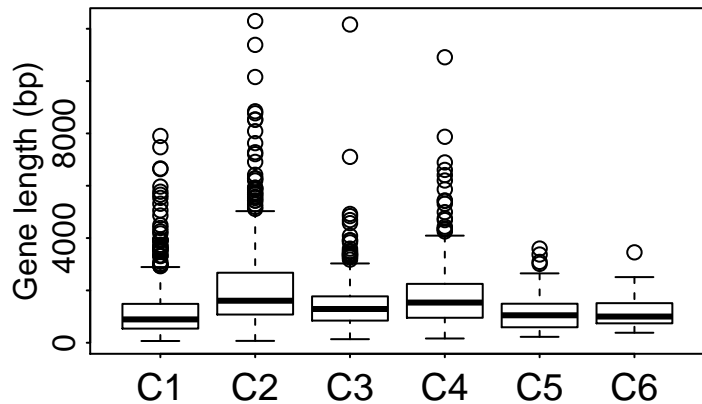**B****Subsamples**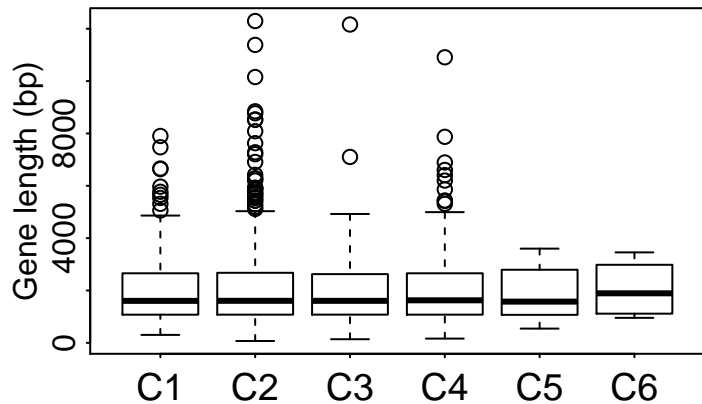

Supplement: Supplementary file 1 [file 1 › S9 Fig.PDF]

**A****SFARI genes**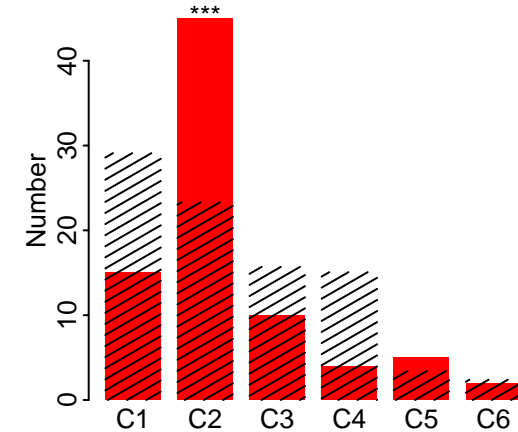**B****SFARI scored genes**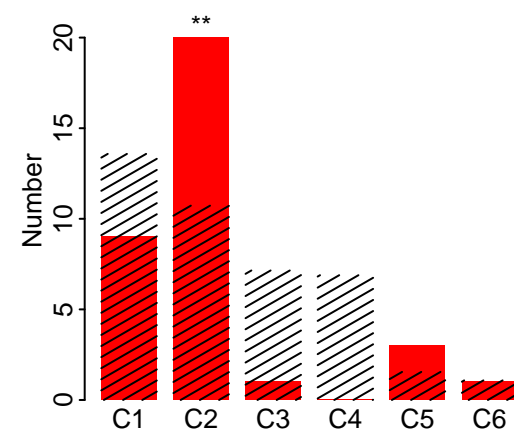**C****AutismKB genes**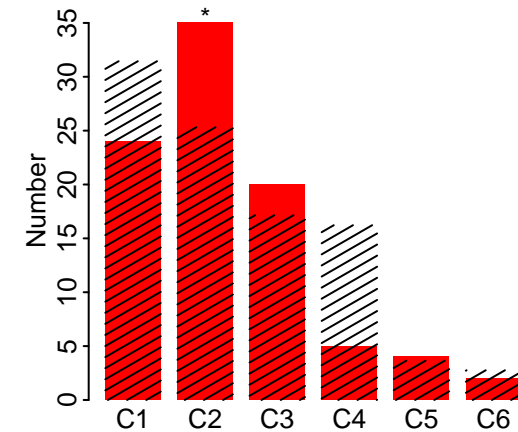**D****Genes with de novo mutations in autism**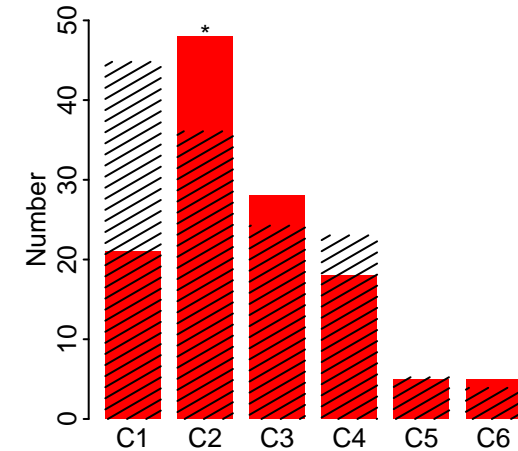

Supplement: Supplementary file 1 [file 1 › S10 Fig.PDF]

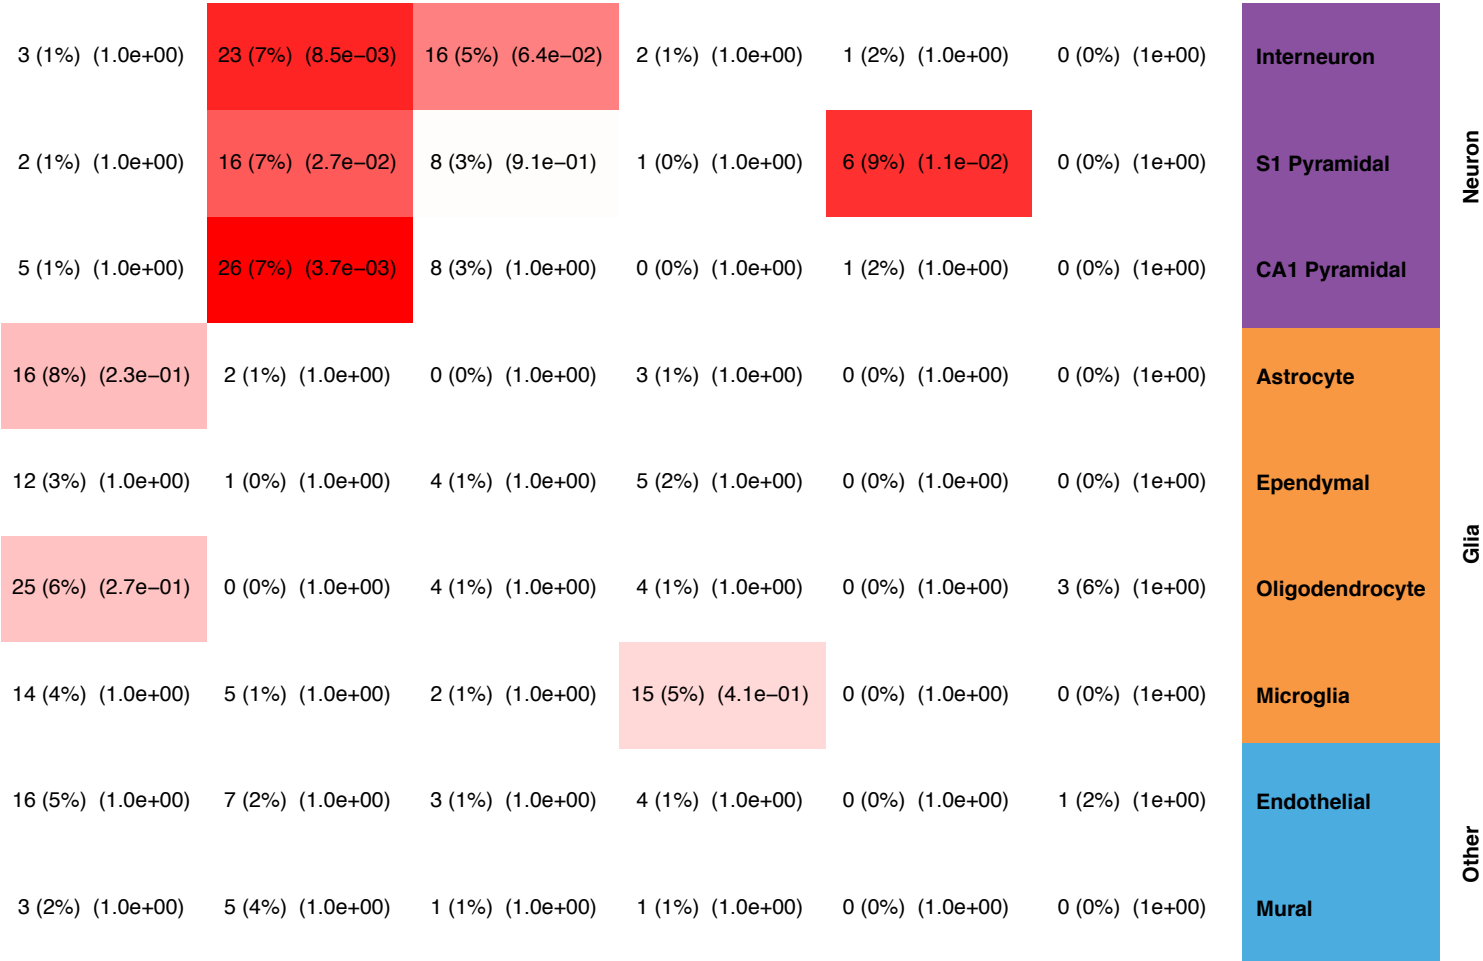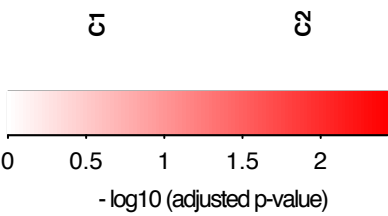

Supplement: Supplementary file 1 [file 1 › S11 Fig.PDF]

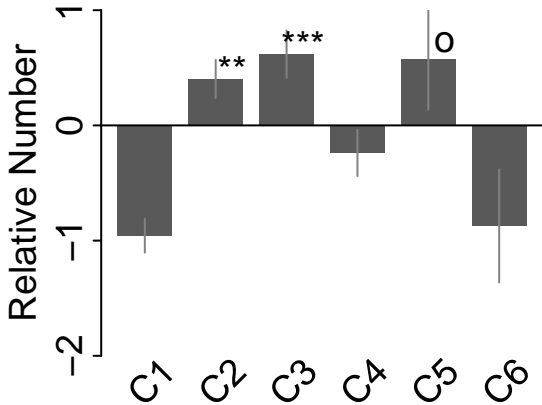

Supplement: Supplementary file 1 [file 1 › S12 Fig.PDF]

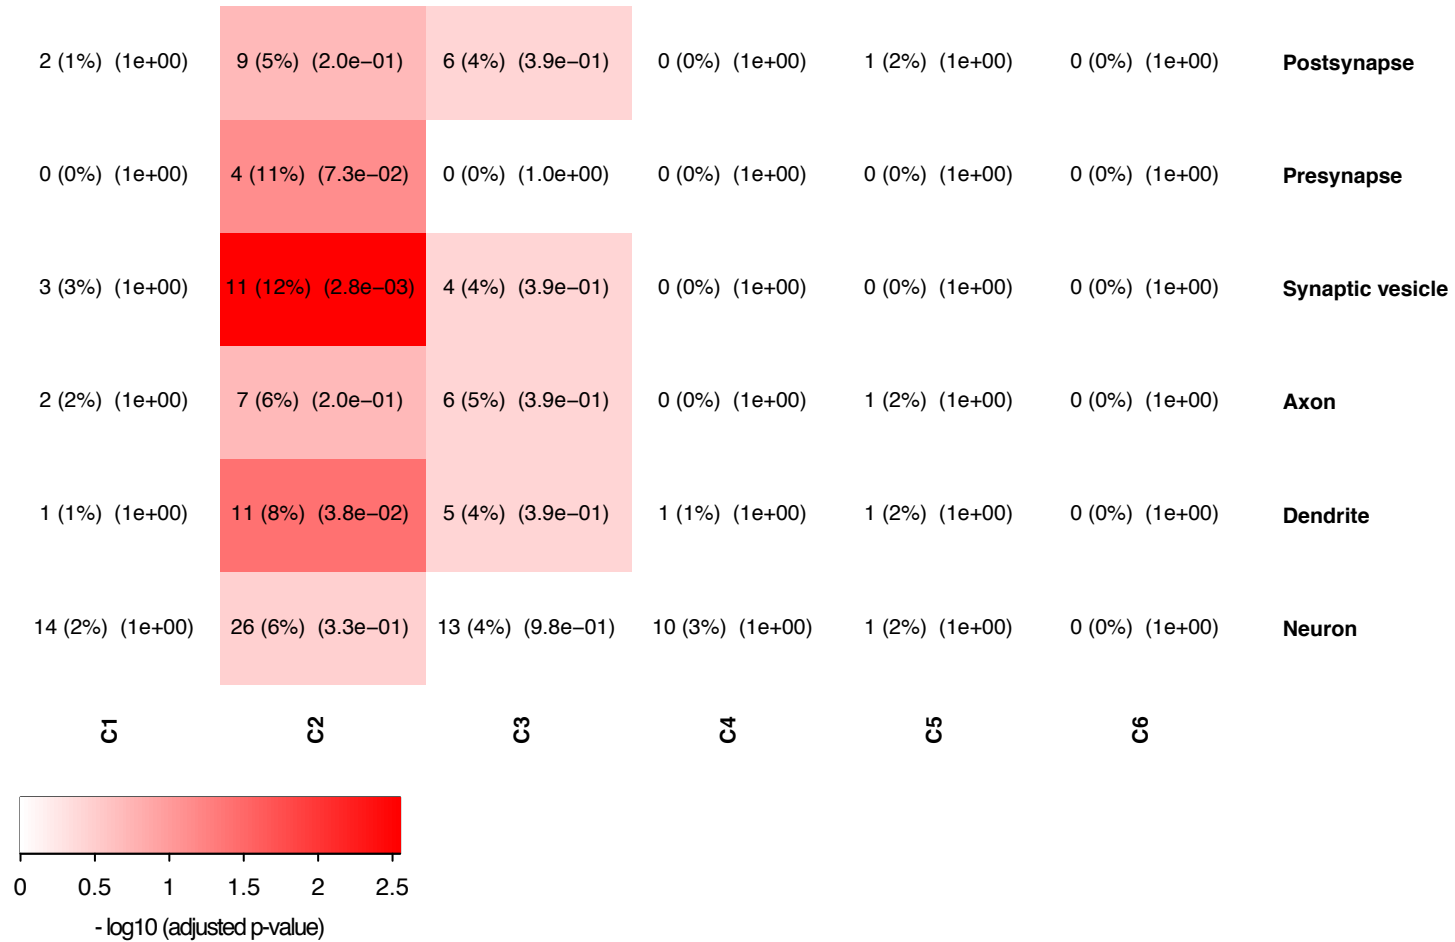

Supplement: Supplementary file 1 [file 1 › S13 Fig.PDF]

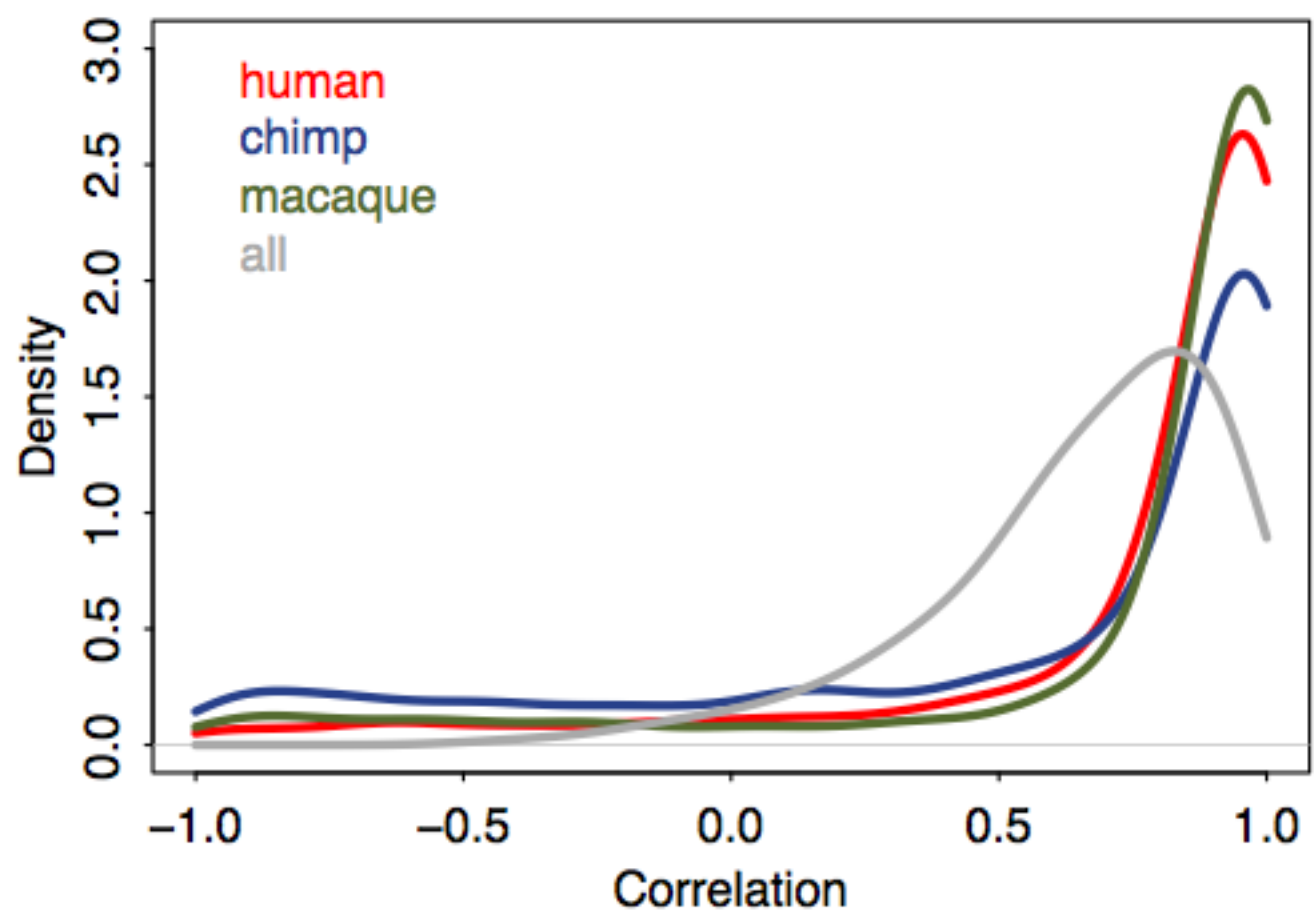

Supplement: Supplementary file 1 [file 1 › S15 Fig.PDF]

## SYP

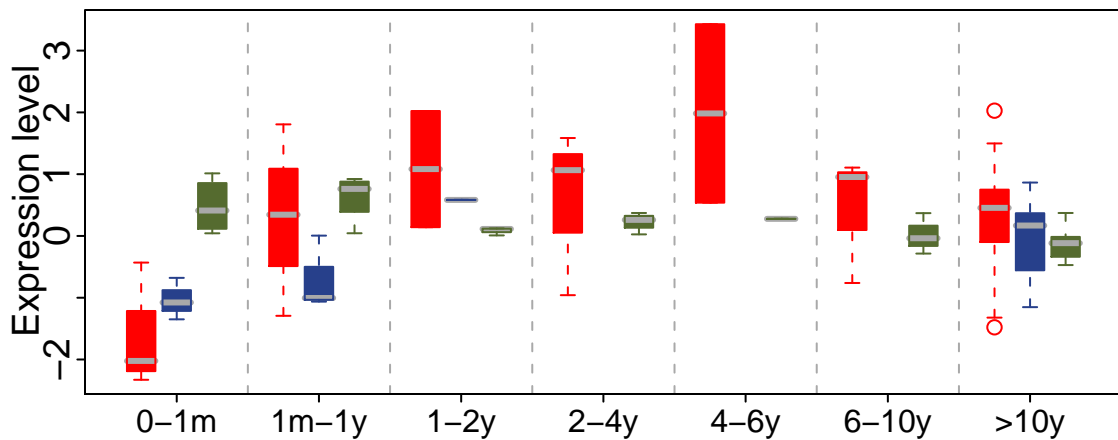

## DLG4

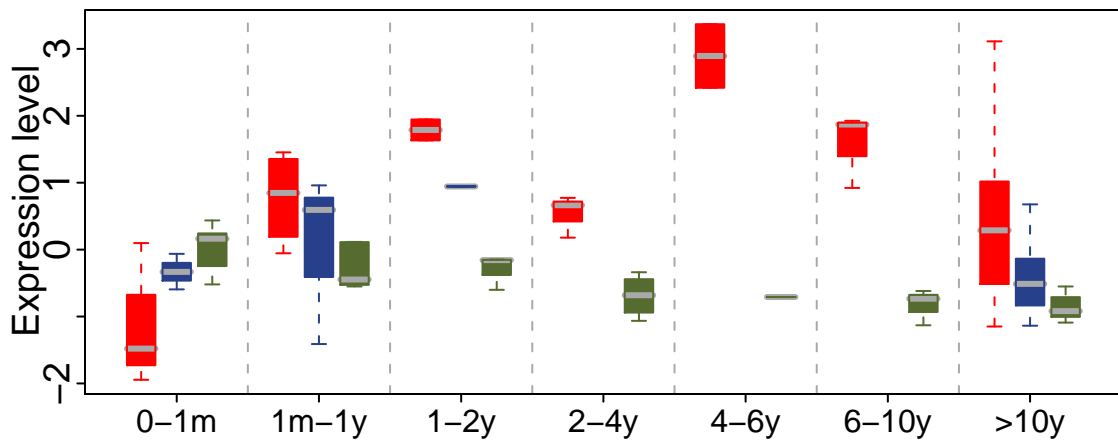

Supplement: Supplementary file 1 [file 1 › S16 Fig.PDF]

**RNAseq (synapse-related genes)**

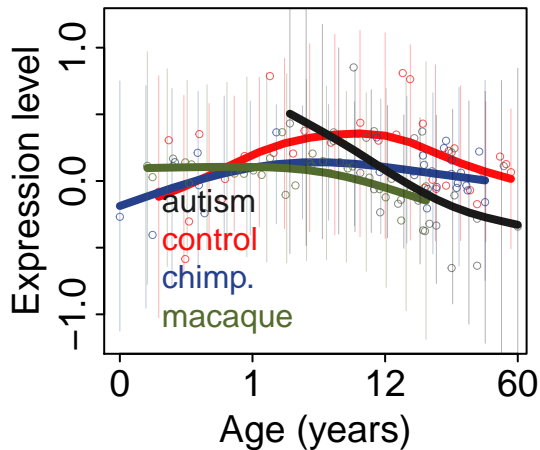

**Array (synapse-related genes)**

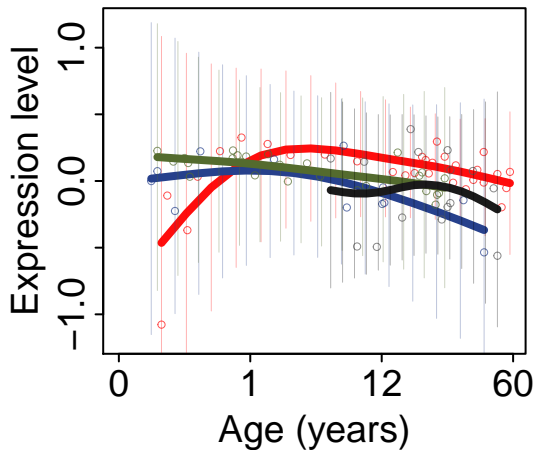

Supplement: Supplementary file 1 [file 1 › S17 Fig.PDF]

**C1**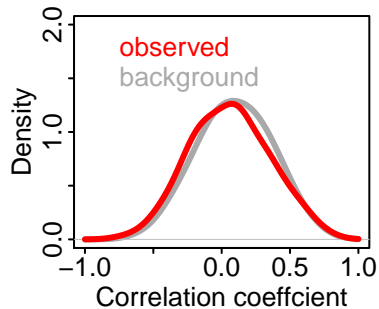**C2**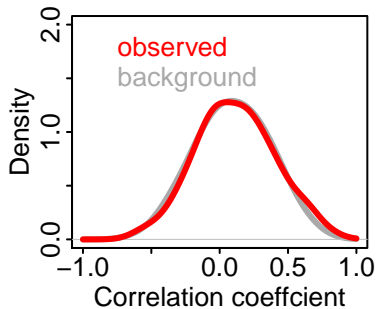**C3\*\*\***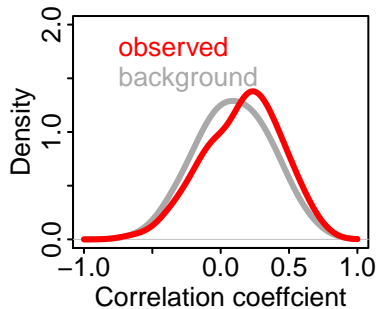**C4**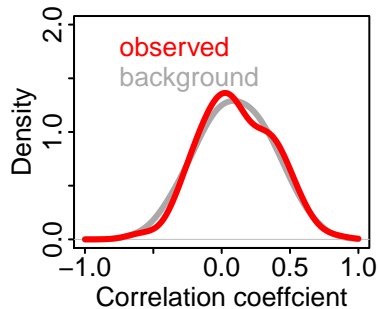**C5\*\***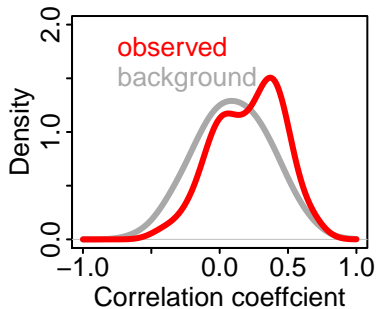**C6**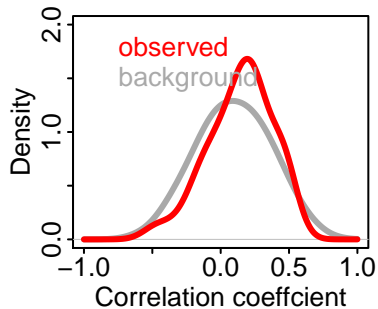

Supplement: Supplementary file 1 [file 1 › S18 Fig.PDF]

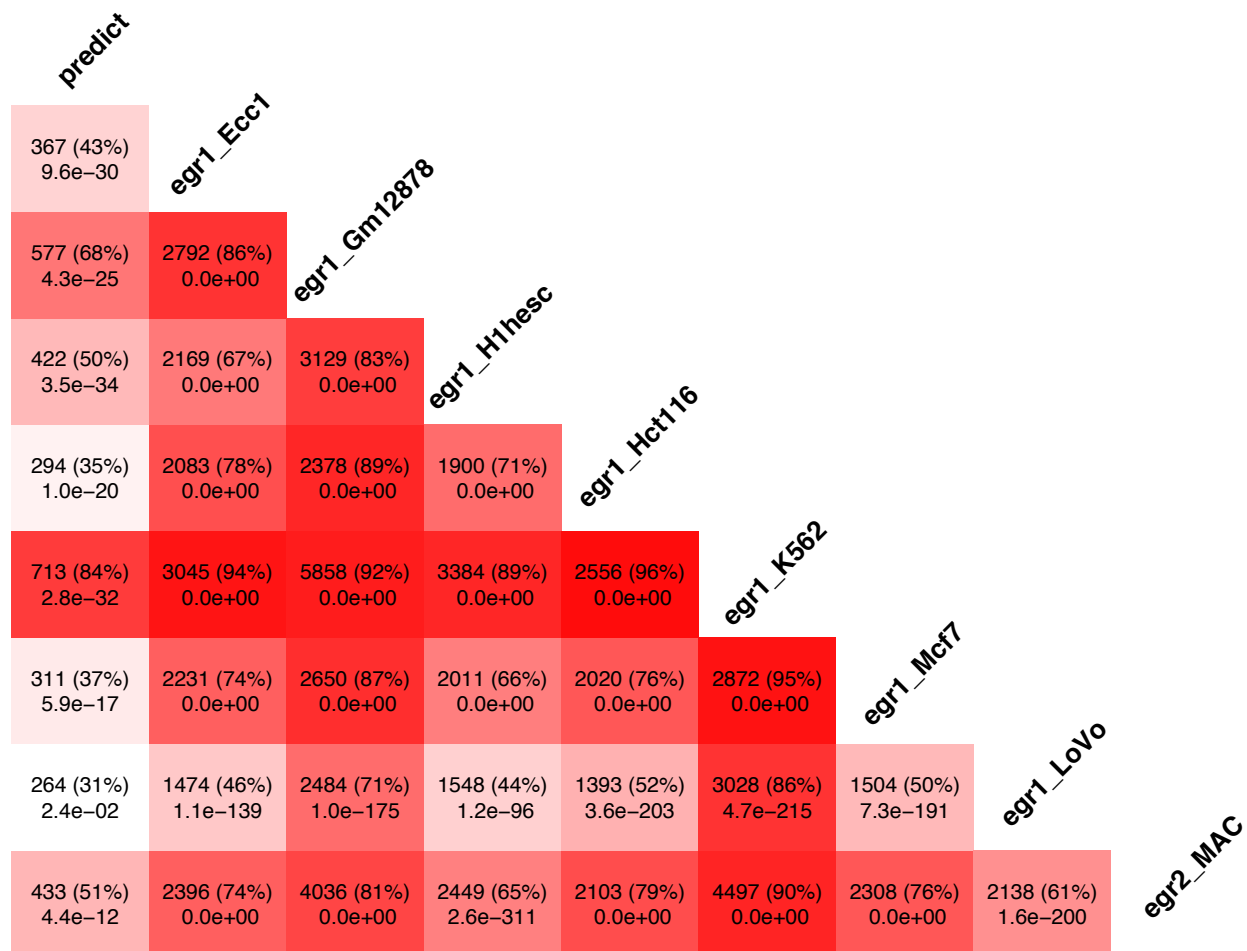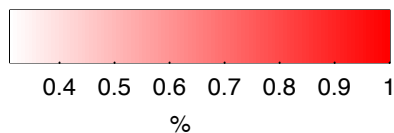

Supplement: Supplementary file 1 [file 1 › S19 Fig.PDF]

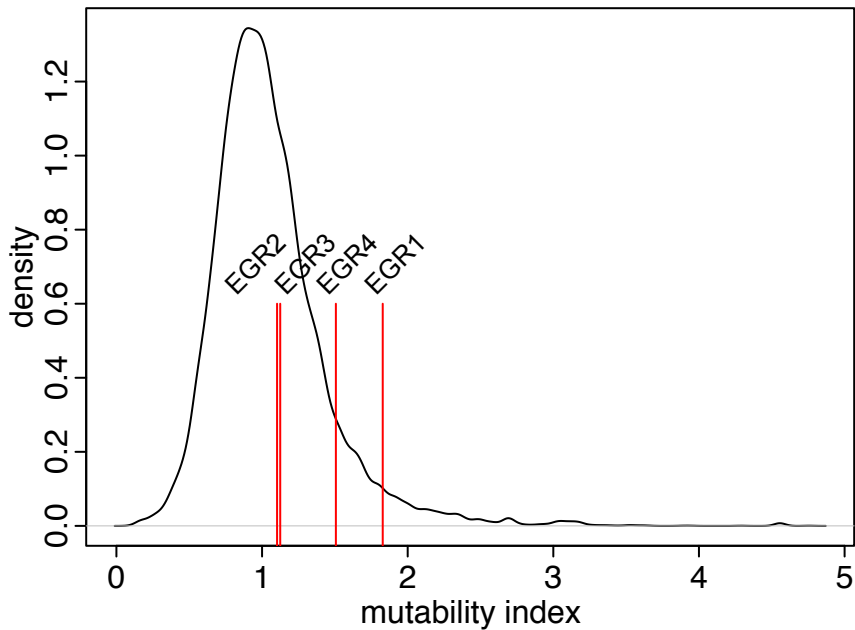

Supplement: Supplementary file 1 [file 1 › S20 Fig.PDF]
